# Supplementary material for: Genetic Diversity and Signatures of Selection for Thermal Stress in Cattle and Other Two Bos Species Adapted to Divergent Climatic Conditions
Source: Front Genet. 2021 Feb 3;12:604823. doi: 10.3389/fgene.2021.604823 (PMC7887320; doi:10.3389/fgene.2021.604823)
Supplement: Supplementary file 1 [file Data_Sheet_1.xlsx]

## Sheet: Table S1
Table S1. Description of thirty two cattle, Datong yak and Bali populations.
Population	Abbreviation	Species	Sample size	Adaptation	Data Source
Angus	ANG	Bos taurus	30	Cold/thermoneutral	WIDDE 2
Arabic zebu	ZAR	Bos indicus	35	Heat	WIDDE 2
Bali Bos javanicus	BLI	Bos javanicus	20	Heat	WIDDE 2
Bangladesh zebu	BAD	Bos indicus	15	Heat	WIDDE 2
Boran	BAN	Bos taurus sspp.1	20	Heat	WIDDE 2
Brown Swiss	BSW	Bos taurus	24	Cold/thermoneutral	WIDDE 2
Busha	BUS	Bos taurus	35	Harsh cold	WIDDE 2
Canchin	CAN	Bos taurus sspp.1	20	Heat	WIDDE 2
Creole from Guadalupe	CGU	Bos taurus sspp.1	30	Heat	WIDDE 2
Dengchuan	DC	Bos taurus sspp.1	31	Heat	-
East African Shorthorn zebu	EAZ	Bos taurus sspp.1	20	Heat	WIDDE 2
Gir	GIR	Bos indicus	24	Heat	WIDDE 2
Hazake	KZK	Bos taurus	16	Cold/thermoneutral	-
Hereford	HFD	Bos taurus	31	Cold/thermoneutral	WIDDE 2
Holstein	HOL	Bos taurus	30	Cold/thermoneutral	WIDDE 2
Jersey	JER	Bos taurus	26	Cold/thermoneutral	WIDDE 2
Kalmykian	KAL	Bos taurus	22	Cold/thermoneutral	WIDDE 2
Mongolian	MG	Bos taurus	35	Cold/thermoneutral	-
N'dama	NDA	Bos taurus	30	Heat	WIDDE 2
Negra Andaluza	NAN	Bos taurus	32	Cold/thermoneutral	WIDDE 2
Sanhe	SH	Bos taurus	32	Cold/thermoneutral	-
Santa Gertrudis	SGT	Bos taurus	24	Cold/thermoneutral	WIDDE 2
Senepol	SEN	Bos taurus	28	Heat	WIDDE 2
Shorthorn	SHO	Bos taurus	34	Cold/thermoneutral	WIDDE 2
Wannan	WN	Bos taurus sspp.1	31	Heat	-
Wenling	WL	Bos taurus sspp.1	31	Heat	-
Xinjiang Brown	XIN	Bos taurus	35	Cold/thermoneutral	-
Yak	YAK	Bos grunniens	45	Harsh cold	-
Yakutian	YAKU	Bos taurus	26	Harsh cold	WIDDE 2
Yanbian	YAN	Bos taurus	30	Harsh cold	WIDDE 2
Yunnan Humped	DH	Bos taurus sspp.1	16	Heat	-
Zebu Bororo	ZBO	Bos indicus	23	Heat	WIDDE 2
Zebu from Madagascar	ZMA	Bos indicus	35	Heat	WIDDE 2
Zebu Fulani	ZFU	Bos indicus	30	Heat	WIDDE 2
1 Mixed composition (Bos taurus taurus x Bos taurus indicus)
2 Sempéré G, Moazami-Goudarzi K, Eggen A, Laloë D, Gautier M and Flori L. WIDDE: a Web-Interfaced next generation Database for genetic Diversity Exploration, with a first application in cattle, BMC Genomics.2015, 16:940.

## Sheet: Table S2
Table S2. Proportion of runs of homozygosity (ROH) segments in each length category for eight Chinese cattle breeds and yak.
Population	ROH length (Kb)
	< 2,500	2,500 – 5,000	5,000 – 10,000	10,000 – 15,000	> 15,000
Yunnan Humped	0.383	0.515	0.057	0.007	0.039
Dengchuan	0.445	0.425	0.043	0.021	0.066
Wenling Humped	0.329	0.53	0.088	0.025	0.027
Wannan	0.395	0.531	0.053	0.005	0.016
Sanhe	0.176	0.461	0.18	0.098	0.086
Mongolian	0.151	0.306	0.206	0.11	0.227
Hazake	0.333	0.472	0.139	0.056	0
Xinjiang Brown	0.519	0.224	0.14	0.064	0.053
Datong Yak	0.161	0.169	0.197	0.142	0.331

## Sheet: Table S3
Table S3. Consistency of gametic phase at given distances between eight local Chinese cattle breeds.
	Distance (Kb)
Populations	10	20	40	60	100	200	500	1000
Yunnan Humped and Dengchuan	0.594	0.49	0.443	0.397	0.33	0.237	0.131	0.047
Yunnan Humped and Wannan	0.618	0.417	0.433	0.361	0.315	0.237	0.132	0.061
Yunnan Humped and Wenling Humped	0.628	0.46	0.404	0.333	0.295	0.216	0.118	0.067
Yunnan Humped and Sanhe	0.32	0.18	0.101	0.091	0.058	0.033	0.032	0.02
Yunnan Humped and Mongolian	0.319	0.178	0.134	0.109	0.082	0.044	0.012	0.004
Yunnan Humped and Hazake	0.347	0.157	0.138	0.101	0.067	0.033	0.029	0.025
Yunnan Humped and Xinjiang Brown	0.298	0.121	0.094	0.08	0.051	0.038	0.027	0.018
Dengchuan and Wannan	0.784	0.512	0.488	0.448	0.388	0.307	0.193	0.113
Dengchuan and Wenling Humped	0.682	0.486	0.444	0.393	0.338	0.265	0.168	0.109
Dengchuan and Sanhe	0.462	0.183	0.16	0.146	0.094	0.057	0.02	0.011
Dengchuan and Mongolian	0.471	0.245	0.243	0.203	0.152	0.089	0.021	0.003
Dengchuan and Hazake	0.478	0.224	0.211	0.174	0.114	0.065	0.017	0.015
Dengchuan and Xinjiang Brown	0.46	0.155	0.134	0.121	0.07	0.046	0.045	0.024
Wannan and Wenling Humped	0.7413	0.604	0.587	0.54	0.499	0.414	0.313	0.247
Wannan and Sanhe	0.434	0.183	0.146	0.125	0.082	0.036	0.012	0.011
Wannan and Mongolian	0.474	0.197	0.164	0.149	0.111	0.059	0.011	0.009
Wannan and Hazake	0.556	0.175	0.134	0.127	0.095	0.058	0.034	0.01
Wannan and Xinjiang Brown	0.403	0.175	0.115	0.095	0.067	0.031	0.021	0.015
Wenling Humped and Sanhe	0.355	0.138	0.111	0.076	0.038	0.028	0.015	0.009
Wenling Humped and Mongolian	0.44	0.175	0.137	0.132	0.094	0.057	0.017	0.01
Wenling Humped and Hazake	0.438	0.152	0.135	0.096	0.086	0.052	0.023	0.01
Wenling Humped and Xinjiang Brown	0.427	0.15	0.105	0.091	0.06	0.033	0.023	0.015
Sanhe and Mongolian	0.63	0.51	0.434	0.351	0.28	0.175	0.067	0.043
Sanhe and Hazake	0.603	0.397	0.376	0.319	0.25	0.144	0.048	0.02
Sanhe and Xinjiang Brown	0.62	0.352	0.326	0.252	0.182	0.124	0.069	0.045
Mongolian and Hazake	0.624	0.489	0.471	0.385	0.308	0.184	0.081	0.03
Mongolian and Xinjiang Brown	0.495	0.339	0.31	0.25	0.181	0.117	0.076	0.041
Hazake and Xinjiang Brown	0.493	0.39	0.338	0.2696	0.202	0.137	0.105	0.058

## Sheet: Table S4
Table S4. Candidate genes identified by all methods for thermal tolerance in eight local Chinese cattle and Datong yak populations.
Population/Method	Start position (Mb)	End position (Mb)	Chr	Gene ID	Gene name
FST1
HEAT	45988017	46088017	1	ENSBTAG00000024027/ENSBTAG00000015069/ENSBTAG00000013464	TRMT10C/PCNP/CEP97
	67005698	67105698	1	ENSBTAG00000016656	PARP14
	67349528	67449528	1	ENSBTAG00000018877	PDIA5
	70790701	70890701	1	ENSBTAG00000012347	SLC51A
	81652230	81752230	1	ENSBTAG00000001535/ENSBTAG00000017115	LIPH/TMEM41A
	108732509	108832509	1	ENSBTAG00000014713	RARRES1
	112046437	112146437	1	ENSBTAG00000008307	PLCH1
	116532598	116632598	1	ENSBTAG00000001728	IGSF10
	130536554	130636554	1	ENSBTAG00000018538	CEP70
	131061445	131161445	1	ENSBTAG00000015198	DZIP1L
	146252724	146352724	1	ENSBTAG00000005503	PRMT2
	148516789	148616789	1	ENSBTAG00000014306/ENSBTAG00000011876	DOP1B/MORC3
	149501396	149601396	1	ENSBTAG00000001771	DYRK1A
	150524361	150624361	1	ENSBTAG00000000973	KCNJ15
	151075563	151175563	1	ENSBTAG00000043221/ENSBTAG00000009214	SNORA70/ETS2
	153140553	153240553	1	ENSBTAG00000008240	GALNT15
	156593814	156693814	1	ENSBTAG00000012798	KCNH8
	4871527	4971527	2	ENSBTAG00000006262	LIMS2
	18324321	18424321	2	ENSBTAG00000001097	FKBP7
	34301109	34401109	2	ENSBTAG00000000730/ENSBTAG00000048246	GCG/DPP4
	48232793	48332793	2	ENSBTAG00000015291	ORC4
	55990478	56090478	2	ENSBTAG00000024632	LRP1B
	61772538	61872538	2	ENSBTAG00000026842	ZRANB3
	64296990	64396990	2	ENSBTAG00000005238	NCKAP5
	91067564	91167564	2	ENSBTAG00000048876	FAM117B
	96648667	96748667	2	ENSBTAG00000011992	PTH2R
	113666333	113766333	2	ENSBTAG00000019152	NYAP2
	119920477	120020477	2	ENSBTAG00000011964	DIS3L2
	120864934	120964934	2	ENSBTAG00000018065/ENSBTAG00000026684	YARS1/SYNC
	125198041	125298041	2	ENSBTAG00000027051/ENSBTAG00000043989	PTAFR/EYA3
	128434790	128534790	2	ENSBTAG00000010278	STPG1
	131684005	131784005	2	ENSBTAG00000040215	EIF4G3
	131944228	132044228	2	ENSBTAG00000017644/ENSBTAG00000006085	KIF17/DDOST
	1082726	1182726	3	ENSBTAG00000008931	CREG1
	15416136	15516136	3	ENSBTAG00000000057/ENSBTAG00000017104/ENSBTAG00000010617/ENSBTAG00000003535	THBS3/MUC1/KRTCAP2/DPM3
	19287220	19387220	3	ENSBTAG00000021289	POGZ
	19810064	19910064	3	ENSBTAG00000021037	ARNT
	23433332	23533332	3	ENSBTAG00000032193	REG4
	29434511	29534511	3	ENSBTAG00000003614/ENSBTAG00000012419/ENSBTAG00000019617	AP4B1/BCL2L15/PTPN22
	31328175	31428175	3	ENSBTAG00000031654	KCND3
	33641011	33741011	3	ENSBTAG00000001845/ENSBTAG00000001842	EPS8L3/GSTM3
	33845762	33945762	3	ENSBTAG00000013017/ENSBTAG00000014083	GNAT2/AMIGO1
	34389644	34489644	3	ENSBTAG00000020384/ENSBTAG00000017129	WDR47/CLCC1
	40418958	40518958	3	ENSBTAG00000021217	COL11A1
	42328836	42428836	3	ENSBTAG00000019026	EXTL2
	45946935	46046935	3	ENSBTAG00000031358	DPYD
	48550937	48650937	3	ENSBTAG00000020345	CNN3
	48911484	49011484	3	ENSBTAG00000007101	F3
	65634294	65734294	3	ENSBTAG00000019733	ADGRL4
	74869850	74969850	3	ENSBTAG00000015482	ANKRD13C
	76798628	76898628	3	ENSBTAG00000020494	RPE65
	77909050	78009050	3	ENSBTAG00000012957	SERBP1
	82110715	82210715	3	ENSBTAG00000030710	ITGB3BP
	85727031	85827031	3	ENSBTAG00000009481	C3H1orf87
	88602002	88702002	3	ENSBTAG00000013802	DAB1
	91880742	91980742	3	ENSBTAG00000010717	SSBP3
	92032212	92132212	3	ENSBTAG00000020037/ENSBTAG00000020036	CYB5RL/CDCP2
	92140368	92240368	3	ENSBTAG00000009526/ENSBTAG00000024195	TMEM59/LDLRAD1
	92975923	93075923	3	ENSBTAG00000000736/ENSBTAG00000003485/ENSBTAG00000003484	LRP8/MAGOH/CZIB
	93156341	93256341	3	ENSBTAG00000012516	SLC1A7
	93357420	93457420	3	ENSBTAG00000002910	ECHDC2
	98954471	99054471	3	ENSBTAG00000017844/ENSBTAG00000043793/ENSBTAG00000005029/ENSBTAG00000002555	STIL/5S_rRNA/TAL1/PDZK1IP1
	100273316	100373316	3	ENSBTAG00000016377	IPP
	100761809	100861809	3	ENSBTAG00000012648	ZSWIM5
	101976561	102076561	3	ENSBTAG00000008690	SLC6A9
	102760330	102860330	3	ENSBTAG00000021544	EBNA1BP2
	105486719	105586719	3	ENSBTAG00000018726	RIMS3
	110243079	110343079	3	ENSBTAG00000016694	KIAA0319L
	9565916	9665916	4	ENSBTAG00000034936	ANKIB1
	12018919	12118919	4	ENSBTAG00000053735	PEG10
	12476900	12576900	4	ENSBTAG00000024426	PPP1R9A
	14515634	14615634	4	ENSBTAG00000015925	SDHAF3
	15897178	15997178	4	ENSBTAG00000047004	UMAD1
	27118288	27218288	4	ENSBTAG00000003808	HDAC9
	31832336	31932336	4	ENSBTAG00000016014/ENSBTAG00000000604/ENSBTAG00000019403	NUP42/GPNMB/MALSU1
	35366336	35466336	4	ENSBTAG00000024394	SEMA3D
	38603121	38703121	4	ENSBTAG00000020569	CACNA2D1
	40016281	40116281	4	ENSBTAG00000006138	SEMA3C
	48599499	48699499	4	ENSBTAG00000021849/ENSBTAG00000010062	DUS4L/SLC26A4
	50497931	50597931	4	ENSBTAG00000021469	CTTNBP2
	52287891	52387891	4	ENSBTAG00000014228	TFEC
	60044523	60144523	4	ENSBTAG00000003490	ELMO1
	60759733	60859733	4	ENSBTAG00000002011	KIAA0895
	61394963	61494963	4	ENSBTAG00000015105	HERPUD2
	66272307	66372307	4	ENSBTAG00000007870/ENSBTAG00000016223	FKBP14/SCRN1
	68892061	68992061	4	ENSBTAG00000024341/ENSBTAG00000012211/ENSBTAG00000008139/ENSBTAG00000001063/ENSBTAG00000008138/ENSBTAG00000013263	HOXA6/HOXA5/HOXA3/HOXA4/HOXA2/HOXA1
	70789756	70889756	4	ENSBTAG00000019342	OSBPL3
	72225120	72325120	4	ENSBTAG00000007136	ADAM22
	74300995	74400995	4	ENSBTAG00000015749	STEAP1
	76474685	76574685	4	ENSBTAG00000010504/ENSBTAG00000043398/ENSBTAG00000043541	TBRG4/SNORA5C/SNORA5A
	80831001	80931001	4	ENSBTAG00000018715	MPLKIP
	82088809	82188809	4	ENSBTAG00000007305	VPS41
	82500244	82600244	4	ENSBTAG00000031967	AMPH
	102135505	102235505	4	ENSBTAG00000002431	TRIM24
	103202542	103302542	4	ENSBTAG00000020225	TBXAS1
	103729073	103829073	4	ENSBTAG00000012261	RAB19
	106143024	106243024	4	ENSBTAG00000015510	EPHB6
	118467158	118567158	4	ENSBTAG00000008025	UBE3C
	119502457	119602457	4	ENSBTAG00000024157	WDR60
	2079114	2179114	5	ENSBTAG00000018575	TRHDE
	7601053	7701053	5	ENSBTAG00000009852	NAV3
	8876782	8976782	5	ENSBTAG00000034693	SYT1
	23097391	23197391	5	ENSBTAG00000007447	NUDT4
	26826852	26926852	5	ENSBTAG00000007829/ENSBTAG00000021464	CSAD/SPRYD3
	42787081	42887081	5	ENSBTAG00000015311/ENSBTAG00000015296	PTPRR/PTPRB
	45370592	45470592	5	ENSBTAG00000019738	MDM1
	47396050	47496050	5	ENSBTAG00000033726	GRIP1
	57333719	57433719	5	ENSBTAG00000004019/ENSBTAG00000031146/ENSBTAG00000009051	PMEL/PYM1/MMP19
	69771407	69871407	5	ENSBTAG00000004781	POLR3B
	71070972	71170972	5	ENSBTAG00000020634	FBXO7
	75672589	75772589	5	ENSBTAG00000014237	CYTH4
	76289294	76389294	5	ENSBTAG00000000606	SYT10
	83395048	83495048	5	ENSBTAG00000002313	ITPR2
	88726643	88826643	5	ENSBTAG00000021083	RECQL
	104180386	104280386	5	ENSBTAG00000012265	VWF
	106106728	106206728	5	ENSBTAG00000000275/ENSBTAG00000018940	PARP11/CRACR2A
	107503915	107603915	5	ENSBTAG00000005221	WNK1
	110860712	110960712	5	ENSBTAG00000012503/ENSBTAG00000017439/ENSBTAG00000017462	MGAT3/MIEF1/ATF4
	111263740	111363740	5	ENSBTAG00000015157/ENSBTAG00000014247	GRAP2/FAM83F
	112895811	112995811	5	ENSBTAG00000013173/ENSBTAG00000013174	SEPTIN3/WBP2NL
	113449150	113549150	5	ENSBTAG00000037110	U12
	113864967	113964967	5	ENSBTAG00000018073	TSPO
	116755792	116855792	5	ENSBTAG00000021803	GRAMD4
	14839808	14939808	6	ENSBTAG00000009059	PITX2
	15300850	15400850	6	ENSBTAG00000010564	ELOVL6
	17044708	17144708	6	ENSBTAG00000006844	LEF1
	44368493	44468493	6	ENSBTAG00000013980	SOD3
	58219352	58319352	6	ENSBTAG00000006044	KLHL5
	59570476	59670476	6	ENSBTAG00000001572	NSUN7
	88436150	88536150	6	ENSBTAG00000017121/ENSBTAG00000017131	ALB/AFP
	91790239	91890239	6	ENSBTAG00000021372	SEPTIN11
	100824084	100924084	6	ENSBTAG00000003959	ARHGAP24
	114084405	114184405	6	ENSBTAG00000027434	SORCS2
	116664864	116764864	6	ENSBTAG00000020108	LETM1
	2004076	2104076	7	ENSBTAG00000014665	ADAMTS2
	14254280	14354280	7	ENSBTAG00000049881	ZNF266
	14352009	14452009	7	ENSBTAG00000049881/ENSBTAG00000049452/ENSBTAG00000016988	ZNF266/UBL5/PIN1
	15332521	15432521	7	ENSBTAG00000012048/ENSBTAG00000045893/ENSBTAG00000019220	CARM1/TIMM29/SMARCA4
	15843312	15943312	7	ENSBTAG00000011207	CNN1
	16321434	16421434	7	ENSBTAG00000002629/ENSBTAG00000046837/ENSBTAG00000005592/ENSBTAG00000032137	TEX45/ZNF358/MCOLN1/PNPLA6
	25576694	25676694	7	ENSBTAG00000015307	FBN2
	26887690	26987690	7	ENSBTAG00000017835/ENSBTAG00000006797	C7H5orf63/MARCHF3
	30320816	30420816	7	ENSBTAG00000013184	CEP120
	34877117	34977117	7	ENSBTAG00000002143	DTWD2
	38505200	38605200	7	ENSBTAG00000010541/ENSBTAG00000010543	ZNF346/FGFR4
	38763487	38863487	7	ENSBTAG00000025426/ENSBTAG00000005009/ENSBTAG00000008497	NSD1/PRELID1/RGS14
	40340527	40440527	7	ENSBTAG00000019646	TRIM41
	50155517	50255517	7	ENSBTAG00000014182	CTNNA1
	54001562	54101562	7	ENSBTAG00000027151	ARHGAP26
	57591183	57691183	7	ENSBTAG00000050458/ENSBTAG00000003259	U6/TCERG1
	61970599	62070599	7	ENSBTAG00000013744/ENSBTAG00000025136	SYNPO/MYOZ3
	64842251	64942251	7	ENSBTAG00000005800	GRIA1
	80947126	81047126	7	ENSBTAG00000030259	RASGRF2
	90152205	90252205	7	ENSBTAG00000006031	ADGRV1
	97937849	98037849	7	ENSBTAG00000011864	RGMB
	11428184	11528184	8	ENSBTAG00000005907/ENSBTAG00000005905	NDUFB6/TOPORS
	22080988	22180988	8	ENSBTAG00000051567	CDKN2B
	27823118	27923118	8	ENSBTAG00000003669	BNC2
	28781847	28881847	8	ENSBTAG00000007872	PSIP1
	39860889	39960889	8	ENSBTAG00000011048	SPATA6L
	48061618	48161618	8	ENSBTAG00000006831	C8H9orf85
	50645489	50745489	8	ENSBTAG00000021699	RORB
	59332947	59432947	8	ENSBTAG00000011397	UNC13B
	60371946	60471946	8	ENSBTAG00000000076/ENSBTAG00000000078/ENSBTAG00000021696	RECK/GLIPR2/CCIN
	60822538	60922538	8	ENSBTAG00000021686	MELK
	70385604	70485604	8	ENSBTAG00000013528/ENSBTAG00000025830	CHMP7/R3HCC1
	70667409	70767409	8	ENSBTAG00000019099	SLC25A37
	73750791	73850791	8	ENSBTAG00000018373	DPYSL2
	75709261	75809261	8	ENSBTAG00000031793	NUDT2
	85736900	85836900	8	ENSBTAG00000002220	SPTLC1
	88726350	88826350	8	ENSBTAG00000001941	SEMA4D
	101181366	101281366	8	ENSBTAG00000053723	bta-mir-7863
	103434427	103534427	8	ENSBTAG00000019807/ENSBTAG00000029902	COL27A1/MIR455
	112036855	112136855	8	ENSBTAG00000003540/ENSBTAG00000050986	MYT1L/PXDN
	29802432	29902432	9	ENSBTAG00000009575/ENSBTAG00000053243	TBC1D32/bta-mir-12063
	29860981	29960981	9	ENSBTAG00000009575	TBC1D32
	33416950	33516950	9	ENSBTAG00000047600	ROS1
	43566136	43666136	9	ENSBTAG00000005400	ATG5
	50229445	50329445	9	ENSBTAG00000015744/ENSBTAG00000018528	CCNC/USP45
	67251858	67351858	9	ENSBTAG00000010229	LAMA2
	74125488	74225488	9	ENSBTAG00000015888	PDE7B
	80584085	80684085	9	ENSBTAG00000003496	AIG1
	81974459	82074459	9	ENSBTAG00000009665	UTRN
	83411690	83511690	9	ENSBTAG00000044181	GRM1
	87328346	87428346	9	ENSBTAG00000026586	PPP1R14C
	88398285	88498285	9	ENSBTAG00000014788/ENSBTAG00000044223/ENSBTAG00000004098	AKAP12/bta-mir-2285e-2/ARMT1
	94593772	94693772	9	ENSBTAG00000000817	SYNJ2
	103415712	103515712	9	ENSBTAG00000003925	C9H6orf120
	104044973	104144973	9	ENSBTAG00000007686	TBP
	2070126	2170126	10	ENSBTAG00000050601	10
	8040259	8140259	10	ENSBTAG00000020201/ENSBTAG00000020202	S100Z/CRHBP
	12495495	12595495	10	ENSBTAG00000025826	SLC24A1
	18345377	18445377	10	ENSBTAG00000011644	THSD4
	19316262	19416262	10	ENSBTAG00000025814/ENSBTAG00000006708	TMEM202/ARIH1
	19355189	19455189	10	ENSBTAG00000006708	ARIH1
	20742754	20842754	10	ENSBTAG00000010665/ENSBTAG00000018422/ENSBTAG00000018419	CBLN3/RIPK3/ADCY4
	36057186	36157186	10	ENSBTAG00000004420/ENSBTAG00000004421	BAHD1/CHST14
	37544262	37644262	10	ENSBTAG00000008866	GANC
	44551357	44651357	10	ENSBTAG00000031707	FRMD6
	46588835	46688835	10	ENSBTAG00000019390	CA12
	47895151	47995151	10	ENSBTAG00000020814	C2CD4B
	48963809	49063809	10	ENSBTAG00000015904	RORA
	56654765	56754765	10	ENSBTAG00000021876	WDR72
	57709437	57809437	10	ENSBTAG00000024958	FAM214A
	57896593	57996593	10	ENSBTAG00000006489	MYO5A
	58026494	58126494	10	ENSBTAG00000006489/ENSBTAG00000003763	MYO5A/MYO5C
	67576007	67676007	10	ENSBTAG00000002326	LGALS3
	74223641	74323641	10	ENSBTAG00000018947	SYT16
	76243117	76343117	10	ENSBTAG00000025450/ENSBTAG00000054364	SYNE2/bta-mir-2285cq
	77156128	77256128	10	ENSBTAG00000005897	FNTB
	79446312	79546312	10	ENSBTAG00000018297/ENSBTAG00000001945	PLEKHH1/ARG2
	80074726	80174726	10	ENSBTAG00000018971	RAD51B
	83246927	83346927	10	ENSBTAG00000015805	SIPA1L1
	84441671	84541671	10	ENSBTAG00000008713	DCAF4
	84901492	85001492	10	ENSBTAG00000025372/ENSBTAG00000046814/ENSBTAG00000002843	RIOX1/ACOT2/ACOT4
	84949308	85049308	10	ENSBTAG00000046814/ENSBTAG00000002843	ACOT2/ACOT4
	85378422	85478422	10	ENSBTAG00000018467/ENSBTAG00000030557	BBOF1/LIN52
	86192499	86292499	10	ENSBTAG00000008664	EIF2B2
	86749458	86849458	10	ENSBTAG00000040078	FLVCR2
	88260081	88360081	10	ENSBTAG00000009923	CIPC
	88300226	88400226	10	ENSBTAG00000009923/ENSBTAG00000016283	CIPC/TMEM63C
	88555589	88655589	10	ENSBTAG00000020471/ENSBTAG00000020477	SAMD15/AHSA1
	101604599	101704599	10	ENSBTAG00000013138	TDP1
	102857770	102957770	10	ENSBTAG00000012545/ENSBTAG00000015385/ENSBTAG00000000359	CASC4/CTDSPL2/EIF3J
	1506094	1606094	11	ENSBTAG00000021181	BUB1
	6571626	6671626	11	ENSBTAG00000013023	MAP4K4
	6879912	6979912	11	ENSBTAG00000005273	IL1R1
	9060713	9160713	11	ENSBTAG00000006150	MRPS9
	28205163	28305163	11	ENSBTAG00000020614	PRKCE
	37683470	37783470	11	ENSBTAG00000011101	EML6
	46828517	46928517	11	ENSBTAG00000019665/ENSBTAG00000019072	IL1RN/PSD4
	48339954	48439954	11	ENSBTAG00000013589	CHMP3
	49533187	49633187	11	ENSBTAG00000005432	CAPG
	51610353	51710353	11	ENSBTAG00000042855	SNORA72
	63359930	63459930	11	ENSBTAG00000007763/ENSBTAG00000016717	SLC1A4/CEP68
	68070700	68170700	11	ENSBTAG00000001105	ANXA4
	70194530	70294530	11	ENSBTAG00000007379	ALK
	74364798	74464798	11	ENSBTAG00000018705/ENSBTAG00000015012	ADCY3/PTRHD1
	77861153	77961153	11	ENSBTAG00000008505	APOB
	88366017	88466017	11	ENSBTAG00000008160	MBOAT2
	92977457	93077457	11	ENSBTAG00000004296	MORN5
	93143697	93243697	11	ENSBTAG00000018426/ENSBTAG00000006716	MRRF/PTGS1
	99263703	99363703	11	ENSBTAG00000012480/ENSBTAG00000012484	TBC1D13/ENDOG
	99556533	99656533	11	ENSBTAG00000001933/ENSBTAG00000052455	PTPA/bta-mir-12056
	100233991	100333991	11	ENSBTAG00000020311	USP20
	100972540	101072540	11	ENSBTAG00000048071/ENSBTAG00000017976	EXOSC2/ABL1
	104406040	104506040	11	ENSBTAG00000007492/ENSBTAG00000004508	ADAMTSL2/DBH
	105321400	105421400	11	ENSBTAG00000047998	COL5A1
	106691315	106791315	11	ENSBTAG00000007882	CACNA1B
	12206375	12306375	12	ENSBTAG00000013879	DGKH
	12635397	12735397	12	ENSBTAG00000008924	TNFSF11
	21107380	21207380	12	ENSBTAG00000008053	WDFY2
	21302699	21402699	12	ENSBTAG00000019863	CCDC70
	24774923	24874923	12	ENSBTAG00000007589	SMAD9
	25166679	25266679	12	ENSBTAG00000008040	SPART
	27694034	27794034	12	ENSBTAG00000021815	STARD13
	30312194	30412194	12	ENSBTAG00000018103	HMGB1
	32260451	32360451	12	ENSBTAG00000015614	LNX2
	33166722	33266722	12	ENSBTAG00000005318	RNF6
	35506098	35606098	12	ENSBTAG00000015943/ENSBTAG00000006177/ENSBTAG00000003314	MICU2/ZDHHC20/SKA3
	65973325	66073325	12	ENSBTAG00000008708	GPC5
	1427972	1527972	13	ENSBTAG00000008338	PLCB1
	2503974	2603974	13	ENSBTAG00000007977	LAMP5
	6772805	6872805	13	ENSBTAG00000017188	ISM1
	19017761	19117761	13	ENSBTAG00000014991	PARD3
	20321685	20421685	13	ENSBTAG00000043964	ARL5B
	21392240	21492240	13	ENSBTAG00000009475	PLXDC2
	24366810	24466810	13	ENSBTAG00000047752	OTUD1
	63113288	63213288	13	ENSBTAG00000003962/ENSBTAG00000039313	C13H20orf144/ZNF341
	64018392	64118392	13	ENSBTAG00000005504	TP53INP2
	81019871	81119871	13	ENSBTAG00000007917	TSHZ2
	1601311	1701311	14	ENSBTAG00000034498/ENSBTAG00000005762/ENSBTAG00000016210/ENSBTAG00000016209	LY6D/LYNX1/LYPD2/SLURP1
	2753998	2853998	14	ENSBTAG00000009578	PTK2
	13899095	13999095	14	ENSBTAG00000026172	LRATD2
	20556100	20656100	14	ENSBTAG00000002448	SNTG1
	22593306	22693306	14	ENSBTAG00000044050	XKR4
	29111409	29211409	14	ENSBTAG00000036421	bta-mir-124a-2
	30768549	30868549	14	ENSBTAG00000002192	VXN
	32125300	32225300	14	ENSBTAG00000022169	PREX2
	36006525	36106525	14	ENSBTAG00000040496/ENSBTAG00000054013	KCNB2/bta-mir-1603
	45966583	46066583	14	ENSBTAG00000043996	SAMD12
	47565069	47665069	14	ENSBTAG00000014032	EIF3H
	48676666	48776666	14	ENSBTAG00000017694	TRPS1
	60984113	61084113	14	ENSBTAG00000033902	SLC25A32
	63777753	63877753	14	ENSBTAG00000011271/ENSBTAG00000001254	SNX31/ANKRD46
	74562084	74662084	14	ENSBTAG00000006877	MMP16
	81828266	81928266	14	ENSBTAG00000006770	MTBP
	1442400	1542400	15	ENSBTAG00000009176	ANKRD49
	5678691	5778691	15	ENSBTAG00000015059/ENSBTAG00000053542	MMP13/MMP12
	13985393	14085393	15	ENSBTAG00000037962	MAML2
	20385893	20485893	15	ENSBTAG00000011793	FDX1
	28658543	28758543	15	ENSBTAG00000005215	IL10RA
	28948023	29048023	15	ENSBTAG00000015710/ENSBTAG00000006453/ENSBTAG00000019725	CD3E/CD3G/UBE4A
	29063608	29163608	15	ENSBTAG00000019725/ENSBTAG00000007332/ENSBTAG00000018093	UBE4A/ATP5MG/KMT2A
	29183683	29283683	15	ENSBTAG00000018093/ENSBTAG00000012940/ENSBTAG00000006690/ENSBTAG00000016197	KMT2A/TMEM25/ARCN1/PHLDB1
	30744026	30844026	15	ENSBTAG00000021338/ENSBTAG00000021340	OAF/POU2F3
	31994715	32094715	15	ENSBTAG00000014611	SORL1
	35976517	36076517	15	ENSBTAG00000044185	SOX6
	38231190	38331190	15	ENSBTAG00000006556	COPB1
	40730796	40830796	15	ENSBTAG00000004275	DKK3
	41253655	41353655	15	ENSBTAG00000002914	GALNT18
	43258530	43358530	15	ENSBTAG00000001607	TMEM41B
	58725396	58825396	15	ENSBTAG00000003361	METTL15
	65480435	65580435	15	ENSBTAG00000018261	PDHX
	65667899	65767899	15	ENSBTAG00000011578	CD44
	76215233	76315233	15	ENSBTAG00000006143	CREB3L1
	77310934	77410934	15	ENSBTAG00000018479/ENSBTAG00000018483/ENSBTAG00000055123	PTPMT1/NDUFS3/FAM180B
	4416778	4516778	16	ENSBTAG00000013294/ENSBTAG00000038107	DYRK3/MAPKAPK2
	4560955	4660955	16	ENSBTAG00000006692/ENSBTAG00000002757	IL19/IL20
	6444072	6544072	16	ENSBTAG00000016729	KCNT2
	15312423	15412423	16	ENSBTAG00000008420	BRINP3
	23935319	24035319	16	ENSBTAG00000010460	MARK1
	26050450	26150450	16	ENSBTAG00000018824	MIA3
	35846376	35946376	16	ENSBTAG00000005410	RGS7
	36064564	36164564	16	ENSBTAG00000009938	XCL1
	47218530	47318530	16	ENSBTAG00000040477	CHD5
	51386142	51486142	16	ENSBTAG00000014511/ENSBTAG00000046758/ENSBTAG00000014705	C16H1orf159/RNF223/HES4
	51436543	51536543	16	ENSBTAG00000014705/ENSBTAG00000014540/ENSBTAG00000016528	HES4/PERM1/NOC2L
	59563869	59663869	16	ENSBTAG00000054408/ENSBTAG00000015537	bta-mir-2285x/RASAL2
	71532546	71632546	16	ENSBTAG00000018548/ENSBTAG00000005137	INTS7/LPGAT1
	75255757	75355757	16	ENSBTAG00000001173	PLXNA2
	75640887	75740887	16	ENSBTAG00000051920/ENSBTAG00000051791	bta-mir-29b-2/bta-mir-29d
	76837727	76937727	16	ENSBTAG00000051004/ENSBTAG00000013499	C1orf53/LHX9
	77210672	77310672	16	ENSBTAG00000016943	NEK7
	77623193	77723193	16	ENSBTAG00000023144	PTPRC
	2831443	2931443	17	ENSBTAG00000006745/ENSBTAG00000001638/ENSBTAG00000007234	FGG/FGA/PLRG1
	3049005	3149005	17	ENSBTAG00000024545	DCHS2
	6928314	7028314	17	ENSBTAG00000018546	LRBA
	11701720	11801720	17	ENSBTAG00000034522	SLC10A7
	19773070	19873070	17	ENSBTAG00000046209	U1
	35179850	35279850	17	ENSBTAG00000020883	IL2
	47848312	47948312	17	ENSBTAG00000002950	TMEM132D
	53017783	53117783	17	ENSBTAG00000016779	CLIP1
	54895167	54995167	17	ENSBTAG00000008571	CUX2
	58857025	58957025	17	ENSBTAG00000001888	MED13L
	62404044	62504044	17	ENSBTAG00000003696	BICDL1
	69004924	69104924	17	ENSBTAG00000001030	MTMR3
	70015396	70115396	17	ENSBTAG00000002828/ENSBTAG00000010662	RNF185/LIMK2
	72130821	72230821	17	ENSBTAG00000005951	HIC2
	72364626	72464626	17	ENSBTAG00000019244/ENSBTAG00000002130	P2RX6/SMPD4
	2814232	2914232	18	ENSBTAG00000006550	GABARAPL2
	2921984	3021984	18	ENSBTAG00000015686	TERF2IP
	5671529	5771529	18	ENSBTAG00000015894	WWOX
	12897633	12997633	18	ENSBTAG00000011632	MAP1LC3B
	14030722	14130722	18	ENSBTAG00000019184	TRAPPC2L
	14576788	14676788	18	ENSBTAG00000001904/ENSBTAG00000040356	ZNF276/SPIRE2
	25931472	26031472	18	ENSBTAG00000012919	MMP15
	26232010	26332010	18	ENSBTAG00000003894/ENSBTAG00000020781	NDRG4/SETD6
	43316348	43416348	18	ENSBTAG00000010403	FAAP24
	43564762	43664762	18	ENSBTAG00000031810/ENSBTAG00000047062	WDR88/LRP3
	46291055	46391055	18	ENSBTAG00000013436/ENSBTAG00000013440/ENSBTAG00000013444/ENSBTAG00000055082	HAUS5/RBM42/ETV2/COX6B1
	48566951	48666951	18	ENSBTAG00000001778/ENSBTAG00000001782	NFKBIB/MRPS12
	49475635	49575635	18	ENSBTAG00000009414	PSMC4
	51738596	51838596	18	ENSBTAG00000030939/ENSBTAG00000001260/ENSBTAG00000030933/ENSBTAG00000049726	ZNF575/PINLYP/ZNF576/SRRM5
	52037186	52137186	18	ENSBTAG00000012522/ENSBTAG00000026263/ENSBTAG00000050035/ENSBTAG00000049610	ZNF283/ZNF45/ZNF226/ZNF234
	52528174	52628174	18	ENSBTAG00000009493/ENSBTAG00000009494/ENSBTAG00000009495/ENSBTAG00000015318/ENSBTAG00000001781	BCL3/CBLC/BCAM/NECTIN2/TOMM40
	53082012	53182012	18	ENSBTAG00000014187/ENSBTAG00000019604	PPM1N/VASP
	54506209	54606209	18	ENSBTAG00000004138	BICRA
	55540144	55640144	18	ENSBTAG00000013343/ENSBTAG00000023417/ENSBTAG00000001996/ENSBTAG00000023415/ENSBTAG00000002844	FTL/RUVBL2/SNRNP70/LIN7B/PPFIA3
	55571823	55671823	18	ENSBTAG00000023417/ENSBTAG00000001996/ENSBTAG00000023415/ENSBTAG00000002844/ENSBTAG00000006139	RUVBL2/SNRNP70/LIN7B/PPFIA3/TRPM4
	64444781	64544781	18	ENSBTAG00000003261/ENSBTAG00000038926/ENSBTAG00000017872	AURKC/ZNF805/ZNF304
	65718024	65818024	18	ENSBTAG00000038534/ENSBTAG00000006422	ZNF446/TRIM28
	5033994	5133994	19	ENSBTAG00000007013/ENSBTAG00000016078	TOM1L1/STXBP4
	17248218	17348218	19	ENSBTAG00000015527	MYO1D
	23427516	23527516	19	ENSBTAG00000016806	PAFAH1B1
	23555621	23655621	19	ENSBTAG00000016806/ENSBTAG00000020000	PAFAH1B1/RAP1GAP2
	25240738	25340738	19	ENSBTAG00000015593/ENSBTAG00000002982	KIAA0753/PITPNM3
	27479791	27579791	19	ENSBTAG00000008605/ENSBTAG00000048062/ENSBTAG00000014693/ENSBTAG00000051958/ENSBTAG00000014377	DNAH2/KDM6B/TMEM88/CYB5D1/CHD3
	27837581	27937581	19	ENSBTAG00000031509/ENSBTAG00000018809/ENSBTAG00000020688	PFAS/RANGRF/ARHGEF15
	40312520	40412520	19	ENSBTAG00000021461/ENSBTAG00000021462/ENSBTAG00000010745	PSMD3/CSF3/THRA
	41876734	41976734	19	ENSBTAG00000002282/ENSBTAG00000017663	EIF1/GAST
	44381617	44481617	19	ENSBTAG00000039485/ENSBTAG00000005696	MEIOC/DBF4B
	44758197	44858197	19	ENSBTAG00000006051/ENSBTAG00000006054/ENSBTAG00000006056/ENSBTAG00000024974	NMT1/ACBD4/HEXIM1/HEXIM2
	45188884	45288884	19	ENSBTAG00000024942	RPRML
	47957453	48057453	19	ENSBTAG00000008151/ENSBTAG00000021058	MAP3K3/DDX42
	51395450	51495450	19	ENSBTAG00000018271/ENSBTAG00000019972	SLC38A10/TEPSIN
	54949876	55049876	19	ENSBTAG00000018258	SRSF2
	57048859	57148859	19	ENSBTAG00000030166	BTBD17
	2365716	2465716	20	ENSBTAG00000053195/ENSBTAG00000002865	bta-mir-12032/KCNIP1
	15203542	15303542	20	ENSBTAG00000029760	bta-mir-320a-2
	19537484	19637484	20	ENSBTAG00000036375	bta-mir-582
	23112992	23212992	20	ENSBTAG00000017745/ENSBTAG00000052935	IL6ST/bta-mir-2359
	33383160	33483160	20	ENSBTAG00000014177/ENSBTAG00000001997	C6/MROH2B
	35838849	35938849	20	ENSBTAG00000010423	LIFR
	36907716	37007716	20	ENSBTAG00000002458	NUP155
	48979369	49079369	20	ENSBTAG00000002845	CDH10
	56559171	56659171	20	ENSBTAG00000016444	RETREG1
	62247004	62347004	20	ENSBTAG00000017222	CTNND2
	62865139	62965139	20	ENSBTAG00000010801	CMBL
	71095037	71195037	20	ENSBTAG00000015843/ENSBTAG00000001329/ENSBTAG00000012567	SLC6A3/CLPTM1L/TERT
	7811393	7911393	21	ENSBTAG00000021527	IGF1R
	22512920	22612920	21	ENSBTAG00000020250	SLC28A1
	22640957	22740957	21	ENSBTAG00000015909	PDE8A
	30335129	30435129	21	ENSBTAG00000001396	ADAMTS7
	30731415	30831415	21	ENSBTAG00000012909/ENSBTAG00000002504	CRABP1/IREB2
	32494201	32594201	21	ENSBTAG00000020441	HMG20A
	34115847	34215847	21	ENSBTAG00000000010	UBL7
	34193875	34293875	21	ENSBTAG00000000010/ENSBTAG00000011446	UBL7/SEMA7A
	43067013	43167013	21	ENSBTAG00000017719	AKAP6
	51478760	51578760	21	ENSBTAG00000003684	LRFN5
	56735345	56835345	21	ENSBTAG00000010227	CPSF2
	61044140	61144140	21	ENSBTAG00000021717	BDKRB2
	61624924	61724924	21	ENSBTAG00000014230	VRK1
	64732256	64832256	21	ENSBTAG00000013491	EML1
	4137696	4237696	22	ENSBTAG00000044062/ENSBTAG00000049450	RBMS3/bta-mir-11990
	6567917	6667917	22	ENSBTAG00000009826	GPD1L
	14834534	14934534	22	ENSBTAG00000014162	ACKR2
	26983445	27083445	22	ENSBTAG00000007615	CNTN3
	29804903	29904903	22	ENSBTAG00000019330	PROK2
	32158759	32258759	22	ENSBTAG00000007624	FRMD4B
	35065756	35165756	22	ENSBTAG00000010360	LRIG1
	37405074	37505074	22	ENSBTAG00000015112	PSMD6
	41430732	41530732	22	ENSBTAG00000014418	FHIT
	44515593	44615593	22	ENSBTAG00000053005/ENSBTAG00000010029	bta-mir-2371/ERC2
	47113956	47213956	22	ENSBTAG00000010027	CHDH
	49959060	50059060	22	ENSBTAG00000009489/ENSBTAG00000019161/ENSBTAG00000020965/ENSBTAG00000020963/ENSBTAG00000000484/ENSBTAG00000000483/ENSBTAG00000052388/ENSBTAG00000038084/ENSBTAG00000000480	CACNA2D2/NPRL2/ZMYND10/RASSF1/HYAL2/HYAL1/HYAL3/NAA80/IFRD2
	51130659	51230659	22	ENSBTAG00000014205/ENSBTAG00000021853/ENSBTAG00000021850/ENSBTAG00000021846	PRKAR2A/IP6K2/NCKIPSD/CELSR3
	52690764	52790764	22	ENSBTAG00000031447	PRSS45
	52718833	52818833	22	ENSBTAG00000031447/ENSBTAG00000017812	PRSS45/ALS2CL
	53931070	54031070	22	ENSBTAG00000031287	TMEM158
	56295412	56395412	22	ENSBTAG00000021645/ENSBTAG00000021643/ENSBTAG00000015283/ENSBTAG00000000161	MBD4/EFCAB12/RPL32/TMEM40
	57750571	57850571	22	ENSBTAG00000011896	GRIP2
	7407298	7507298	23	ENSBTAG00000002648/ENSBTAG00000025669/ENSBTAG00000010723	RPS18/B3GALT4/PFDN6
	12469690	12569690	23	ENSBTAG00000014063	DNAH8
	15295878	15395878	23	ENSBTAG00000014211	FOXP4
	15606140	15706140	23	ENSBTAG00000010101	BYSL
	16303481	16403481	23	ENSBTAG00000005967	UBR2
	18934834	19034834	23	ENSBTAG00000004104	RUNX2
	19826145	19926145	23	ENSBTAG00000016302/ENSBTAG00000009978	SLC25A27/TDRD6
	28257706	28357706	23	ENSBTAG00000011358/ENSBTAG00000009960/ENSBTAG00000025526/ENSBTAG00000006966/ENSBTAG00000039695/ENSBTAG00000006960	IER3/FLOT1/MDC1/NRM/PPP1R18/DHX16
	50638170	50738170	23	ENSBTAG00000050155	SERPINB6
	5004955	5104955	24	ENSBTAG00000012889	NETO1
	19574509	19674509	24	ENSBTAG00000004940	CELF4
	25443389	25543389	24	ENSBTAG00000044063	B4GALT6
	29637635	29737635	24	ENSBTAG00000014082	CHST9
	32950605	33050605	24	ENSBTAG00000000517	ANKRD29
	33451960	33551960	24	ENSBTAG00000044678	bta-mir-2285o-3
	35078782	35178782	24	ENSBTAG00000008403/ENSBTAG00000019214	ROCK1/USP14
	40711481	40811481	24	ENSBTAG00000024015	PTPRM
	45002793	45102793	24	ENSBTAG00000043469	7SK
	46124116	46224116	24	ENSBTAG00000001128	RNF165
	48151319	48251319	24	ENSBTAG00000018901	CTIF
	55987219	56087219	24	ENSBTAG00000004005	WDR7
	58075298	58175298	24	ENSBTAG00000011954	SEC11C
	1687669	1787669	25	ENSBTAG00000019073/ENSBTAG00000009928/ENSBTAG00000009961/ENSBTAG00000009964	TRAF7/MLST8/E4F1/DNASE1L2
	6474292	6574292	25	ENSBTAG00000007210	RBFOX1
	14414084	14514084	25	ENSBTAG00000021090	ABCC1
	18904239	19004239	25	ENSBTAG00000018562	TMEM159
	22747558	22847558	25	ENSBTAG00000013169/ENSBTAG00000020184	LCMT1/AQP8
	26817622	26917622	25	ENSBTAG00000050825/ENSBTAG00000003417/ENSBTAG00000003421	TMEM265/PHKG2/RNF40
	28856785	28956785	25	ENSBTAG00000043969	CALN1
	33802697	33902697	25	ENSBTAG00000005798/ENSBTAG00000017941	TRIM50/NSUN5
	35859653	35959653	25	ENSBTAG00000015738/ENSBTAG00000008295/ENSBTAG00000011738	GIGYF1/ACTL6B/TFR2
	36853786	36953786	25	ENSBTAG00000051481/ENSBTAG00000047572/ENSBTAG00000016190/ENSBTAG00000002094	FAM200A/ZNF789/ZNF394/ATP5MF
	37764617	37864617	25	ENSBTAG00000051678	TECPR1
	38092895	38192895	25	ENSBTAG00000000725	USP42
	40812647	40912647	25	ENSBTAG00000052079	bta-mir-12019
	13975318	14075318	26	ENSBTAG00000009383	KIF11
	21313670	21413670	26	ENSBTAG00000012914	WNT8B
	24457253	24557253	26	ENSBTAG00000001017	SLK
	29120744	29220744	26	ENSBTAG00000049283	bta-mir-2285k-4
	33141302	33241302	26	ENSBTAG00000050055	VTI1A
	34750551	34850551	26	ENSBTAG00000006860	VWA2
	46491332	46591332	26	ENSBTAG00000031890	DOCK1
	48894472	48994472	26	ENSBTAG00000050386	MGMT
	16126342	16226342	27	ENSBTAG00000008682/ENSBTAG00000034393	TLR3/FAM149A
	17626145	17726145	27	ENSBTAG00000008639	TRIML1
	19087853	19187853	27	ENSBTAG00000007089	FRG1
	23622435	23722435	27	ENSBTAG00000015541	DLC1
	34116163	34216163	27	ENSBTAG00000003509/ENSBTAG00000019532/ENSBTAG00000017455	PLEKHA2/HTRA4/ADAM9
	34367344	34467344	27	ENSBTAG00000023146	ADAM32
	37975744	38075744	27	ENSBTAG00000004613	CSGALNACT1
	39965948	40065948	27	ENSBTAG00000003793/ENSBTAG00000044625	NGLY1/bta-mir-2401
	44313069	44413069	27	ENSBTAG00000050535	ZNF385D
	3854667	3954667	28	ENSBTAG00000047877	TRIM67
	4358535	4458535	28	ENSBTAG00000047434/ENSBTAG00000050839	TSNAX/DISC1
	25676782	25776782	28	ENSBTAG00000012380	HK1
	27465747	27565747	28	ENSBTAG00000046357	SLC29A3
	28292445	28392445	28	ENSBTAG00000000162/ENSBTAG00000000163	ANAPC16/DDIT4
	29889938	29989938	28	ENSBTAG00000021879	VCL
	9492296	9592296	29	ENSBTAG00000001657	PICALM
	9864372	9964372	29	ENSBTAG00000000457/ENSBTAG00000000455	CCDC89/CREBZF
	10730803	10830803	29	ENSBTAG00000049234	bta-mir-2285k-1
	12239233	12339233	29	ENSBTAG00000027868	DLG2
	12611834	12711834	29	ENSBTAG00000002417	RAB30
	16954428	17054428	29	ENSBTAG00000007439	TENM4
	17626805	17726805	29	ENSBTAG00000002922	GAB2
	28858928	28958928	29	ENSBTAG00000000052	PKNOX2
	29144986	29244986	29	ENSBTAG00000052688/ENSBTAG00000044998/ENSBTAG00000050639/ENSBTAG00000010859	PATE1/bta-mir-2285ce/PATE3/HYLS1
	29488314	29588314	29	ENSBTAG00000012169	FAM118B
	43139370	43239370	29	ENSBTAG00000007061/ENSBTAG00000002238	PPP2R5B/ARL2
	43602252	43702252	29	ENSBTAG00000002039	FRMD8
	49143203	49243203	29	ENSBTAG00000046662	TRPM5
COLD/THERMONEUTRAL	44093107	44093107	1	ENSBTAG00000013663	CMSS1
	87523900	87523900	1	ENSBTAG00000002462	MRPL47
	136983675	136983675	1	ENSBTAG00000031010	ACAD11
	22554508	22554508	2	ENSBTAG00000006970	OLA1
	36178793	36178793	2	ENSBTAG00000009080	ITGB6
	38190106	38190106	2	ENSBTAG00000004267	CCDC148
	52499118	52499118	2	ENSBTAG00000001132	GTDC1
	121306910	121306910	2	ENSBTAG00000009163	TMEM234
	15375797	15375797	3	ENSBTAG00000014393	CLK2
	15988595	15988595	3	ENSBTAG00000007519	ADAR
	91187656	91187656	3	ENSBTAG00000016990	USP24
	92611872	92611872	3	ENSBTAG00000017986	GLIS1
	93967640	93967640	3	ENSBTAG00000002719	ORC1
	95377776	95377776	3	ENSBTAG00000014482	FAF1
	8201640	8201640	4	ENSBTAG00000048664	CDK14
	60274045	60274045	4	ENSBTAG00000003490	ELMO1
	64883958	64883958	5	ENSBTAG00000004145	ANO4
	78435764	78435764	5	ENSBTAG00000020315	DENND5B
	107091795	107091795	5	ENSBTAG00000019058	IQSEC3
	108207925	108207925	5	ENSBTAG00000009050	ADIPOR2
	108696845	108696845	5	ENSBTAG00000010660	CACNA1C
	108937909	108937909	5	ENSBTAG00000009704	CECR2
	19008647	19008647	6	ENSBTAG00000004227	TBCK
	23567252	23567252	6	ENSBTAG00000016005	PPP3CA
	24215802	24215802	6	ENSBTAG00000034206	EMCN
	37349296	37349296	6	ENSBTAG00000021582	NCAPG
	2069559	2069559	7	ENSBTAG00000014665	ADAMTS2
	16927078	16927078	7	ENSBTAG00000003434	CERS4
	19302717	19302717	7	ENSBTAG00000011805	PLIN3
	21096198	21096198	7	ENSBTAG00000007644	GNG7
	54031460	54031460	7	ENSBTAG00000027151	ARHGAP26
	54097690	54097690	7	ENSBTAG00000027151	ARHGAP26
	110558386	110558386	7	ENSBTAG00000035662	CAMK4
	5703035	5703035	8	ENSBTAG00000016845	GALNT7
	48163829	48163829	8	ENSBTAG00000006831	C8H9orf85
	59755132	59755132	8	ENSBTAG00000011403	RUSC2
	61927595	61927595	8	ENSBTAG00000014934	DCAF10
	69633348	69633348	8	ENSBTAG00000015835	PIWIL2
	84616284	84616284	8	ENSBTAG00000008301	WNK2
	15022778	15022778	10	ENSBTAG00000005564	PIAS1
	28283105	28283105	10	ENSBTAG00000020040	LPCAT4
	37240812	37240812	10	ENSBTAG00000006784	PLA2G4B
	51665026	51665026	10	ENSBTAG00000005481	ADAM10
	57862228	57862228	10	ENSBTAG00000006489	MYO5A
	73572468	73572468	10	ENSBTAG00000003276	PRKCH
	60745555	60745555	11	ENSBTAG00000018046	B3GNT2
	67576052	67576052	11	ENSBTAG00000007808	ANTXR1
	102276974	102276974	11	ENSBTAG00000007235	NTNG2
	47760246	47760246	12	ENSBTAG00000019895	PIBF1
	949229	949229	13	ENSBTAG00000008338	PLCB1
	39026246	39026246	13	ENSBTAG00000011882	SLC24A3
	46791024	46791024	13	ENSBTAG00000006531	DIP2C
	63186944	63186944	13	ENSBTAG00000039313	ZNF341
	63825561	63825561	13	ENSBTAG00000000308	ITCH
	1904317	1904317	14	ENSBTAG00000009974	TSNARE1
	24737245	24737245	14	ENSBTAG00000019910	SDCBP
	35912028	35912028	14	ENSBTAG00000040496	KCNB2
	46214806	46214806	14	ENSBTAG00000006209	EXT1
	55204553	55204553	15	ENSBTAG00000016355	UVRAG
	63916654	63916654	15	ENSBTAG00000014884	HIPK3
	80053005	80053005	16	ENSBTAG00000047648	SYT2
	80935485	80935485	16	ENSBTAG00000045789	TNNT2
	57300232	57300232	17	ENSBTAG00000044119	KSR2
	11625551	11625551	18	ENSBTAG00000009918	GSE1
	49117271	49117271	18	ENSBTAG00000004017	PLEKHG2
	27394684	27394684	19	ENSBTAG00000001071	WRAP53
	27441890	27441890	19	ENSBTAG00000008605	DNAH2
	47005470	47005470	19	ENSBTAG00000015713	TLK2
	18613206	18613206	20	ENSBTAG00000017026	DEPDC1B
	20206131	20206131	20	ENSBTAG00000000494	PDE4D
	63782437	63782437	20	ENSBTAG00000005021	SEMA5A
	31201702	31201702	21	ENSBTAG00000002833	FBXO22
	41194373	41194373	21	ENSBTAG00000001617	G2E3
	6764022	6764022	22	ENSBTAG00000001710	CMTM8
	30438276	30438276	22	ENSBTAG00000016533	FOXP1
	4797028	4797028	23	ENSBTAG00000025718	HMGCLL1
	13743884	13743884	23	ENSBTAG00000021381	DAAM2
	24170391	24170391	24	ENSBTAG00000000138	CCDC178
	20183535	20183535	25	ENSBTAG00000018870	OTOA
	27067547	27067547	25	ENSBTAG00000040555	FBXL19
	15516243	15516243	26	ENSBTAG00000018966	PLCE1
	39551498	39551498	26	ENSBTAG00000007981	GRK5
	26603654	26603654	27	ENSBTAG00000033727	RBPMS
	34837911	34837911	28	ENSBTAG00000019313	ZMIZ1
	36040391	36040391	29	ENSBTAG00000017602	TMEM45B
HARSH COLD	24900186	25000186	1	ENSBTAG00000010462	ROBO2
	33702708	33802708	1	ENSBTAG00000009219	CADM2
	35356392	35456392	1	ENSBTAG00000007939	CHMP2B
	45988017	46088017	1	ENSBTAG00000024027/ENSBTAG00000015069/ENSBTAG00000013464	TRMT10C/PCNP/CEP97
	67065284	67165284	1	ENSBTAG00000005071	SLC49A4
	67349528	67449528	1	ENSBTAG00000018877	PDIA5
	70790701	70890701	1	ENSBTAG00000012347	SLC51A
	81606974	81706974	1	ENSBTAG00000001535/ENSBTAG00000017115	LIPH/TMEM41A
	112046437	112146437	1	ENSBTAG00000008307	PLCH1
	116829644	116929644	1	ENSBTAG00000020990/ENSBTAG00000009848	P2RY14/GPR171
	130934703	131034703	1	ENSBTAG00000019949/ENSBTAG00000001451/ENSBTAG00000015198	DBR1/A4GNT/DZIP1L
	135182682	135282682	1	ENSBTAG00000016999	RYK
	136748461	136848461	1	ENSBTAG00000005769	NPHP3
	142246642	142346642	1	ENSBTAG00000021270	UMODL1
	149327013	149427013	1	ENSBTAG00000008167	TTC3
	1668749	1768749	2	ENSBTAG00000015834	ARHGEF4
	13567841	13667841	2	ENSBTAG00000033662	NCKAP1
	18324321	18424321	2	ENSBTAG00000001097	FKBP7
	34301109	34401109	2	ENSBTAG00000000730/ENSBTAG00000048246	GCG/DPP4
	43916884	44016884	2	ENSBTAG00000001887	STAM2
	55990478	56090478	2	ENSBTAG00000024632	LRP1B
	64296990	64396990	2	ENSBTAG00000005238	NCKAP5
	70973597	71073597	2	ENSBTAG00000007111	STEAP3
	71188486	71288486	2	ENSBTAG00000009517/ENSBTAG00000026825	DBI/TMEM37
	98440521	98540521	2	ENSBTAG00000016662	CPS1
	119756852	119856852	2	ENSBTAG00000011964	DIS3L2
	128897842	128997842	2	ENSBTAG00000008072	SRSF10
	132871343	132971343	2	ENSBTAG00000030367/ENSBTAG00000007998	RNF186/TMCO4
	1082726	1182726	3	ENSBTAG00000008931	CREG1
	9672400	9772400	3	ENSBTAG00000007241/ENSBTAG00000001481/ENSBTAG00000002068/ENSBTAG00000044526	SLAMF9/IGSF9/TAGLN2/bta-mir-1584
	21321931	21421931	3	ENSBTAG00000050444/ENSBTAG00000021823/ENSBTAG00000020060/ENSBTAG00000008365/ENSBTAG00000008369	U1/HJV/TXNIP/ANKRD34A/RBM8A
	35735053	35835053	3	ENSBTAG00000031575	VAV3
	40213643	40313643	3	ENSBTAG00000021217	COL11A1
	42353309	42453309	3	ENSBTAG00000019026	EXTL2
	46036314	46136314	3	ENSBTAG00000031358	DPYD
	48911484	49011484	3	ENSBTAG00000007101	F3
	49494712	49594712	3	ENSBTAG00000018010/ENSBTAG00000007842	ABCA4/GCLM
	49631867	49731867	3	ENSBTAG00000003245	BCAR3
	57629768	57729768	3	ENSBTAG00000012907	ODF2L
	65693652	65793652	3	ENSBTAG00000019733	ADGRL4
	67394200	67494200	3	ENSBTAG00000031012	PIGK
	74869850	74969850	3	ENSBTAG00000015482	ANKRD13C
	77909050	78009050	3	ENSBTAG00000012957	SERBP1
	82110715	82210715	3	ENSBTAG00000030710	ITGB3BP
	88900716	89000716	3	ENSBTAG00000013802	DAB1
	93357420	93457420	3	ENSBTAG00000002910	ECHDC2
	93797303	93897303	3	ENSBTAG00000002721	TUT4
	98954471	99054471	3	ENSBTAG00000017844/ENSBTAG00000043793/ENSBTAG00000005029/ENSBTAG00000002555	STIL/5S_rRNA/TAL1/PDZK1IP1
	99981161	100081161	3	ENSBTAG00000002979	PIK3R3
	100761809	100861809	3	ENSBTAG00000012648	ZSWIM5
	105807594	105907594	3	ENSBTAG00000020622	COL9A2
	108986828	109086828	3	ENSBTAG00000009269	GRIK3
	110243079	110343079	3	ENSBTAG00000016694	KIAA0319L
	112366215	112466215	3	ENSBTAG00000014596/ENSBTAG00000014079	EFHD1/GIGYF2
	4514219	4614219	4	ENSBTAG00000023806	COBL
	9787443	9887443	4	ENSBTAG00000018363	RBM48
	12018919	12118919	4	ENSBTAG00000053735	PEG10
	15790497	15890497	4	ENSBTAG00000047004	UMAD1
	35366336	35466336	4	ENSBTAG00000024394	SEMA3D
	45527225	45627225	4	ENSBTAG00000000189	LHFPL3
	46155276	46255276	4	ENSBTAG00000009207	KMT2E
	59840861	59940861	4	ENSBTAG00000003490	ELMO1
	61768594	61868594	4	ENSBTAG00000017541/ENSBTAG00000032650	TBX20/DPY19L2
	66272307	66372307	4	ENSBTAG00000007870/ENSBTAG00000016223	FKBP14/SCRN1
	76474685	76574685	4	ENSBTAG00000010504/ENSBTAG00000043398/ENSBTAG00000043541	TBRG4/SNORA5C/SNORA5A
	82500244	82600244	4	ENSBTAG00000031967	AMPH
	102135505	102235505	4	ENSBTAG00000002431	TRIM24
	103202542	103302542	4	ENSBTAG00000020225	TBXAS1
	117195533	117295533	4	ENSBTAG00000018917	EN2
	2305951	2405951	5	ENSBTAG00000018575	TRHDE
	23097391	23197391	5	ENSBTAG00000007447	NUDT4
	60803160	60903160	5	ENSBTAG00000015792	CFAP54
	65693920	65793920	5	ENSBTAG00000017287	DRAM1
	71070972	71170972	5	ENSBTAG00000020634	FBXO7
	76289294	76389294	5	ENSBTAG00000000606	SYT10
	83395048	83495048	5	ENSBTAG00000002313	ITPR2
	108850624	108950624	5	ENSBTAG00000009704	CECR2
	112444968	112544968	5	ENSBTAG00000002782/ENSBTAG00000016580	ZC3H7B/TEF
	112895811	112995811	5	ENSBTAG00000013173/ENSBTAG00000013174	SEPTIN3/WBP2NL
	113864967	113964967	5	ENSBTAG00000018073	TSPO
	115583531	115683531	5	ENSBTAG00000017652	NUP50
	116059703	116159703	5	ENSBTAG00000009351	ATXN10
	7357786	7457786	6	ENSBTAG00000051854	6
	17044708	17144708	6	ENSBTAG00000006844	LEF1
	24134712	24234712	6	ENSBTAG00000034206	EMCN
	61210690	61310690	6	ENSBTAG00000049215	SHISA3
	85904909	86004909	6	ENSBTAG00000002928/ENSBTAG00000004793/ENSBTAG00000010346	AMTN/AMBN/ENAM
	88436150	88536150	6	ENSBTAG00000017121/ENSBTAG00000017131	ALB/AFP
	88497858	88597858	6	ENSBTAG00000017121/ENSBTAG00000017131/ENSBTAG00000047833	ALB/AFP/AFM
	100824084	100924084	6	ENSBTAG00000003959	ARHGAP24
	101722602	101822602	6	ENSBTAG00000014947	PTPN13
	103006415	103106415	6	ENSBTAG00000011170	JAKMIP1
	115763300	115863300	6	ENSBTAG00000001504/ENSBTAG00000021130	NOP14/MFSD10
	16996540	17096540	7	ENSBTAG00000002473/ENSBTAG00000002475/ENSBTAG00000021036/ENSBTAG00000021039	ANGPTL4/RAB11B/MARCHF2/HNRNPM
	40340527	40440527	7	ENSBTAG00000019646	TRIM41
	43309066	43409066	7	ENSBTAG00000019771/ENSBTAG00000020269/ENSBTAG00000045828/ENSBTAG00000045829/ENSBTAG00000046105	PALM/MISP/PTBP1/AZU1/PRTN3
	54001562	54101562	7	ENSBTAG00000027151	ARHGAP26
	57218891	57318891	7	ENSBTAG00000006762/ENSBTAG00000006762	SH3RF2/SH3RF2
	64842251	64942251	7	ENSBTAG00000005800	GRIA1
	69255308	69355308	7	ENSBTAG00000010359/ENSBTAG00000010363	THG1L/LSM11
	73625794	73725794	7	ENSBTAG00000030286	GABRA1
	82948908	83048908	7	ENSBTAG00000024275	XRCC4
	89956186	90056186	7	ENSBTAG00000044077	POLR3G
	927328	1027328	8	ENSBTAG00000001081	PALLD
	4601419	4701419	8	ENSBTAG00000035007	GALNTL6
	7405047	7505047	8	ENSBTAG00000054255/ENSBTAG00000051632	DEFB134/DEFB136
	9756663	9856663	8	ENSBTAG00000008845	INTS9
	11428184	11528184	8	ENSBTAG00000005907/ENSBTAG00000005905	NDUFB6/TOPORS
	28781847	28881847	8	ENSBTAG00000007872	PSIP1
	48061618	48161618	8	ENSBTAG00000006831	C8H9orf85
	53020787	53120787	8	ENSBTAG00000032983	FOXB2
	75709261	75809261	8	ENSBTAG00000031793	NUDT2
	85736900	85836900	8	ENSBTAG00000002220	SPTLC1
	86006611	86106611	8	ENSBTAG00000005092	ROR2
	105260237	105360237	8	ENSBTAG00000004010	PAPPA
	112076203	112176203	8	ENSBTAG00000003540/ENSBTAG00000050986	MYT1L/PXDN
	15199126	15299126	9	ENSBTAG00000005869	SENP6
	19846087	19946087	9	ENSBTAG00000012096	BCKDHB
	23735037	23835037	9	ENSBTAG00000003919	KIAA0408
	50229445	50329445	9	ENSBTAG00000015744/ENSBTAG00000018528	CCNC/USP45
	58597319	58697319	9	ENSBTAG00000043746	7SK
	63789779	63889779	9	ENSBTAG00000006672/ENSBTAG00000018408	SYNCRIP/SNX14
	65153849	65253849	9	ENSBTAG00000003384	CEP162
	73872020	73972020	9	ENSBTAG00000015888	PDE7B
	80584085	80684085	9	ENSBTAG00000003496	AIG1
	82007649	82107649	9	ENSBTAG00000009665	UTRN
	87328346	87428346	9	ENSBTAG00000026586	PPP1R14C
	87447282	87547282	9	ENSBTAG00000015935	IYD
	88398285	88498285	9	ENSBTAG00000014788/ENSBTAG00000044223/ENSBTAG00000004098	AKAP12/bta-mir-2285e-2/ARMT1
	94053850	94153850	9	ENSBTAG00000018464	ZDHHC14
	8040259	8140259	10	ENSBTAG00000020201/ENSBTAG00000020202	S100Z/CRHBP
	19316262	19416262	10	ENSBTAG00000025814/ENSBTAG00000006708	TMEM202/ARIH1
	19874813	19974813	10	ENSBTAG00000004990	NEO1
	36896284	36996284	10	ENSBTAG00000001671/ENSBTAG00000001675/ENSBTAG00000001694	RTF1/ITPKA/TYRO3
	45238657	45338657	10	ENSBTAG00000007638/ENSBTAG00000011037	PIF1/RBPMS2
	46101655	46201655	10	ENSBTAG00000053677	HERC1
	46679918	46779918	10	ENSBTAG00000019390	CA12
	48963809	49063809	10	ENSBTAG00000015904	RORA
	56654765	56754765	10	ENSBTAG00000021876	WDR72
	57814897	57914897	10	ENSBTAG00000011022/ENSBTAG00000006489	ARPP19/MYO5A
	57896593	57996593	10	ENSBTAG00000006489	MYO5A
	59047419	59147419	10	ENSBTAG00000014890	CYP19A1
	59355502	59455502	10	ENSBTAG00000010472	TNFAIP8L3
	83989652	84089652	10	ENSBTAG00000014189	RGS6
	84374782	84474782	10	ENSBTAG00000008713	DCAF4
	101972247	102072247	10	ENSBTAG00000025644	CALM1
	2058830	2158830	11	ENSBTAG00000017955/ENSBTAG00000011553	KCNIP3/FAHD2A
	5880204	5980204	11	ENSBTAG00000019697	NPAS2
	16080458	16180458	11	ENSBTAG00000008006	RASGRP3
	18817395	18917395	11	ENSBTAG00000009020	CRIM1
	28479964	28579964	11	ENSBTAG00000020614	PRKCE
	49533187	49633187	11	ENSBTAG00000005432	CAPG
	66924370	67024370	11	ENSBTAG00000018401/ENSBTAG00000050333	APLF/PROKR1
	70084982	70184982	11	ENSBTAG00000007379	ALK
	98114828	98214828	11	ENSBTAG00000006948/ENSBTAG00000006957/ENSBTAG00000023885/ENSBTAG00000012844	GARNL3/SLC2A8/ZNF79/LRSAM1
	99556533	99656533	11	ENSBTAG00000001933/ENSBTAG00000052455	PTPA/bta-mir-12056
	100038368	100138368	11	ENSBTAG00000002936	PRRX2
	105341422	105441422	11	ENSBTAG00000047998	COL5A1
	106691315	106791315	11	ENSBTAG00000007882	CACNA1B
	11603787	11703787	12	ENSBTAG00000034885	RGCC
	15676574	15776574	12	ENSBTAG00000018580	CBY2
	21265343	21365343	12	ENSBTAG00000019863	CCDC70
	30312194	30412194	12	ENSBTAG00000018103	HMGB1
	33166722	33266722	12	ENSBTAG00000005318	RNF6
	65973325	66073325	12	ENSBTAG00000008708	GPC5
	77942661	78042661	12	ENSBTAG00000044027	ITGBL1
	1427972	1527972	13	ENSBTAG00000008338	PLCB1
	9812273	9912273	13	ENSBTAG00000034441	MACROD2
	12758180	12858180	13	ENSBTAG00000019488	USP6NL
	26396051	26496051	13	ENSBTAG00000002123	MYO3A
	67094437	67194437	13	ENSBTAG00000014046	BPI
	75508137	75608137	13	ENSBTAG00000013336	EYA2
	8551115	8651115	14	ENSBTAG00000017138/ENSBTAG00000010548	TMEM71/LRRC6
	9883344	9983344	14	ENSBTAG00000014600	ADCY8
	32103693	32203693	14	ENSBTAG00000022169	PREX2
	45287333	45387333	14	ENSBTAG00000007423	TNFRSF11B
	45966583	46066583	14	ENSBTAG00000043996	SAMD12
	56891551	56991551	14	ENSBTAG00000014051	ANGPT1
	1442400	1542400	15	ENSBTAG00000009176	ANKRD49
	15992857	16092857	15	ENSBTAG00000018629	CWF19L2
	17608204	17708204	15	ENSBTAG00000012882	CUL5
	24597064	24697064	15	ENSBTAG00000011266	ZBTB16
	29183683	29283683	15	ENSBTAG00000018093/ENSBTAG00000012940/ENSBTAG00000006690/ENSBTAG00000016197	KMT2A/TMEM25/ARCN1/PHLDB1
	33343282	33443282	15	ENSBTAG00000000842	UBASH3B
	35202207	35302207	15	ENSBTAG00000004901	PIK3C2A
	37843014	37943014	15	ENSBTAG00000010419	CYP2R1
	38415773	38515773	15	ENSBTAG00000011905	RRAS2
	58725396	58825396	15	ENSBTAG00000003361	METTL15
	65205763	65305763	15	ENSBTAG00000017150	EHF
	4135662	4235662	16	ENSBTAG00000001483	SRGAP2
	4416778	4516778	16	ENSBTAG00000013294/ENSBTAG00000038107	DYRK3/MAPKAPK2
	15312423	15412423	16	ENSBTAG00000008420	BRINP3
	26050450	26150450	16	ENSBTAG00000018824	MIA3
	47116105	47216105	16	ENSBTAG00000048308/ENSBTAG00000040477	ICMT/CHD5
	50961081	51061081	16	ENSBTAG00000031749/ENSBTAG00000010737/ENSBTAG00000047755/ENSBTAG00000002575	SLC35E2/CDK11B/FNDC10/SSU72
	57625039	57725039	16	ENSBTAG00000018303	PAPPA2
	59563869	59663869	16	ENSBTAG00000054408/ENSBTAG00000015537	bta-mir-2285x/RASAL2
	70856202	70956202	16	ENSBTAG00000011982	BATF3
	72583056	72683056	16	ENSBTAG00000008710/ENSBTAG00000053350	KCNH1/U6
	76261292	76361292	16	ENSBTAG00000008944	CRB1
	77513834	77613834	16	ENSBTAG00000023144	PTPRC
	3049005	3149005	17	ENSBTAG00000024545	DCHS2
	18524363	18624363	17	ENSBTAG00000020594	ELF2
	35179850	35279850	17	ENSBTAG00000020883	IL2
	44190753	44290753	17	ENSBTAG00000040336/ENSBTAG00000006753	ZNF268/MBD3L1
	52728195	52828195	17	ENSBTAG00000000908	HCAR1
	53705199	53805199	17	ENSBTAG00000002328	KDM2B
	53917748	54017748	17	ENSBTAG00000010815	CAMKK2
	54808337	54908337	17	ENSBTAG00000008571	CUX2
	65841668	65941668	17	ENSBTAG00000006569	SEZ6L
	68652128	68752128	17	ENSBTAG00000013147	NEFH
	70015396	70115396	17	ENSBTAG00000002828/ENSBTAG00000010662	RNF185/LIMK2
	4936492	5036492	18	ENSBTAG00000007184/ENSBTAG00000018146	NUDT7/VAT1L
	5495560	5595560	18	ENSBTAG00000015894/ENSBTAG00000052533	WWOX/bta-mir-2285al
	8450285	8550285	18	ENSBTAG00000002103/ENSBTAG00000045367	PLCG2/SNORA70
	11602352	11702352	18	ENSBTAG00000009918	GSE1
	14576788	14676788	18	ENSBTAG00000001904/ENSBTAG00000040356	ZNF276/SPIRE2
	15881700	15981700	18	ENSBTAG00000004806	PHKB
	21584314	21684314	18	ENSBTAG00000002287	CHD9
	23146347	23246347	18	ENSBTAG00000004838	IRX5
	23791383	23891383	18	ENSBTAG00000019272/ENSBTAG00000003353	LPCAT2/SLC6A2
	23916401	24016401	18	ENSBTAG00000003353/ENSBTAG00000011021	SLC6A2/CES1
	36544231	36644231	18	ENSBTAG00000002412	CYB5B
	43316348	43416348	18	ENSBTAG00000010403	FAAP24
	43616425	43716425	18	ENSBTAG00000047062	LRP3
	48244173	48344173	18	ENSBTAG00000006999	RYR1
	51319666	51419666	18	ENSBTAG00000020251	LYPD4
	52528174	52628174	18	ENSBTAG00000009493/ENSBTAG00000009494/ENSBTAG00000009495/ENSBTAG00000015318/ENSBTAG00000001781	BCL3/CBLC/BCAM/NECTIN2/TOMM40
	53082012	53182012	18	ENSBTAG00000014187/ENSBTAG00000019604	PPM1N/VASP
	54506209	54606209	18	ENSBTAG00000004138	BICRA
	55615518	55715518	18	ENSBTAG00000001996/ENSBTAG00000023415/ENSBTAG00000002844/ENSBTAG00000006139	SNRNP70/LIN7B/PPFIA3/TRPM4
	61547742	61647742	18	ENSBTAG00000018152/ENSBTAG00000013550/ENSBTAG00000007506/ENSBTAG00000007509	MYADM/PRKCG/CACNG7/CACNG8
	13407401	13507401	19	ENSBTAG00000021927	AATF
	17445652	17545652	19	ENSBTAG00000015527	MYO1D
	23427516	23527516	19	ENSBTAG00000016806	PAFAH1B1
	24351822	24451822	19	ENSBTAG00000000831/ENSBTAG00000025121/ENSBTAG00000032372	CTNS/EMC6/HASPIN
	26188708	26288708	19	ENSBTAG00000055017	SCIMP
	26532764	26632764	19	ENSBTAG00000045946/ENSBTAG00000031998/ENSBTAG00000018315	VMO1/CXCL16/PELP1
	40312520	40412520	19	ENSBTAG00000021461/ENSBTAG00000021462/ENSBTAG00000010745	PSMD3/CSF3/THRA
	48938244	49038244	19	ENSBTAG00000053910	C17orf58
	6649756	6749756	20	ENSBTAG00000016002	FAM169A
	18324772	18424772	20	ENSBTAG00000021606	ERCC8
	18487789	18587789	20	ENSBTAG00000007704/ENSBTAG00000017026	ELOVL7/DEPDC1B
	23543803	23643803	20	ENSBTAG00000010526	PLPP1
	35838849	35938849	20	ENSBTAG00000010423	LIFR
	38967985	39067985	20	ENSBTAG00000025035	PRLR
	48979369	49079369	20	ENSBTAG00000002845	CDH10
	63524559	63624559	20	ENSBTAG00000032508	TAS2R1
	6228164	6328164	21	ENSBTAG00000006987	CERS3
	22640957	22740957	21	ENSBTAG00000015909	PDE8A
	30174238	30274238	21	ENSBTAG00000006868	OTUD7A
	34115847	34215847	21	ENSBTAG00000000010	UBL7
	34193875	34293875	21	ENSBTAG00000000010/ENSBTAG00000011446	UBL7/SEMA7A
	43046903	43146903	21	ENSBTAG00000017719	AKAP6
	58196444	58296444	21	ENSBTAG00000008017	UNC79
	61569393	61669393	21	ENSBTAG00000014230	VRK1
	68078825	68178825	21	ENSBTAG00000013410/ENSBTAG00000031327	MARK3/TRMT61A
	4137696	4237696	22	ENSBTAG00000044062/ENSBTAG00000049450	RBMS3/bta-mir-11990
	12622556	12722556	22	ENSBTAG00000015483/ENSBTAG00000022721/ENSBTAG00000009757/ENSBTAG00000042226	CCR8/SLC25A38/RPSA/SNORA62
	14561272	14661272	22	ENSBTAG00000006567	VIPR1
	23195545	23295545	22	ENSBTAG00000000273	IL5RA
	35065756	35165756	22	ENSBTAG00000010360	LRIG1
	41235179	41335179	22	ENSBTAG00000014418	FHIT
	52690764	52790764	22	ENSBTAG00000031447	PRSS45
	56553472	56653472	22	ENSBTAG00000024991	MKRN2OS
	58667546	58767546	22	ENSBTAG00000003237	IQSEC1
	8948867	9048867	23	ENSBTAG00000016890	ANKS1A
	10096619	10196619	23	ENSBTAG00000013316/ENSBTAG00000015118	BRPF3/PNPLA1
	19934055	20034055	23	ENSBTAG00000047009/ENSBTAG00000004345	ANKRD66/MEP1A
	28257706	28357706	23	ENSBTAG00000011358/ENSBTAG00000009960/ENSBTAG00000025526/ENSBTAG00000006966/ENSBTAG00000039695/ENSBTAG00000006960	IER3/FLOT1/MDC1/NRM/PPP1R18/DHX16
	5279775	5379775	24	ENSBTAG00000005985	CBLN2
	26102512	26202512	24	ENSBTAG00000015238	DSC3
	29637635	29737635	24	ENSBTAG00000014082	CHST9
	36913842	37013842	24	ENSBTAG00000003354	SMCHD1
	48151319	48251319	24	ENSBTAG00000018901	CTIF
	56205881	56305881	24	ENSBTAG00000004005	WDR7
	123462	223462	25	ENSBTAG00000026422/ENSBTAG00000038757/ENSBTAG00000051412/ENSBTAG00000016567	MPG/HBM/HBA/HBQ1
	4060250	4160250	25	ENSBTAG00000002189	ALG1
	10636085	10736085	25	ENSBTAG00000049285/ENSBTAG00000026371	TNFRSF17/SNX29
	15577982	15677982	25	ENSBTAG00000005523	XYLT1
	28856785	28956785	25	ENSBTAG00000043969	CALN1
	33753849	33853849	25	ENSBTAG00000005798/ENSBTAG00000017941	TRIM50/NSUN5
	35482374	35582374	25	ENSBTAG00000000342/ENSBTAG00000047808/ENSBTAG00000009868	PLOD3/MOGAT3/VGF
	36853786	36953786	25	ENSBTAG00000051481/ENSBTAG00000047572/ENSBTAG00000016190/ENSBTAG00000002094	FAM200A/ZNF789/ZNF394/ATP5MF
	40063297	40163297	25	ENSBTAG00000052780	bta-mir-2390
	40812647	40912647	25	ENSBTAG00000052079	bta-mir-12019
	4731510	4831510	26	ENSBTAG00000045905	PCDH15
	13028410	13128410	26	ENSBTAG00000011651	HECTD2
	24457253	24557253	26	ENSBTAG00000001017	SLK
	34750551	34850551	26	ENSBTAG00000006860	VWA2
	35277341	35377341	26	ENSBTAG00000003062	FAM160B1
	46316100	46416100	26	ENSBTAG00000031890	DOCK1
	48894472	48994472	26	ENSBTAG00000050386	MGMT
	8453527	8553527	27	ENSBTAG00000005825	NEIL3
	26187978	26287978	27	ENSBTAG00000013581	LEPROTL1
	32231266	32331266	27	ENSBTAG00000027118	KCNU1
	37611635	37711635	27	ENSBTAG00000007634/ENSBTAG00000003201	HOOK3/FNTA
	41415055	41515055	27	ENSBTAG00000017802	THRB
	6998297	7098297	28	ENSBTAG00000020361	SLC35F3
	8169490	8269490	28	ENSBTAG00000013735	TBCE
	12835550	12935550	28	ENSBTAG00000051862	ZNF37A
	42724413	42824413	28	ENSBTAG00000007876	MAPK8
	9771985	9871985	29	ENSBTAG00000000460/ENSBTAG00000000457	SYTL2/CCDC89
	11681537	11781537	29	ENSBTAG00000027868	DLG2
	12611834	12711834	29	ENSBTAG00000002417	RAB30
	25604866	25704866	29	ENSBTAG00000017446	E2F8
	26023034	26123034	29	ENSBTAG00000020257/ENSBTAG00000001660	PTPN5/SPTY2D1
	41778108	41878108	29	ENSBTAG00000007108	LGALS12
	48451273	48551273	29	ENSBTAG00000001077	OSBPL5
FST2
HEAT	5560335	5660335	1	ENSBTAG00000052202	KRTAP27-1
	44872334	44972334	1	ENSBTAG00000004459	TMEM45A
	56455444	56555444	1	ENSBTAG00000012646/ENSBTAG00000001209	PLCXD2/PHLDB2
	63981787	64081787	1	ENSBTAG00000009014	UPK1B
	67110040	67210040	1	ENSBTAG00000005071	SLC49A4
	68303295	68403295	1	ENSBTAG00000044700	U4
	68887163	68987163	1	ENSBTAG00000002640	KALRN
	71020958	71120958	1	ENSBTAG00000006388	FBXO45
	71970602	72070602	1	ENSBTAG00000023600	APOD
	72002010	72102010	1	ENSBTAG00000023600/ENSBTAG00000006724	APOD/PPP1R2
	72912249	73012249	1	ENSBTAG00000002394	TMEM44
	73874347	73974347	1	ENSBTAG00000016305/ENSBTAG00000054354	ATP13A4/bta-mir-2285bk
	75121303	75221303	1	ENSBTAG00000012413	FGF12
	79969442	80069442	1	ENSBTAG00000012467	MASP1
	80377462	80477462	1	ENSBTAG00000014727	RFC4
	81323204	81423204	1	ENSBTAG00000007666	IGF2BP2
	89975134	90075134	1	ENSBTAG00000021910	TBL1XR1
	109418586	109518586	1	ENSBTAG00000005230	SHOX2
	141853958	141953958	1	ENSBTAG00000046015
	146081914	146181914	1	ENSBTAG00000030670/ENSBTAG00000011495	PCNT/DIP2A
	146471361	146571361	1	ENSBTAG00000007039	FBXO25
	149229017	149329017	1	ENSBTAG00000008167	TTC3
	18358562	18458562	2	ENSBTAG00000001097/ENSBTAG00000001096	FKBP7/PRKRA
	18755875	18855875	2	ENSBTAG00000039522/ENSBTAG00000016396	CYCT/PDE11A
	26947623	27047623	2	ENSBTAG00000004555	LRP2
	27865549	27965549	2	ENSBTAG00000017162	STK39
	30018409	30118409	2	ENSBTAG00000002425	SCN9A
	56359074	56459074	2	ENSBTAG00000024632	LRP1B
	61561083	61661083	2	ENSBTAG00000015170	LCT
	71582662	71682662	2	ENSBTAG00000020855	PTPN4
	76285841	76385841	2	ENSBTAG00000031898	CNTNAP5
	107328666	107428666	2	ENSBTAG00000005353/ENSBTAG00000046176	DES/SPEG
	115970436	116070436	2	ENSBTAG00000021327	DAW1
	119400394	119500394	2	ENSBTAG00000002549	PTMA
	120925500	121025500	2	ENSBTAG00000026684/ENSBTAG00000027159	SYNC/ZBTB8OS
	126076854	126176854	2	ENSBTAG00000008766	SLC9A1
	129627633	129727633	2	ENSBTAG00000040329/ENSBTAG00000009502	HTR1D/LUZP1
	131489751	131589751	2	ENSBTAG00000040215	EIF4G3
	29689497	29789497	3	ENSBTAG00000019615	PHTF1
	35735053	35835053	3	ENSBTAG00000031575	VAV3
	49653647	49753647	3	ENSBTAG00000003245	BCAR3
	51550304	51650304	3	ENSBTAG00000024269	TGFBR3
	72985441	73085441	3	ENSBTAG00000055278	NEGR1
	76677514	76777514	3	ENSBTAG00000001343	DEPDC1
	77437187	77537187	3	ENSBTAG00000054533	GNG12
	78151865	78251865	3	ENSBTAG00000030809	C3H1orf141
	78333390	78433390	3	ENSBTAG00000005442	WDR78
	89048773	89148773	3	ENSBTAG00000013802	DAB1
	97711756	97811756	3	ENSBTAG00000012722/ENSBTAG00000003128	3/SPATA6
	98928974	99028974	3	ENSBTAG00000017844/ENSBTAG00000043793/ENSBTAG00000052144/ENSBTAG00000005029/ENSBTAG00000002555	STIL/5S_rRNA/U6/TAL1/PDZK1IP1
	98985709	99085709	3	ENSBTAG00000017844/ENSBTAG00000005029/ENSBTAG00000002555	STIL/TAL1/PDZK1IP1
	99449215	99549215	3	ENSBTAG00000000097/ENSBTAG00000000094/ENSBTAG00000023551/ENSBTAG00000019933	EFCAB14/ATPAF1/MOB3C/MKNK1
	99475326	99575326	3	ENSBTAG00000000094/ENSBTAG00000023551/ENSBTAG00000019933	ATPAF1/MOB3C/MKNK1
	103308134	103408134	3	ENSBTAG00000009617	SLC2A1
	105712348	105812348	3	ENSBTAG00000020622	COL9A2
	109652946	109752946	3	ENSBTAG00000005732/ENSBTAG00000010175	TRAPPC3/COL8A2
	110192807	110292807	3	ENSBTAG00000016694	KIAA0319L
	33582992	33682992	4	ENSBTAG00000004023	KIAA1324L
	38991063	39091063	4	ENSBTAG00000017664	HGF
	40016281	40116281	4	ENSBTAG00000006138	SEMA3C
	44455761	44555761	4	ENSBTAG00000006876	PMPCB
	48565363	48665363	4	ENSBTAG00000021849	DUS4L
	48638283	48738283	4	ENSBTAG00000021849/ENSBTAG00000010062	DUS4L/SLC26A4
	50367818	50467818	4	ENSBTAG00000021469	CTTNBP2
	57035138	57135138	4	ENSBTAG00000004398	IMMP2L
	65796954	65896954	4	ENSBTAG00000010597/ENSBTAG00000038235	GGCT/NOD1
	76689601	76789601	4	ENSBTAG00000016975	H2AFV
	86094034	86194034	4	ENSBTAG00000044925	7SK
	106333456	106433456	4	ENSBTAG00000013130	OR6V1
	107572906	107672906	4	ENSBTAG00000001815	ARHGEF5
	10016097	10116097	5	ENSBTAG00000026977	PTPRQ
	22549252	22649252	5	ENSBTAG00000000818	PLEKHG7
	30064907	30164907	5	ENSBTAG00000004851/ENSBTAG00000045023/ENSBTAG00000016593	NCKAP5L/bta-mir-2425/FMNL3
	31196762	31296762	5	ENSBTAG00000005859	LALBA
	32170261	32270261	5	ENSBTAG00000012423	SENP1
	33952538	34052538	5	ENSBTAG00000000859	SLC38A1
	55939100	56039100	5	ENSBTAG00000010624/ENSBTAG00000031544/ENSBTAG00000018403	DCTN2/DDIT3/ARHGAP9
	68215188	68315188	5	ENSBTAG00000010644	CHST11
	88309142	88409142	5	ENSBTAG00000019294	ABCC9
	96116308	96216308	5	ENSBTAG00000000219	GRIN2B
	100089180	100189180	5	ENSBTAG00000049573	bta-mir-12002b
	108850624	108950624	5	ENSBTAG00000009704	CECR2
	115173183	115273183	5	ENSBTAG00000039784	PRR5
	115717786	115817786	5	ENSBTAG00000010590	FAM118A
	116755792	116855792	5	ENSBTAG00000021803	GRAMD4
	118380785	118480785	5	ENSBTAG00000022986	TAFA5
	119630682	119730682	5	ENSBTAG00000018660	PPP6R2
	11766127	11866127	6	ENSBTAG00000014463	CAMK2D
	19434533	19534533	6	ENSBTAG00000033648	INTS12
	42244971	42344971	6	ENSBTAG00000020363	GBA3
	49996827	50096827	6	ENSBTAG00000000061	PCDH7
	60869136	60969136	6	ENSBTAG00000020367	SLC30A9
	61381768	61481768	6	ENSBTAG00000055038	bta-mir-2285cs
	89294775	89394775	6	ENSBTAG00000010273/ENSBTAG00000018134	EREG/AREG
	93247733	93347733	6	ENSBTAG00000010716/ENSBTAG00000010153	FRAS1/ANXA3
	93436356	93536356	6	ENSBTAG00000001126	BMP2K
	102317174	102417174	6	ENSBTAG00000011354	NUDT9
	103282668	103382668	6	ENSBTAG00000004292	CRMP1
	104105995	104205995	6	ENSBTAG00000011163	CYTL1
	110215558	110315558	6	ENSBTAG00000019847	CPEB2
	110402991	110502991	6	ENSBTAG00000010343	C1QTNF7
	115368517	115468517	6	ENSBTAG00000000073	LRPAP1
	116629161	116729161	6	ENSBTAG00000017921	NELFA
	21795280	21895280	7	ENSBTAG00000031235	IL5
	38947984	39047984	7	ENSBTAG00000011398	PRR7
	39037132	39137132	7	ENSBTAG00000001394/ENSBTAG00000001767	TMED9/B4GALT7
	61146630	61246630	7	ENSBTAG00000012943	PPARGC1B
	65329758	65429758	7	ENSBTAG00000017079	MFAP3
	81860678	81960678	7	ENSBTAG00000038117	ATG10
	86929103	87029103	7	ENSBTAG00000009565	RASA1
	90512983	90612983	7	ENSBTAG00000006031	ADGRV1
	521625	621625	8	ENSBTAG00000004944	ANXA10
	4496756	4596756	8	ENSBTAG00000035007	GALNTL6
	24657157	24757157	8	ENSBTAG00000043972	SLC24A2
	44881986	44981986	8	ENSBTAG00000009917/ENSBTAG00000021586	PIP5K1B/FAM122A
	46418733	46518733	8	ENSBTAG00000018437	SMC5
	55668826	55768826	8	ENSBTAG00000003532	TLE4
	61214051	61314051	8	ENSBTAG00000025859	ZCCHC7
	61589671	61689671	8	ENSBTAG00000012243	POLR1E
	61666855	61766855	8	ENSBTAG00000046574	FRMPD1
	62464917	62564917	8	ENSBTAG00000015378	CCDC180
	65910156	66010156	8	ENSBTAG00000006446	CNTNAP3
	99477627	99577627	8	ENSBTAG00000014471	PALM2
	103716102	103816102	8	ENSBTAG00000000203/ENSBTAG00000000204	ATP6V1G1/TMEM268
	112036855	112136855	8	ENSBTAG00000003540/ENSBTAG00000050986	MYT1L/PXDN
	544116	644116	9	ENSBTAG00000019139	PHF3
	9813084	9913084	9	ENSBTAG00000038190	SMAP1
	12474552	12574552	9	ENSBTAG00000007791	KCNQ5
	25959951	26059951	9	ENSBTAG00000003340/ENSBTAG00000044951	HDDC2/bta-mir-2477
	32100229	32200229	9	ENSBTAG00000002059	MCM9
	60706087	60806087	9	ENSBTAG00000018438	RRAGD
	98826440	98926440	9	ENSBTAG00000011593	QKI
	31685444	31785444	10	ENSBTAG00000043636	U2
	51083677	51183677	10	ENSBTAG00000021538	MYO1E
	77013059	77113059	10	ENSBTAG00000003469/ENSBTAG00000005897	CHURC1/FNTB
	82240325	82340325	10	ENSBTAG00000045604	TTC9
	86076108	86176108	10	ENSBTAG00000008287/ENSBTAG00000006463	YLPM1/DLST
	87505282	87605282	10	ENSBTAG00000003084	GPATCH2L
	6798710	6898710	11	ENSBTAG00000005273	IL1R1
	6952282	7052282	11	ENSBTAG00000005704	IL1RL2
	7410663	7510663	11	ENSBTAG00000001706/ENSBTAG00000038462	SLC9A2/TMEM182
	11439680	11539680	11	ENSBTAG00000050078	SFXN5
	11612712	11712712	11	ENSBTAG00000020799	EXOC6B
	13943403	14043403	11	ENSBTAG00000000783	TGFA
	15449838	15549838	11	ENSBTAG00000019839	LTBP1
	19166632	19266632	11	ENSBTAG00000024980	VIT
	24944130	25044130	11	ENSBTAG00000004073	MTA3
	28552889	28652889	11	ENSBTAG00000020614	PRKCE
	46566761	46666761	11	ENSBTAG00000013675	IL37
	105321400	105421400	11	ENSBTAG00000047998	COL5A1
	106258481	106358481	11	ENSBTAG00000052518/ENSBTAG00000021861/ENSBTAG00000023787	TUBB4B/NELFB/TOR4A
	2337957	2437957	12	ENSBTAG00000012443	DIAPH3
	14076668	14176668	12	ENSBTAG00000016691	LACC1
	27694034	27794034	12	ENSBTAG00000021815	STARD13
	35506098	35606098	12	ENSBTAG00000015943/ENSBTAG00000006177/ENSBTAG00000003314	MICU2/ZDHHC20/SKA3
	62257557	62357557	12	ENSBTAG00000010129	SLITRK5
	78872242	78972242	12	ENSBTAG00000020389	TPP2
	84130733	84230733	12	ENSBTAG00000018237	MYO16
	1141877	1241877	13	ENSBTAG00000008338	PLCB1
	21313395	21413395	13	ENSBTAG00000009475	PLXDC2
	52015761	52115761	13	ENSBTAG00000020454/ENSBTAG00000015379/ENSBTAG00000051021/ENSBTAG00000008027	LZTS3/UBOX5/FASTKD5/AVP
	72685116	72785116	13	ENSBTAG00000002593/ENSBTAG00000013220	GDAP1L1/R3HDML
	74059992	74159992	13	ENSBTAG00000018122/ENSBTAG00000013950	TKDP1/TKDP4
	75306494	75406494	13	ENSBTAG00000002942	SLC2A10
	77269144	77369144	13	ENSBTAG00000006671	DDX27
	1904317	2004317	14	ENSBTAG00000009974	TSNARE1
	2803845	2903845	14	ENSBTAG00000009578	PTK2
	3168998	3268998	14	ENSBTAG00000013955	TRAPPC9
	8648150	8748150	14	ENSBTAG00000010548/ENSBTAG00000020667	LRRC6/KCNQ3
	8801361	8901361	14	ENSBTAG00000020667	KCNQ3
	8956630	9056630	14	ENSBTAG00000020667/ENSBTAG00000034196	KCNQ3/HHLA1
	9827646	9927646	14	ENSBTAG00000014600	ADCY8
	38240355	38340355	14	ENSBTAG00000004411	CRISPLD1
	48808864	48908864	14	ENSBTAG00000017694	TRPS1
	51276877	51376877	14	ENSBTAG00000038281	CSMD3
	61018246	61118246	14	ENSBTAG00000033902	SLC25A32
	62701254	62801254	14	ENSBTAG00000026963	NCALD
	63537920	63637920	14	ENSBTAG00000046358	PABPC1
	71297166	71397166	14	ENSBTAG00000047532	TRIQK
	81828266	81928266	14	ENSBTAG00000006770	MTBP
	82295678	82395678	14	ENSBTAG00000007302	SLC2A5
	1595280	1695280	15	ENSBTAG00000005392	KBTBD3
	4454810	4554810	15	ENSBTAG00000034827	PDGFD
	57046106	57146106	15	ENSBTAG00000021855	ANO3
	80354264	80454264	15	ENSBTAG00000004206	LRRC55
	942902	1042902	16	ENSBTAG00000011461	ADORA1
	27114390	27214390	16	ENSBTAG00000012778	CAPN2
	29550490	29650490	16	ENSBTAG00000024560	STUM
	30386968	30486968	16	ENSBTAG00000013949	AHCTF1
	31077192	31177192	16	ENSBTAG00000033180	SMYD3
	56276065	56376065	16	ENSBTAG00000015650	TNN
	79376578	79476578	16	ENSBTAG00000008153	CAMSAP2
	3140762	3240762	17	ENSBTAG00000024545	DCHS2
	15627009	15727009	17	ENSBTAG00000014111	INPP4B
	17876492	17976492	17	ENSBTAG00000011373	MAML3
	18136024	18236024	17	ENSBTAG00000003581	SETD7
	43979276	44079276	17	ENSBTAG00000053029/ENSBTAG00000013001	ZNF26/ZNF84
	44827430	44927430	17	ENSBTAG00000005644	GALNT9
	47472156	47572156	17	ENSBTAG00000002950	TMEM132D
	57522420	57622420	17	ENSBTAG00000044119	KSR2
	62110129	62210129	17	ENSBTAG00000006666/ENSBTAG00000006659	NAA25/TMEM116
	62542605	62642605	17	ENSBTAG00000021168	SIRT4
	4891799	4991799	18	ENSBTAG00000007184	NUDT7
	6117367	6217367	18	ENSBTAG00000015894	WWOX
	10160942	10260942	18	ENSBTAG00000053436/ENSBTAG00000004248	HSBP1/MLYCD
	14938936	15038936	18	ENSBTAG00000001872	ORC6
	18549268	18649268	18	ENSBTAG00000007942	TENT4B
	22289904	22389904	18	ENSBTAG00000012501	FTO
	43115294	43215294	18	ENSBTAG00000039441/ENSBTAG00000023614/ENSBTAG00000019266	RGS9BP/NUDT19/TDRD12
	49060869	49160869	18	ENSBTAG00000009785/ENSBTAG00000020429/ENSBTAG00000008573/ENSBTAG00000004017/ENSBTAG00000052512/ENSBTAG00000010467	SAMD4B/MED29/ZFP36/PLEKHG2/IL-15L/SUPT5H
	51594121	51694121	18	ENSBTAG00000018882/ENSBTAG00000023434	BSP5/BSP1
	65013534	65113534	18	ENSBTAG00000038947	ZSCAN4
	65320372	65420372	18	ENSBTAG00000039946	ZNF814
	10148335	10248335	19	ENSBTAG00000021681/ENSBTAG00000003365	PRR11/SMG8
	12744836	12844836	19	ENSBTAG00000020089/ENSBTAG00000012672	USP32/ZNHIT3
	16489982	16589982	19	ENSBTAG00000025200	ASIC2
	28579120	28679120	19	ENSBTAG00000012137	NTN1
	47059588	47159588	19	ENSBTAG00000015739	MRC2
	49880085	49980085	19	ENSBTAG00000015387	RAB40B
	49922344	50022344	19	ENSBTAG00000015387/ENSBTAG00000003695	RAB40B/WDR45B
	50141355	50241355	19	ENSBTAG00000018172	OGFOD3
	50454976	50554976	19	ENSBTAG00000011359	CD7
	51345684	51445684	19	ENSBTAG00000018271	SLC38A10
	61345535	61445535	19	ENSBTAG00000006937/ENSBTAG00000006921	ABCA10/ABCA6
	61734840	61834840	19	ENSBTAG00000039556	WIPI1
	2304412	2404412	20	ENSBTAG00000053195/ENSBTAG00000002865	bta-mir-12032/KCNIP1
	2669762	2769762	20	ENSBTAG00000002779/ENSBTAG00000024801	GABRP/RANBP17
	4316134	4416134	20	ENSBTAG00000001429	NEURL1B
	33173973	33273973	20	ENSBTAG00000010822	PLCXD3
	34962179	35062179	20	ENSBTAG00000016152	DAB2
	39900657	40000657	20	ENSBTAG00000012558	ADAMTS12
	41189866	41289866	20	ENSBTAG00000008414	ZFR
	46659345	46759345	20	ENSBTAG00000018234	CDH9
	53399585	53499585	20	ENSBTAG00000037844	CDH18
	17091361	17191361	21	ENSBTAG00000049909	AGBL1
	21680828	21780828	21	ENSBTAG00000018637/ENSBTAG00000018643	HDDC3/PRC1
	25535873	25635873	21	ENSBTAG00000007094	MINAR1
	31046895	31146895	21	ENSBTAG00000004024	UBE2Q2
	54623135	54723135	21	ENSBTAG00000016062	C21H14orf28
	57429244	57529244	21	ENSBTAG00000004598	GOLGA5
	57847391	57947391	21	ENSBTAG00000004310	UBR7
	60985644	61085644	21	ENSBTAG00000021717	BDKRB2
	61400735	61500735	21	ENSBTAG00000004054	PAPOLA
	9631116	9731116	22	ENSBTAG00000007732/ENSBTAG00000036357	ARPP21/bta-mir-128-2
	11885606	11985606	22	ENSBTAG00000019305	EXOG
	15226355	15326355	22	ENSBTAG00000003325/ENSBTAG00000044543	SNRK/bta-mir-2368
	17861023	17961023	22	ENSBTAG00000005433	SSUH2
	23164897	23264897	22	ENSBTAG00000000273	IL5RA
	46994737	47094737	22	ENSBTAG00000032374/ENSBTAG00000011180	SELENOK/ACTR8
	47777050	47877050	22	ENSBTAG00000020973	RFT1
	48013014	48113014	22	ENSBTAG00000011344/ENSBTAG00000032531/ENSBTAG00000007850	TMEM110/MUSTN1/ITIH4
COLD/THERMONEUTRAL	24785526	24885526	1	ENSBTAG00000010462	ROBO2
	44200030	44300030	1	ENSBTAG00000013663	CMSS1
	44396453	44496453	1	ENSBTAG00000013663/ENSBTAG00000013667	CMSS1/TMEM30C
	75096323	75196323	1	ENSBTAG00000012413	FGF12
	80377462	80477462	1	ENSBTAG00000014727	RFC4
	81110609	81210609	1	ENSBTAG00000014915	ETV5
	81606974	81706974	1	ENSBTAG00000001535/ENSBTAG00000029106/ENSBTAG00000017115	LIPH/5S_rRNA/TMEM41A
	83031849	83131849	1	ENSBTAG00000017666	ABCC5
	102371173	102471173	1	ENSBTAG00000006975	SI
	110043503	110143503	1	ENSBTAG00000024643	VEPH1
	116878702	116978702	1	ENSBTAG00000020990/ENSBTAG00000009848	P2RY14/GPR171
	118727869	118827869	1	ENSBTAG00000015163	TM4SF1
	126796004	126896004	1	ENSBTAG00000018138/ENSBTAG00000006222	GK5/TFDP2
	130536554	130636554	1	ENSBTAG00000018538	CEP70
	139929761	140029761	1	ENSBTAG00000051421	PCP4
	141602167	141702167	1	ENSBTAG00000030921/ENSBTAG00000008471/ENSBTAG00000030913	FAM3B/MX2/MX1
	146334457	146434457	1	ENSBTAG00000005503	PRMT2
	153297900	153397900	1	ENSBTAG00000004891	OXNAD1
	21728683	21828683	2	ENSBTAG00000002295	ATF2
	21930040	22030040	2	ENSBTAG00000008028	CHN1
	24937192	25037192	2	ENSBTAG00000016430	METTL8
	30257800	30357800	2	ENSBTAG00000018520/ENSBTAG00000016512	SCN1A/TTC21B
	56245477	56345477	2	ENSBTAG00000024632	LRP1B
	67492665	67592665	2	ENSBTAG00000005235	DPP10
	76709957	76809957	2	ENSBTAG00000031898	CNTNAP5
	106699769	106799769	2	ENSBTAG00000018415/ENSBTAG00000013489	TTLL4/CYP27A1
	115560580	115660580	2	ENSBTAG00000021323	AGFG1
	118847146	118947146	2	ENSBTAG00000026710/ENSBTAG00000005119	C2H2orf72/PSMD1
	1082726	1182726	3	ENSBTAG00000008931	CREG1
	3806300	3906300	3	ENSBTAG00000012025	LMX1A
	6496124	6596124	3	ENSBTAG00000027425	CCDC190
	10990167	11090167	3	ENSBTAG00000000888	SPTA1
	18557477	18657477	3	ENSBTAG00000039260/ENSBTAG00000015854	RPTN/TCHHL1
	20723550	20823550	3	ENSBTAG00000032456/ENSBTAG00000050881/ENSBTAG00000032455	H2AC21/H3C13/H2BC18
	40418958	40518958	3	ENSBTAG00000021217	COL11A1
	46198565	46298565	3	ENSBTAG00000031358	DPYD
	60253679	60353679	3	ENSBTAG00000003322	TTLL7
	65634294	65734294	3	ENSBTAG00000019733	ADGRL4
	70542505	70642505	3	ENSBTAG00000019401	LRRIQ3
	78366963	78466963	3	ENSBTAG00000005442	WDR78
	105040990	105140990	3	ENSBTAG00000001629	SCMH1
	109515152	109615152	3	ENSBTAG00000015969/ENSBTAG00000014358	STK40/EVA1B
	110592401	110692401	3	ENSBTAG00000021948	ZMYM6
	112110436	112210436	3	ENSBTAG00000005784	CSMD2
	114622300	114722300	3	ENSBTAG00000013869	SH3BP4
	27206320	27306320	4	ENSBTAG00000003808	HDAC9
	30293285	30393285	4	ENSBTAG00000014389/ENSBTAG00000013078	SP4/DNAH11
	30407993	30507993	4	ENSBTAG00000013078	DNAH11
	35397660	35497660	4	ENSBTAG00000024394	SEMA3D
	45785326	45885326	4	ENSBTAG00000000189	LHFPL3
	57410820	57510820	4	ENSBTAG00000004398	IMMP2L
	60099181	60199181	4	ENSBTAG00000003490	ELMO1
	60867347	60967347	4	ENSBTAG00000002011	KIAA0895
	68263751	68363751	4	ENSBTAG00000019024	JAZF1
	69108293	69208293	4	ENSBTAG00000005650	SKAP2
	76022824	76122824	4	ENSBTAG00000003994	IGFBP3
	87770253	87870253	4	ENSBTAG00000044664	U7
	87894727	87994727	4	ENSBTAG00000002151/ENSBTAG00000002157	ASB15/LMOD2
	88856864	88956864	4	ENSBTAG00000042864	U6
	100565221	100665221	4	ENSBTAG00000029965	bta-mir-490
	118045592	118145592	4	ENSBTAG00000020335	RNF32
	1977232	2077232	5	ENSBTAG00000018575	TRHDE
	4962505	5062505	5	ENSBTAG00000011590	GLIPR1
	28004954	28104954	5	ENSBTAG00000002673	FIGNL2
	36937357	37037357	5	ENSBTAG00000000395	ADAMTS20
	44300725	44400725	5	ENSBTAG00000026323	LYSB
	65948778	66048778	5	ENSBTAG00000039709	PARPBP
	71094630	71194630	5	ENSBTAG00000020634	FBXO7
	86452735	86552735	5	ENSBTAG00000022360	SOX5
	111370622	111470622	5	ENSBTAG00000014247	FAM83F
	115599625	115699625	5	ENSBTAG00000017652/ENSBTAG00000009913	NUP50/UPK3A
	115643793	115743793	5	ENSBTAG00000009913/ENSBTAG00000010590	UPK3A/FAM118A
	116370609	116470609	5	ENSBTAG00000029772/ENSBTAG00000045309/ENSBTAG00000008063	bta-let-7a-3/bta-mir-2443/PPARA
	116791887	116891887	5	ENSBTAG00000021803	GRAMD4
	7919025	8019025	6	ENSBTAG00000052120	6
	11471655	11571655	6	ENSBTAG00000017808	ARSJ
	12069048	12169048	6	ENSBTAG00000014463	CAMK2D
	15341410	15441410	6	ENSBTAG00000010564	ELOVL6
	24493832	24593832	6	ENSBTAG00000010610	DDIT4L
	45103190	45203190	6	ENSBTAG00000001545	SLC34A2
	60789033	60889033	6	ENSBTAG00000043958/ENSBTAG00000020367	TMEM33/SLC30A9
	65678229	65778229	6	ENSBTAG00000017837	GABRB1
	86330834	86430834	6	ENSBTAG00000012397/ENSBTAG00000002348	DCK/SLC4A4
	95666469	95766469	6	ENSBTAG00000035776	CFAP299
	101555230	101655230	6	ENSBTAG00000014947	PTPN13
	103401359	103501359	6	ENSBTAG00000004277	EVC2
	112867019	112967019	6	ENSBTAG00000003357	CLRN2
	115699351	115799351	6	ENSBTAG00000001504	NOP14
	2341922	2441922	7	ENSBTAG00000016187	GRM6
	12702376	12802376	7	ENSBTAG00000006077/ENSBTAG00000012062/ENSBTAG00000008654/ENSBTAG00000011825/ENSBTAG00000011811/ENSBTAG00000042170	RTBDN/PRDX2/HOOK2/TRIR/TNPO2/SNORD41
	14352009	14452009	7	ENSBTAG00000049881/ENSBTAG00000049452/ENSBTAG00000016988	ZNF266/UBL5/PIN1
	17929808	18029808	7	ENSBTAG00000021013/ENSBTAG00000031809/ENSBTAG00000003491/ENSBTAG00000020017	TUBB4A/DENND1C/SLC25A23/SLC25A41
	18795261	18895261	7	ENSBTAG00000051350	ZNRF4
	19170954	19270954	7	ENSBTAG00000031673	ARRDC5
	20972281	21072281	7	ENSBTAG00000007644	GNG7
	22095136	22195136	7	ENSBTAG00000001116	P4HA2
	27047343	27147343	7	ENSBTAG00000006797	MARCHF3
	34877117	34977117	7	ENSBTAG00000002143	DTWD2
	37933978	38033978	7	ENSBTAG00000017744/ENSBTAG00000025340	FAF2/CDHR2
	47334327	47434327	7	ENSBTAG00000025182/ENSBTAG00000009513	FBXL21/TGFBI
	49844987	49944987	7	ENSBTAG00000014182	CTNNA1
	52670797	52770797	7	ENSBTAG00000017371	RELL2
	60425602	60525602	7	ENSBTAG00000004896	ABLIM3
	82191276	82291276	7	ENSBTAG00000038117/ENSBTAG00000050733	ATG10/ATP6AP1L
	82873398	82973398	7	ENSBTAG00000024275	XRCC4
	90512983	90612983	7	ENSBTAG00000006031	ADGRV1
	521625	621625	8	ENSBTAG00000004944	ANXA10
	23963086	24063086	8	ENSBTAG00000014124	MLLT3
	25203083	25303083	8	ENSBTAG00000001322	SAXO1
	28749249	28849249	8	ENSBTAG00000007872	PSIP1
	51087296	51187296	8	ENSBTAG00000002746	OSTF1
	62841563	62941563	8	ENSBTAG00000009732	NCBP1
	80894503	80994503	8	ENSBTAG00000000738/ENSBTAG00000000720	DAPK1/CTSL
	83877495	83977495	8	ENSBTAG00000011814	CENPP
	85279708	85379708	8	ENSBTAG00000005803	PTPDC1
	86510410	86610410	8	ENSBTAG00000047649	AUH
	102073125	102173125	8	ENSBTAG00000044070	SNX30
	15415760	15515760	9	ENSBTAG00000016751	MYO6
	19652063	19752063	9	ENSBTAG00000005456	TTK
	42320768	42420768	9	ENSBTAG00000005699	SCML4
	50782512	50882512	9	ENSBTAG00000005729	FBXL4
	69186153	69286153	9	ENSBTAG00000000240	AKAP7
	81658099	81758099	9	ENSBTAG00000009665	UTRN
	87114626	87214626	9	ENSBTAG00000024751	ULBP17
	87328346	87428346	9	ENSBTAG00000026586	PPP1R14C
	101916211	102016211	9	ENSBTAG00000014496	CCR6
	3293140	3393140	10	ENSBTAG00000011076	KCNN2
	10535717	10635717	10	ENSBTAG00000006751	TENT2
	45715180	45815180	10	ENSBTAG00000016823	CSNK1G1
	49162505	49262505	10	ENSBTAG00000015904	RORA
	69057598	69157598	10	ENSBTAG00000030881	TMEM260
	69709274	69809274	10	ENSBTAG00000012998	NAA30
	76982581	77082581	10	ENSBTAG00000003469	CHURC1
	85693848	85793848	10	ENSBTAG00000021956	ISCA2
	2408693	2508693	11	ENSBTAG00000034995/ENSBTAG00000012925	ITPRIPL1/NCAPH
	6879912	6979912	11	ENSBTAG00000005273	IL1R1
	11439680	11539680	11	ENSBTAG00000050078	SFXN5
	18847246	18947246	11	ENSBTAG00000009020	CRIM1
	97858171	97958171	11	ENSBTAG00000023843	RALGPS1
	98693962	98793962	11	ENSBTAG00000011912/ENSBTAG00000014149/ENSBTAG00000014150	SLC25A25/LCN2/C11H9orf16
	103993185	104093185	11	ENSBTAG00000030278/ENSBTAG00000029979	EGFL7/bta-mir-126
	106593346	106693346	11	ENSBTAG00000012148	EHMT1
	106632471	106732471	11	ENSBTAG00000012148/ENSBTAG00000007882	EHMT1/CACNA1B
	2250645	2350645	12	ENSBTAG00000012443	DIAPH3
	12430546	12530546	12	ENSBTAG00000014752	AKAP11
	15728700	15828700	12	ENSBTAG00000018580	CBY2
	16496902	16596902	12	ENSBTAG00000002959	LRCH1
	32790998	32890998	12	ENSBTAG00000010769	GPR12
	35404037	35504037	12	ENSBTAG00000015943	MICU2
	68010288	68110288	12	ENSBTAG00000040347	GPC6
	83990274	84090274	12	ENSBTAG00000018237	MYO16
	6803227	6903227	13	ENSBTAG00000017188	ISM1
	10517492	10617492	13	ENSBTAG00000027506/ENSBTAG00000000516	SNRPB2/OTOR
	12709014	12809014	13	ENSBTAG00000019488	USP6NL
	26604447	26704447	13	ENSBTAG00000002123/ENSBTAG00000008056	MYO3A/GAD2
	32447741	32547741	13	ENSBTAG00000015525	SLC39A12
	51204301	51304301	13	ENSBTAG00000007922	RNF24
	63252542	63352542	13	ENSBTAG00000013387	CHMP4B
	67214571	67314571	13	ENSBTAG00000016864	LBP
	67760247	67860247	13	ENSBTAG00000004039	DHX35
	72729588	72829588	13	ENSBTAG00000002593/ENSBTAG00000013220/ENSBTAG00000012116	GDAP1L1/R3HDML/HNF4A
	73696516	73796516	13	ENSBTAG00000005181/ENSBTAG00000005186/ENSBTAG00000016122	SYS1/DBNDD2/PIGT
	75643756	75743756	13	ENSBTAG00000013336	EYA2
	80907038	81007038	13	ENSBTAG00000007917	TSHZ2
	81556009	81656009	13	ENSBTAG00000008812	PFDN4
	81812366	81912366	13	ENSBTAG00000047975	DOK5
	7878189	7978189	14	ENSBTAG00000001156	ST3GAL1
	8993296	9093296	14	ENSBTAG00000020667/ENSBTAG00000034196	KCNQ3/HHLA1
	9856433	9956433	14	ENSBTAG00000014600	ADCY8
	29059628	29159628	14	ENSBTAG00000036421	bta-mir-124a-2
	30063351	30163351	14	ENSBTAG00000008629	MTFR1
	35952866	36052866	14	ENSBTAG00000040496/ENSBTAG00000054013	KCNB2/bta-mir-1603
	60131171	60231171	14	ENSBTAG00000021887	DPYS
	81563196	81663196	14	ENSBTAG00000013369	COL14A1
	5678691	5778691	15	ENSBTAG00000015059/ENSBTAG00000053542	MMP13/MMP12
	15163319	15263319	15	ENSBTAG00000004034	SESN3
	29899570	29999570	15	ENSBTAG00000012562	RNF26
	34896066	34996066	15	ENSBTAG00000000986	USH1C
	41405372	41505372	15	ENSBTAG00000002914	GALNT18
	44106866	44206866	15	ENSBTAG00000011910	STK33
	44421231	44521231	15	ENSBTAG00000004863	RIC3
	63916654	64016654	15	ENSBTAG00000014884/ENSBTAG00000012846	HIPK3/KIAA1549L
	73689991	73789991	15	ENSBTAG00000000087	HSD17B12
	3906884	4006884	16	ENSBTAG00000001483	SRGAP2
	27227052	27327052	16	ENSBTAG00000019538	FBXO28
	37660632	37760632	16	ENSBTAG00000021298	METTL11B
	38780470	38880470	16	ENSBTAG00000002974/ENSBTAG00000021408/ENSBTAG00000016685	FMO2/FMO1/FMO4
	47151903	47251903	16	ENSBTAG00000040477	CHD5
	62725973	62825973	16	ENSBTAG00000020887	CACNA1E
	64854049	64954049	16	ENSBTAG00000019630	RGL1
	70678849	70778849	16	ENSBTAG00000010016/ENSBTAG00000011340	SPATA45/NSL1
	75449010	75549010	16	ENSBTAG00000010562	CD34
	80301106	80401106	16	ENSBTAG00000004790	UBE2T
	19773070	19873070	17	ENSBTAG00000046209	U1
	44979111	45079111	17	ENSBTAG00000017219	DDX51
	64092204	64192204	17	ENSBTAG00000018833/ENSBTAG00000018825	SVOP/SSH1
	7619094	7719094	18	ENSBTAG00000011635	CENPN
	19085958	19185958	18	ENSBTAG00000020936/ENSBTAG00000006291	NOD2/CYLD
	38180952	38280952	18	ENSBTAG00000014636	ZFHX3
	39743889	39843889	18	ENSBTAG00000047367	CMTR2
	40480775	40580775	18	ENSBTAG00000007559	URI1
	40793328	40893328	18	ENSBTAG00000007262	ZNF536
	43329174	43429174	18	ENSBTAG00000010403	FAAP24
	64444781	64544781	18	ENSBTAG00000003261/ENSBTAG00000038926/ENSBTAG00000017872	AURKC/ZNF805/ZNF304
	10644269	10744269	19	ENSBTAG00000016708/ENSBTAG00000011623	CLTC/VMP1
	16489982	16589982	19	ENSBTAG00000025200	ASIC2
	20560643	20660643	19	ENSBTAG00000005352	CRYBA1
	23600335	23700335	19	ENSBTAG00000020000	RAP1GAP2
	35664202	35764202	19	ENSBTAG00000012293	SPAG9
	39488298	39588298	19	ENSBTAG00000030587	LASP1
	44124487	44224487	19	ENSBTAG00000001615/ENSBTAG00000018823	RUNDC3A/GRN
	44353315	44453315	19	ENSBTAG00000039485/ENSBTAG00000005696	MEIOC/DBF4B
	48938244	49038244	19	ENSBTAG00000053910	C17orf58
	51428494	51528494	19	ENSBTAG00000018271/ENSBTAG00000019972/ENSBTAG00000000875	SLC38A10/TEPSIN/CEP131
	53781725	53881725	19	ENSBTAG00000000920/ENSBTAG00000008441	DNAH17/SOCS3
	56291205	56391205	19	ENSBTAG00000030169/ENSBTAG00000030170/ENSBTAG00000011527	SUMO2/JPT1/NT5C
	1935423	2035423	20	ENSBTAG00000014612/ENSBTAG00000014620	DOCK2/FOXI1
	23543803	23643803	20	ENSBTAG00000010526	PLPP1
	71044690	71144690	20	ENSBTAG00000000944/ENSBTAG00000015843/ENSBTAG00000001329	LPCAT1/SLC6A3/CLPTM1L
	23650826	23750826	21	ENSBTAG00000050976	21
	681015	781015	22	ENSBTAG00000012073	VOPP1
	11013911	11113911	22	ENSBTAG00000016566	ITGA9
	41523980	41623980	22	ENSBTAG00000014418	FHIT
	48830998	48930998	22	ENSBTAG00000021912	DUSP7
	53153469	53253469	22	ENSBTAG00000019428	CCR1
HARSH COLD	6204730	6304730	1	ENSBTAG00000034854	GRIK1
	8845681	8945681	1	ENSBTAG00000052349	H4
	9890497	9990497	1	ENSBTAG00000050914	CYYR1
	24785526	24885526	1	ENSBTAG00000010462	ROBO2
	53532877	53632877	1	ENSBTAG00000049108	TRAT1
	58645977	58745977	1	ENSBTAG00000004977	QTRT2
	58884843	58984843	1	ENSBTAG00000011921	TIGIT
	70802215	70902215	1	ENSBTAG00000012347	SLC51A
	71381023	71481023	1	ENSBTAG00000032674/ENSBTAG00000048390	SENP5/NCBP2AS2
	73027982	73127982	1	ENSBTAG00000013204	ATP13A3
	81844812	81944812	1	ENSBTAG00000019625	EHHADH
	96892516	96992516	1	ENSBTAG00000016323	SLC7A14
	102371173	102471173	1	ENSBTAG00000006975	SI
	110043503	110143503	1	ENSBTAG00000024643	VEPH1
	141602167	141702167	1	ENSBTAG00000030921/ENSBTAG00000008471/ENSBTAG00000030913	FAM3B/MX2/MX1
	1016919	1116919	2	ENSBTAG00000002316/ENSBTAG00000016895	NIPA1/NIPA2
	29869184	29969184	2	ENSBTAG00000019137	SCN7A
	55496478	55596478	2	ENSBTAG00000024632	LRP1B
	122411245	122511245	2	ENSBTAG00000020159	NKAIN1
	131944228	132044228	2	ENSBTAG00000017644/ENSBTAG00000006085	KIF17/DDOST
	6564779	6664779	3	ENSBTAG00000027425	CCDC190
	10990167	11090167	3	ENSBTAG00000000888	SPTA1
	21875238	21975238	3	ENSBTAG00000006720/ENSBTAG00000017051/ENSBTAG00000043818	GJA5/ACP6/7SK
	31384239	31484239	3	ENSBTAG00000031654	KCND3
	40418958	40518958	3	ENSBTAG00000021217	COL11A1
	46198565	46298565	3	ENSBTAG00000031358	DPYD
	49150769	49250769	3	ENSBTAG00000004190	ARHGAP29
	60253679	60353679	3	ENSBTAG00000003322	TTLL7
	112110436	112210436	3	ENSBTAG00000005784	CSMD2
	113383557	113483557	3	ENSBTAG00000026181	UGT1A1
	5011724	5111724	4	ENSBTAG00000017086	GRB10
	27206320	27306320	4	ENSBTAG00000003808	HDAC9
	35397660	35497660	4	ENSBTAG00000024394	SEMA3D
	68263751	68363751	4	ENSBTAG00000019024	JAZF1
	69072638	69172638	4	ENSBTAG00000005650	SKAP2
	82263107	82363107	4	ENSBTAG00000031967	AMPH
	82746269	82846269	4	ENSBTAG00000012649	LSM8
	86209448	86309448	4	ENSBTAG00000012119	PTPRZ1
	92049005	92149005	4	ENSBTAG00000010692	SND1
	93207549	93307549	4	ENSBTAG00000001754	AHCYL2
	96920225	97020225	4	ENSBTAG00000014112	EXOC4
	111836747	111936747	4	ENSBTAG00000008736	CUL1
	113839320	113939320	4	ENSBTAG00000004540	NUB1
	14752322	14852322	5	ENSBTAG00000027900	LRRIQ1
	25649752	25749752	5	ENSBTAG00000013745/ENSBTAG00000015604/ENSBTAG00000015592	ITGA5/ZNF385A/GPR84
	30829776	30929776	5	ENSBTAG00000015347/ENSBTAG00000051755/ENSBTAG00000015828/ENSBTAG00000018773	WNT10B/ARF3/FKBP11/RND1
	33952538	34052538	5	ENSBTAG00000000859	SLC38A1
	37523018	37623018	5	ENSBTAG00000042612	SNORA62
	42868584	42968584	5	ENSBTAG00000015311/ENSBTAG00000015296	PTPRR/PTPRB
	70847603	70947603	5	ENSBTAG00000027064/ENSBTAG00000004654	BTBD11/PWP1
	71047173	71147173	5	ENSBTAG00000020634	FBXO7
	108003565	108103565	5	ENSBTAG00000013658	ERC1
	108057405	108157405	5	ENSBTAG00000054367	WNT5B
	108937909	109037909	5	ENSBTAG00000009704	CECR2
	2034530	2134530	6	ENSBTAG00000044082	MARCHF1
	11487824	11587824	6	ENSBTAG00000017808	ARSJ
	11994622	12094622	6	ENSBTAG00000014463	CAMK2D
	24493832	24593832	6	ENSBTAG00000010610	DDIT4L
	30212006	30312006	6	ENSBTAG00000046888/ENSBTAG00000017073	Metazoa_SRP/HPGDS
	30248419	30348419	6	ENSBTAG00000017073	HPGDS
	58270244	58370244	6	ENSBTAG00000006044/ENSBTAG00000014512	KLHL5/WDR19
	91735150	91835150	6	ENSBTAG00000021372	SEPTIN11
	95666469	95766469	6	ENSBTAG00000035776	CFAP299
	101515330	101615330	6	ENSBTAG00000014947	PTPN13
	103633720	103733720	6	ENSBTAG00000004277	EVC2
	112896370	112996370	6	ENSBTAG00000003357	CLRN2
	114418993	114518993	6	ENSBTAG00000047876	SH3TC1
	115924179	116024179	6	ENSBTAG00000015126	TNIP2
	2341922	2441922	7	ENSBTAG00000016187	GRM6
	12567924	12667924	7	ENSBTAG00000015117/ENSBTAG00000021374/ENSBTAG00000016213	GADD45GIP1/FARSA/SYCE2
	12783745	12883745	7	ENSBTAG00000011825/ENSBTAG00000011811/ENSBTAG00000042170/ENSBTAG00000020924/ENSBTAG00000006247/ENSBTAG00000006244/ENSBTAG00000006241	TRIR/TNPO2/SNORD41/FBXW9/DHPS/WDR83OS/MAN2B1
	14718778	14818778	7	ENSBTAG00000001419/ENSBTAG00000010303	MRPL4/ICAM1
	16625279	16725279	7	ENSBTAG00000004294/ENSBTAG00000004300/ENSBTAG00000010639/ENSBTAG00000014926	EVI5L/LRRC8E/MAP2K7/SNAPC2
	20155533	20255533	7	ENSBTAG00000000755/ENSBTAG00000006619/ENSBTAG00000009750/ENSBTAG00000008395	ZFR2/MATK/RAX2/APBA3
	20721979	20821979	7	ENSBTAG00000031363/ENSBTAG00000001153	TLE5/TLE2
	22131187	22231187	7	ENSBTAG00000001116	P4HA2
	22603770	22703770	7	ENSBTAG00000025443	FNIP1
	23225178	23325178	7	ENSBTAG00000010959	HINT1
	33479740	33579740	7	ENSBTAG00000044669	U6
	37789380	37889380	7	ENSBTAG00000025345/ENSBTAG00000010735	ARL10/HIGD2A
	46243900	46343900	7	ENSBTAG00000021519/ENSBTAG00000021520/ENSBTAG00000012762/ENSBTAG00000051363	CAMLG/DDX46/C7H5orf24/5S_rRNA
	58445617	58545617	7	ENSBTAG00000000626	STK32A
	59650374	59750374	7	ENSBTAG00000044183/ENSBTAG00000052488	SPINK7/SPINK9
	90008029	90108029	7	ENSBTAG00000044077	POLR3G
	28749249	28849249	8	ENSBTAG00000007872	PSIP1
	64986298	65086298	8	ENSBTAG00000008016	STX17
	70696297	70796297	8	ENSBTAG00000019099	SLC25A37
	86510410	86610410	8	ENSBTAG00000047649	AUH
	88924063	89024063	8	ENSBTAG00000011375	SHC3
	36141579	36241579	9	ENSBTAG00000000188	HS3ST5
	60898349	60998349	9	ENSBTAG00000011672	GABRR1
	61012154	61112154	9	ENSBTAG00000046235/ENSBTAG00000002725	SRSF12/RNGTT
	63722321	63822321	9	ENSBTAG00000006672	SYNCRIP
	69186153	69286153	9	ENSBTAG00000000240	AKAP7
	81658099	81758099	9	ENSBTAG00000009665	UTRN
	84742441	84842441	9	ENSBTAG00000036287	SAMD5
	88398285	88498285	9	ENSBTAG00000014788/ENSBTAG00000044223/ENSBTAG00000004098	AKAP12/bta-mir-2285e-2/ARMT1
	2240464	2340464	10	ENSBTAG00000011338/ENSBTAG00000048541	NREP/10
	4999003	5099003	10	ENSBTAG00000011608	KIAA1191
	32435711	32535711	10	ENSBTAG00000002179	C10H15orf41
	45301906	45401906	10	ENSBTAG00000011037/ENSBTAG00000015806	RBPMS2/OAZ2
	66855609	66955609	10	ENSBTAG00000019496	CDKN3
	69735726	69835726	10	ENSBTAG00000012998	NAA30
	79728640	79828640	10	ENSBTAG00000018971	RAD51B
	85286874	85386874	10	ENSBTAG00000020327/ENSBTAG00000020331/ENSBTAG00000018467	ZNF410/COQ6/BBOF1
	85673755	85773755	10	ENSBTAG00000005774	VRTN
	15106976	15206976	11	ENSBTAG00000027932/ENSBTAG00000033010	BIRC6/TTC27
	29699248	29799248	11	ENSBTAG00000006474	EPCAM
	50460351	50560351	11	ENSBTAG00000006075	SUCLG1
	68637376	68737376	11	ENSBTAG00000015865	CAPN14
	98693962	98793962	11	ENSBTAG00000011912/ENSBTAG00000014149/ENSBTAG00000014150	SLC25A25/LCN2/C11H9orf16
	2199044	2299044	12	ENSBTAG00000012443	DIAPH3
	52717067	52817067	12	ENSBTAG00000032821	SCEL
	52845133	52945133	12	ENSBTAG00000003511/ENSBTAG00000044565	SLAIN1/bta-mir-2284s
	36239664	36339664	13	ENSBTAG00000017354	MPP7
	42398271	42498271	13	ENSBTAG00000040147	SYNDIG1
	48041318	48141318	13	ENSBTAG00000011782/ENSBTAG00000014623	CHGB/MCM8
	7901654	8001654	14	ENSBTAG00000001156	ST3GAL1
	8014004	8114004	14	ENSBTAG00000000711	NDRG1
	10713835	10813835	14	ENSBTAG00000020801	FAM49B
	15650185	15750185	14	ENSBTAG00000022114	TMEM65
	29059628	29159628	14	ENSBTAG00000036421	bta-mir-124a-2
	62499674	62599674	14	ENSBTAG00000026963	NCALD
	81563196	81663196	14	ENSBTAG00000013369	COL14A1
	16366329	16466329	15	ENSBTAG00000044144	GUCY1A2
	22198887	22298887	15	ENSBTAG00000004951/ENSBTAG00000000440/ENSBTAG00000008661	C15H11orf1/HSPB2/C15H11orf52
	22248615	22348615	15	ENSBTAG00000008661/ENSBTAG00000008665/ENSBTAG00000010709	C15H11orf52/DIXDC1/DLAT
	22439913	22539913	15	ENSBTAG00000016548/ENSBTAG00000034193	TEX12/BCO2
	24301620	24401620	15	ENSBTAG00000039149	CLDN25
	27965489	28065489	15	ENSBTAG00000019358/ENSBTAG00000014137	RNF214/CEP164
	34896066	34996066	15	ENSBTAG00000000986	USH1C
	37908705	38008705	15	ENSBTAG00000010419	CYP2R1
	41405372	41505372	15	ENSBTAG00000002914	GALNT18
	44074168	44174168	15	ENSBTAG00000011910	STK33
	57104011	57204011	15	ENSBTAG00000021855	ANO3
	63440623	63540623	15	ENSBTAG00000020731	PRRG4
	65002346	65102346	15	ENSBTAG00000020980	CAT
	816294	916294	16	ENSBTAG00000011461	ADORA1
	3906884	4006884	16	ENSBTAG00000001483	SRGAP2
	21276517	21376517	16	ENSBTAG00000052073	SPATA17
	38780470	38880470	16	ENSBTAG00000002974/ENSBTAG00000021408/ENSBTAG00000016685	FMO2/FMO1/FMO4
	47151903	47251903	16	ENSBTAG00000040477	CHD5
	55189686	55289686	16	ENSBTAG00000004358/ENSBTAG00000004361	DARS2/ZBTB37
	72115897	72215897	16	ENSBTAG00000008710	KCNH1
	75161979	75261979	16	ENSBTAG00000001173/ENSBTAG00000054210	PLXNA2/bta-mir-6121
	76344413	76444413	16	ENSBTAG00000008944	CRB1
	19391907	19491907	17	ENSBTAG00000034075	SLC7A11
	62323110	62423110	17	ENSBTAG00000003696	BICDL1
	64092204	64192204	17	ENSBTAG00000018833/ENSBTAG00000018825	SVOP/SSH1
	19085958	19185958	18	ENSBTAG00000020936/ENSBTAG00000006291	NOD2/CYLD
	21584314	21684314	18	ENSBTAG00000002287	CHD9
	23509322	23609322	18	ENSBTAG00000016407	IRX6
	23916401	24016401	18	ENSBTAG00000003353/ENSBTAG00000011021	SLC6A2/CES1
	40793328	40893328	18	ENSBTAG00000007262	ZNF536
	45708759	45808759	18	ENSBTAG00000003820/ENSBTAG00000003826/ENSBTAG00000003829	GRAMD1A/SCN1B/HPN
	49060869	49160869	18	ENSBTAG00000009785/ENSBTAG00000020429/ENSBTAG00000008573/ENSBTAG00000004017/ENSBTAG00000052512/ENSBTAG00000010467	SAMD4B/MED29/ZFP36/PLEKHG2/IL-15L/SUPT5H
	64444781	64544781	18	ENSBTAG00000003261/ENSBTAG00000038926/ENSBTAG00000017872	AURKC/ZNF805/ZNF304
	64498360	64598360	18	ENSBTAG00000017872	ZNF304
	64674506	64774506	18	ENSBTAG00000017613	ZNF419
	17417854	17517854	19	ENSBTAG00000015527	MYO1D
	28045023	28145023	19	ENSBTAG00000011994	NDEL1
	28579120	28679120	19	ENSBTAG00000012137	NTN1
	34070456	34170456	19	ENSBTAG00000017790/ENSBTAG00000017790/ENSBTAG00000006187	B9D1/B9D1/MFAP4
	35664202	35764202	19	ENSBTAG00000012293	SPAG9
	44381617	44481617	19	ENSBTAG00000039485/ENSBTAG00000005696	MEIOC/DBF4B
	45947313	46047313	19	ENSBTAG00000017512	MAPT
	48938244	49038244	19	ENSBTAG00000053910	C17orf58
	53723783	53823783	19	ENSBTAG00000000920	DNAH17
	23543803	23643803	20	ENSBTAG00000010526	PLPP1
	35119183	35219183	20	ENSBTAG00000016149	C9
	36520529	36620529	20	ENSBTAG00000005176	GDNF
	46737179	46837179	20	ENSBTAG00000018234	CDH9
	65349267	65449267	20	ENSBTAG00000009400/ENSBTAG00000055034	FASTKD3/C5orf49
	5243149	5343149	21	ENSBTAG00000000640/ENSBTAG00000007357	SELENOS/CHSY1
	31302808	31402808	21	ENSBTAG00000012489	TMEM266
	54791136	54891136	21	ENSBTAG00000039117/ENSBTAG00000002603/ENSBTAG00000045184/ENSBTAG00000002612	TOGARAM1/PRPF39/SNORD127/FANCM
	61362716	61462716	21	ENSBTAG00000004054	PAPOLA
	64479310	64579310	21	ENSBTAG00000018636	CCNK
	64732256	64832256	21	ENSBTAG00000013491	EML1
	66901310	67001310	21	ENSBTAG00000016598/ENSBTAG00000007007	DYNC1H1/WDR20
	6826710	6926710	22	ENSBTAG00000001712	CMTM7
	15226355	15326355	22	ENSBTAG00000003325/ENSBTAG00000044543	SNRK/bta-mir-2368
	29187947	29287947	22	ENSBTAG00000022689	RYBP
	51754078	51854078	22	ENSBTAG00000015839	MAP4
FST3
Yunnan Humped	466404	566404	1	ENSBTAG00000049697/ENSBTAG00000047028	5S_rRNA/5S_rRNA
	31219020	31319020	1	ENSBTAG00000045043	U4
	41706440	41806440	1	ENSBTAG00000044111	EPHA6
	63901419	64001419	1	ENSBTAG00000009014	UPK1B
	80013107	80113107	1	ENSBTAG00000012467	MASP1
	107122243	107222243	1	ENSBTAG00000031572	IFT80
	116532598	116632598	1	ENSBTAG00000001728	IGSF10
	117268567	117368567	1	ENSBTAG00000023445	SIAH2
	130536554	130636554	1	ENSBTAG00000018538	CEP70
	144148500	144248500	1	ENSBTAG00000007106	GATD3A
	149501396	149601396	1	ENSBTAG00000001771	DYRK1A
	150524361	150624361	1	ENSBTAG00000000973	KCNJ15
	151075563	151175563	1	ENSBTAG00000043221/ENSBTAG00000009214	SNORA70/ETS2
	153140553	153240553	1	ENSBTAG00000008240	GALNT15
	156593814	156693814	1	ENSBTAG00000012798	KCNH8
	4871527	4971527	2	ENSBTAG00000006262	LIMS2
	27865549	27965549	2	ENSBTAG00000017162	STK39
	28977343	29077343	2	ENSBTAG00000051197	bta-mir-2285w
	48232793	48332793	2	ENSBTAG00000015291	ORC4
	61772538	61872538	2	ENSBTAG00000026842	ZRANB3
	88412321	88512321	2	ENSBTAG00000009952	C2H2orf69
	95069968	95169968	2	ENSBTAG00000016193	FASTKD2
	103299600	103399600	2	ENSBTAG00000019274	ATIC
	107479096	107579096	2	ENSBTAG00000009972/ENSBTAG00000038992/ENSBTAG00000014975	INHA/STK11IP/SLC4A3
	113666333	113766333	2	ENSBTAG00000019152	NYAP2
	115425433	115525433	2	ENSBTAG00000021316/ENSBTAG00000021319	COL4A3/MFF
	119618743	119718743	2	ENSBTAG00000011964/ENSBTAG00000043514	DIS3L2/SNORA62
	119920477	120020477	2	ENSBTAG00000011964	DIS3L2
	120864934	120964934	2	ENSBTAG00000018065/ENSBTAG00000026684	YARS1/SYNC
	128434790	128534790	2	ENSBTAG00000010278	STPG1
	128645085	128745085	2	ENSBTAG00000001101	IFNLR1
	128762635	128862635	2	ENSBTAG00000001100/ENSBTAG00000014885	IL22RA1/MYOM3
	131944228	132044228	2	ENSBTAG00000017644/ENSBTAG00000006085	KIF17/DDOST
	135592360	135692360	2	ENSBTAG00000008309/ENSBTAG00000003832	ATP13A2/MFAP2
	2708916	2808916	3	ENSBTAG00000047468/ENSBTAG00000049299	FAM78B/bta-mir-2285bb
	12867444	12967444	3	ENSBTAG00000000964	FCRL5
	15416136	15516136	3	ENSBTAG00000000057/ENSBTAG00000017104/ENSBTAG00000010617/ENSBTAG00000003535	THBS3/MUC1/KRTCAP2/DPM3
	19810064	19910064	3	ENSBTAG00000021037	ARNT
	23433332	23533332	3	ENSBTAG00000032193	REG4
	29434511	29534511	3	ENSBTAG00000003614/ENSBTAG00000012419/ENSBTAG00000019617	AP4B1/BCL2L15/PTPN22
	31328175	31428175	3	ENSBTAG00000031654	KCND3
	32217174	32317174	3	ENSBTAG00000020172/ENSBTAG00000009888	DENND2D/DRAM2
	33641011	33741011	3	ENSBTAG00000001845/ENSBTAG00000001842	EPS8L3/GSTM3
	40418958	40518958	3	ENSBTAG00000021217	COL11A1
	45776189	45876189	3	ENSBTAG00000031358	DPYD
	48951262	49051262	3	ENSBTAG00000007101	F3
	49653647	49753647	3	ENSBTAG00000003245	BCAR3
	51926646	52026646	3	ENSBTAG00000020856	HFM1
	52279712	52379712	3	ENSBTAG00000011200	ZNF644
	60097732	60197732	3	ENSBTAG00000003322	TTLL7
	65634294	65734294	3	ENSBTAG00000019733	ADGRL4
	73179266	73279266	3	ENSBTAG00000055278	NEGR1
	82063195	82163195	3	ENSBTAG00000030710	ITGB3BP
	87359431	87459431	3	ENSBTAG00000013961/ENSBTAG00000004381	MYSM1/TACSTD2
	92032212	92132212	3	ENSBTAG00000020037/ENSBTAG00000020036	CYB5RL/CDCP2
	92975923	93075923	3	ENSBTAG00000000736/ENSBTAG00000003485/ENSBTAG00000003484	LRP8/MAGOH/CZIB
	93156341	93256341	3	ENSBTAG00000012516	SLC1A7
	93357420	93457420	3	ENSBTAG00000002910	ECHDC2
	99869665	99969665	3	ENSBTAG00000013322/ENSBTAG00000048829/ENSBTAG00000002979	POMGNT1/P3R3URF/PIK3R3
	100273316	100373316	3	ENSBTAG00000016377	IPP
	101976561	102076561	3	ENSBTAG00000008690	SLC6A9
	112332551	112432551	3	ENSBTAG00000014596	EFHD1
	9565916	9665916	4	ENSBTAG00000034936	ANKIB1
	9676535	9776535	4	ENSBTAG00000034936/ENSBTAG00000021996	ANKIB1/GATAD1
	9752046	9852046	4	ENSBTAG00000021996	GATAD1
	10714478	10814478	4	ENSBTAG00000014255	VPS50
	11126127	11226127	4	ENSBTAG00000002674	GNGT1
	12476900	12576900	4	ENSBTAG00000024426	PPP1R9A
	27118288	27218288	4	ENSBTAG00000003808	HDAC9
	31832336	31932336	4	ENSBTAG00000016014/ENSBTAG00000000604/ENSBTAG00000019403	NUP42/GPNMB/MALSU1
	36483621	36583621	4	ENSBTAG00000018133	SEMA3A
	40016281	40116281	4	ENSBTAG00000006138	SEMA3C
	46155276	46255276	4	ENSBTAG00000009207	KMT2E
	50466693	50566693	4	ENSBTAG00000021469	CTTNBP2
	52287891	52387891	4	ENSBTAG00000014228	TFEC
	61394963	61494963	4	ENSBTAG00000015105	HERPUD2
	68892061	68992061	4	ENSBTAG00000024341/ENSBTAG00000012211/ENSBTAG00000008139/ENSBTAG00000001063/ENSBTAG00000008138/ENSBTAG00000013263	HOXA6/HOXA5/HOXA3/HOXA4/HOXA2/HOXA1
	70650960	70750960	4	ENSBTAG00000019447/ENSBTAG00000019445/ENSBTAG00000022613	NPVF/C4H7orf31/CYCS
	70789756	70889756	4	ENSBTAG00000019342	OSBPL3
	72225120	72325120	4	ENSBTAG00000007136	ADAM22
	73317338	73417338	4	ENSBTAG00000046430	ZNF804B
	74300995	74400995	4	ENSBTAG00000015749	STEAP1
	80831001	80931001	4	ENSBTAG00000018715	MPLKIP
	91901169	92001169	4	ENSBTAG00000010692	SND1
	92772666	92872666	4	ENSBTAG00000011002/ENSBTAG00000006253/ENSBTAG00000045109/ENSBTAG00000007572/ENSBTAG00000045645	CCDC136/FLNC/bta-mir-2422/ATP6V1F/ATP6V1FNB
	101534678	101634678	4	ENSBTAG00000043638	7SK
	103729073	103829073	4	ENSBTAG00000012261	RAB19
	105744912	105844912	4	ENSBTAG00000048775	TRBV15
	106143024	106243024	4	ENSBTAG00000015510	EPHB6
	118467158	118567158	4	ENSBTAG00000008025	UBE3C
	119502457	119602457	4	ENSBTAG00000024157	WDR60
	7601053	7701053	5	ENSBTAG00000009852	NAV3
	26826852	26926852	5	ENSBTAG00000007829/ENSBTAG00000021464	CSAD/SPRYD3
	41515285	41615285	5	ENSBTAG00000038043	ABCD2
	41863821	41963821	5	ENSBTAG00000004832	KIF21A
	42787081	42887081	5	ENSBTAG00000015311/ENSBTAG00000015296	PTPRR/PTPRB
	44801029	44901029	5	ENSBTAG00000013496	CPM
	47396050	47496050	5	ENSBTAG00000033726	GRIP1
	75672589	75772589	5	ENSBTAG00000014237	CYTH4
	88726643	88826643	5	ENSBTAG00000021083	RECQL
	106106728	106206728	5	ENSBTAG00000000275/ENSBTAG00000018940	PARP11/CRACR2A
	107503915	107603915	5	ENSBTAG00000005221	WNK1
	109724563	109824563	5	ENSBTAG00000037703/ENSBTAG00000004820	MICALL1/POLR2F
	110860712	110960712	5	ENSBTAG00000012503/ENSBTAG00000017439/ENSBTAG00000017462	MGAT3/MIEF1/ATF4
	113449150	113549150	5	ENSBTAG00000037110	U12
	113864967	113964967	5	ENSBTAG00000018073	TSPO
	116755792	116855792	5	ENSBTAG00000021803	GRAMD4
	117052295	117152295	5	ENSBTAG00000012291	TBC1D22A
	58219352	58319352	6	ENSBTAG00000006044	KLHL5
	59570476	59670476	6	ENSBTAG00000001572	NSUN7
	91137144	91237144	6	ENSBTAG00000010389	STBD1
	114084405	114184405	6	ENSBTAG00000027434	SORCS2
	116664864	116764864	6	ENSBTAG00000020108	LETM1
	15332521	15432521	7	ENSBTAG00000012048/ENSBTAG00000045893/ENSBTAG00000019220	CARM1/TIMM29/SMARCA4
	15843312	15943312	7	ENSBTAG00000011207	CNN1
	16321434	16421434	7	ENSBTAG00000002629/ENSBTAG00000046837/ENSBTAG00000005592/ENSBTAG00000032137	TEX45/ZNF358/MCOLN1/PNPLA6
	17998182	18098182	7	ENSBTAG00000031809/ENSBTAG00000003491/ENSBTAG00000020017/ENSBTAG00000021018/ENSBTAG00000021016/ENSBTAG00000031794	DENND1C/SLC25A23/SLC25A41/KHSRP/GTF2F1/PSPN
	38073606	38173606	7	ENSBTAG00000003103/ENSBTAG00000017451	EIF4E1B/TSPAN17
	38505200	38605200	7	ENSBTAG00000010541/ENSBTAG00000010543	ZNF346/FGFR4
	54051652	54151652	7	ENSBTAG00000027151	ARHGAP26
	61970599	62070599	7	ENSBTAG00000013744/ENSBTAG00000025136	SYNPO/MYOZ3
	73105944	73205944	7	ENSBTAG00000042626	SNORD22
	79672956	79772956	7	ENSBTAG00000025071	TENM2
	80947126	81047126	7	ENSBTAG00000030259	RASGRF2
	90030630	90130630	7	ENSBTAG00000044077	POLR3G
	90152205	90252205	7	ENSBTAG00000006031	ADGRV1
	97937849	98037849	7	ENSBTAG00000011864	RGMB
	9550065	9650065	8	ENSBTAG00000017232	KIF13B
	22080988	22180988	8	ENSBTAG00000051567	CDKN2B
	27823118	27923118	8	ENSBTAG00000003669	BNC2
	39860889	39960889	8	ENSBTAG00000011048	SPATA6L
	45907514	46007514	8	ENSBTAG00000033396	C8H9orf135
	59332947	59432947	8	ENSBTAG00000011397	UNC13B
	60371946	60471946	8	ENSBTAG00000000076/ENSBTAG00000000078/ENSBTAG00000021696	RECK/GLIPR2/CCIN
	60822538	60922538	8	ENSBTAG00000021686	MELK
	62841563	62941563	8	ENSBTAG00000009732	NCBP1
	70385604	70485604	8	ENSBTAG00000013528/ENSBTAG00000025830	CHMP7/R3HCC1
	70667409	70767409	8	ENSBTAG00000019099	SLC25A37
	88726350	88826350	8	ENSBTAG00000001941	SEMA4D
	101181366	101281366	8	ENSBTAG00000053723	bta-mir-7863
	112036855	112136855	8	ENSBTAG00000003540/ENSBTAG00000050986	MYT1L/PXDN
	7942599	8042599	9	ENSBTAG00000015335	ADGRB3
	17336067	17436067	9	ENSBTAG00000054151	MEI4
	20067983	20167983	9	ENSBTAG00000012096	BCKDHB
	29802432	29902432	9	ENSBTAG00000009575/ENSBTAG00000053243	TBC1D32/bta-mir-12063
	31999723	32099723	9	ENSBTAG00000015467	FAM184A
	33113184	33213184	9	ENSBTAG00000016046	GOPC
	62306223	62406223	9	ENSBTAG00000016967	RARS2
	81974459	82074459	9	ENSBTAG00000009665	UTRN
	83411690	83511690	9	ENSBTAG00000044181	GRM1
	94461747	94561747	9	ENSBTAG00000006323/ENSBTAG00000000817	SNX9/SYNJ2
	94593772	94693772	9	ENSBTAG00000000817	SYNJ2
	103415712	103515712	9	ENSBTAG00000003925	C9H6orf120
	104044973	104144973	9	ENSBTAG00000007686	TBP
	2070126	2170126	10	ENSBTAG00000050601	10
	11027620	11127620	10	ENSBTAG00000012866	THBS4
	12495495	12595495	10	ENSBTAG00000025826	SLC24A1
	19355189	19455189	10	ENSBTAG00000006708	ARIH1
	21055172	21155172	10	ENSBTAG00000001871	NRL
	29449473	29549473	10	ENSBTAG00000025634	FMN1
	44551357	44651357	10	ENSBTAG00000031707	FRMD6
	46588835	46688835	10	ENSBTAG00000019390	CA12
	47895151	47995151	10	ENSBTAG00000020814	C2CD4B
	67576007	67676007	10	ENSBTAG00000002326	LGALS3
	79446312	79546312	10	ENSBTAG00000018297/ENSBTAG00000001945	PLEKHH1/ARG2
	83064112	83164112	10	ENSBTAG00000015805	SIPA1L1
	84441671	84541671	10	ENSBTAG00000008713	DCAF4
	85378422	85478422	10	ENSBTAG00000018467/ENSBTAG00000030557	BBOF1/LIN52
	86192499	86292499	10	ENSBTAG00000008664	EIF2B2
	86749458	86849458	10	ENSBTAG00000040078	FLVCR2
	88260081	88360081	10	ENSBTAG00000009923	CIPC
	1506094	1606094	11	ENSBTAG00000021181	BUB1
	5756008	5856008	11	ENSBTAG00000019697	NPAS2
	6571626	6671626	11	ENSBTAG00000013023	MAP4K4
	6879912	6979912	11	ENSBTAG00000005273	IL1R1
	7164239	7264239	11	ENSBTAG00000018571/ENSBTAG00000001034/ENSBTAG00000033748/ENSBTAG00000024075	IL1RL1/IL18R1/IL18RAP/SLC9A4
	7490560	7590560	11	ENSBTAG00000038462	TMEM182
	9060713	9160713	11	ENSBTAG00000006150	MRPS9
	37683470	37783470	11	ENSBTAG00000011101	EML6
	46828517	46928517	11	ENSBTAG00000019665/ENSBTAG00000019072	IL1RN/PSD4
	48339954	48439954	11	ENSBTAG00000013589	CHMP3
	51610353	51710353	11	ENSBTAG00000042855	SNORA72
	63359930	63459930	11	ENSBTAG00000007763/ENSBTAG00000016717	SLC1A4/CEP68
	68070700	68170700	11	ENSBTAG00000001105	ANXA4
	74364798	74464798	11	ENSBTAG00000018705/ENSBTAG00000015012	ADCY3/PTRHD1
	77861153	77961153	11	ENSBTAG00000008505	APOB
	82932779	83032779	11	ENSBTAG00000014081/ENSBTAG00000001076/ENSBTAG00000016722	NBAS/NLRP6/PGGHG
	88366017	88466017	11	ENSBTAG00000008160	MBOAT2
	92977457	93077457	11	ENSBTAG00000004296	MORN5
	93143697	93243697	11	ENSBTAG00000018426/ENSBTAG00000006716	MRRF/PTGS1
	100233991	100333991	11	ENSBTAG00000020311	USP20
	100320308	100420308	11	ENSBTAG00000004204	GPR107
	100972540	101072540	11	ENSBTAG00000048071/ENSBTAG00000017976	EXOSC2/ABL1
	104406040	104506040	11	ENSBTAG00000007492/ENSBTAG00000004508	ADAMTSL2/DBH
	105321400	105421400	11	ENSBTAG00000047998	COL5A1
	106691315	106791315	11	ENSBTAG00000007882	CACNA1B
	18707843	18807843	12	ENSBTAG00000020681	FNDC3A
	21107380	21207380	12	ENSBTAG00000008053	WDFY2
	21302699	21402699	12	ENSBTAG00000019863	CCDC70
	24774923	24874923	12	ENSBTAG00000007589	SMAD9
	27694034	27794034	12	ENSBTAG00000021815	STARD13
	32260451	32360451	12	ENSBTAG00000015614	LNX2
	35506098	35606098	12	ENSBTAG00000015943/ENSBTAG00000006177/ENSBTAG00000003314	MICU2/ZDHHC20/SKA3
	66394916	66494916	12	ENSBTAG00000008708	GPC5
	67666235	67766235	12	ENSBTAG00000040347	GPC6
	6772805	6872805	13	ENSBTAG00000017188	ISM1
	19017761	19117761	13	ENSBTAG00000014991	PARD3
	19540132	19640132	13	ENSBTAG00000019866	NRP1
	20321685	20421685	13	ENSBTAG00000043964	ARL5B
	24366810	24466810	13	ENSBTAG00000047752	OTUD1
	69813520	69913520	13	ENSBTAG00000017584	PLCG1
	72792894	72892894	13	ENSBTAG00000012116/ENSBTAG00000018873	HNF4A/TTPAL
	75992839	76092839	13	ENSBTAG00000007489	NCOA3
	81019871	81119871	13	ENSBTAG00000007917	TSHZ2
	13899095	13999095	14	ENSBTAG00000026172	LRATD2
	19943440	20043440	14	ENSBTAG00000038286	PPDPFL
	20556100	20656100	14	ENSBTAG00000002448	SNTG1
	32125300	32225300	14	ENSBTAG00000022169	PREX2
	36006525	36106525	14	ENSBTAG00000040496/ENSBTAG00000054013	KCNB2/bta-mir-1603
	47565069	47665069	14	ENSBTAG00000014032	EIF3H
	48808864	48908864	14	ENSBTAG00000017694	TRPS1
	51407342	51507342	14	ENSBTAG00000038281	CSMD3
	60984113	61084113	14	ENSBTAG00000033902	SLC25A32
	63777753	63877753	14	ENSBTAG00000011271/ENSBTAG00000001254	SNX31/ANKRD46
	28948023	29048023	15	ENSBTAG00000015710/ENSBTAG00000006453/ENSBTAG00000019725	CD3E/CD3G/UBE4A
	29063608	29163608	15	ENSBTAG00000019725/ENSBTAG00000007332/ENSBTAG00000018093	UBE4A/ATP5MG/KMT2A
	30744026	30844026	15	ENSBTAG00000021338/ENSBTAG00000021340	OAF/POU2F3
	31994715	32094715	15	ENSBTAG00000014611	SORL1
	35976517	36076517	15	ENSBTAG00000044185	SOX6
	38231190	38331190	15	ENSBTAG00000006556	COPB1
	41253655	41353655	15	ENSBTAG00000002914	GALNT18
	43258530	43358530	15	ENSBTAG00000001607	TMEM41B
	65480435	65580435	15	ENSBTAG00000018261	PDHX
	65667899	65767899	15	ENSBTAG00000011578	CD44
	77310934	77410934	15	ENSBTAG00000018479/ENSBTAG00000018483/ENSBTAG00000055123	PTPMT1/NDUFS3/FAM180B
	82267986	82367986	15	ENSBTAG00000004046	DTX4
	1221058	1321058	16	ENSBTAG00000017834/ENSBTAG00000013764	PRELP/OPTC
	3971893	4071893	16	ENSBTAG00000001483	SRGAP2
	4560955	4660955	16	ENSBTAG00000006692/ENSBTAG00000002757	IL19/IL20
	23935319	24035319	16	ENSBTAG00000010460	MARK1
	30912706	31012706	16	ENSBTAG00000033180	SMYD3
	36064564	36164564	16	ENSBTAG00000009938	XCL1
	38215003	38315003	16	ENSBTAG00000004570	PRRX1
	47218530	47318530	16	ENSBTAG00000040477	CHD5
	51386142	51486142	16	ENSBTAG00000014511/ENSBTAG00000046758/ENSBTAG00000014705	C16H1orf159/RNF223/HES4
	60401357	60501357	16	ENSBTAG00000013999/ENSBTAG00000014006	FAM20B/TOR3A
	70856202	70956202	16	ENSBTAG00000011982	BATF3
	71532546	71632546	16	ENSBTAG00000018548/ENSBTAG00000005137	INTS7/LPGAT1
	75255757	75355757	16	ENSBTAG00000001173	PLXNA2
	75640887	75740887	16	ENSBTAG00000051920/ENSBTAG00000051791	bta-mir-29b-2/bta-mir-29d
	77210672	77310672	16	ENSBTAG00000016943	NEK7
	2831443	2931443	17	ENSBTAG00000006745/ENSBTAG00000001638/ENSBTAG00000007234	FGG/FGA/PLRG1
	7507992	7607992	17	ENSBTAG00000018546	LRBA
	11701720	11801720	17	ENSBTAG00000034522	SLC10A7
	19773070	19873070	17	ENSBTAG00000046209	U1
	47848312	47948312	17	ENSBTAG00000002950	TMEM132D
	53017783	53117783	17	ENSBTAG00000016779	CLIP1
	53130044	53230044	17	ENSBTAG00000004203/ENSBTAG00000004199	VPS33A/DIABLO
	54895167	54995167	17	ENSBTAG00000008571	CUX2
	58857025	58957025	17	ENSBTAG00000001888	MED13L
	62404044	62504044	17	ENSBTAG00000003696	BICDL1
	62841304	62941304	17	ENSBTAG00000015767/ENSBTAG00000020049/ENSBTAG00000020050	RNF10/CABP1/MLEC
	69004924	69104924	17	ENSBTAG00000001030	MTMR3
	71738904	71838904	17	ENSBTAG00000036113	RSPH14
	72130821	72230821	17	ENSBTAG00000005951	HIC2
	72364626	72464626	17	ENSBTAG00000019244/ENSBTAG00000002130	P2RX6/SMPD4
	2814232	2914232	18	ENSBTAG00000006550	GABARAPL2
	2921984	3021984	18	ENSBTAG00000015686	TERF2IP
	5671529	5771529	18	ENSBTAG00000015894	WWOX
	8299174	8399174	18	ENSBTAG00000002103	PLCG2
	9991432	10091432	18	ENSBTAG00000034373	CDH13
	11812574	11912574	18	ENSBTAG00000017824	IRF8
	12897633	12997633	18	ENSBTAG00000011632	MAP1LC3B
	14030722	14130722	18	ENSBTAG00000019184	TRAPPC2L
	14134741	14234741	18	ENSBTAG00000015968	ACSF3
	15759537	15859537	18	ENSBTAG00000052618	U6
	23899849	23999849	18	ENSBTAG00000003353/ENSBTAG00000011021	SLC6A2/CES1
	40855255	40955255	18	ENSBTAG00000007262	ZNF536
	43316348	43416348	18	ENSBTAG00000010403	FAAP24
	43564762	43664762	18	ENSBTAG00000031810/ENSBTAG00000047062	WDR88/LRP3
	47945842	48045842	18	ENSBTAG00000018225	SIPA1L3
	48277929	48377929	18	ENSBTAG00000006999	RYR1
	48566951	48666951	18	ENSBTAG00000001778/ENSBTAG00000001782	NFKBIB/MRPS12
	49475635	49575635	18	ENSBTAG00000009414	PSMC4
	51569660	51669660	18	ENSBTAG00000003886/ENSBTAG00000018882/ENSBTAG00000023434	BSP3/BSP5/BSP1
	52037186	52137186	18	ENSBTAG00000012522/ENSBTAG00000026263/ENSBTAG00000050035/ENSBTAG00000049610	ZNF283/ZNF45/ZNF226/ZNF234
	52666347	52766347	18	ENSBTAG00000020560/ENSBTAG00000038428/ENSBTAG00000013697/ENSBTAG00000010668/ENSBTAG00000018834	CLPTM1/RELB/CLASRP/GEMIN7/PPP1R37
	55540144	55640144	18	ENSBTAG00000013343/ENSBTAG00000023417/ENSBTAG00000001996/ENSBTAG00000023415/ENSBTAG00000002844	FTL/RUVBL2/SNRNP70/LIN7B/PPFIA3
	62015073	62115073	18	ENSBTAG00000051978/ENSBTAG00000015950/ENSBTAG00000008932/ENSBTAG00000009211	C19orf85/ISOC2/SHISA7/UBE2S
	65718024	65818024	18	ENSBTAG00000038534/ENSBTAG00000006422	ZNF446/TRIM28
	13733550	13833550	19	ENSBTAG00000014677/ENSBTAG00000010279	TADA2A/DUSP14
	17248218	17348218	19	ENSBTAG00000015527	MYO1D
	19384437	19484437	19	ENSBTAG00000006846	LGALS9
	20345816	20445816	19	ENSBTAG00000007946	PIPOX
	21095204	21195204	19	ENSBTAG00000019122	EFCAB5
	22250584	22350584	19	ENSBTAG00000044395/ENSBTAG00000006606/ENSBTAG00000039819	bta-mir-2336/RFLNB/RPH3AL
	25240738	25340738	19	ENSBTAG00000015593/ENSBTAG00000002982	KIAA0753/PITPNM3
	27479791	27579791	19	ENSBTAG00000008605/ENSBTAG00000048062/ENSBTAG00000014693/ENSBTAG00000051958/ENSBTAG00000014377	DNAH2/KDM6B/TMEM88/CYB5D1/CHD3
	27837581	27937581	19	ENSBTAG00000031509/ENSBTAG00000018809/ENSBTAG00000020688	PFAS/RANGRF/ARHGEF15
	33400891	33500891	19	ENSBTAG00000013271/ENSBTAG00000044099	NCOR1/ZSWIM7
	40166403	40266403	19	ENSBTAG00000030523	ZPBP2
	41876734	41976734	19	ENSBTAG00000002282/ENSBTAG00000017663	EIF1/GAST
	42177236	42277236	19	ENSBTAG00000024979	HSPB9
	42646815	42746815	19	ENSBTAG00000046670/ENSBTAG00000048152/ENSBTAG00000030347/ENSBTAG00000019097	MLX/TUBG1/TUBG2/CNTNAP1
	44381617	44481617	19	ENSBTAG00000039485/ENSBTAG00000005696	MEIOC/DBF4B
	44758197	44858197	19	ENSBTAG00000006051/ENSBTAG00000006054/ENSBTAG00000006056/ENSBTAG00000024974	NMT1/ACBD4/HEXIM1/HEXIM2
	45188884	45288884	19	ENSBTAG00000024942	RPRML
	47957453	48057453	19	ENSBTAG00000008151/ENSBTAG00000021058	MAP3K3/DDX42
	51395450	51495450	19	ENSBTAG00000018271/ENSBTAG00000019972	SLC38A10/TEPSIN
	53158781	53258781	19	ENSBTAG00000006280	RBFOX3
	53596934	53696934	19	ENSBTAG00000006663/ENSBTAG00000000920	CYTH1/DNAH17
	54949876	55049876	19	ENSBTAG00000018258	SRSF2
	55671945	55771945	19	ENSBTAG00000030174/ENSBTAG00000030175/ENSBTAG00000022009/ENSBTAG00000022006/ENSBTAG00000018920/ENSBTAG00000008634/ENSBTAG00000013556	ACOX1/FBF1/MRPL38/TRIM65/TRIM47/WBP2/UNC13D
	57048859	57148859	19	ENSBTAG00000030166	BTBD17
	15203542	15303542	20	ENSBTAG00000029760	bta-mir-320a-2
	19537484	19637484	20	ENSBTAG00000036375	bta-mir-582
	28616912	28716912	20	ENSBTAG00000044010	EMB
	33383160	33483160	20	ENSBTAG00000014177/ENSBTAG00000001997	C6/MROH2B
	53314573	53414573	20	ENSBTAG00000037844	CDH18
	56559171	56659171	20	ENSBTAG00000016444	RETREG1
	61995330	62095330	20	ENSBTAG00000017222	CTNND2
	62865139	62965139	20	ENSBTAG00000010801	CMBL
	71095037	71195037	20	ENSBTAG00000015843/ENSBTAG00000001329/ENSBTAG00000012567	SLC6A3/CLPTM1L/TERT
	7811393	7911393	21	ENSBTAG00000021527	IGF1R
	22640957	22740957	21	ENSBTAG00000015909	PDE8A
	30731415	30831415	21	ENSBTAG00000012909/ENSBTAG00000002504	CRABP1/IREB2
	30837167	30937167	21	ENSBTAG00000002504/ENSBTAG00000001786/ENSBTAG00000014440	IREB2/HYKK/PSMA4
	32494201	32594201	21	ENSBTAG00000020441	HMG20A
	34115847	34215847	21	ENSBTAG00000000010	UBL7
	43067013	43167013	21	ENSBTAG00000017719	AKAP6
	61624924	61724924	21	ENSBTAG00000014230	VRK1
	64732256	64832256	21	ENSBTAG00000013491	EML1
	2738566	2838566	22	ENSBTAG00000035286	CMC1
	10826925	10926925	22	ENSBTAG00000016563/ENSBTAG00000016566	GOLGA4/ITGA9
	29804903	29904903	22	ENSBTAG00000019330	PROK2
	47113956	47213956	22	ENSBTAG00000010027	CHDH
	51130659	51230659	22	ENSBTAG00000014205/ENSBTAG00000021853/ENSBTAG00000021850/ENSBTAG00000021846	PRKAR2A/IP6K2/NCKIPSD/CELSR3
	52718833	52818833	22	ENSBTAG00000031447/ENSBTAG00000017812	PRSS45/ALS2CL
	56295412	56395412	22	ENSBTAG00000021645/ENSBTAG00000021643/ENSBTAG00000015283/ENSBTAG00000000161	MBD4/EFCAB12/RPL32/TMEM40
	7407298	7507298	23	ENSBTAG00000002648/ENSBTAG00000025669/ENSBTAG00000010723	RPS18/B3GALT4/PFDN6
	11977791	12077791	23	ENSBTAG00000000527	ZFAND3
	12469690	12569690	23	ENSBTAG00000014063	DNAH8
	15295878	15395878	23	ENSBTAG00000014211	FOXP4
	15606140	15706140	23	ENSBTAG00000010101	BYSL
	16303481	16403481	23	ENSBTAG00000005967	UBR2
	50215078	50315078	23	ENSBTAG00000026919	PXDC1
	50278541	50378541	23	ENSBTAG00000010943	SLC22A23
	50638170	50738170	23	ENSBTAG00000050155	SERPINB6
	5004955	5104955	24	ENSBTAG00000012889	NETO1
	19574509	19674509	24	ENSBTAG00000004940	CELF4
	33451960	33551960	24	ENSBTAG00000044678	bta-mir-2285o-3
	35078782	35178782	24	ENSBTAG00000008403/ENSBTAG00000019214	ROCK1/USP14
	40711481	40811481	24	ENSBTAG00000024015	PTPRM
	43049447	43149447	24	ENSBTAG00000010552	PSMG2
	46124116	46224116	24	ENSBTAG00000001128	RNF165
	55987219	56087219	24	ENSBTAG00000004005	WDR7
	637508	737508	25	ENSBTAG00000000177/ENSBTAG00000019743	MSLN/CHTF18
	1315841	1415841	25	ENSBTAG00000002211/ENSBTAG00000016553/ENSBTAG00000016561/ENSBTAG00000033015	MAPK8IP3/EME2/NUBP2/FAHD1
	6474292	6574292	25	ENSBTAG00000007210	RBFOX1
	14414084	14514084	25	ENSBTAG00000021090	ABCC1
	17147385	17247385	25	ENSBTAG00000003960/ENSBTAG00000019412	CCP110/VPS35L
	21369593	21469593	25	ENSBTAG00000012541	CHP2
	21995818	22095818	25	ENSBTAG00000001404	CACNG3
	27953780	28053780	25	ENSBTAG00000037489	CRCP
	35859653	35959653	25	ENSBTAG00000015738/ENSBTAG00000008295/ENSBTAG00000011738	GIGYF1/ACTL6B/TFR2
	37764617	37864617	25	ENSBTAG00000051678	TECPR1
	40356561	40456561	25	ENSBTAG00000014698	CARD11
	20262810	20362810	26	ENSBTAG00000011956	CNNM1
	21313670	21413670	26	ENSBTAG00000012914	WNT8B
	29120744	29220744	26	ENSBTAG00000049283	bta-mir-2285k-4
	30765555	30865555	26	ENSBTAG00000017263	MXI1
	33141302	33241302	26	ENSBTAG00000050055	VTI1A
	15515782	15615782	27	ENSBTAG00000010351	SNX25
	17626145	17726145	27	ENSBTAG00000008639	TRIML1
	19087853	19187853	27	ENSBTAG00000007089	FRG1
	23622435	23722435	27	ENSBTAG00000015541	DLC1
	34116163	34216163	27	ENSBTAG00000003509/ENSBTAG00000019532/ENSBTAG00000017455	PLEKHA2/HTRA4/ADAM9
	35180645	35280645	27	ENSBTAG00000033304	TCIM
	37463923	37563923	27	ENSBTAG00000014050	CHRNB3
	37975744	38075744	27	ENSBTAG00000004613	CSGALNACT1
	39965948	40065948	27	ENSBTAG00000003793/ENSBTAG00000044625	NGLY1/bta-mir-2401
	44313069	44413069	27	ENSBTAG00000050535	ZNF385D
	3991876	4091876	28	ENSBTAG00000010773/ENSBTAG00000006112	GNPAT/SPRTN
	4358535	4458535	28	ENSBTAG00000047434/ENSBTAG00000050839	TSNAX/DISC1
	24669677	24769677	28	ENSBTAG00000017509/ENSBTAG00000014316	MYPN/HNRNPH3
	25676782	25776782	28	ENSBTAG00000012380	HK1
	27427255	27527255	28	ENSBTAG00000014270/ENSBTAG00000046357	UNC5B/SLC29A3
	27465747	27565747	28	ENSBTAG00000046357	SLC29A3
	29889938	29989938	28	ENSBTAG00000021879	VCL
	37574697	37674697	28	ENSBTAG00000009587	NRG3
	41848328	41948328	28	ENSBTAG00000004760	PPYR1
	9492296	9592296	29	ENSBTAG00000001657	PICALM
	9864372	9964372	29	ENSBTAG00000000457/ENSBTAG00000000455	CCDC89/CREBZF
	10730803	10830803	29	ENSBTAG00000049234	bta-mir-2285k-1
	11280233	11380233	29	ENSBTAG00000027868	DLG2
	16954428	17054428	29	ENSBTAG00000007439	TENM4
	17626805	17726805	29	ENSBTAG00000002922	GAB2
	26309076	26409076	29	ENSBTAG00000005147	HPS5
	28858928	28958928	29	ENSBTAG00000000052	PKNOX2
	29488314	29588314	29	ENSBTAG00000012169	FAM118B
	42405680	42505680	29	ENSBTAG00000048264/ENSBTAG00000015663	FLRT1/STIP1
	43139370	43239370	29	ENSBTAG00000007061/ENSBTAG00000002238	PPP2R5B/ARL2
	43602252	43702252	29	ENSBTAG00000002039	FRMD8
	44919518	45019518	29	ENSBTAG00000022246/ENSBTAG00000003369	C29H11orf86/SYT12
	49143203	49243203	29	ENSBTAG00000046662	TRPM5
HOLSTEIN	6104638	6204638	1	ENSBTAG00000034854/ENSBTAG00000034854	GRIK1
	44093107	44193107	1	ENSBTAG00000013663	CMSS1
	50061414	50161414	1	ENSBTAG00000000088	ALCAM
	64451909	64551909	1	ENSBTAG00000001293/ENSBTAG00000044376	MAATS1
	82126939	82226939	1	ENSBTAG00000053175	U6
	84061692	84161692	1	ENSBTAG00000012797	DCUN1D1
	87523900	87623900	1	ENSBTAG00000002462	MRPL47
	101976796	102076796	1	ENSBTAG00000044337	RNaseP_nuc
	123745324	123845324	1	ENSBTAG00000043802	5S_rRNA
	130914390	131014390	1	ENSBTAG00000019949/ENSBTAG00000001451	DBR1/A4GNT
	136983675	137083675	1	ENSBTAG00000031010	ACAD11
	148919868	149019868	1	ENSBTAG00000021447	SIM2
	14841026	14941026	2	ENSBTAG00000001755	NEUROD1
	22554508	22654508	2	ENSBTAG00000006970	OLA1
	34179500	34279500	2	ENSBTAG00000008140	FAP
	38190106	38290106	2	ENSBTAG00000004267	CCDC148
	61361345	61461345	2	ENSBTAG00000009949	DARS1
	61561083	61661083	2	ENSBTAG00000015170	LCT
	76709957	76809957	2	ENSBTAG00000031898	CNTNAP5
	94652739	94752739	2	ENSBTAG00000019694	ADAM23
	121306910	121406910	2	ENSBTAG00000009163/ENSBTAG00000019486	TMEM234/CLDN12
	126076854	126176854	2	ENSBTAG00000008766	SLC9A1
	126199559	126299559	2	ENSBTAG00000018413/ENSBTAG00000019252	TENT5B/KDF1
	126714887	126814887	2	ENSBTAG00000009631/ENSBTAG00000005629/ENSBTAG00000009581	ZNF683/CRYBG2/UBXN11
	129240171	129340171	2	ENSBTAG00000030425/ENSBTAG00000014400	ID3/E2F2
	130602581	130702581	2	ENSBTAG00000051083	WNT4
	131645670	131745670	2	ENSBTAG00000040215	EIF4G3
	131856865	131956865	2	ENSBTAG00000018656/ENSBTAG00000001082/ENSBTAG00000017644	HP1BP3/SH2D5/KIF17
	135701326	135801326	2	ENSBTAG00000013281/ENSBTAG00000008510	SPATA21/FBXO42
	14888161	14988161	3	ENSBTAG00000020356	GON4L
	15095012	15195012	3	ENSBTAG00000003954	ASH1L
	15375797	15475797	3	ENSBTAG00000014393/ENSBTAG00000012094/ENSBTAG00000047731/ENSBTAG00000014841/ENSBTAG00000000057/ENSBTAG00000017104/ENSBTAG00000010617/ENSBTAG00000003535	CLK2/SCAMP3/FAM189B/GBA/THBS3/MUC1/KRTCAP2/DPM3
	15988595	16088595	3	ENSBTAG00000007519/ENSBTAG00000007515/ENSBTAG00000020542	ADAR/UBE2Q1/SHE
	22574014	22674014	3	ENSBTAG00000052379	U1
	25073760	25173760	3	ENSBTAG00000001080	SPAG17
	91187656	91287656	3	ENSBTAG00000016990	USP24
	92611872	92711872	3	ENSBTAG00000017986	GLIS1
	93967640	94067640	3	ENSBTAG00000002719/ENSBTAG00000015896	ORC1/CC2D1B
	95377776	95477776	3	ENSBTAG00000014482	FAF1
	105457423	105557423	3	ENSBTAG00000018726	RIMS3
	8201640	8301640	4	ENSBTAG00000048664	CDK14
	27051116	27151116	4	ENSBTAG00000003808	HDAC9
	60274045	60374045	4	ENSBTAG00000003490	ELMO1
[truncated: 4,710 more rows]

## Sheet: Table S5
Table S5. Candidate genes identified between methods for thermal tolerance in eight local Chinese cattle and Datong yak populations.
Methods	Start position (Mb)	End position (Mb)	Chr	Gene ID	Gene name
FST1 and hapFLK (outgroup - Yak)	45187046	45437461	10	ENSBTAG00000007638/ENSBTAG00000011037	PIF1/RBPMS2
FST2 and hapFLK (outgroup - Yak)	45218481	45437461	10	ENSBTAG00000011037/ENSBTAG00000015806	RBPMS2/OAZ2
	45637660	45884171	10	ENSBTAG00000016823	CSNK1G1
FST3 and hapFLK (outgroup - Yak)	45187046	45437461	10	ENSBTAG00000007638/ENSBTAG00000011037	PIF1/RBPMS2
	45891254	46158878	10	ENSBTAG00000011820	DAPK2
FST1 and hapFLK (No outgroup)
FST2 and hapFLK (No outgroup)
FST3 and hapFLK (No outgroup)	421078	566404	1	ENSBTAG00000049697/ENSBTAG00000047028	5S_rRNA/5S_rRNA
	44929377	45049264	29	ENSBTAG00000022246/ENSBTAG00000003369	C29H11orf86/SYT12
FST1 and ROH	9672196	91981829	1	ENSBTAG00000001535/ENSBTAG00000051908/ENSBTAG00000029106/ENSBTAG00000017115/ENSBTAG00000010462/ENSBTAG00000050198/ENSBTAG00000009219/ENSBTAG00000007939/ENSBTAG00000024027/ENSBTAG00000015069/ENSBTAG00000013464/ENSBTAG00000005071/ENSBTAG00000018877/ENSBTAG00000012347	LIPH/1/5S_rRNA/TMEM41A/ROBO2/1/CADM2/CHMP2B/TRMT10C/PCNP/CEP97/SLC49A4/PDIA5/SLC51A
	15976386	44643255	1	ENSBTAG00000010462/ENSBTAG00000009219/ENSBTAG00000007939	ROBO2/CADM2/CHMP2B
	18170722	69716858	1	ENSBTAG00000010462/ENSBTAG00000009219/ENSBTAG00000007939/ENSBTAG00000024027/ENSBTAG00000015069/ENSBTAG00000013464/ENSBTAG00000005071/ENSBTAG00000018877	ROBO2/CADM2/CHMP2B/TRMT10C/PCNP/CEP97/SLC49A4/PDIA5
	23008775	119290545	1	ENSBTAG00000001535/ENSBTAG00000051908/ENSBTAG00000029106/ENSBTAG00000017115/ENSBTAG00000010462/ENSBTAG00000050198/ENSBTAG00000009219/ENSBTAG00000007939/ENSBTAG00000024027/ENSBTAG00000015069/ENSBTAG00000013464/ENSBTAG00000008307/ENSBTAG00000020990/ENSBTAG00000009848/ENSBTAG00000005071/ENSBTAG00000018877/ENSBTAG00000012347	LIPH/1/5S_rRNA/TMEM41A/ROBO2/1/CADM2/CHMP2B/TRMT10C/PCNP/CEP97/PLCH1/P2RY14/GPR171/SLC49A4/PDIA5/SLC51A
	26873390	48347264	1	ENSBTAG00000009219/ENSBTAG00000007939/ENSBTAG00000024027/ENSBTAG00000015069/ENSBTAG00000013464	CADM2/CHMP2B/TRMT10C/PCNP/CEP97
	26873390	100878144	1	ENSBTAG00000001535/ENSBTAG00000051908/ENSBTAG00000029106/ENSBTAG00000017115/ENSBTAG00000050198/ENSBTAG00000009219/ENSBTAG00000007939/ENSBTAG00000024027/ENSBTAG00000015069/ENSBTAG00000013464/ENSBTAG00000005071/ENSBTAG00000018877/ENSBTAG00000012347	LIPH/1/5S_rRNA/TMEM41A/1/CADM2/CHMP2B/TRMT10C/PCNP/CEP97/SLC49A4/PDIA5/SLC51A
	33353035	82359625	1	ENSBTAG00000001535/ENSBTAG00000051908/ENSBTAG00000029106/ENSBTAG00000017115/ENSBTAG00000009219/ENSBTAG00000007939/ENSBTAG00000024027/ENSBTAG00000015069/ENSBTAG00000013464/ENSBTAG00000005071/ENSBTAG00000018877/ENSBTAG00000012347	LIPH/1/5S_rRNA/TMEM41A/CADM2/CHMP2B/TRMT10C/PCNP/CEP97/SLC49A4/PDIA5/SLC51A
	39285042	89227162	1	ENSBTAG00000001535/ENSBTAG00000051908/ENSBTAG00000029106/ENSBTAG00000017115/ENSBTAG00000024027/ENSBTAG00000015069/ENSBTAG00000013464/ENSBTAG00000005071/ENSBTAG00000018877/ENSBTAG00000012347	LIPH/1/5S_rRNA/TMEM41A/TRMT10C/PCNP/CEP97/SLC49A4/PDIA5/SLC51A
	46011015	53133677	1	ENSBTAG00000015069/ENSBTAG00000013464	PCNP/CEP97
	46018587	124043522	1	ENSBTAG00000001535/ENSBTAG00000051908/ENSBTAG00000029106/ENSBTAG00000017115/ENSBTAG00000050198/ENSBTAG00000013464/ENSBTAG00000008307/ENSBTAG00000020990/ENSBTAG00000009848/ENSBTAG00000005071/ENSBTAG00000018877/ENSBTAG00000012347	LIPH/1/5S_rRNA/TMEM41A/1/CEP97/PLCH1/P2RY14/GPR171/SLC49A4/PDIA5/SLC51A
	46038017	47223888	1	ENSBTAG00000013464	CEP97
	63277846	75433980	1	ENSBTAG00000005071/ENSBTAG00000018877/ENSBTAG00000012347	SLC49A4/PDIA5/SLC51A
	67286095	74917513	1	ENSBTAG00000018877/ENSBTAG00000012347	PDIA5/SLC51A
	69821698	92331878	1	ENSBTAG00000001535/ENSBTAG00000051908/ENSBTAG00000029106/ENSBTAG00000017115/ENSBTAG00000050198/ENSBTAG00000012347	LIPH/1/5S_rRNA/TMEM41A/1/SLC51A
	94214604	133183163	1	ENSBTAG00000008307/ENSBTAG00000020990/ENSBTAG00000009848/ENSBTAG00000019949/ENSBTAG00000001451/ENSBTAG00000015198	PLCH1/P2RY14/GPR171/DBR1/A4GNT/DZIP1L
	95297194	158229218	1	ENSBTAG00000021270/ENSBTAG00000008167/ENSBTAG00000008307/ENSBTAG00000020990/ENSBTAG00000009848/ENSBTAG00000019949/ENSBTAG00000001451/ENSBTAG00000015198/ENSBTAG00000016999/ENSBTAG00000005769/ENSBTAG00000050138	UMODL1/TTC3/PLCH1/P2RY14/GPR171/DBR1/A4GNT/DZIP1L/RYK/NPHP3/1
	110260240	119374036	1	ENSBTAG00000008307/ENSBTAG00000020990/ENSBTAG00000009848	PLCH1/P2RY14/GPR171
	114571823	143711195	1	ENSBTAG00000021270/ENSBTAG00000020990/ENSBTAG00000009848/ENSBTAG00000019949/ENSBTAG00000001451/ENSBTAG00000015198/ENSBTAG00000016999/ENSBTAG00000005769/ENSBTAG00000050138	UMODL1/P2RY14/GPR171/DBR1/A4GNT/DZIP1L/RYK/NPHP3/1
	116770144	119266614	1	ENSBTAG00000020990/ENSBTAG00000009848	P2RY14/GPR171
	125725305	138528244	1	ENSBTAG00000019949/ENSBTAG00000001451/ENSBTAG00000015198/ENSBTAG00000016999/ENSBTAG00000005769	DBR1/A4GNT/DZIP1L/RYK/NPHP3
	125793701	145258083	1	ENSBTAG00000021270/ENSBTAG00000019949/ENSBTAG00000001451/ENSBTAG00000015198/ENSBTAG00000016999/ENSBTAG00000005769/ENSBTAG00000050138	UMODL1/DBR1/A4GNT/DZIP1L/RYK/NPHP3/1
	125793701	151665620	1	ENSBTAG00000021270/ENSBTAG00000008167/ENSBTAG00000019949/ENSBTAG00000001451/ENSBTAG00000015198/ENSBTAG00000016999/ENSBTAG00000005769/ENSBTAG00000050138	UMODL1/TTC3/DBR1/A4GNT/DZIP1L/RYK/NPHP3/1
	126634308	142216666	1	ENSBTAG00000019949/ENSBTAG00000001451/ENSBTAG00000015198/ENSBTAG00000016999/ENSBTAG00000005769/ENSBTAG00000050138	DBR1/A4GNT/DZIP1L/RYK/NPHP3/1
	130168696	132896318	1	ENSBTAG00000019949/ENSBTAG00000001451/ENSBTAG00000015198	DBR1/A4GNT/DZIP1L
	131865531	142634403	1	ENSBTAG00000021270/ENSBTAG00000016999/ENSBTAG00000005769/ENSBTAG00000050138	UMODL1/RYK/NPHP3/1
	133090678	138713450	1	ENSBTAG00000016999/ENSBTAG00000005769	RYK/NPHP3
	133113456	158229218	1	ENSBTAG00000021270/ENSBTAG00000008167/ENSBTAG00000016999/ENSBTAG00000005769/ENSBTAG00000050138	UMODL1/TTC3/RYK/NPHP3/1
	134666688	139787079	1	ENSBTAG00000016999/ENSBTAG00000005769/ENSBTAG00000050138	RYK/NPHP3/1
	135301958	158855123	1	ENSBTAG00000021270/ENSBTAG00000008167/ENSBTAG00000005769/ENSBTAG00000050138	UMODL1/TTC3/NPHP3/1
	139867282	154682450	1	ENSBTAG00000021270/ENSBTAG00000008167	UMODL1/TTC3
	35126	21323746	2	ENSBTAG00000015834/ENSBTAG00000033662/ENSBTAG00000052709/ENSBTAG00000001097/ENSBTAG00000054850	ARHGEF4/NCKAP1/2/FKBP7/2
	55364	89978495	2	ENSBTAG00000000730/ENSBTAG00000048246/ENSBTAG00000049997/ENSBTAG00000044916/ENSBTAG00000001887/ENSBTAG00000015834/ENSBTAG00000024632/ENSBTAG00000033662/ENSBTAG00000048356/ENSBTAG00000005238/ENSBTAG00000007111/ENSBTAG00000009517/ENSBTAG00000026825/ENSBTAG00000052709/ENSBTAG00000001097/ENSBTAG00000054850/ENSBTAG00000053930	GCG/DPP4/2/5S_rRNA/STAM2/ARHGEF4/LRP1B/NCKAP1/2/NCKAP5/STEAP3/DBI/TMEM37/2/FKBP7/2/2
	160777	30842686	2	ENSBTAG00000015834/ENSBTAG00000033662/ENSBTAG00000052709/ENSBTAG00000001097/ENSBTAG00000054850/ENSBTAG00000053930	ARHGEF4/NCKAP1/2/FKBP7/2/2
	464800	52586184	2	ENSBTAG00000000730/ENSBTAG00000048246/ENSBTAG00000049997/ENSBTAG00000044916/ENSBTAG00000001887/ENSBTAG00000015834/ENSBTAG00000033662/ENSBTAG00000052709/ENSBTAG00000001097/ENSBTAG00000054850/ENSBTAG00000053930	GCG/DPP4/2/5S_rRNA/STAM2/ARHGEF4/NCKAP1/2/FKBP7/2/2
	1480460	36393032	2	ENSBTAG00000000730/ENSBTAG00000048246/ENSBTAG00000015834/ENSBTAG00000033662/ENSBTAG00000052709/ENSBTAG00000001097/ENSBTAG00000054850/ENSBTAG00000053930	GCG/DPP4/ARHGEF4/NCKAP1/2/FKBP7/2/2
	2989016	48116316	2	ENSBTAG00000000730/ENSBTAG00000048246/ENSBTAG00000049997/ENSBTAG00000044916/ENSBTAG00000001887/ENSBTAG00000033662/ENSBTAG00000052709/ENSBTAG00000001097/ENSBTAG00000054850/ENSBTAG00000053930	GCG/DPP4/2/5S_rRNA/STAM2/NCKAP1/2/FKBP7/2/2
	4097755	29275496	2	ENSBTAG00000033662/ENSBTAG00000052709/ENSBTAG00000001097/ENSBTAG00000054850/ENSBTAG00000053930	NCKAP1/2/FKBP7/2/2
	4876321	127917867	2	ENSBTAG00000000730/ENSBTAG00000048246/ENSBTAG00000011964/ENSBTAG00000049997/ENSBTAG00000044916/ENSBTAG00000001887/ENSBTAG00000024632/ENSBTAG00000033662/ENSBTAG00000048356/ENSBTAG00000005238/ENSBTAG00000007111/ENSBTAG00000009517/ENSBTAG00000026825/ENSBTAG00000052709/ENSBTAG00000001097/ENSBTAG00000054850/ENSBTAG00000053930/ENSBTAG00000053833/ENSBTAG00000016662	GCG/DPP4/DIS3L2/2/5S_rRNA/STAM2/LRP1B/NCKAP1/2/NCKAP5/STEAP3/DBI/TMEM37/2/FKBP7/2/2/2/CPS1
	14403663	53113209	2	ENSBTAG00000000730/ENSBTAG00000048246/ENSBTAG00000049997/ENSBTAG00000044916/ENSBTAG00000001887/ENSBTAG00000052709/ENSBTAG00000001097/ENSBTAG00000054850/ENSBTAG00000053930	GCG/DPP4/2/5S_rRNA/STAM2/2/FKBP7/2/2
	15088591	57859683	2	ENSBTAG00000000730/ENSBTAG00000048246/ENSBTAG00000049997/ENSBTAG00000044916/ENSBTAG00000001887/ENSBTAG00000024632/ENSBTAG00000052709/ENSBTAG00000001097/ENSBTAG00000054850/ENSBTAG00000053930	GCG/DPP4/2/5S_rRNA/STAM2/LRP1B/2/FKBP7/2/2
	15088591	90305149	2	ENSBTAG00000000730/ENSBTAG00000048246/ENSBTAG00000049997/ENSBTAG00000044916/ENSBTAG00000001887/ENSBTAG00000024632/ENSBTAG00000048356/ENSBTAG00000005238/ENSBTAG00000007111/ENSBTAG00000009517/ENSBTAG00000026825/ENSBTAG00000052709/ENSBTAG00000001097/ENSBTAG00000054850/ENSBTAG00000053930	GCG/DPP4/2/5S_rRNA/STAM2/LRP1B/2/NCKAP5/STEAP3/DBI/TMEM37/2/FKBP7/2/2
	18437934	58446867	2	ENSBTAG00000000730/ENSBTAG00000048246/ENSBTAG00000049997/ENSBTAG00000044916/ENSBTAG00000001887/ENSBTAG00000024632/ENSBTAG00000054850/ENSBTAG00000053930	GCG/DPP4/2/5S_rRNA/STAM2/LRP1B/2/2
	26734422	29027343	2	ENSBTAG00000053930
	27894603	57800824	2	ENSBTAG00000000730/ENSBTAG00000048246/ENSBTAG00000049997/ENSBTAG00000044916/ENSBTAG00000001887/ENSBTAG00000024632	GCG/DPP4/2/5S_rRNA/STAM2/LRP1B
	29370591	66462711	2	ENSBTAG00000000730/ENSBTAG00000048246/ENSBTAG00000049997/ENSBTAG00000044916/ENSBTAG00000001887/ENSBTAG00000024632/ENSBTAG00000048356/ENSBTAG00000005238	GCG/DPP4/2/5S_rRNA/STAM2/LRP1B/2/NCKAP5
	29370591	110704913	2	ENSBTAG00000000730/ENSBTAG00000048246/ENSBTAG00000049997/ENSBTAG00000044916/ENSBTAG00000001887/ENSBTAG00000024632/ENSBTAG00000048356/ENSBTAG00000005238/ENSBTAG00000007111/ENSBTAG00000009517/ENSBTAG00000026825/ENSBTAG00000053833/ENSBTAG00000016662	GCG/DPP4/2/5S_rRNA/STAM2/LRP1B/2/NCKAP5/STEAP3/DBI/TMEM37/2/CPS1
	30157601	34379341	2	ENSBTAG00000000730	GCG
	32886269	47873555	2	ENSBTAG00000000730/ENSBTAG00000048246/ENSBTAG00000049997/ENSBTAG00000044916/ENSBTAG00000001887	GCG/DPP4/2/5S_rRNA/STAM2
	33433015	36393032	2	ENSBTAG00000000730/ENSBTAG00000048246	GCG/DPP4
	36483235	117893105	2	ENSBTAG00000049997/ENSBTAG00000044916/ENSBTAG00000001887/ENSBTAG00000024632/ENSBTAG00000048356/ENSBTAG00000005238/ENSBTAG00000007111/ENSBTAG00000009517/ENSBTAG00000026825/ENSBTAG00000053833/ENSBTAG00000016662	2/5S_rRNA/STAM2/LRP1B/2/NCKAP5/STEAP3/DBI/TMEM37/2/CPS1
	36522023	89827619	2	ENSBTAG00000049997/ENSBTAG00000044916/ENSBTAG00000001887/ENSBTAG00000024632/ENSBTAG00000048356/ENSBTAG00000005238/ENSBTAG00000007111/ENSBTAG00000009517/ENSBTAG00000026825	2/5S_rRNA/STAM2/LRP1B/2/NCKAP5/STEAP3/DBI/TMEM37
	39350058	46590840	2	ENSBTAG00000044916/ENSBTAG00000001887	5S_rRNA/STAM2
	41386138	58446867	2	ENSBTAG00000044916/ENSBTAG00000001887/ENSBTAG00000024632	5S_rRNA/STAM2/LRP1B
	50632840	79090198	2	ENSBTAG00000024632/ENSBTAG00000048356/ENSBTAG00000005238/ENSBTAG00000007111/ENSBTAG00000009517/ENSBTAG00000026825	LRP1B/2/NCKAP5/STEAP3/DBI/TMEM37
	55346945	64983817	2	ENSBTAG00000024632/ENSBTAG00000048356/ENSBTAG00000005238	LRP1B/2/NCKAP5
	57980393	90305149	2	ENSBTAG00000048356/ENSBTAG00000005238/ENSBTAG00000007111/ENSBTAG00000009517/ENSBTAG00000026825	2/NCKAP5/STEAP3/DBI/TMEM37
	58265805	110704913	2	ENSBTAG00000048356/ENSBTAG00000005238/ENSBTAG00000007111/ENSBTAG00000009517/ENSBTAG00000026825/ENSBTAG00000053833/ENSBTAG00000016662	2/NCKAP5/STEAP3/DBI/TMEM37/2/CPS1
	58677652	136908437	2	ENSBTAG00000011964/ENSBTAG00000008072/ENSBTAG00000030367/ENSBTAG00000007998/ENSBTAG00000048356/ENSBTAG00000005238/ENSBTAG00000007111/ENSBTAG00000009517/ENSBTAG00000026825/ENSBTAG00000053833/ENSBTAG00000016662	DIS3L2/SRSF10/RNF186/TMCO4/2/NCKAP5/STEAP3/DBI/TMEM37/2/CPS1
	61080508	64485917	2	ENSBTAG00000048356/ENSBTAG00000005238	2/NCKAP5
	65866839	113749274	2	ENSBTAG00000007111/ENSBTAG00000009517/ENSBTAG00000026825/ENSBTAG00000053833/ENSBTAG00000016662	STEAP3/DBI/TMEM37/2/CPS1
	67387596	71132639	2	ENSBTAG00000007111	STEAP3
	68691127	71209253	2	ENSBTAG00000007111/ENSBTAG00000009517	STEAP3/DBI
	70322692	73003429	2	ENSBTAG00000007111/ENSBTAG00000009517/ENSBTAG00000026825	STEAP3/DBI/TMEM37
	74805654	99213575	2	ENSBTAG00000053833/ENSBTAG00000016662	2/CPS1
	90527996	123919123	2	ENSBTAG00000011964/ENSBTAG00000053833/ENSBTAG00000016662	DIS3L2/2/CPS1
	90527996	136908437	2	ENSBTAG00000011964/ENSBTAG00000008072/ENSBTAG00000030367/ENSBTAG00000007998/ENSBTAG00000053833/ENSBTAG00000016662	DIS3L2/SRSF10/RNF186/TMCO4/2/CPS1
	97026818	98332316	2	ENSBTAG00000016662	CPS1
	105006704	120073875	2	ENSBTAG00000011964	DIS3L2
	105133414	133914351	2	ENSBTAG00000011964/ENSBTAG00000008072/ENSBTAG00000030367/ENSBTAG00000007998	DIS3L2/SRSF10/RNF186/TMCO4
	111616523	129423599	2	ENSBTAG00000011964/ENSBTAG00000008072	DIS3L2/SRSF10
	120251367	136697236	2	ENSBTAG00000008072/ENSBTAG00000030367/ENSBTAG00000007998	SRSF10/RNF186/TMCO4
	127860492	131372857	2	ENSBTAG00000008072	SRSF10
	130652581	134985418	2	ENSBTAG00000030367/ENSBTAG00000007998	RNF186/TMCO4
	25683	35840206	3	ENSBTAG00000007241/ENSBTAG00000001481/ENSBTAG00000002068/ENSBTAG00000044526/ENSBTAG00000031575/ENSBTAG00000049591/ENSBTAG00000050444/ENSBTAG00000053301/ENSBTAG00000021823/ENSBTAG00000020060/ENSBTAG00000008365/ENSBTAG00000008369/ENSBTAG00000008931	SLAMF9/IGSF9/TAGLN2/bta-mir-1584/VAV3/3/U1/U1/HJV/TXNIP/ANKRD34A/RBM8A/CREG1
	554098	3055673	3	ENSBTAG00000008931	CREG1
	4475884	49099655	3	ENSBTAG00000007241/ENSBTAG00000001481/ENSBTAG00000002068/ENSBTAG00000044526/ENSBTAG00000031575/ENSBTAG00000049591/ENSBTAG00000021217/ENSBTAG00000019026/ENSBTAG00000031358/ENSBTAG00000044378/ENSBTAG00000007101/ENSBTAG00000050444/ENSBTAG00000053301/ENSBTAG00000021823/ENSBTAG00000020060/ENSBTAG00000008365/ENSBTAG00000008369	SLAMF9/IGSF9/TAGLN2/bta-mir-1584/VAV3/3/COL11A1/EXTL2/DPYD/U6/F3/U1/U1/HJV/TXNIP/ANKRD34A/RBM8A
	6211941	9754396	3	ENSBTAG00000007241/ENSBTAG00000001481	SLAMF9/IGSF9
	6211941	80486264	3	ENSBTAG00000007241/ENSBTAG00000001481/ENSBTAG00000002068/ENSBTAG00000044526/ENSBTAG00000031575/ENSBTAG00000049591/ENSBTAG00000021217/ENSBTAG00000019026/ENSBTAG00000031358/ENSBTAG00000044378/ENSBTAG00000007101/ENSBTAG00000018010/ENSBTAG00000007842/ENSBTAG00000003245/ENSBTAG00000050182/ENSBTAG00000050444/ENSBTAG00000053301/ENSBTAG00000021823/ENSBTAG00000020060/ENSBTAG00000008365/ENSBTAG00000008369/…	SLAMF9/IGSF9/TAGLN2/bta-mir-1584/VAV3/3/COL11A1/EXTL2/DPYD/U6/F3/ABCA4/GCLM/BCAR3/3/U1/U1/HJV/TXNIP/ANKRD34A/RBM8A/ODF2L/ADGRL4/PIGK/ANKRD13C/SERBP1
	6235959	103454241	3	ENSBTAG00000017844/ENSBTAG00000043793/ENSBTAG00000052144/ENSBTAG00000005029/ENSBTAG00000002555/ENSBTAG00000007241/ENSBTAG00000001481/ENSBTAG00000002068/ENSBTAG00000044526/ENSBTAG00000002979/ENSBTAG00000012648/ENSBTAG00000031575/ENSBTAG00000049591/ENSBTAG00000021217/ENSBTAG00000019026/ENSBTAG00000031358/ENSBTAG00000044378/ENSBTAG00000007101/ENSBTAG00000018010/ENSBTAG00000007842/ENSBTAG00000003245/…	STIL/5S_rRNA/U6/TAL1/PDZK1IP1/SLAMF9/IGSF9/TAGLN2/bta-mir-1584/PIK3R3/ZSWIM5/VAV3/3/COL11A1/EXTL2/DPYD/U6/F3/ABCA4/GCLM/BCAR3/3/U1/U1/HJV/TXNIP/ANKRD34A/RBM8A/ODF2L/ADGRL4/PIGK/ANKRD13C/SERBP1/ITGB3BP/DAB1/3/3/ECHDC2/TUT4
	7845334	35171770	3	ENSBTAG00000007241/ENSBTAG00000001481/ENSBTAG00000002068/ENSBTAG00000044526/ENSBTAG00000050444/ENSBTAG00000053301/ENSBTAG00000021823/ENSBTAG00000020060/ENSBTAG00000008365/ENSBTAG00000008369	SLAMF9/IGSF9/TAGLN2/bta-mir-1584/U1/U1/HJV/TXNIP/ANKRD34A/RBM8A
	8152513	14246551	3	ENSBTAG00000007241/ENSBTAG00000001481/ENSBTAG00000002068/ENSBTAG00000044526	SLAMF9/IGSF9/TAGLN2/bta-mir-1584
	9722400	41589167	3	ENSBTAG00000007241/ENSBTAG00000001481/ENSBTAG00000002068/ENSBTAG00000044526/ENSBTAG00000031575/ENSBTAG00000049591/ENSBTAG00000021217/ENSBTAG00000050444/ENSBTAG00000053301/ENSBTAG00000021823/ENSBTAG00000020060/ENSBTAG00000008365/ENSBTAG00000008369	SLAMF9/IGSF9/TAGLN2/bta-mir-1584/VAV3/3/COL11A1/U1/U1/HJV/TXNIP/ANKRD34A/RBM8A
	10442584	79282515	3	ENSBTAG00000031575/ENSBTAG00000049591/ENSBTAG00000021217/ENSBTAG00000019026/ENSBTAG00000031358/ENSBTAG00000044378/ENSBTAG00000007101/ENSBTAG00000018010/ENSBTAG00000007842/ENSBTAG00000003245/ENSBTAG00000050182/ENSBTAG00000050444/ENSBTAG00000053301/ENSBTAG00000021823/ENSBTAG00000020060/ENSBTAG00000008365/ENSBTAG00000008369/ENSBTAG00000012907/ENSBTAG00000019733/ENSBTAG00000031012/ENSBTAG00000015482/…	VAV3/3/COL11A1/EXTL2/DPYD/U6/F3/ABCA4/GCLM/BCAR3/3/U1/U1/HJV/TXNIP/ANKRD34A/RBM8A/ODF2L/ADGRL4/PIGK/ANKRD13C/SERBP1
	10462387	35911412	3	ENSBTAG00000031575/ENSBTAG00000049591/ENSBTAG00000050444/ENSBTAG00000053301/ENSBTAG00000021823/ENSBTAG00000020060/ENSBTAG00000008365/ENSBTAG00000008369	VAV3/3/U1/U1/HJV/TXNIP/ANKRD34A/RBM8A
	10547174	67376336	3	ENSBTAG00000031575/ENSBTAG00000049591/ENSBTAG00000021217/ENSBTAG00000019026/ENSBTAG00000031358/ENSBTAG00000044378/ENSBTAG00000007101/ENSBTAG00000018010/ENSBTAG00000007842/ENSBTAG00000003245/ENSBTAG00000050182/ENSBTAG00000050444/ENSBTAG00000053301/ENSBTAG00000021823/ENSBTAG00000020060/ENSBTAG00000008365/ENSBTAG00000008369/ENSBTAG00000012907/ENSBTAG00000019733	VAV3/3/COL11A1/EXTL2/DPYD/U6/F3/ABCA4/GCLM/BCAR3/3/U1/U1/HJV/TXNIP/ANKRD34A/RBM8A/ODF2L/ADGRL4
	10664578	121403393	3	ENSBTAG00000017844/ENSBTAG00000043793/ENSBTAG00000052144/ENSBTAG00000005029/ENSBTAG00000002555/ENSBTAG00000002979/ENSBTAG00000012648/ENSBTAG00000031575/ENSBTAG00000049591/ENSBTAG00000021217/ENSBTAG00000019026/ENSBTAG00000001629/ENSBTAG00000001628/ENSBTAG00000030672/ENSBTAG00000031358/ENSBTAG00000044378/ENSBTAG00000007101/ENSBTAG00000018010/ENSBTAG00000009269/ENSBTAG00000007842/ENSBTAG00000003245/…	STIL/5S_rRNA/U6/TAL1/PDZK1IP1/PIK3R3/ZSWIM5/VAV3/3/COL11A1/EXTL2/SCMH1/SLFNL1/3/DPYD/U6/F3/ABCA4/GRIK3/GCLM/BCAR3/KIAA0319L/3/EFHD1/GIGYF2/U1/U1/HJV/TXNIP/ANKRD34A/RBM8A/ODF2L/3/ADGRL4/PIGK/ANKRD13C/SERBP1/ITGB3BP/DAB1/3/3/ECHDC2/TUT4
	12312362	85520539	3	ENSBTAG00000031575/ENSBTAG00000049591/ENSBTAG00000021217/ENSBTAG00000019026/ENSBTAG00000031358/ENSBTAG00000044378/ENSBTAG00000007101/ENSBTAG00000018010/ENSBTAG00000007842/ENSBTAG00000003245/ENSBTAG00000050182/ENSBTAG00000050444/ENSBTAG00000053301/ENSBTAG00000021823/ENSBTAG00000020060/ENSBTAG00000008365/ENSBTAG00000008369/ENSBTAG00000012907/ENSBTAG00000019733/ENSBTAG00000031012/ENSBTAG00000015482/…	VAV3/3/COL11A1/EXTL2/DPYD/U6/F3/ABCA4/GCLM/BCAR3/3/U1/U1/HJV/TXNIP/ANKRD34A/RBM8A/ODF2L/ADGRL4/PIGK/ANKRD13C/SERBP1/ITGB3BP
	12363085	23479543	3	ENSBTAG00000050444/ENSBTAG00000053301/ENSBTAG00000021823/ENSBTAG00000020060/ENSBTAG00000008365/ENSBTAG00000008369	U1/U1/HJV/TXNIP/ANKRD34A/RBM8A
	13902710	45908322	3	ENSBTAG00000031575/ENSBTAG00000049591/ENSBTAG00000021217/ENSBTAG00000019026/ENSBTAG00000031358/ENSBTAG00000050444/ENSBTAG00000053301/ENSBTAG00000021823/ENSBTAG00000020060/ENSBTAG00000008365/ENSBTAG00000008369	VAV3/3/COL11A1/EXTL2/DPYD/U1/U1/HJV/TXNIP/ANKRD34A/RBM8A
	14502534	89039841	3	ENSBTAG00000031575/ENSBTAG00000049591/ENSBTAG00000021217/ENSBTAG00000019026/ENSBTAG00000031358/ENSBTAG00000044378/ENSBTAG00000007101/ENSBTAG00000018010/ENSBTAG00000007842/ENSBTAG00000003245/ENSBTAG00000050182/ENSBTAG00000050444/ENSBTAG00000053301/ENSBTAG00000021823/ENSBTAG00000020060/ENSBTAG00000008365/ENSBTAG00000008369/ENSBTAG00000012907/ENSBTAG00000019733/ENSBTAG00000031012/ENSBTAG00000015482/…	VAV3/3/COL11A1/EXTL2/DPYD/U6/F3/ABCA4/GCLM/BCAR3/3/U1/U1/HJV/TXNIP/ANKRD34A/RBM8A/ODF2L/ADGRL4/PIGK/ANKRD13C/SERBP1/ITGB3BP/DAB1
	14627679	77712209	3	ENSBTAG00000031575/ENSBTAG00000049591/ENSBTAG00000021217/ENSBTAG00000019026/ENSBTAG00000031358/ENSBTAG00000044378/ENSBTAG00000007101/ENSBTAG00000018010/ENSBTAG00000007842/ENSBTAG00000003245/ENSBTAG00000050182/ENSBTAG00000050444/ENSBTAG00000053301/ENSBTAG00000021823/ENSBTAG00000020060/ENSBTAG00000008365/ENSBTAG00000008369/ENSBTAG00000012907/ENSBTAG00000019733/ENSBTAG00000031012/ENSBTAG00000015482	VAV3/3/COL11A1/EXTL2/DPYD/U6/F3/ABCA4/GCLM/BCAR3/3/U1/U1/HJV/TXNIP/ANKRD34A/RBM8A/ODF2L/ADGRL4/PIGK/ANKRD13C
	14627679	99111024	3	ENSBTAG00000017844/ENSBTAG00000043793/ENSBTAG00000052144/ENSBTAG00000005029/ENSBTAG00000002555/ENSBTAG00000031575/ENSBTAG00000049591/ENSBTAG00000021217/ENSBTAG00000019026/ENSBTAG00000031358/ENSBTAG00000044378/ENSBTAG00000007101/ENSBTAG00000018010/ENSBTAG00000007842/ENSBTAG00000003245/ENSBTAG00000050182/ENSBTAG00000050444/ENSBTAG00000053301/ENSBTAG00000021823/ENSBTAG00000020060/ENSBTAG00000008365/…	STIL/5S_rRNA/U6/TAL1/PDZK1IP1/VAV3/3/COL11A1/EXTL2/DPYD/U6/F3/ABCA4/GCLM/BCAR3/3/U1/U1/HJV/TXNIP/ANKRD34A/RBM8A/ODF2L/ADGRL4/PIGK/ANKRD13C/SERBP1/ITGB3BP/DAB1/3/3/ECHDC2/TUT4
	14627679	103448870	3	ENSBTAG00000017844/ENSBTAG00000043793/ENSBTAG00000052144/ENSBTAG00000005029/ENSBTAG00000002555/ENSBTAG00000002979/ENSBTAG00000012648/ENSBTAG00000031575/ENSBTAG00000049591/ENSBTAG00000021217/ENSBTAG00000019026/ENSBTAG00000031358/ENSBTAG00000044378/ENSBTAG00000007101/ENSBTAG00000018010/ENSBTAG00000007842/ENSBTAG00000003245/ENSBTAG00000050182/ENSBTAG00000050444/ENSBTAG00000053301/ENSBTAG00000021823/…	STIL/5S_rRNA/U6/TAL1/PDZK1IP1/PIK3R3/ZSWIM5/VAV3/3/COL11A1/EXTL2/DPYD/U6/F3/ABCA4/GCLM/BCAR3/3/U1/U1/HJV/TXNIP/ANKRD34A/RBM8A/ODF2L/ADGRL4/PIGK/ANKRD13C/SERBP1/ITGB3BP/DAB1/3/3/ECHDC2/TUT4
	27753249	87017624	3	ENSBTAG00000031575/ENSBTAG00000049591/ENSBTAG00000021217/ENSBTAG00000019026/ENSBTAG00000031358/ENSBTAG00000044378/ENSBTAG00000007101/ENSBTAG00000018010/ENSBTAG00000007842/ENSBTAG00000003245/ENSBTAG00000050182/ENSBTAG00000012907/ENSBTAG00000019733/ENSBTAG00000031012/ENSBTAG00000015482/ENSBTAG00000012957/ENSBTAG00000030710	VAV3/3/COL11A1/EXTL2/DPYD/U6/F3/ABCA4/GCLM/BCAR3/3/ODF2L/ADGRL4/PIGK/ANKRD13C/SERBP1/ITGB3BP
	30385970	39739590	3	ENSBTAG00000031575/ENSBTAG00000049591	VAV3/3
	31397709	51069220	3	ENSBTAG00000031575/ENSBTAG00000049591/ENSBTAG00000021217/ENSBTAG00000019026/ENSBTAG00000031358/ENSBTAG00000044378/ENSBTAG00000007101/ENSBTAG00000018010/ENSBTAG00000007842/ENSBTAG00000003245	VAV3/3/COL11A1/EXTL2/DPYD/U6/F3/ABCA4/GCLM/BCAR3
	34760915	67424039	3	ENSBTAG00000031575/ENSBTAG00000049591/ENSBTAG00000021217/ENSBTAG00000019026/ENSBTAG00000031358/ENSBTAG00000044378/ENSBTAG00000007101/ENSBTAG00000018010/ENSBTAG00000007842/ENSBTAG00000003245/ENSBTAG00000050182/ENSBTAG00000012907/ENSBTAG00000019733	VAV3/3/COL11A1/EXTL2/DPYD/U6/F3/ABCA4/GCLM/BCAR3/3/ODF2L/ADGRL4
	35255950	89675602	3	ENSBTAG00000031575/ENSBTAG00000049591/ENSBTAG00000021217/ENSBTAG00000019026/ENSBTAG00000031358/ENSBTAG00000044378/ENSBTAG00000007101/ENSBTAG00000018010/ENSBTAG00000007842/ENSBTAG00000003245/ENSBTAG00000050182/ENSBTAG00000012907/ENSBTAG00000019733/ENSBTAG00000031012/ENSBTAG00000015482/ENSBTAG00000012957/ENSBTAG00000030710/ENSBTAG00000013802	VAV3/3/COL11A1/EXTL2/DPYD/U6/F3/ABCA4/GCLM/BCAR3/3/ODF2L/ADGRL4/PIGK/ANKRD13C/SERBP1/ITGB3BP/DAB1
	35441056	74675978	3	ENSBTAG00000031575/ENSBTAG00000049591/ENSBTAG00000021217/ENSBTAG00000019026/ENSBTAG00000031358/ENSBTAG00000044378/ENSBTAG00000007101/ENSBTAG00000018010/ENSBTAG00000007842/ENSBTAG00000003245/ENSBTAG00000050182/ENSBTAG00000012907/ENSBTAG00000019733/ENSBTAG00000031012	VAV3/3/COL11A1/EXTL2/DPYD/U6/F3/ABCA4/GCLM/BCAR3/3/ODF2L/ADGRL4/PIGK
	35441056	103448870	3	ENSBTAG00000017844/ENSBTAG00000043793/ENSBTAG00000052144/ENSBTAG00000005029/ENSBTAG00000002555/ENSBTAG00000002979/ENSBTAG00000012648/ENSBTAG00000031575/ENSBTAG00000049591/ENSBTAG00000021217/ENSBTAG00000019026/ENSBTAG00000031358/ENSBTAG00000044378/ENSBTAG00000007101/ENSBTAG00000018010/ENSBTAG00000007842/ENSBTAG00000003245/ENSBTAG00000050182/ENSBTAG00000012907/ENSBTAG00000019733/ENSBTAG00000031012/…	STIL/5S_rRNA/U6/TAL1/PDZK1IP1/PIK3R3/ZSWIM5/VAV3/3/COL11A1/EXTL2/DPYD/U6/F3/ABCA4/GCLM/BCAR3/3/ODF2L/ADGRL4/PIGK/ANKRD13C/SERBP1/ITGB3BP/DAB1/3/3/ECHDC2/TUT4
	36152918	76685944	3	ENSBTAG00000021217/ENSBTAG00000019026/ENSBTAG00000031358/ENSBTAG00000044378/ENSBTAG00000007101/ENSBTAG00000018010/ENSBTAG00000007842/ENSBTAG00000003245/ENSBTAG00000050182/ENSBTAG00000012907/ENSBTAG00000019733/ENSBTAG00000031012/ENSBTAG00000015482	COL11A1/EXTL2/DPYD/U6/F3/ABCA4/GCLM/BCAR3/3/ODF2L/ADGRL4/PIGK/ANKRD13C
	36196363	40625026	3	ENSBTAG00000021217	COL11A1
	36196363	89039841	3	ENSBTAG00000021217/ENSBTAG00000019026/ENSBTAG00000031358/ENSBTAG00000044378/ENSBTAG00000007101/ENSBTAG00000018010/ENSBTAG00000007842/ENSBTAG00000003245/ENSBTAG00000050182/ENSBTAG00000012907/ENSBTAG00000019733/ENSBTAG00000031012/ENSBTAG00000015482/ENSBTAG00000012957/ENSBTAG00000030710/ENSBTAG00000013802	COL11A1/EXTL2/DPYD/U6/F3/ABCA4/GCLM/BCAR3/3/ODF2L/ADGRL4/PIGK/ANKRD13C/SERBP1/ITGB3BP/DAB1
	36196363	121403393	3	ENSBTAG00000017844/ENSBTAG00000043793/ENSBTAG00000052144/ENSBTAG00000005029/ENSBTAG00000002555/ENSBTAG00000002979/ENSBTAG00000012648/ENSBTAG00000021217/ENSBTAG00000019026/ENSBTAG00000001629/ENSBTAG00000001628/ENSBTAG00000030672/ENSBTAG00000031358/ENSBTAG00000044378/ENSBTAG00000007101/ENSBTAG00000018010/ENSBTAG00000009269/ENSBTAG00000007842/ENSBTAG00000003245/ENSBTAG00000016694/ENSBTAG00000050182/…	STIL/5S_rRNA/U6/TAL1/PDZK1IP1/PIK3R3/ZSWIM5/COL11A1/EXTL2/SCMH1/SLFNL1/3/DPYD/U6/F3/ABCA4/GRIK3/GCLM/BCAR3/KIAA0319L/3/EFHD1/GIGYF2/ODF2L/3/ADGRL4/PIGK/ANKRD13C/SERBP1/ITGB3BP/DAB1/3/3/ECHDC2/TUT4
	37101347	67376336	3	ENSBTAG00000021217/ENSBTAG00000019026/ENSBTAG00000031358/ENSBTAG00000044378/ENSBTAG00000007101/ENSBTAG00000018010/ENSBTAG00000007842/ENSBTAG00000003245/ENSBTAG00000050182/ENSBTAG00000012907/ENSBTAG00000019733	COL11A1/EXTL2/DPYD/U6/F3/ABCA4/GCLM/BCAR3/3/ODF2L/ADGRL4
	39574744	46747787	3	ENSBTAG00000021217/ENSBTAG00000019026/ENSBTAG00000031358	COL11A1/EXTL2/DPYD
	40556734	67303946	3	ENSBTAG00000019026/ENSBTAG00000031358/ENSBTAG00000044378/ENSBTAG00000007101/ENSBTAG00000018010/ENSBTAG00000007842/ENSBTAG00000003245/ENSBTAG00000050182/ENSBTAG00000012907/ENSBTAG00000019733	EXTL2/DPYD/U6/F3/ABCA4/GCLM/BCAR3/3/ODF2L/ADGRL4
	40936344	102795097	3	ENSBTAG00000017844/ENSBTAG00000043793/ENSBTAG00000052144/ENSBTAG00000005029/ENSBTAG00000002555/ENSBTAG00000002979/ENSBTAG00000012648/ENSBTAG00000019026/ENSBTAG00000031358/ENSBTAG00000044378/ENSBTAG00000007101/ENSBTAG00000018010/ENSBTAG00000007842/ENSBTAG00000003245/ENSBTAG00000050182/ENSBTAG00000012907/ENSBTAG00000019733/ENSBTAG00000031012/ENSBTAG00000015482/ENSBTAG00000012957/ENSBTAG00000030710/…	STIL/5S_rRNA/U6/TAL1/PDZK1IP1/PIK3R3/ZSWIM5/EXTL2/DPYD/U6/F3/ABCA4/GCLM/BCAR3/3/ODF2L/ADGRL4/PIGK/ANKRD13C/SERBP1/ITGB3BP/DAB1/3/3/ECHDC2/TUT4
	41589167	42893462	3	ENSBTAG00000019026	EXTL2
	41781542	112224915	3	ENSBTAG00000017844/ENSBTAG00000043793/ENSBTAG00000052144/ENSBTAG00000005029/ENSBTAG00000002555/ENSBTAG00000002979/ENSBTAG00000012648/ENSBTAG00000019026/ENSBTAG00000001629/ENSBTAG00000001628/ENSBTAG00000030672/ENSBTAG00000031358/ENSBTAG00000044378/ENSBTAG00000007101/ENSBTAG00000018010/ENSBTAG00000009269/ENSBTAG00000007842/ENSBTAG00000003245/ENSBTAG00000016694/ENSBTAG00000050182/ENSBTAG00000012907/…	STIL/5S_rRNA/U6/TAL1/PDZK1IP1/PIK3R3/ZSWIM5/EXTL2/SCMH1/SLFNL1/3/DPYD/U6/F3/ABCA4/GRIK3/GCLM/BCAR3/KIAA0319L/3/ODF2L/ADGRL4/PIGK/ANKRD13C/SERBP1/ITGB3BP/DAB1/3/3/ECHDC2/TUT4
	43531010	58990334	3	ENSBTAG00000031358/ENSBTAG00000044378/ENSBTAG00000007101/ENSBTAG00000018010/ENSBTAG00000007842/ENSBTAG00000003245/ENSBTAG00000050182/ENSBTAG00000012907	DPYD/U6/F3/ABCA4/GCLM/BCAR3/3/ODF2L
	45405468	53148348	3	ENSBTAG00000031358/ENSBTAG00000044378/ENSBTAG00000007101/ENSBTAG00000018010/ENSBTAG00000007842/ENSBTAG00000003245	DPYD/U6/F3/ABCA4/GCLM/BCAR3
	45996935	48313245	3	ENSBTAG00000031358	DPYD
	46183444	56400164	3	ENSBTAG00000031358/ENSBTAG00000044378/ENSBTAG00000007101/ENSBTAG00000018010/ENSBTAG00000007842/ENSBTAG00000003245/ENSBTAG00000050182	DPYD/U6/F3/ABCA4/GCLM/BCAR3/3
	47571104	63963061	3	ENSBTAG00000044378/ENSBTAG00000007101/ENSBTAG00000018010/ENSBTAG00000007842/ENSBTAG00000003245/ENSBTAG00000050182/ENSBTAG00000012907	U6/F3/ABCA4/GCLM/BCAR3/3/ODF2L
	47947600	50509843	3	ENSBTAG00000044378/ENSBTAG00000007101/ENSBTAG00000018010/ENSBTAG00000007842/ENSBTAG00000003245	U6/F3/ABCA4/GCLM/BCAR3
	48164097	66444944	3	ENSBTAG00000044378/ENSBTAG00000007101/ENSBTAG00000018010/ENSBTAG00000007842/ENSBTAG00000003245/ENSBTAG00000050182/ENSBTAG00000012907/ENSBTAG00000019733	U6/F3/ABCA4/GCLM/BCAR3/3/ODF2L/ADGRL4
	48304916	49200769	3	ENSBTAG00000044378/ENSBTAG00000007101	U6/F3
	48935268	79282515	3	ENSBTAG00000044378/ENSBTAG00000007101/ENSBTAG00000018010/ENSBTAG00000007842/ENSBTAG00000003245/ENSBTAG00000050182/ENSBTAG00000012907/ENSBTAG00000019733/ENSBTAG00000031012/ENSBTAG00000015482/ENSBTAG00000012957	U6/F3/ABCA4/GCLM/BCAR3/3/ODF2L/ADGRL4/PIGK/ANKRD13C/SERBP1
	48935268	112224915	3	ENSBTAG00000017844/ENSBTAG00000043793/ENSBTAG00000052144/ENSBTAG00000005029/ENSBTAG00000002555/ENSBTAG00000002979/ENSBTAG00000012648/ENSBTAG00000001629/ENSBTAG00000001628/ENSBTAG00000030672/ENSBTAG00000044378/ENSBTAG00000007101/ENSBTAG00000018010/ENSBTAG00000009269/ENSBTAG00000007842/ENSBTAG00000003245/ENSBTAG00000016694/ENSBTAG00000050182/ENSBTAG00000012907/ENSBTAG00000019733/ENSBTAG00000031012/…	STIL/5S_rRNA/U6/TAL1/PDZK1IP1/PIK3R3/ZSWIM5/SCMH1/SLFNL1/3/U6/F3/ABCA4/GRIK3/GCLM/BCAR3/KIAA0319L/3/ODF2L/ADGRL4/PIGK/ANKRD13C/SERBP1/ITGB3BP/DAB1/3/3/ECHDC2/TUT4
	52987455	80517326	3	ENSBTAG00000050182/ENSBTAG00000012907/ENSBTAG00000019733/ENSBTAG00000031012/ENSBTAG00000015482/ENSBTAG00000012957	3/ODF2L/ADGRL4/PIGK/ANKRD13C/SERBP1
	53343172	111382263	3	ENSBTAG00000017844/ENSBTAG00000043793/ENSBTAG00000052144/ENSBTAG00000005029/ENSBTAG00000002555/ENSBTAG00000002979/ENSBTAG00000012648/ENSBTAG00000001629/ENSBTAG00000001628/ENSBTAG00000030672/ENSBTAG00000009269/ENSBTAG00000016694/ENSBTAG00000050182/ENSBTAG00000012907/ENSBTAG00000019733/ENSBTAG00000031012/ENSBTAG00000015482/ENSBTAG00000012957/ENSBTAG00000030710/ENSBTAG00000013802/ENSBTAG00000052231/…	STIL/5S_rRNA/U6/TAL1/PDZK1IP1/PIK3R3/ZSWIM5/SCMH1/SLFNL1/3/GRIK3/KIAA0319L/3/ODF2L/ADGRL4/PIGK/ANKRD13C/SERBP1/ITGB3BP/DAB1/3/3/ECHDC2/TUT4
	56117238	66244559	3	ENSBTAG00000012907/ENSBTAG00000019733	ODF2L/ADGRL4
	56205436	58662857	3	ENSBTAG00000012907	ODF2L
	60929295	78777587	3	ENSBTAG00000019733/ENSBTAG00000031012/ENSBTAG00000015482/ENSBTAG00000012957	ADGRL4/PIGK/ANKRD13C/SERBP1
	61213804	75047802	3	ENSBTAG00000019733/ENSBTAG00000031012/ENSBTAG00000015482	ADGRL4/PIGK/ANKRD13C
	63617142	66067599	3	ENSBTAG00000019733	ADGRL4
	65190739	67632435	3	ENSBTAG00000019733/ENSBTAG00000031012	ADGRL4/PIGK
	65336197	82279986	3	ENSBTAG00000019733/ENSBTAG00000031012/ENSBTAG00000015482/ENSBTAG00000012957/ENSBTAG00000030710	ADGRL4/PIGK/ANKRD13C/SERBP1/ITGB3BP
	66198115	68432145	3	ENSBTAG00000031012	PIGK
	66198115	80006403	3	ENSBTAG00000031012/ENSBTAG00000015482/ENSBTAG00000012957	PIGK/ANKRD13C/SERBP1
	66554349	89003233	3	ENSBTAG00000031012/ENSBTAG00000015482/ENSBTAG00000012957/ENSBTAG00000030710/ENSBTAG00000013802	PIGK/ANKRD13C/SERBP1/ITGB3BP/DAB1
	67444200	85377870	3	ENSBTAG00000031012/ENSBTAG00000015482/ENSBTAG00000012957/ENSBTAG00000030710	PIGK/ANKRD13C/SERBP1/ITGB3BP
	67474440	102795097	3	ENSBTAG00000017844/ENSBTAG00000043793/ENSBTAG00000052144/ENSBTAG00000005029/ENSBTAG00000002555/ENSBTAG00000002979/ENSBTAG00000012648/ENSBTAG00000031012/ENSBTAG00000015482/ENSBTAG00000012957/ENSBTAG00000030710/ENSBTAG00000013802/ENSBTAG00000052231/ENSBTAG00000052303/ENSBTAG00000002910/ENSBTAG00000002721	STIL/5S_rRNA/U6/TAL1/PDZK1IP1/PIK3R3/ZSWIM5/PIGK/ANKRD13C/SERBP1/ITGB3BP/DAB1/3/3/ECHDC2/TUT4
	67474440	111382263	3	ENSBTAG00000017844/ENSBTAG00000043793/ENSBTAG00000052144/ENSBTAG00000005029/ENSBTAG00000002555/ENSBTAG00000002979/ENSBTAG00000012648/ENSBTAG00000001629/ENSBTAG00000001628/ENSBTAG00000030672/ENSBTAG00000009269/ENSBTAG00000016694/ENSBTAG00000031012/ENSBTAG00000015482/ENSBTAG00000012957/ENSBTAG00000030710/ENSBTAG00000013802/ENSBTAG00000052231/ENSBTAG00000052303/ENSBTAG00000002910/ENSBTAG00000002721	STIL/5S_rRNA/U6/TAL1/PDZK1IP1/PIK3R3/ZSWIM5/SCMH1/SLFNL1/3/GRIK3/KIAA0319L/PIGK/ANKRD13C/SERBP1/ITGB3BP/DAB1/3/3/ECHDC2/TUT4
	68575626	86017690	3	ENSBTAG00000015482/ENSBTAG00000012957/ENSBTAG00000030710	ANKRD13C/SERBP1/ITGB3BP
	69292666	121403393	3	ENSBTAG00000017844/ENSBTAG00000043793/ENSBTAG00000052144/ENSBTAG00000005029/ENSBTAG00000002555/ENSBTAG00000002979/ENSBTAG00000012648/ENSBTAG00000001629/ENSBTAG00000001628/ENSBTAG00000030672/ENSBTAG00000009269/ENSBTAG00000016694/ENSBTAG00000014596/ENSBTAG00000014079/ENSBTAG00000054834/ENSBTAG00000015482/ENSBTAG00000012957/ENSBTAG00000030710/ENSBTAG00000013802/ENSBTAG00000052231/ENSBTAG00000052303/…	STIL/5S_rRNA/U6/TAL1/PDZK1IP1/PIK3R3/ZSWIM5/SCMH1/SLFNL1/3/GRIK3/KIAA0319L/EFHD1/GIGYF2/3/ANKRD13C/SERBP1/ITGB3BP/DAB1/3/3/ECHDC2/TUT4
	74204900	78728684	3	ENSBTAG00000015482/ENSBTAG00000012957	ANKRD13C/SERBP1
	74856087	93460623	3	ENSBTAG00000015482/ENSBTAG00000012957/ENSBTAG00000030710/ENSBTAG00000013802/ENSBTAG00000052231/ENSBTAG00000052303/ENSBTAG00000002910	ANKRD13C/SERBP1/ITGB3BP/DAB1/3/3/ECHDC2
	74856087	103448870	3	ENSBTAG00000017844/ENSBTAG00000043793/ENSBTAG00000052144/ENSBTAG00000005029/ENSBTAG00000002555/ENSBTAG00000002979/ENSBTAG00000012648/ENSBTAG00000015482/ENSBTAG00000012957/ENSBTAG00000030710/ENSBTAG00000013802/ENSBTAG00000052231/ENSBTAG00000052303/ENSBTAG00000002910/ENSBTAG00000002721	STIL/5S_rRNA/U6/TAL1/PDZK1IP1/PIK3R3/ZSWIM5/ANKRD13C/SERBP1/ITGB3BP/DAB1/3/3/ECHDC2/TUT4
	75737505	78201865	3	ENSBTAG00000012957	SERBP1
	76406790	83644705	3	ENSBTAG00000012957/ENSBTAG00000030710	SERBP1/ITGB3BP
	77426665	111590547	3	ENSBTAG00000017844/ENSBTAG00000043793/ENSBTAG00000052144/ENSBTAG00000005029/ENSBTAG00000002555/ENSBTAG00000002979/ENSBTAG00000012648/ENSBTAG00000001629/ENSBTAG00000001628/ENSBTAG00000030672/ENSBTAG00000009269/ENSBTAG00000016694/ENSBTAG00000012957/ENSBTAG00000030710/ENSBTAG00000013802/ENSBTAG00000052231/ENSBTAG00000052303/ENSBTAG00000002910/ENSBTAG00000002721	STIL/5S_rRNA/U6/TAL1/PDZK1IP1/PIK3R3/ZSWIM5/SCMH1/SLFNL1/3/GRIK3/KIAA0319L/SERBP1/ITGB3BP/DAB1/3/3/ECHDC2/TUT4
	77923168	99111024	3	ENSBTAG00000017844/ENSBTAG00000043793/ENSBTAG00000052144/ENSBTAG00000005029/ENSBTAG00000002555/ENSBTAG00000012957/ENSBTAG00000030710/ENSBTAG00000013802/ENSBTAG00000052231/ENSBTAG00000052303/ENSBTAG00000002910/ENSBTAG00000002721	STIL/5S_rRNA/U6/TAL1/PDZK1IP1/SERBP1/ITGB3BP/DAB1/3/3/ECHDC2/TUT4
	78443934	89327246	3	ENSBTAG00000030710/ENSBTAG00000013802	ITGB3BP/DAB1
	80672338	94619477	3	ENSBTAG00000030710/ENSBTAG00000013802/ENSBTAG00000052231/ENSBTAG00000052303/ENSBTAG00000002910/ENSBTAG00000002721	ITGB3BP/DAB1/3/3/ECHDC2/TUT4
	80672338	109565152	3	ENSBTAG00000017844/ENSBTAG00000043793/ENSBTAG00000052144/ENSBTAG00000005029/ENSBTAG00000002555/ENSBTAG00000002979/ENSBTAG00000012648/ENSBTAG00000001629/ENSBTAG00000001628/ENSBTAG00000030672/ENSBTAG00000009269/ENSBTAG00000030710/ENSBTAG00000013802/ENSBTAG00000052231/ENSBTAG00000052303/ENSBTAG00000002910/ENSBTAG00000002721	STIL/5S_rRNA/U6/TAL1/PDZK1IP1/PIK3R3/ZSWIM5/SCMH1/SLFNL1/3/GRIK3/ITGB3BP/DAB1/3/3/ECHDC2/TUT4
	80672338	112110374	3	ENSBTAG00000017844/ENSBTAG00000043793/ENSBTAG00000052144/ENSBTAG00000005029/ENSBTAG00000002555/ENSBTAG00000002979/ENSBTAG00000012648/ENSBTAG00000001629/ENSBTAG00000001628/ENSBTAG00000030672/ENSBTAG00000009269/ENSBTAG00000016694/ENSBTAG00000030710/ENSBTAG00000013802/ENSBTAG00000052231/ENSBTAG00000052303/ENSBTAG00000002910/ENSBTAG00000002721	STIL/5S_rRNA/U6/TAL1/PDZK1IP1/PIK3R3/ZSWIM5/SCMH1/SLFNL1/3/GRIK3/KIAA0319L/ITGB3BP/DAB1/3/3/ECHDC2/TUT4
	81575667	84395415	3	ENSBTAG00000030710	ITGB3BP
	82623974	121403393	3	ENSBTAG00000017844/ENSBTAG00000043793/ENSBTAG00000052144/ENSBTAG00000005029/ENSBTAG00000002555/ENSBTAG00000002979/ENSBTAG00000012648/ENSBTAG00000001629/ENSBTAG00000001628/ENSBTAG00000030672/ENSBTAG00000009269/ENSBTAG00000016694/ENSBTAG00000014596/ENSBTAG00000014079/ENSBTAG00000054834/ENSBTAG00000013802/ENSBTAG00000052231/ENSBTAG00000052303/ENSBTAG00000002910/ENSBTAG00000002721	STIL/5S_rRNA/U6/TAL1/PDZK1IP1/PIK3R3/ZSWIM5/SCMH1/SLFNL1/3/GRIK3/KIAA0319L/EFHD1/GIGYF2/3/DAB1/3/3/ECHDC2/TUT4
	84542984	96834559	3	ENSBTAG00000013802/ENSBTAG00000052231/ENSBTAG00000052303/ENSBTAG00000002910/ENSBTAG00000002721	DAB1/3/3/ECHDC2/TUT4
	85984517	102651971	3	ENSBTAG00000017844/ENSBTAG00000043793/ENSBTAG00000052144/ENSBTAG00000005029/ENSBTAG00000002555/ENSBTAG00000002979/ENSBTAG00000012648/ENSBTAG00000013802/ENSBTAG00000052231/ENSBTAG00000052303/ENSBTAG00000002910/ENSBTAG00000002721	STIL/5S_rRNA/U6/TAL1/PDZK1IP1/PIK3R3/ZSWIM5/DAB1/3/3/ECHDC2/TUT4
	86051675	100126720	3	ENSBTAG00000017844/ENSBTAG00000043793/ENSBTAG00000052144/ENSBTAG00000005029/ENSBTAG00000002555/ENSBTAG00000002979/ENSBTAG00000013802/ENSBTAG00000052231/ENSBTAG00000052303/ENSBTAG00000002910/ENSBTAG00000002721	STIL/5S_rRNA/U6/TAL1/PDZK1IP1/PIK3R3/DAB1/3/3/ECHDC2/TUT4
	87451543	112495974	3	ENSBTAG00000017844/ENSBTAG00000043793/ENSBTAG00000052144/ENSBTAG00000005029/ENSBTAG00000002555/ENSBTAG00000002979/ENSBTAG00000012648/ENSBTAG00000001629/ENSBTAG00000001628/ENSBTAG00000030672/ENSBTAG00000009269/ENSBTAG00000016694/ENSBTAG00000014596/ENSBTAG00000014079/ENSBTAG00000013802/ENSBTAG00000052231/ENSBTAG00000052303/ENSBTAG00000002910/ENSBTAG00000002721	STIL/5S_rRNA/U6/TAL1/PDZK1IP1/PIK3R3/ZSWIM5/SCMH1/SLFNL1/3/GRIK3/KIAA0319L/EFHD1/GIGYF2/DAB1/3/3/ECHDC2/TUT4
	88033447	107830416	3	ENSBTAG00000017844/ENSBTAG00000043793/ENSBTAG00000052144/ENSBTAG00000005029/ENSBTAG00000002555/ENSBTAG00000002979/ENSBTAG00000012648/ENSBTAG00000001629/ENSBTAG00000001628/ENSBTAG00000030672/ENSBTAG00000013802/ENSBTAG00000052231/ENSBTAG00000052303/ENSBTAG00000002910/ENSBTAG00000002721	STIL/5S_rRNA/U6/TAL1/PDZK1IP1/PIK3R3/ZSWIM5/SCMH1/SLFNL1/3/DAB1/3/3/ECHDC2/TUT4
	88054073	90258405	3	ENSBTAG00000013802	DAB1
	89213164	111590547	3	ENSBTAG00000017844/ENSBTAG00000043793/ENSBTAG00000052144/ENSBTAG00000005029/ENSBTAG00000002555/ENSBTAG00000002979/ENSBTAG00000012648/ENSBTAG00000001629/ENSBTAG00000001628/ENSBTAG00000030672/ENSBTAG00000009269/ENSBTAG00000016694/ENSBTAG00000052231/ENSBTAG00000052303/ENSBTAG00000002910/ENSBTAG00000002721	STIL/5S_rRNA/U6/TAL1/PDZK1IP1/PIK3R3/ZSWIM5/SCMH1/SLFNL1/3/GRIK3/KIAA0319L/3/3/ECHDC2/TUT4
	90202355	99111024	3	ENSBTAG00000017844/ENSBTAG00000043793/ENSBTAG00000052144/ENSBTAG00000005029/ENSBTAG00000002555/ENSBTAG00000052231/ENSBTAG00000052303/ENSBTAG00000002910/ENSBTAG00000002721	STIL/5S_rRNA/U6/TAL1/PDZK1IP1/3/3/ECHDC2/TUT4
	91583640	93703308	3	ENSBTAG00000052231/ENSBTAG00000052303/ENSBTAG00000002910	3/3/ECHDC2
	91734831	121403393	3	ENSBTAG00000017844/ENSBTAG00000043793/ENSBTAG00000052144/ENSBTAG00000005029/ENSBTAG00000002555/ENSBTAG00000002979/ENSBTAG00000012648/ENSBTAG00000001629/ENSBTAG00000001628/ENSBTAG00000030672/ENSBTAG00000009269/ENSBTAG00000016694/ENSBTAG00000014596/ENSBTAG00000014079/ENSBTAG00000054834/ENSBTAG00000052231/ENSBTAG00000052303/ENSBTAG00000002910/ENSBTAG00000002721	STIL/5S_rRNA/U6/TAL1/PDZK1IP1/PIK3R3/ZSWIM5/SCMH1/SLFNL1/3/GRIK3/KIAA0319L/EFHD1/GIGYF2/3/3/3/ECHDC2/TUT4
	92623849	103169062	3	ENSBTAG00000017844/ENSBTAG00000043793/ENSBTAG00000052144/ENSBTAG00000005029/ENSBTAG00000002555/ENSBTAG00000002979/ENSBTAG00000012648/ENSBTAG00000052231/ENSBTAG00000052303/ENSBTAG00000002910/ENSBTAG00000002721	STIL/5S_rRNA/U6/TAL1/PDZK1IP1/PIK3R3/ZSWIM5/3/3/ECHDC2/TUT4
	93116911	96702795	3	ENSBTAG00000052231/ENSBTAG00000052303/ENSBTAG00000002910/ENSBTAG00000002721	3/3/ECHDC2/TUT4
	93450015	111677789	3	ENSBTAG00000017844/ENSBTAG00000043793/ENSBTAG00000052144/ENSBTAG00000005029/ENSBTAG00000002555/ENSBTAG00000002979/ENSBTAG00000012648/ENSBTAG00000001629/ENSBTAG00000001628/ENSBTAG00000030672/ENSBTAG00000009269/ENSBTAG00000016694/ENSBTAG00000002910/ENSBTAG00000002721	STIL/5S_rRNA/U6/TAL1/PDZK1IP1/PIK3R3/ZSWIM5/SCMH1/SLFNL1/3/GRIK3/KIAA0319L/ECHDC2/TUT4
	93589244	111590547	3	ENSBTAG00000017844/ENSBTAG00000043793/ENSBTAG00000052144/ENSBTAG00000005029/ENSBTAG00000002555/ENSBTAG00000002979/ENSBTAG00000012648/ENSBTAG00000001629/ENSBTAG00000001628/ENSBTAG00000030672/ENSBTAG00000009269/ENSBTAG00000016694/ENSBTAG00000002721	STIL/5S_rRNA/U6/TAL1/PDZK1IP1/PIK3R3/ZSWIM5/SCMH1/SLFNL1/3/GRIK3/KIAA0319L/TUT4
	93703308	96834559	3	ENSBTAG00000002721	TUT4
	95279013	115440329	3	ENSBTAG00000017844/ENSBTAG00000043793/ENSBTAG00000052144/ENSBTAG00000005029/ENSBTAG00000002555/ENSBTAG00000002979/ENSBTAG00000012648/ENSBTAG00000001629/ENSBTAG00000001628/ENSBTAG00000030672/ENSBTAG00000009269/ENSBTAG00000016694/ENSBTAG00000014596/ENSBTAG00000014079	STIL/5S_rRNA/U6/TAL1/PDZK1IP1/PIK3R3/ZSWIM5/SCMH1/SLFNL1/3/GRIK3/KIAA0319L/EFHD1/GIGYF2
	96931770	98978974	3	ENSBTAG00000017844/ENSBTAG00000043793/ENSBTAG00000052144	STIL/5S_rRNA/U6
	97583318	99919665	3	ENSBTAG00000017844/ENSBTAG00000043793/ENSBTAG00000052144/ENSBTAG00000005029/ENSBTAG00000002555	STIL/5S_rRNA/U6/TAL1/PDZK1IP1
	97975773	100248366	3	ENSBTAG00000017844/ENSBTAG00000043793/ENSBTAG00000052144/ENSBTAG00000005029/ENSBTAG00000002555/ENSBTAG00000002979	STIL/5S_rRNA/U6/TAL1/PDZK1IP1/PIK3R3
	98587436	109282190	3	ENSBTAG00000017844/ENSBTAG00000043793/ENSBTAG00000052144/ENSBTAG00000005029/ENSBTAG00000002555/ENSBTAG00000002979/ENSBTAG00000012648/ENSBTAG00000001629/ENSBTAG00000001628/ENSBTAG00000030672/ENSBTAG00000009269	STIL/5S_rRNA/U6/TAL1/PDZK1IP1/PIK3R3/ZSWIM5/SCMH1/SLFNL1/3/GRIK3
	99242465	108283132	3	ENSBTAG00000002979/ENSBTAG00000012648/ENSBTAG00000001629/ENSBTAG00000001628/ENSBTAG00000030672	PIK3R3/ZSWIM5/SCMH1/SLFNL1/3
	99525326	101785952	3	ENSBTAG00000002979/ENSBTAG00000012648	PIK3R3/ZSWIM5
	100563383	105114210	3	ENSBTAG00000012648/ENSBTAG00000001629	ZSWIM5/SCMH1
	100584312	121403393	3	ENSBTAG00000012648/ENSBTAG00000001629/ENSBTAG00000001628/ENSBTAG00000030672/ENSBTAG00000009269/ENSBTAG00000016694/ENSBTAG00000014596/ENSBTAG00000014079/ENSBTAG00000054834	ZSWIM5/SCMH1/SLFNL1/3/GRIK3/KIAA0319L/EFHD1/GIGYF2/3
	100708781	103043290	3	ENSBTAG00000012648	ZSWIM5
	100810596	111590547	3	ENSBTAG00000012648/ENSBTAG00000001629/ENSBTAG00000001628/ENSBTAG00000030672/ENSBTAG00000009269/ENSBTAG00000016694	ZSWIM5/SCMH1/SLFNL1/3/GRIK3/KIAA0319L
	102162018	109036828	3	ENSBTAG00000001629/ENSBTAG00000001628/ENSBTAG00000030672/ENSBTAG00000009269	SCMH1/SLFNL1/3/GRIK3
	102673503	121403393	3	ENSBTAG00000001629/ENSBTAG00000001628/ENSBTAG00000030672/ENSBTAG00000009269/ENSBTAG00000016694/ENSBTAG00000014596/ENSBTAG00000014079/ENSBTAG00000054834	SCMH1/SLFNL1/3/GRIK3/KIAA0319L/EFHD1/GIGYF2/3
	102931280	111677789	3	ENSBTAG00000001629/ENSBTAG00000001628/ENSBTAG00000030672/ENSBTAG00000009269/ENSBTAG00000016694	SCMH1/SLFNL1/3/GRIK3/KIAA0319L
	103043290	115297151	3	ENSBTAG00000001629/ENSBTAG00000001628/ENSBTAG00000030672/ENSBTAG00000009269/ENSBTAG00000016694/ENSBTAG00000014596/ENSBTAG00000014079	SCMH1/SLFNL1/3/GRIK3/KIAA0319L/EFHD1/GIGYF2
	103190088	105442628	3	ENSBTAG00000001629/ENSBTAG00000001628/ENSBTAG00000030672	SCMH1/SLFNL1/3
	107006890	109036828	3	ENSBTAG00000009269	GRIK3
	107386284	117652189	3	ENSBTAG00000009269/ENSBTAG00000016694/ENSBTAG00000014596/ENSBTAG00000014079	GRIK3/KIAA0319L/EFHD1/GIGYF2
	108401517	110793254	3	ENSBTAG00000009269/ENSBTAG00000016694	GRIK3/KIAA0319L
	109757416	111816968	3	ENSBTAG00000016694	KIAA0319L
	112024623	114149464	3	ENSBTAG00000014596/ENSBTAG00000014079	EFHD1/GIGYF2
	112416215	121403393	3	ENSBTAG00000014596/ENSBTAG00000014079/ENSBTAG00000054834	EFHD1/GIGYF2/3
	112542497	114672300	3	ENSBTAG00000014079	GIGYF2
	112542497	121403393	3	ENSBTAG00000014079/ENSBTAG00000054834	GIGYF2/3
	117960375	121403393	3	ENSBTAG00000054834
	17112	9934426	4	ENSBTAG00000023806/ENSBTAG00000018363	COBL/RBM48
	17112	18055492	4	ENSBTAG00000047004/ENSBTAG00000023806/ENSBTAG00000018363/ENSBTAG00000053735/ENSBTAG00000043945	UMAD1/COBL/RBM48/PEG10/U6
	17112	42137347	4	ENSBTAG00000047004/ENSBTAG00000023806/ENSBTAG00000018363/ENSBTAG00000053735/ENSBTAG00000043945/ENSBTAG00000024394	UMAD1/COBL/RBM48/PEG10/U6/SEMA3D
	2579337	72960813	4	ENSBTAG00000047004/ENSBTAG00000023806/ENSBTAG00000018363/ENSBTAG00000053735/ENSBTAG00000043945/ENSBTAG00000024394/ENSBTAG00000000189/ENSBTAG00000009207/ENSBTAG00000004398/ENSBTAG00000053964/ENSBTAG00000003490/ENSBTAG00000017541/ENSBTAG00000032650/ENSBTAG00000007870/ENSBTAG00000016223	UMAD1/COBL/RBM48/PEG10/U6/SEMA3D/LHFPL3/KMT2E/IMMP2L/4/ELMO1/TBX20/DPY19L2/FKBP14/SCRN1
	2702626	96770424	4	ENSBTAG00000047004/ENSBTAG00000023806/ENSBTAG00000018363/ENSBTAG00000053735/ENSBTAG00000043945/ENSBTAG00000024394/ENSBTAG00000000189/ENSBTAG00000009207/ENSBTAG00000004398/ENSBTAG00000053964/ENSBTAG00000003490/ENSBTAG00000017541/ENSBTAG00000032650/ENSBTAG00000007870/ENSBTAG00000016223/ENSBTAG00000046334/ENSBTAG00000010504/ENSBTAG00000043398/ENSBTAG00000043541/ENSBTAG00000051248/ENSBTAG00000031967/…	UMAD1/COBL/RBM48/PEG10/U6/SEMA3D/LHFPL3/KMT2E/IMMP2L/4/ELMO1/TBX20/DPY19L2/FKBP14/SCRN1/4/TBRG4/SNORA5C/SNORA5A/4/AMPH/4
	3914939	14379418	4	ENSBTAG00000023806/ENSBTAG00000018363/ENSBTAG00000053735/ENSBTAG00000043945	COBL/RBM48/PEG10/U6
	4728423	7252935	4	ENSBTAG00000023806	COBL
	6019719	22553471	4	ENSBTAG00000047004/ENSBTAG00000018363/ENSBTAG00000053735/ENSBTAG00000043945	UMAD1/RBM48/PEG10/U6
	6362250	41007666	4	ENSBTAG00000047004/ENSBTAG00000018363/ENSBTAG00000053735/ENSBTAG00000043945/ENSBTAG00000024394	UMAD1/RBM48/PEG10/U6/SEMA3D
	7313536	13316709	4	ENSBTAG00000018363/ENSBTAG00000053735/ENSBTAG00000043945	RBM48/PEG10/U6
	7567292	72960813	4	ENSBTAG00000047004/ENSBTAG00000018363/ENSBTAG00000053735/ENSBTAG00000043945/ENSBTAG00000024394/ENSBTAG00000000189/ENSBTAG00000009207/ENSBTAG00000004398/ENSBTAG00000053964/ENSBTAG00000003490/ENSBTAG00000017541/ENSBTAG00000032650/ENSBTAG00000007870/ENSBTAG00000016223	UMAD1/RBM48/PEG10/U6/SEMA3D/LHFPL3/KMT2E/IMMP2L/4/ELMO1/TBX20/DPY19L2/FKBP14/SCRN1
	7624594	57829798	4	ENSBTAG00000047004/ENSBTAG00000018363/ENSBTAG00000053735/ENSBTAG00000043945/ENSBTAG00000024394/ENSBTAG00000000189/ENSBTAG00000009207/ENSBTAG00000004398	UMAD1/RBM48/PEG10/U6/SEMA3D/LHFPL3/KMT2E/IMMP2L
	7624594	82065122	4	ENSBTAG00000047004/ENSBTAG00000018363/ENSBTAG00000053735/ENSBTAG00000043945/ENSBTAG00000024394/ENSBTAG00000000189/ENSBTAG00000009207/ENSBTAG00000004398/ENSBTAG00000053964/ENSBTAG00000003490/ENSBTAG00000017541/ENSBTAG00000032650/ENSBTAG00000007870/ENSBTAG00000016223/ENSBTAG00000046334/ENSBTAG00000010504/ENSBTAG00000043398/ENSBTAG00000043541/ENSBTAG00000051248	UMAD1/RBM48/PEG10/U6/SEMA3D/LHFPL3/KMT2E/IMMP2L/4/ELMO1/TBX20/DPY19L2/FKBP14/SCRN1/4/TBRG4/SNORA5C/SNORA5A/4
	8625321	11118054	4	ENSBTAG00000018363	RBM48
	10450547	13462136	4	ENSBTAG00000053735/ENSBTAG00000043945	PEG10/U6
	10608965	57829798	4	ENSBTAG00000047004/ENSBTAG00000053735/ENSBTAG00000043945/ENSBTAG00000024394/ENSBTAG00000000189/ENSBTAG00000009207/ENSBTAG00000004398	UMAD1/PEG10/U6/SEMA3D/LHFPL3/KMT2E/IMMP2L
	11333624	72960813	4	ENSBTAG00000047004/ENSBTAG00000053735/ENSBTAG00000043945/ENSBTAG00000024394/ENSBTAG00000000189/ENSBTAG00000009207/ENSBTAG00000004398/ENSBTAG00000053964/ENSBTAG00000003490/ENSBTAG00000017541/ENSBTAG00000032650/ENSBTAG00000007870/ENSBTAG00000016223	UMAD1/PEG10/U6/SEMA3D/LHFPL3/KMT2E/IMMP2L/4/ELMO1/TBX20/DPY19L2/FKBP14/SCRN1
	11355642	90502505	4	ENSBTAG00000047004/ENSBTAG00000053735/ENSBTAG00000043945/ENSBTAG00000024394/ENSBTAG00000000189/ENSBTAG00000009207/ENSBTAG00000004398/ENSBTAG00000053964/ENSBTAG00000003490/ENSBTAG00000017541/ENSBTAG00000032650/ENSBTAG00000007870/ENSBTAG00000016223/ENSBTAG00000046334/ENSBTAG00000010504/ENSBTAG00000043398/ENSBTAG00000043541/ENSBTAG00000051248/ENSBTAG00000031967/ENSBTAG00000000144	UMAD1/PEG10/U6/SEMA3D/LHFPL3/KMT2E/IMMP2L/4/ELMO1/TBX20/DPY19L2/FKBP14/SCRN1/4/TBRG4/SNORA5C/SNORA5A/4/AMPH/4
	11560877	20545562	4	ENSBTAG00000047004/ENSBTAG00000053735/ENSBTAG00000043945	UMAD1/PEG10/U6
	15790583	18539967	4	ENSBTAG00000047004	UMAD1
	18477820	89052364	4	ENSBTAG00000024394/ENSBTAG00000000189/ENSBTAG00000009207/ENSBTAG00000004398/ENSBTAG00000053964/ENSBTAG00000003490/ENSBTAG00000017541/ENSBTAG00000032650/ENSBTAG00000007870/ENSBTAG00000016223/ENSBTAG00000046334/ENSBTAG00000010504/ENSBTAG00000043398/ENSBTAG00000043541/ENSBTAG00000051248/ENSBTAG00000031967/ENSBTAG00000000144	SEMA3D/LHFPL3/KMT2E/IMMP2L/4/ELMO1/TBX20/DPY19L2/FKBP14/SCRN1/4/TBRG4/SNORA5C/SNORA5A/4/AMPH/4
	18477820	105687948	4	ENSBTAG00000049834/ENSBTAG00000002431/ENSBTAG00000020225/ENSBTAG00000024394/ENSBTAG00000000189/ENSBTAG00000009207/ENSBTAG00000004398/ENSBTAG00000053964/ENSBTAG00000003490/ENSBTAG00000017541/ENSBTAG00000032650/ENSBTAG00000007870/ENSBTAG00000016223/ENSBTAG00000046334/ENSBTAG00000010504/ENSBTAG00000043398/ENSBTAG00000043541/ENSBTAG00000051248/ENSBTAG00000031967/ENSBTAG00000000144	4/TRIM24/TBXAS1/SEMA3D/LHFPL3/KMT2E/IMMP2L/4/ELMO1/TBX20/DPY19L2/FKBP14/SCRN1/4/TBRG4/SNORA5C/SNORA5A/4/AMPH/4
	19715038	49105752	4	ENSBTAG00000024394/ENSBTAG00000000189/ENSBTAG00000009207	SEMA3D/LHFPL3/KMT2E
	19836442	109073597	4	ENSBTAG00000049834/ENSBTAG00000002431/ENSBTAG00000020225/ENSBTAG00000049830/ENSBTAG00000024394/ENSBTAG00000000189/ENSBTAG00000009207/ENSBTAG00000004398/ENSBTAG00000053964/ENSBTAG00000003490/ENSBTAG00000017541/ENSBTAG00000032650/ENSBTAG00000007870/ENSBTAG00000016223/ENSBTAG00000046334/ENSBTAG00000010504/ENSBTAG00000043398/ENSBTAG00000043541/ENSBTAG00000051248/ENSBTAG00000031967/ENSBTAG00000000144	4/TRIM24/TBXAS1/4/SEMA3D/LHFPL3/KMT2E/IMMP2L/4/ELMO1/TBX20/DPY19L2/FKBP14/SCRN1/4/TBRG4/SNORA5C/SNORA5A/4/AMPH/4
	19899410	80836727	4	ENSBTAG00000024394/ENSBTAG00000000189/ENSBTAG00000009207/ENSBTAG00000004398/ENSBTAG00000053964/ENSBTAG00000003490/ENSBTAG00000017541/ENSBTAG00000032650/ENSBTAG00000007870/ENSBTAG00000016223/ENSBTAG00000046334/ENSBTAG00000010504/ENSBTAG00000043398/ENSBTAG00000043541/ENSBTAG00000051248	SEMA3D/LHFPL3/KMT2E/IMMP2L/4/ELMO1/TBX20/DPY19L2/FKBP14/SCRN1/4/TBRG4/SNORA5C/SNORA5A/4
	20431018	72960813	4	ENSBTAG00000024394/ENSBTAG00000000189/ENSBTAG00000009207/ENSBTAG00000004398/ENSBTAG00000053964/ENSBTAG00000003490/ENSBTAG00000017541/ENSBTAG00000032650/ENSBTAG00000007870/ENSBTAG00000016223	SEMA3D/LHFPL3/KMT2E/IMMP2L/4/ELMO1/TBX20/DPY19L2/FKBP14/SCRN1
	23293692	60635433	4	ENSBTAG00000024394/ENSBTAG00000000189/ENSBTAG00000009207/ENSBTAG00000004398/ENSBTAG00000053964/ENSBTAG00000003490	SEMA3D/LHFPL3/KMT2E/IMMP2L/4/ELMO1
	30927747	59752165	4	ENSBTAG00000024394/ENSBTAG00000000189/ENSBTAG00000009207/ENSBTAG00000004398	SEMA3D/LHFPL3/KMT2E/IMMP2L
	33496136	35903023	4	ENSBTAG00000024394	SEMA3D
	36468716	59752165	4	ENSBTAG00000000189/ENSBTAG00000009207/ENSBTAG00000004398	LHFPL3/KMT2E/IMMP2L
	41376527	60521073	4	ENSBTAG00000000189/ENSBTAG00000009207/ENSBTAG00000004398/ENSBTAG00000053964/ENSBTAG00000003490	LHFPL3/KMT2E/IMMP2L/4/ELMO1
	42065119	82065122	4	ENSBTAG00000000189/ENSBTAG00000009207/ENSBTAG00000004398/ENSBTAG00000053964/ENSBTAG00000003490/ENSBTAG00000017541/ENSBTAG00000032650/ENSBTAG00000007870/ENSBTAG00000016223/ENSBTAG00000046334/ENSBTAG00000010504/ENSBTAG00000043398/ENSBTAG00000043541/ENSBTAG00000051248	LHFPL3/KMT2E/IMMP2L/4/ELMO1/TBX20/DPY19L2/FKBP14/SCRN1/4/TBRG4/SNORA5C/SNORA5A/4
	42916786	91770132	4	ENSBTAG00000000189/ENSBTAG00000009207/ENSBTAG00000004398/ENSBTAG00000053964/ENSBTAG00000003490/ENSBTAG00000017541/ENSBTAG00000032650/ENSBTAG00000007870/ENSBTAG00000016223/ENSBTAG00000046334/ENSBTAG00000010504/ENSBTAG00000043398/ENSBTAG00000043541/ENSBTAG00000051248/ENSBTAG00000031967/ENSBTAG00000000144	LHFPL3/KMT2E/IMMP2L/4/ELMO1/TBX20/DPY19L2/FKBP14/SCRN1/4/TBRG4/SNORA5C/SNORA5A/4/AMPH/4
	42916786	120641946	4	ENSBTAG00000049834/ENSBTAG00000002431/ENSBTAG00000020225/ENSBTAG00000049830/ENSBTAG00000051633/ENSBTAG00000018917/ENSBTAG00000000189/ENSBTAG00000009207/ENSBTAG00000004398/ENSBTAG00000053964/ENSBTAG00000003490/ENSBTAG00000017541/ENSBTAG00000032650/ENSBTAG00000007870/ENSBTAG00000016223/ENSBTAG00000046334/ENSBTAG00000010504/ENSBTAG00000043398/ENSBTAG00000043541/ENSBTAG00000051248/ENSBTAG00000031967/…	4/TRIM24/TBXAS1/4/4/EN2/LHFPL3/KMT2E/IMMP2L/4/ELMO1/TBX20/DPY19L2/FKBP14/SCRN1/4/TBRG4/SNORA5C/SNORA5A/4/AMPH/4
	43175304	73699663	4	ENSBTAG00000000189/ENSBTAG00000009207/ENSBTAG00000004398/ENSBTAG00000053964/ENSBTAG00000003490/ENSBTAG00000017541/ENSBTAG00000032650/ENSBTAG00000007870/ENSBTAG00000016223	LHFPL3/KMT2E/IMMP2L/4/ELMO1/TBX20/DPY19L2/FKBP14/SCRN1
	43556172	47094789	4	ENSBTAG00000000189/ENSBTAG00000009207	LHFPL3/KMT2E
	44400745	105464613	4	ENSBTAG00000049834/ENSBTAG00000002431/ENSBTAG00000020225/ENSBTAG00000000189/ENSBTAG00000009207/ENSBTAG00000004398/ENSBTAG00000053964/ENSBTAG00000003490/ENSBTAG00000017541/ENSBTAG00000032650/ENSBTAG00000007870/ENSBTAG00000016223/ENSBTAG00000046334/ENSBTAG00000010504/ENSBTAG00000043398/ENSBTAG00000043541/ENSBTAG00000051248/ENSBTAG00000031967/ENSBTAG00000000144	4/TRIM24/TBXAS1/LHFPL3/KMT2E/IMMP2L/4/ELMO1/TBX20/DPY19L2/FKBP14/SCRN1/4/TBRG4/SNORA5C/SNORA5A/4/AMPH/4
	46358600	63617795	4	ENSBTAG00000004398/ENSBTAG00000053964/ENSBTAG00000003490/ENSBTAG00000017541/ENSBTAG00000032650	IMMP2L/4/ELMO1/TBX20/DPY19L2
	48492026	80836727	4	ENSBTAG00000004398/ENSBTAG00000053964/ENSBTAG00000003490/ENSBTAG00000017541/ENSBTAG00000032650/ENSBTAG00000007870/ENSBTAG00000016223/ENSBTAG00000046334/ENSBTAG00000010504/ENSBTAG00000043398/ENSBTAG00000043541/ENSBTAG00000051248	IMMP2L/4/ELMO1/TBX20/DPY19L2/FKBP14/SCRN1/4/TBRG4/SNORA5C/SNORA5A/4
	48492026	90703088	4	ENSBTAG00000004398/ENSBTAG00000053964/ENSBTAG00000003490/ENSBTAG00000017541/ENSBTAG00000032650/ENSBTAG00000007870/ENSBTAG00000016223/ENSBTAG00000046334/ENSBTAG00000010504/ENSBTAG00000043398/ENSBTAG00000043541/ENSBTAG00000051248/ENSBTAG00000031967/ENSBTAG00000000144	IMMP2L/4/ELMO1/TBX20/DPY19L2/FKBP14/SCRN1/4/TBRG4/SNORA5C/SNORA5A/4/AMPH/4
	55050570	57673965	4	ENSBTAG00000004398	IMMP2L
	56428646	70537648	4	ENSBTAG00000004398/ENSBTAG00000053964/ENSBTAG00000003490/ENSBTAG00000017541/ENSBTAG00000032650/ENSBTAG00000007870/ENSBTAG00000016223	IMMP2L/4/ELMO1/TBX20/DPY19L2/FKBP14/SCRN1
	57630023	60635433	4	ENSBTAG00000004398/ENSBTAG00000053964/ENSBTAG00000003490	IMMP2L/4/ELMO1
	58757127	60809733	4	ENSBTAG00000053964/ENSBTAG00000003490	4/ELMO1
	59216486	63518623	4	ENSBTAG00000053964/ENSBTAG00000003490/ENSBTAG00000017541/ENSBTAG00000032650	4/ELMO1/TBX20/DPY19L2
	59509462	96770424	4	ENSBTAG00000053964/ENSBTAG00000003490/ENSBTAG00000017541/ENSBTAG00000032650/ENSBTAG00000007870/ENSBTAG00000016223/ENSBTAG00000046334/ENSBTAG00000010504/ENSBTAG00000043398/ENSBTAG00000043541/ENSBTAG00000051248/ENSBTAG00000031967/ENSBTAG00000000144	4/ELMO1/TBX20/DPY19L2/FKBP14/SCRN1/4/TBRG4/SNORA5C/SNORA5A/4/AMPH/4
	59647887	73205902	4	ENSBTAG00000053964/ENSBTAG00000003490/ENSBTAG00000017541/ENSBTAG00000032650/ENSBTAG00000007870/ENSBTAG00000016223	4/ELMO1/TBX20/DPY19L2/FKBP14/SCRN1
	59813010	65019614	4	ENSBTAG00000003490/ENSBTAG00000017541/ENSBTAG00000032650	ELMO1/TBX20/DPY19L2
	61542387	66731649	4	ENSBTAG00000017541/ENSBTAG00000032650/ENSBTAG00000007870/ENSBTAG00000016223	TBX20/DPY19L2/FKBP14/SCRN1
	61818594	64351574	4	ENSBTAG00000017541/ENSBTAG00000032650	TBX20/DPY19L2
	61871789	64492908	4	ENSBTAG00000032650	DPY19L2
	62876037	87086801	4	ENSBTAG00000007870/ENSBTAG00000016223/ENSBTAG00000046334/ENSBTAG00000010504/ENSBTAG00000043398/ENSBTAG00000043541/ENSBTAG00000051248/ENSBTAG00000031967/ENSBTAG00000000144	FKBP14/SCRN1/4/TBRG4/SNORA5C/SNORA5A/4/AMPH/4
	64351574	72071212	4	ENSBTAG00000007870/ENSBTAG00000016223	FKBP14/SCRN1
	72830739	76524685	4	ENSBTAG00000046334/ENSBTAG00000010504	4/TBRG4
	73058537	105557665	4	ENSBTAG00000049834/ENSBTAG00000002431/ENSBTAG00000020225/ENSBTAG00000046334/ENSBTAG00000010504/ENSBTAG00000043398/ENSBTAG00000043541/ENSBTAG00000051248/ENSBTAG00000031967/ENSBTAG00000000144	4/TRIM24/TBXAS1/4/TBRG4/SNORA5C/SNORA5A/4/AMPH/4
	73058537	111843890	4	ENSBTAG00000049834/ENSBTAG00000002431/ENSBTAG00000020225/ENSBTAG00000049830/ENSBTAG00000051633/ENSBTAG00000046334/ENSBTAG00000010504/ENSBTAG00000043398/ENSBTAG00000043541/ENSBTAG00000051248/ENSBTAG00000031967/ENSBTAG00000000144	4/TRIM24/TBXAS1/4/4/4/TBRG4/SNORA5C/SNORA5A/4/AMPH/4
	73367338	120641946	4	ENSBTAG00000049834/ENSBTAG00000002431/ENSBTAG00000020225/ENSBTAG00000049830/ENSBTAG00000051633/ENSBTAG00000018917/ENSBTAG00000046334/ENSBTAG00000010504/ENSBTAG00000043398/ENSBTAG00000043541/ENSBTAG00000051248/ENSBTAG00000031967/ENSBTAG00000000144	4/TRIM24/TBXAS1/4/4/EN2/4/TBRG4/SNORA5C/SNORA5A/4/AMPH/4
	73791282	111514528	4	ENSBTAG00000049834/ENSBTAG00000002431/ENSBTAG00000020225/ENSBTAG00000049830/ENSBTAG00000046334/ENSBTAG00000010504/ENSBTAG00000043398/ENSBTAG00000043541/ENSBTAG00000051248/ENSBTAG00000031967/ENSBTAG00000000144	4/TRIM24/TBXAS1/4/4/TBRG4/SNORA5C/SNORA5A/4/AMPH/4
	75780515	78247625	4	ENSBTAG00000046334/ENSBTAG00000010504/ENSBTAG00000043398/ENSBTAG00000043541/ENSBTAG00000051248	4/TBRG4/SNORA5C/SNORA5A/4
	76286055	87984576	4	ENSBTAG00000046334/ENSBTAG00000010504/ENSBTAG00000043398/ENSBTAG00000043541/ENSBTAG00000051248/ENSBTAG00000031967/ENSBTAG00000000144	4/TBRG4/SNORA5C/SNORA5A/4/AMPH/4
	77150031	101570978	4	ENSBTAG00000049834/ENSBTAG00000031967/ENSBTAG00000000144	4/AMPH/4
	78765530	83668226	4	ENSBTAG00000031967/ENSBTAG00000000144	AMPH/4
	80303139	82496288	4	ENSBTAG00000031967	AMPH
	80932460	110755563	4	ENSBTAG00000049834/ENSBTAG00000002431/ENSBTAG00000020225/ENSBTAG00000049830/ENSBTAG00000031967/ENSBTAG00000000144	4/TRIM24/TBXAS1/4/AMPH/4
	82146398	105575675	4	ENSBTAG00000049834/ENSBTAG00000002431/ENSBTAG00000020225/ENSBTAG00000031967/ENSBTAG00000000144	4/TRIM24/TBXAS1/AMPH/4
	82146398	114277500	4	ENSBTAG00000049834/ENSBTAG00000002431/ENSBTAG00000020225/ENSBTAG00000049830/ENSBTAG00000051633/ENSBTAG00000031967/ENSBTAG00000000144	4/TRIM24/TBXAS1/4/4/AMPH/4
	86058682	109292250	4	ENSBTAG00000049834/ENSBTAG00000002431/ENSBTAG00000020225/ENSBTAG00000049830	4/TRIM24/TBXAS1/4
	89183425	112345822	4	ENSBTAG00000049834/ENSBTAG00000002431/ENSBTAG00000020225/ENSBTAG00000049830/ENSBTAG00000051633	4/TRIM24/TBXAS1/4/4
	96123597	102570116	4	ENSBTAG00000049834/ENSBTAG00000002431	4/TRIM24
	96410729	120641946	4	ENSBTAG00000049834/ENSBTAG00000002431/ENSBTAG00000020225/ENSBTAG00000049830/ENSBTAG00000051633/ENSBTAG00000018917	4/TRIM24/TBXAS1/4/4/EN2
	96861591	107246504	4	ENSBTAG00000049834/ENSBTAG00000002431/ENSBTAG00000020225	4/TRIM24/TBXAS1
	102128919	105169576	4	ENSBTAG00000002431/ENSBTAG00000020225	TRIM24/TBXAS1
	108076254	120641946	4	ENSBTAG00000051633/ENSBTAG00000018917	4/EN2
	117027527	120641946	4	ENSBTAG00000018917	EN2
	97111	3073140	5	ENSBTAG00000018575	TRHDE
	10735432	27724108	5	ENSBTAG00000007447	NUDT4
	16357425	50602685	5	ENSBTAG00000007447/ENSBTAG00000049929/ENSBTAG00000020564/ENSBTAG00000000198	NUDT4/5/5/5
	22599252	81437878	5	ENSBTAG00000007447/ENSBTAG00000015792/ENSBTAG00000048834/ENSBTAG00000017287/ENSBTAG00000012793/ENSBTAG00000020634/ENSBTAG00000008137/ENSBTAG00000048453/ENSBTAG00000000606/ENSBTAG00000049929/ENSBTAG00000020564/ENSBTAG00000000198	NUDT4/CFAP54/5/DRAM1/5/FBXO7/5/5/SYT10/5/5/5
	24458645	82540690	5	ENSBTAG00000015792/ENSBTAG00000048834/ENSBTAG00000017287/ENSBTAG00000012793/ENSBTAG00000020634/ENSBTAG00000008137/ENSBTAG00000048453/ENSBTAG00000000606/ENSBTAG00000049929/ENSBTAG00000020564/ENSBTAG00000000198	CFAP54/5/DRAM1/5/FBXO7/5/5/SYT10/5/5/5
	24820395	63404875	5	ENSBTAG00000015792/ENSBTAG00000049929/ENSBTAG00000020564/ENSBTAG00000000198	CFAP54/5/5/5
	33665735	89425557	5	ENSBTAG00000015792/ENSBTAG00000048834/ENSBTAG00000017287/ENSBTAG00000012793/ENSBTAG00000020634/ENSBTAG00000008137/ENSBTAG00000048453/ENSBTAG00000000606/ENSBTAG00000002313/ENSBTAG00000049929/ENSBTAG00000020564/ENSBTAG00000000198	CFAP54/5/DRAM1/5/FBXO7/5/5/SYT10/ITPR2/5/5/5
	47559492	89512928	5	ENSBTAG00000015792/ENSBTAG00000048834/ENSBTAG00000017287/ENSBTAG00000012793/ENSBTAG00000020634/ENSBTAG00000008137/ENSBTAG00000048453/ENSBTAG00000000606/ENSBTAG00000002313	CFAP54/5/DRAM1/5/FBXO7/5/5/SYT10/ITPR2
	48973445	82818374	5	ENSBTAG00000015792/ENSBTAG00000048834/ENSBTAG00000017287/ENSBTAG00000012793/ENSBTAG00000020634/ENSBTAG00000008137/ENSBTAG00000048453/ENSBTAG00000000606	CFAP54/5/DRAM1/5/FBXO7/5/5/SYT10
	50708781	71187703	5	ENSBTAG00000015792/ENSBTAG00000048834/ENSBTAG00000017287/ENSBTAG00000012793/ENSBTAG00000020634	CFAP54/5/DRAM1/5/FBXO7
	58067406	62345992	5	ENSBTAG00000015792	CFAP54
	60373086	104818406	5	ENSBTAG00000015792/ENSBTAG00000048834/ENSBTAG00000017287/ENSBTAG00000012793/ENSBTAG00000020634/ENSBTAG00000008137/ENSBTAG00000048453/ENSBTAG00000000606/ENSBTAG00000002313/ENSBTAG00000004721	CFAP54/5/DRAM1/5/FBXO7/5/5/SYT10/ITPR2/GSG1
	62644905	68380218	5	ENSBTAG00000048834/ENSBTAG00000017287/ENSBTAG00000012793	5/DRAM1/5
	63535381	82540690	5	ENSBTAG00000048834/ENSBTAG00000017287/ENSBTAG00000012793/ENSBTAG00000020634/ENSBTAG00000008137/ENSBTAG00000048453/ENSBTAG00000000606	5/DRAM1/5/FBXO7/5/5/SYT10
	64043730	72178038	5	ENSBTAG00000017287/ENSBTAG00000012793/ENSBTAG00000020634	DRAM1/5/FBXO7
	64043730	82540690	5	ENSBTAG00000017287/ENSBTAG00000012793/ENSBTAG00000020634/ENSBTAG00000008137/ENSBTAG00000048453/ENSBTAG00000000606	DRAM1/5/FBXO7/5/5/SYT10
	64043730	88959021	5	ENSBTAG00000017287/ENSBTAG00000012793/ENSBTAG00000020634/ENSBTAG00000008137/ENSBTAG00000048453/ENSBTAG00000000606/ENSBTAG00000002313	DRAM1/5/FBXO7/5/5/SYT10/ITPR2
	69189819	99384838	5	ENSBTAG00000020634/ENSBTAG00000008137/ENSBTAG00000048453/ENSBTAG00000000606/ENSBTAG00000002313/ENSBTAG00000004721	FBXO7/5/5/SYT10/ITPR2/GSG1
	69548960	72691446	5	ENSBTAG00000020634	FBXO7
	70969212	77177828	5	ENSBTAG00000020634/ENSBTAG00000008137/ENSBTAG00000048453/ENSBTAG00000000606	FBXO7/5/5/SYT10
	70969212	85537311	5	ENSBTAG00000020634/ENSBTAG00000008137/ENSBTAG00000048453/ENSBTAG00000000606/ENSBTAG00000002313	FBXO7/5/5/SYT10/ITPR2
	71587478	83099970	5	ENSBTAG00000008137/ENSBTAG00000048453/ENSBTAG00000000606/ENSBTAG00000002313	5/5/SYT10/ITPR2
	72390588	102343832	5	ENSBTAG00000008137/ENSBTAG00000048453/ENSBTAG00000000606/ENSBTAG00000002313/ENSBTAG00000004721	5/5/SYT10/ITPR2/GSG1
	72552593	76317361	5	ENSBTAG00000008137/ENSBTAG00000048453/ENSBTAG00000000606	5/5/SYT10
	76227370	78776781	5	ENSBTAG00000000606	SYT10
	81612132	120718722	5	ENSBTAG00000002313/ENSBTAG00000004721/ENSBTAG00000049605/ENSBTAG00000009704/ENSBTAG00000002782/ENSBTAG00000016580/ENSBTAG00000050336/ENSBTAG00000013173/ENSBTAG00000013174/ENSBTAG00000049724/ENSBTAG00000018073/ENSBTAG00000017652/ENSBTAG00000048396/ENSBTAG00000009351	ITPR2/GSG1/5/CECR2/ZC3H7B/TEF/5/SEPTIN3/WBP2NL/5/TSPO/NUP50/5/ATXN10
	82356558	85373640	5	ENSBTAG00000002313	ITPR2
	82563090	99384838	5	ENSBTAG00000002313/ENSBTAG00000004721	ITPR2/GSG1
	86085385	103478830	5	ENSBTAG00000004721	GSG1
	91408594	121175859	5	ENSBTAG00000004721/ENSBTAG00000049605/ENSBTAG00000009704/ENSBTAG00000002782/ENSBTAG00000016580/ENSBTAG00000050336/ENSBTAG00000013173/ENSBTAG00000013174/ENSBTAG00000049724/ENSBTAG00000018073/ENSBTAG00000017652/ENSBTAG00000048396/ENSBTAG00000009351	GSG1/5/CECR2/ZC3H7B/TEF/5/SEPTIN3/WBP2NL/5/TSPO/NUP50/5/ATXN10
	96190402	113012498	5	ENSBTAG00000004721/ENSBTAG00000049605/ENSBTAG00000009704/ENSBTAG00000002782/ENSBTAG00000016580/ENSBTAG00000050336/ENSBTAG00000013173/ENSBTAG00000013174	GSG1/5/CECR2/ZC3H7B/TEF/5/SEPTIN3/WBP2NL
	107105116	109134816	5	ENSBTAG00000049605/ENSBTAG00000009704	5/CECR2
	108107405	112472630	5	ENSBTAG00000049605/ENSBTAG00000009704/ENSBTAG00000002782	5/CECR2/ZC3H7B
	108551135	116005043	5	ENSBTAG00000049605/ENSBTAG00000009704/ENSBTAG00000002782/ENSBTAG00000016580/ENSBTAG00000050336/ENSBTAG00000013173/ENSBTAG00000013174/ENSBTAG00000049724/ENSBTAG00000018073/ENSBTAG00000017652/ENSBTAG00000048396	5/CECR2/ZC3H7B/TEF/5/SEPTIN3/WBP2NL/5/TSPO/NUP50/5
	108721301	119139076	5	ENSBTAG00000049605/ENSBTAG00000009704/ENSBTAG00000002782/ENSBTAG00000016580/ENSBTAG00000050336/ENSBTAG00000013173/ENSBTAG00000013174/ENSBTAG00000049724/ENSBTAG00000018073/ENSBTAG00000017652/ENSBTAG00000048396/ENSBTAG00000009351	5/CECR2/ZC3H7B/TEF/5/SEPTIN3/WBP2NL/5/TSPO/NUP50/5/ATXN10
	109024613	111348123	5	ENSBTAG00000009704	CECR2
	110149999	113175424	5	ENSBTAG00000002782/ENSBTAG00000016580/ENSBTAG00000050336/ENSBTAG00000013173/ENSBTAG00000013174	ZC3H7B/TEF/5/SEPTIN3/WBP2NL
	110435582	112775479	5	ENSBTAG00000002782/ENSBTAG00000016580	ZC3H7B/TEF
	111635921	116252285	5	ENSBTAG00000002782/ENSBTAG00000016580/ENSBTAG00000050336/ENSBTAG00000013173/ENSBTAG00000013174/ENSBTAG00000049724/ENSBTAG00000018073/ENSBTAG00000017652/ENSBTAG00000048396/ENSBTAG00000009351	ZC3H7B/TEF/5/SEPTIN3/WBP2NL/5/TSPO/NUP50/5/ATXN10
	111709914	115649625	5	ENSBTAG00000002782/ENSBTAG00000016580/ENSBTAG00000050336/ENSBTAG00000013173/ENSBTAG00000013174/ENSBTAG00000049724/ENSBTAG00000018073/ENSBTAG00000017652	ZC3H7B/TEF/5/SEPTIN3/WBP2NL/5/TSPO/NUP50
	111709914	113914967	5	ENSBTAG00000002782/ENSBTAG00000016580/ENSBTAG00000050336/ENSBTAG00000013173/ENSBTAG00000013174/ENSBTAG00000049724	ZC3H7B/TEF/5/SEPTIN3/WBP2NL/5
	111858987	115146217	5	ENSBTAG00000002782/ENSBTAG00000016580/ENSBTAG00000050336/ENSBTAG00000013173/ENSBTAG00000013174/ENSBTAG00000049724/ENSBTAG00000018073	ZC3H7B/TEF/5/SEPTIN3/WBP2NL/5/TSPO
	112591306	115423180	5	ENSBTAG00000050336/ENSBTAG00000013173/ENSBTAG00000013174/ENSBTAG00000049724/ENSBTAG00000018073	5/SEPTIN3/WBP2NL/5/TSPO
	112686649	116167919	5	ENSBTAG00000050336/ENSBTAG00000013173/ENSBTAG00000013174/ENSBTAG00000049724/ENSBTAG00000018073/ENSBTAG00000017652/ENSBTAG00000048396/ENSBTAG00000009351	5/SEPTIN3/WBP2NL/5/TSPO/NUP50/5/ATXN10
	112686649	115878450	5	ENSBTAG00000050336/ENSBTAG00000013173/ENSBTAG00000013174/ENSBTAG00000049724/ENSBTAG00000018073/ENSBTAG00000017652/ENSBTAG00000048396	5/SEPTIN3/WBP2NL/5/TSPO/NUP50/5
	113010972	115633531	5	ENSBTAG00000013174/ENSBTAG00000049724/ENSBTAG00000018073/ENSBTAG00000017652	WBP2NL/5/TSPO/NUP50
	113010972	115817966	5	ENSBTAG00000013174/ENSBTAG00000049724/ENSBTAG00000018073/ENSBTAG00000017652/ENSBTAG00000048396	WBP2NL/5/TSPO/NUP50/5
	113010972	115423180	5	ENSBTAG00000013174/ENSBTAG00000049724/ENSBTAG00000018073	WBP2NL/5/TSPO
	113411233	115633531	5	ENSBTAG00000049724/ENSBTAG00000018073/ENSBTAG00000017652	5/TSPO/NUP50
	113737833	115848256	5	ENSBTAG00000049724/ENSBTAG00000018073/ENSBTAG00000017652/ENSBTAG00000048396	5/TSPO/NUP50/5
	113817271	119023407	5	ENSBTAG00000049724/ENSBTAG00000018073/ENSBTAG00000017652/ENSBTAG00000048396/ENSBTAG00000009351	5/TSPO/NUP50/5/ATXN10
	114621971	116861955	5	ENSBTAG00000017652/ENSBTAG00000048396/ENSBTAG00000009351	NUP50/5/ATXN10
	36766	16643876	6	ENSBTAG00000051854/ENSBTAG00000053284/ENSBTAG00000034501	6/6/CFI
	36766	39500950	6	ENSBTAG00000051854/ENSBTAG00000053284/ENSBTAG00000034501/ENSBTAG00000006844/ENSBTAG00000034206/ENSBTAG00000050731/ENSBTAG00000055148	6/6/CFI/LEF1/EMCN/6/6
	36766	70186855	6	ENSBTAG00000051854/ENSBTAG00000053284/ENSBTAG00000034501/ENSBTAG00000006844/ENSBTAG00000034206/ENSBTAG00000050731/ENSBTAG00000055148/ENSBTAG00000049215/ENSBTAG00000017837	6/6/CFI/LEF1/EMCN/6/6/SHISA3/GABRB1
	6807282	27647533	6	ENSBTAG00000051854/ENSBTAG00000053284/ENSBTAG00000034501/ENSBTAG00000006844/ENSBTAG00000034206	6/6/CFI/LEF1/EMCN
	6807282	23565493	6	ENSBTAG00000051854/ENSBTAG00000053284/ENSBTAG00000034501/ENSBTAG00000006844	6/6/CFI/LEF1
	11398621	22834033	6	ENSBTAG00000053284/ENSBTAG00000034501/ENSBTAG00000006844	6/CFI/LEF1
	11746541	26205206	6	ENSBTAG00000053284/ENSBTAG00000034501/ENSBTAG00000006844/ENSBTAG00000034206	6/CFI/LEF1/EMCN
	13167458	39486775	6	ENSBTAG00000053284/ENSBTAG00000034501/ENSBTAG00000006844/ENSBTAG00000034206/ENSBTAG00000050731/ENSBTAG00000055148	6/CFI/LEF1/EMCN/6/6
	14633122	17010510	6	ENSBTAG00000053284/ENSBTAG00000034501	6/CFI
	15808841	27479224	6	ENSBTAG00000006844/ENSBTAG00000034206	LEF1/EMCN
	16327200	18260174	6	ENSBTAG00000006844	LEF1
	16736054	91812788	6	ENSBTAG00000006844/ENSBTAG00000034206/ENSBTAG00000050731/ENSBTAG00000055148/ENSBTAG00000049215/ENSBTAG00000017837/ENSBTAG00000002928/ENSBTAG00000004793/ENSBTAG00000010346/ENSBTAG00000017121/ENSBTAG00000017131/ENSBTAG00000047833/ENSBTAG00000049436	LEF1/EMCN/6/6/SHISA3/GABRB1/AMTN/AMBN/ENAM/ALB/AFP/AFM/6
	16922089	38481946	6	ENSBTAG00000006844/ENSBTAG00000034206/ENSBTAG00000050731/ENSBTAG00000055148	LEF1/EMCN/6/6
	16960877	72434618	6	ENSBTAG00000006844/ENSBTAG00000034206/ENSBTAG00000050731/ENSBTAG00000055148/ENSBTAG00000049215/ENSBTAG00000017837	LEF1/EMCN/6/6/SHISA3/GABRB1
	17324822	42213458	6	ENSBTAG00000034206/ENSBTAG00000050731/ENSBTAG00000055148	EMCN/6/6
	20475948	71350048	6	ENSBTAG00000034206/ENSBTAG00000050731/ENSBTAG00000055148/ENSBTAG00000049215/ENSBTAG00000017837	EMCN/6/6/SHISA3/GABRB1
	22672648	25033485	6	ENSBTAG00000034206	EMCN
	25175118	62788712	6	ENSBTAG00000050731/ENSBTAG00000055148/ENSBTAG00000049215	6/6/SHISA3
	25593943	104385502	6	ENSBTAG00000018360/ENSBTAG00000003959/ENSBTAG00000014947/ENSBTAG00000006508/ENSBTAG00000011170/ENSBTAG00000050731/ENSBTAG00000055148/ENSBTAG00000049215/ENSBTAG00000017837/ENSBTAG00000002928/ENSBTAG00000004793/ENSBTAG00000010346/ENSBTAG00000017121/ENSBTAG00000017131/ENSBTAG00000047833/ENSBTAG00000049436	MRPL1/ARHGAP24/PTPN13/6/JAKMIP1/6/6/SHISA3/GABRB1/AMTN/AMBN/ENAM/ALB/AFP/AFM/6
	28805419	88677866	6	ENSBTAG00000050731/ENSBTAG00000055148/ENSBTAG00000049215/ENSBTAG00000017837/ENSBTAG00000002928/ENSBTAG00000004793/ENSBTAG00000010346/ENSBTAG00000017121/ENSBTAG00000017131/ENSBTAG00000047833/ENSBTAG00000049436	6/6/SHISA3/GABRB1/AMTN/AMBN/ENAM/ALB/AFP/AFM/6
	29203934	74546008	6	ENSBTAG00000050731/ENSBTAG00000055148/ENSBTAG00000049215/ENSBTAG00000017837	6/6/SHISA3/GABRB1
	36316624	74881485	6	ENSBTAG00000049215/ENSBTAG00000017837	SHISA3/GABRB1
	38564979	88677866	6	ENSBTAG00000049215/ENSBTAG00000017837/ENSBTAG00000002928/ENSBTAG00000004793/ENSBTAG00000010346/ENSBTAG00000017121/ENSBTAG00000017131/ENSBTAG00000047833/ENSBTAG00000049436	SHISA3/GABRB1/AMTN/AMBN/ENAM/ALB/AFP/AFM/6
	39511572	87398712	6	ENSBTAG00000049215/ENSBTAG00000017837/ENSBTAG00000002928/ENSBTAG00000004793/ENSBTAG00000010346	SHISA3/GABRB1/AMTN/AMBN/ENAM
	52793934	106517122	6	ENSBTAG00000018360/ENSBTAG00000003959/ENSBTAG00000014947/ENSBTAG00000006508/ENSBTAG00000011170/ENSBTAG00000049215/ENSBTAG00000017837/ENSBTAG00000002928/ENSBTAG00000004793/ENSBTAG00000010346/ENSBTAG00000017121/ENSBTAG00000017131/ENSBTAG00000047833/ENSBTAG00000049436	MRPL1/ARHGAP24/PTPN13/6/JAKMIP1/SHISA3/GABRB1/AMTN/AMBN/ENAM/ALB/AFP/AFM/6
	59515328	61810659	6	ENSBTAG00000049215	SHISA3
	60942991	100328689	6	ENSBTAG00000018360/ENSBTAG00000049215/ENSBTAG00000017837/ENSBTAG00000002928/ENSBTAG00000004793/ENSBTAG00000010346/ENSBTAG00000017121/ENSBTAG00000017131/ENSBTAG00000047833/ENSBTAG00000049436	MRPL1/SHISA3/GABRB1/AMTN/AMBN/ENAM/ALB/AFP/AFM/6
	64888552	68495611	6	ENSBTAG00000017837	GABRB1
	65190332	111772448	6	ENSBTAG00000018360/ENSBTAG00000003959/ENSBTAG00000014947/ENSBTAG00000006508/ENSBTAG00000011170/ENSBTAG00000017837/ENSBTAG00000002928/ENSBTAG00000004793/ENSBTAG00000010346/ENSBTAG00000017121/ENSBTAG00000017131/ENSBTAG00000047833/ENSBTAG00000049436	MRPL1/ARHGAP24/PTPN13/6/JAKMIP1/GABRB1/AMTN/AMBN/ENAM/ALB/AFP/AFM/6
	67320544	95891516	6	ENSBTAG00000018360/ENSBTAG00000002928/ENSBTAG00000004793/ENSBTAG00000010346/ENSBTAG00000017121/ENSBTAG00000017131/ENSBTAG00000047833/ENSBTAG00000049436	MRPL1/AMTN/AMBN/ENAM/ALB/AFP/AFM/6
	69026906	87471880	6	ENSBTAG00000002928/ENSBTAG00000004793/ENSBTAG00000010346	AMTN/AMBN/ENAM
	69925170	112741017	6	ENSBTAG00000018360/ENSBTAG00000003959/ENSBTAG00000014947/ENSBTAG00000006508/ENSBTAG00000011170/ENSBTAG00000002928/ENSBTAG00000004793/ENSBTAG00000010346/ENSBTAG00000017121/ENSBTAG00000017131/ENSBTAG00000047833/ENSBTAG00000049436	MRPL1/ARHGAP24/PTPN13/6/JAKMIP1/AMTN/AMBN/ENAM/ALB/AFP/AFM/6
	79450422	89823313	6	ENSBTAG00000002928/ENSBTAG00000004793/ENSBTAG00000010346/ENSBTAG00000017121/ENSBTAG00000017131/ENSBTAG00000047833/ENSBTAG00000049436	AMTN/AMBN/ENAM/ALB/AFP/AFM/6
	79616541	102093022	6	ENSBTAG00000018360/ENSBTAG00000003959/ENSBTAG00000014947/ENSBTAG00000002928/ENSBTAG00000004793/ENSBTAG00000010346/ENSBTAG00000017121/ENSBTAG00000017131/ENSBTAG00000047833/ENSBTAG00000049436	MRPL1/ARHGAP24/PTPN13/AMTN/AMBN/ENAM/ALB/AFP/AFM/6
	81261666	116714864	6	ENSBTAG00000018360/ENSBTAG00000003959/ENSBTAG00000014947/ENSBTAG00000006508/ENSBTAG00000011170/ENSBTAG00000001504/ENSBTAG00000021130/ENSBTAG00000002928/ENSBTAG00000004793/ENSBTAG00000010346/ENSBTAG00000017121/ENSBTAG00000017131/ENSBTAG00000047833/ENSBTAG00000049436	MRPL1/ARHGAP24/PTPN13/6/JAKMIP1/NOP14/MFSD10/AMTN/AMBN/ENAM/ALB/AFP/AFM/6
	86207116	101819607	6	ENSBTAG00000018360/ENSBTAG00000003959/ENSBTAG00000014947/ENSBTAG00000017121/ENSBTAG00000017131/ENSBTAG00000047833/ENSBTAG00000049436	MRPL1/ARHGAP24/PTPN13/ALB/AFP/AFM/6
	87471880	89139865	6	ENSBTAG00000017121/ENSBTAG00000017131/ENSBTAG00000047833/ENSBTAG00000049436	ALB/AFP/AFM/6
	87801255	95037527	6	ENSBTAG00000018360/ENSBTAG00000017121/ENSBTAG00000017131/ENSBTAG00000047833/ENSBTAG00000049436	MRPL1/ALB/AFP/AFM/6
	87838493	107720898	6	ENSBTAG00000018360/ENSBTAG00000003959/ENSBTAG00000014947/ENSBTAG00000006508/ENSBTAG00000011170/ENSBTAG00000017121/ENSBTAG00000017131/ENSBTAG00000047833/ENSBTAG00000049436	MRPL1/ARHGAP24/PTPN13/6/JAKMIP1/ALB/AFP/AFM/6
	87838493	119216563	6	ENSBTAG00000018360/ENSBTAG00000003959/ENSBTAG00000014947/ENSBTAG00000006508/ENSBTAG00000011170/ENSBTAG00000001504/ENSBTAG00000021130/ENSBTAG00000017121/ENSBTAG00000017131/ENSBTAG00000047833/ENSBTAG00000049436	MRPL1/ARHGAP24/PTPN13/6/JAKMIP1/NOP14/MFSD10/ALB/AFP/AFM/6
	88735599	102438275	6	ENSBTAG00000018360/ENSBTAG00000003959/ENSBTAG00000014947	MRPL1/ARHGAP24/PTPN13
	88735599	102703257	6	ENSBTAG00000018360/ENSBTAG00000003959/ENSBTAG00000014947/ENSBTAG00000006508	MRPL1/ARHGAP24/PTPN13/6
	89199262	101149293	6	ENSBTAG00000018360/ENSBTAG00000003959	MRPL1/ARHGAP24
	90160155	103505813	6	ENSBTAG00000018360/ENSBTAG00000003959/ENSBTAG00000014947/ENSBTAG00000006508/ENSBTAG00000011170	MRPL1/ARHGAP24/PTPN13/6/JAKMIP1
	91485845	94890117	6	ENSBTAG00000018360	MRPL1
	98230507	100734907	6	ENSBTAG00000003959	ARHGAP24
	100018664	102995977	6	ENSBTAG00000003959/ENSBTAG00000014947/ENSBTAG00000006508	ARHGAP24/PTPN13/6
	100186246	103133828	6	ENSBTAG00000003959/ENSBTAG00000014947/ENSBTAG00000006508/ENSBTAG00000011170	ARHGAP24/PTPN13/6/JAKMIP1
	100802891	119216563	6	ENSBTAG00000003959/ENSBTAG00000014947/ENSBTAG00000006508/ENSBTAG00000011170/ENSBTAG00000001504/ENSBTAG00000021130	ARHGAP24/PTPN13/6/JAKMIP1/NOP14/MFSD10
	101096589	102995977	6	ENSBTAG00000014947/ENSBTAG00000006508	PTPN13/6
	101967984	116931851	6	ENSBTAG00000006508/ENSBTAG00000011170/ENSBTAG00000001504/ENSBTAG00000021130	6/JAKMIP1/NOP14/MFSD10
	102019388	104835345	6	ENSBTAG00000006508/ENSBTAG00000011170	6/JAKMIP1
	102684648	106352920	6	ENSBTAG00000011170	JAKMIP1
	109775773	116864937	6	ENSBTAG00000001504/ENSBTAG00000021130	NOP14/MFSD10
	115809462	117333781	6	ENSBTAG00000021130	MFSD10
	10880	894707	7	ENSBTAG00000002215	GFPT2
	244816	6353800	7	ENSBTAG00000002215/ENSBTAG00000004709	GFPT2/MAPK9
	927609	5422882	7	ENSBTAG00000004709	MAPK9
	7845456	70370024	7	ENSBTAG00000006762/ENSBTAG00000050541/ENSBTAG00000010487/ENSBTAG00000005800/ENSBTAG00000019646/ENSBTAG00000019771/ENSBTAG00000020269/ENSBTAG00000045828/ENSBTAG00000045829/ENSBTAG00000049418/ENSBTAG00000046105/ENSBTAG00000002473/ENSBTAG00000002475/ENSBTAG00000021036/ENSBTAG00000021039/ENSBTAG00000027151	SH3RF2/U6/SMIM3/GRIA1/TRIM41/PALM/MISP/PTBP1/AZU1/U6/PRTN3/ANGPTL4/RAB11B/MARCHF2/HNRNPM/ARHGAP26
	7845456	76367006	7	ENSBTAG00000006762/ENSBTAG00000050541/ENSBTAG00000010487/ENSBTAG00000005800/ENSBTAG00000030286/ENSBTAG00000019646/ENSBTAG00000019771/ENSBTAG00000020269/ENSBTAG00000045828/ENSBTAG00000045829/ENSBTAG00000049418/ENSBTAG00000046105/ENSBTAG00000002473/ENSBTAG00000002475/ENSBTAG00000021036/ENSBTAG00000021039/ENSBTAG00000027151	SH3RF2/U6/SMIM3/GRIA1/GABRA1/TRIM41/PALM/MISP/PTBP1/AZU1/U6/PRTN3/ANGPTL4/RAB11B/MARCHF2/HNRNPM/ARHGAP26
	7845456	93423885	7	ENSBTAG00000006762/ENSBTAG00000050541/ENSBTAG00000010487/ENSBTAG00000005800/ENSBTAG00000030286/ENSBTAG00000019646/ENSBTAG00000024275/ENSBTAG00000028668/ENSBTAG00000019771/ENSBTAG00000020269/ENSBTAG00000045828/ENSBTAG00000044077/ENSBTAG00000045829/ENSBTAG00000049418/ENSBTAG00000046105/ENSBTAG00000002473/ENSBTAG00000002475/ENSBTAG00000021036/ENSBTAG00000021039/ENSBTAG00000027151	SH3RF2/U6/SMIM3/GRIA1/GABRA1/TRIM41/XRCC4/5S_rRNA/PALM/MISP/PTBP1/POLR3G/AZU1/U6/PRTN3/ANGPTL4/RAB11B/MARCHF2/HNRNPM/ARHGAP26
	13366744	30227179	7	ENSBTAG00000050541/ENSBTAG00000002473/ENSBTAG00000002475/ENSBTAG00000021036/ENSBTAG00000021039	U6/ANGPTL4/RAB11B/MARCHF2/HNRNPM
	15624067	18283528	7	ENSBTAG00000002473/ENSBTAG00000002475/ENSBTAG00000021036/ENSBTAG00000021039	ANGPTL4/RAB11B/MARCHF2/HNRNPM
	21881973	48089488	7	ENSBTAG00000050541/ENSBTAG00000019646/ENSBTAG00000019771/ENSBTAG00000020269/ENSBTAG00000045828/ENSBTAG00000045829/ENSBTAG00000049418/ENSBTAG00000046105	U6/TRIM41/PALM/MISP/PTBP1/AZU1/U6/PRTN3
	33027483	98820742	7	ENSBTAG00000006762/ENSBTAG00000010487/ENSBTAG00000005800/ENSBTAG00000030286/ENSBTAG00000019646/ENSBTAG00000024275/ENSBTAG00000028668/ENSBTAG00000019771/ENSBTAG00000020269/ENSBTAG00000045828/ENSBTAG00000044077/ENSBTAG00000045829/ENSBTAG00000049418/ENSBTAG00000046105/ENSBTAG00000027151	SH3RF2/SMIM3/GRIA1/GABRA1/TRIM41/XRCC4/5S_rRNA/PALM/MISP/PTBP1/POLR3G/AZU1/U6/PRTN3/ARHGAP26
	33099337	74066243	7	ENSBTAG00000006762/ENSBTAG00000010487/ENSBTAG00000005800/ENSBTAG00000030286/ENSBTAG00000019646/ENSBTAG00000019771/ENSBTAG00000020269/ENSBTAG00000045828/ENSBTAG00000045829/ENSBTAG00000049418/ENSBTAG00000046105/ENSBTAG00000027151	SH3RF2/SMIM3/GRIA1/GABRA1/TRIM41/PALM/MISP/PTBP1/AZU1/U6/PRTN3/ARHGAP26
	34324708	58294551	7	ENSBTAG00000006762/ENSBTAG00000019646/ENSBTAG00000019771/ENSBTAG00000020269/ENSBTAG00000045828/ENSBTAG00000045829/ENSBTAG00000049418/ENSBTAG00000046105/ENSBTAG00000027151	SH3RF2/TRIM41/PALM/MISP/PTBP1/AZU1/U6/PRTN3/ARHGAP26
	34460403	73328258	7	ENSBTAG00000006762/ENSBTAG00000010487/ENSBTAG00000005800/ENSBTAG00000019646/ENSBTAG00000019771/ENSBTAG00000020269/ENSBTAG00000045828/ENSBTAG00000045829/ENSBTAG00000049418/ENSBTAG00000046105/ENSBTAG00000027151	SH3RF2/SMIM3/GRIA1/TRIM41/PALM/MISP/PTBP1/AZU1/U6/PRTN3/ARHGAP26
	40290621	43359066	7	ENSBTAG00000019646/ENSBTAG00000019771/ENSBTAG00000020269	TRIM41/PALM/MISP
	40337451	42645056	7	ENSBTAG00000019646	TRIM41
	42788788	93218452	7	ENSBTAG00000006762/ENSBTAG00000010487/ENSBTAG00000005800/ENSBTAG00000030286/ENSBTAG00000024275/ENSBTAG00000028668/ENSBTAG00000019771/ENSBTAG00000020269/ENSBTAG00000045828/ENSBTAG00000044077/ENSBTAG00000045829/ENSBTAG00000049418/ENSBTAG00000046105/ENSBTAG00000027151	SH3RF2/SMIM3/GRIA1/GABRA1/XRCC4/5S_rRNA/PALM/MISP/PTBP1/POLR3G/AZU1/U6/PRTN3/ARHGAP26
	43292715	48709232	7	ENSBTAG00000019771/ENSBTAG00000020269/ENSBTAG00000045828/ENSBTAG00000045829/ENSBTAG00000049418/ENSBTAG00000046105	PALM/MISP/PTBP1/AZU1/U6/PRTN3
	50350967	79012351	7	ENSBTAG00000006762/ENSBTAG00000010487/ENSBTAG00000005800/ENSBTAG00000030286/ENSBTAG00000027151	SH3RF2/SMIM3/GRIA1/GABRA1/ARHGAP26
	50966893	55711594	7	ENSBTAG00000027151	ARHGAP26
	53664924	64659545	7	ENSBTAG00000006762/ENSBTAG00000010487/ENSBTAG00000027151	SH3RF2/SMIM3/ARHGAP26
	53859609	60414842	7	ENSBTAG00000006762/ENSBTAG00000027151	SH3RF2/ARHGAP26
	54632239	57807550	7	ENSBTAG00000006762	SH3RF2
	55434939	63363012	7	ENSBTAG00000006762/ENSBTAG00000010487	SH3RF2/SMIM3
	56081309	94783893	7	ENSBTAG00000006762/ENSBTAG00000010487/ENSBTAG00000005800/ENSBTAG00000030286/ENSBTAG00000024275/ENSBTAG00000028668/ENSBTAG00000044077	SH3RF2/SMIM3/GRIA1/GABRA1/XRCC4/5S_rRNA/POLR3G
	57816101	66758460	7	ENSBTAG00000010487/ENSBTAG00000005800	SMIM3/GRIA1
	59447780	112628884	7	ENSBTAG00000010487/ENSBTAG00000005800/ENSBTAG00000030286/ENSBTAG00000024275/ENSBTAG00000028668/ENSBTAG00000044077/ENSBTAG00000051701	SMIM3/GRIA1/GABRA1/XRCC4/5S_rRNA/POLR3G/7
	60628965	77833266	7	ENSBTAG00000010487/ENSBTAG00000005800/ENSBTAG00000030286	SMIM3/GRIA1/GABRA1
	61956669	63843833	7	ENSBTAG00000010487	SMIM3
	63547825	65761014	7	ENSBTAG00000005800	GRIA1
	65071894	76441186	7	ENSBTAG00000005800/ENSBTAG00000030286	GRIA1/GABRA1
	70118464	91507089	7	ENSBTAG00000030286/ENSBTAG00000024275/ENSBTAG00000028668/ENSBTAG00000044077	GABRA1/XRCC4/5S_rRNA/POLR3G
	71066660	73854810	7	ENSBTAG00000030286	GABRA1
	75893393	90621200	7	ENSBTAG00000024275/ENSBTAG00000028668/ENSBTAG00000044077	XRCC4/5S_rRNA/POLR3G
	79403685	112610067	7	ENSBTAG00000024275/ENSBTAG00000028668/ENSBTAG00000044077/ENSBTAG00000051701	XRCC4/5S_rRNA/POLR3G/7
	81634761	85712075	7	ENSBTAG00000024275	XRCC4
	82583952	89800236	7	ENSBTAG00000024275/ENSBTAG00000028668	XRCC4/5S_rRNA
	85957647	90058029	7	ENSBTAG00000028668/ENSBTAG00000044077	5S_rRNA/POLR3G
	86485159	89658972	7	ENSBTAG00000028668	5S_rRNA
	89183262	90498814	7	ENSBTAG00000044077	POLR3G
	106872297	108992486	7	ENSBTAG00000051701
	20855	1676311	8	ENSBTAG00000001081	PALLD
	20855	6230206	8	ENSBTAG00000001081/ENSBTAG00000035007	PALLD/GALNTL6
	20855	14787533	8	ENSBTAG00000001081/ENSBTAG00000035007/ENSBTAG00000054255/ENSBTAG00000051632/ENSBTAG00000008845/ENSBTAG00000005907/ENSBTAG00000005905	PALLD/GALNTL6/DEFB134/DEFB136/INTS9/NDUFB6/TOPORS
	20855	113626199	8	ENSBTAG00000007872/ENSBTAG00000005092/ENSBTAG00000043919/ENSBTAG00000055211/ENSBTAG00000044341/ENSBTAG00000006831/ENSBTAG00000032983/ENSBTAG00000052126/ENSBTAG00000004010/ENSBTAG00000053221/ENSBTAG00000001081/ENSBTAG00000003540/ENSBTAG00000050986/ENSBTAG00000035007/ENSBTAG00000054255/ENSBTAG00000051632/ENSBTAG00000031793/ENSBTAG00000008845/ENSBTAG00000005907/ENSBTAG00000005905	PSIP1/ROR2/U6/8/U6/C8H9orf85/FOXB2/8/PAPPA/8/PALLD/MYT1L/PXDN/GALNTL6/DEFB134/DEFB136/NUDT2/INTS9/NDUFB6/TOPORS
	357078	91667879	8	ENSBTAG00000007872/ENSBTAG00000005092/ENSBTAG00000043919/ENSBTAG00000055211/ENSBTAG00000044341/ENSBTAG00000006831/ENSBTAG00000032983/ENSBTAG00000052126/ENSBTAG00000001081/ENSBTAG00000035007/ENSBTAG00000054255/ENSBTAG00000051632/ENSBTAG00000031793/ENSBTAG00000008845/ENSBTAG00000005907/ENSBTAG00000005905	PSIP1/ROR2/U6/8/U6/C8H9orf85/FOXB2/8/PALLD/GALNTL6/DEFB134/DEFB136/NUDT2/INTS9/NDUFB6/TOPORS
	1923632	4998120	8	ENSBTAG00000035007	GALNTL6
	3397003	10523947	8	ENSBTAG00000035007/ENSBTAG00000054255/ENSBTAG00000051632/ENSBTAG00000008845	GALNTL6/DEFB134/DEFB136/INTS9
	3737837	8340612	8	ENSBTAG00000035007/ENSBTAG00000054255/ENSBTAG00000051632	GALNTL6/DEFB134/DEFB136
	4865961	7495233	8	ENSBTAG00000054255	DEFB134
	5614675	11996971	8	ENSBTAG00000054255/ENSBTAG00000051632/ENSBTAG00000008845/ENSBTAG00000005907/ENSBTAG00000005905	DEFB134/DEFB136/INTS9/NDUFB6/TOPORS
	7068364	9761857	8	ENSBTAG00000054255/ENSBTAG00000051632	DEFB134/DEFB136
	8071001	10760167	8	ENSBTAG00000008845	INTS9
	10140515	89587806	8	ENSBTAG00000007872/ENSBTAG00000005092/ENSBTAG00000043919/ENSBTAG00000055211/ENSBTAG00000044341/ENSBTAG00000006831/ENSBTAG00000032983/ENSBTAG00000052126/ENSBTAG00000031793/ENSBTAG00000005907/ENSBTAG00000005905	PSIP1/ROR2/U6/8/U6/C8H9orf85/FOXB2/8/NUDT2/NDUFB6/TOPORS
	10507032	17921077	8	ENSBTAG00000005907/ENSBTAG00000005905	NDUFB6/TOPORS
	10507032	82195153	8	ENSBTAG00000007872/ENSBTAG00000043919/ENSBTAG00000044341/ENSBTAG00000006831/ENSBTAG00000032983/ENSBTAG00000052126/ENSBTAG00000031793/ENSBTAG00000005907/ENSBTAG00000005905	PSIP1/U6/U6/C8H9orf85/FOXB2/8/NUDT2/NDUFB6/TOPORS
	10583143	87320037	8	ENSBTAG00000007872/ENSBTAG00000005092/ENSBTAG00000043919/ENSBTAG00000044341/ENSBTAG00000006831/ENSBTAG00000032983/ENSBTAG00000052126/ENSBTAG00000031793/ENSBTAG00000005907/ENSBTAG00000005905	PSIP1/ROR2/U6/U6/C8H9orf85/FOXB2/8/NUDT2/NDUFB6/TOPORS
	10583143	109328452	8	ENSBTAG00000007872/ENSBTAG00000005092/ENSBTAG00000043919/ENSBTAG00000055211/ENSBTAG00000044341/ENSBTAG00000006831/ENSBTAG00000032983/ENSBTAG00000052126/ENSBTAG00000004010/ENSBTAG00000053221/ENSBTAG00000031793/ENSBTAG00000005907/ENSBTAG00000005905	PSIP1/ROR2/U6/8/U6/C8H9orf85/FOXB2/8/PAPPA/8/NUDT2/NDUFB6/TOPORS
	10909676	42375411	8	ENSBTAG00000007872/ENSBTAG00000043919/ENSBTAG00000005907/ENSBTAG00000005905	PSIP1/U6/NDUFB6/TOPORS
	11640132	90015801	8	ENSBTAG00000007872/ENSBTAG00000005092/ENSBTAG00000043919/ENSBTAG00000055211/ENSBTAG00000044341/ENSBTAG00000006831/ENSBTAG00000032983/ENSBTAG00000052126/ENSBTAG00000031793	PSIP1/ROR2/U6/8/U6/C8H9orf85/FOXB2/8/NUDT2
	17440967	75977534	8	ENSBTAG00000007872/ENSBTAG00000043919/ENSBTAG00000044341/ENSBTAG00000006831/ENSBTAG00000032983/ENSBTAG00000052126/ENSBTAG00000031793	PSIP1/U6/U6/C8H9orf85/FOXB2/8/NUDT2
	25115125	63358564	8	ENSBTAG00000007872/ENSBTAG00000043919/ENSBTAG00000044341/ENSBTAG00000006831/ENSBTAG00000032983/ENSBTAG00000052126	PSIP1/U6/U6/C8H9orf85/FOXB2/8
	28464160	30946000	8	ENSBTAG00000007872	PSIP1
	28559343	41147533	8	ENSBTAG00000007872/ENSBTAG00000043919	PSIP1/U6
	35464882	89824596	8	ENSBTAG00000005092/ENSBTAG00000055211/ENSBTAG00000044341/ENSBTAG00000006831/ENSBTAG00000032983/ENSBTAG00000052126/ENSBTAG00000031793	ROR2/8/U6/C8H9orf85/FOXB2/8/NUDT2
	41660709	87302455	8	ENSBTAG00000005092/ENSBTAG00000044341/ENSBTAG00000006831/ENSBTAG00000032983/ENSBTAG00000052126/ENSBTAG00000031793	ROR2/U6/C8H9orf85/FOXB2/8/NUDT2
	46826308	54203968	8	ENSBTAG00000006831/ENSBTAG00000032983	C8H9orf85/FOXB2
	47041865	110015684	8	ENSBTAG00000005092/ENSBTAG00000055211/ENSBTAG00000006831/ENSBTAG00000032983/ENSBTAG00000052126/ENSBTAG00000004010/ENSBTAG00000053221/ENSBTAG00000031793	ROR2/8/C8H9orf85/FOXB2/8/PAPPA/8/NUDT2
	47366278	50904360	8	ENSBTAG00000006831	C8H9orf85
	47437417	84852998	8	ENSBTAG00000006831/ENSBTAG00000032983/ENSBTAG00000052126/ENSBTAG00000031793	C8H9orf85/FOXB2/8/NUDT2
	47437417	65228923	8	ENSBTAG00000006831/ENSBTAG00000032983/ENSBTAG00000052126	C8H9orf85/FOXB2/8
	49620001	87320037	8	ENSBTAG00000005092/ENSBTAG00000032983/ENSBTAG00000052126/ENSBTAG00000031793	ROR2/FOXB2/8/NUDT2
	50651804	64295905	8	ENSBTAG00000032983/ENSBTAG00000052126	FOXB2/8
	51982720	54129358	8	ENSBTAG00000032983	FOXB2
	55319864	83730419	8	ENSBTAG00000052126/ENSBTAG00000031793	8/NUDT2
	57559835	60736666	8	ENSBTAG00000052126
	63490939	89619126	8	ENSBTAG00000005092/ENSBTAG00000055211/ENSBTAG00000031793	ROR2/8/NUDT2
	64373060	113367096	8	ENSBTAG00000005092/ENSBTAG00000055211/ENSBTAG00000004010/ENSBTAG00000053221/ENSBTAG00000003540/ENSBTAG00000050986/ENSBTAG00000031793	ROR2/8/PAPPA/8/MYT1L/PXDN/NUDT2
	72578691	77578357	8	ENSBTAG00000031793	NUDT2
	83480253	86442366	8	ENSBTAG00000005092	ROR2
	84474299	87568636	8	ENSBTAG00000005092/ENSBTAG00000055211	ROR2/8
	86442366	113367096	8	ENSBTAG00000055211/ENSBTAG00000004010/ENSBTAG00000053221/ENSBTAG00000003540/ENSBTAG00000050986	8/PAPPA/8/MYT1L/PXDN
	97717526	105596681	8	ENSBTAG00000004010	PAPPA
	102361784	113367096	8	ENSBTAG00000004010/ENSBTAG00000053221/ENSBTAG00000003540/ENSBTAG00000050986	PAPPA/8/MYT1L/PXDN
	104862806	107243184	8	ENSBTAG00000004010/ENSBTAG00000053221	PAPPA/8
	106174871	113367096	8	ENSBTAG00000053221/ENSBTAG00000003540/ENSBTAG00000050986	8/MYT1L/PXDN
	110783585	113367096	8	ENSBTAG00000003540/ENSBTAG00000050986	MYT1L/PXDN
	112105	81558849	9	ENSBTAG00000015744/ENSBTAG00000018528/ENSBTAG00000049952/ENSBTAG00000043746/ENSBTAG00000006672/ENSBTAG00000018408/ENSBTAG00000003384/ENSBTAG00000054952/ENSBTAG00000015888/ENSBTAG00000003496/ENSBTAG00000032382/ENSBTAG00000005869/ENSBTAG00000012096/ENSBTAG00000003921/ENSBTAG00000003919/ENSBTAG00000024381	CCNC/USP45/9/7SK/SYNCRIP/SNX14/CEP162/9/PDE7B/AIG1/9/SENP6/BCKDHB/9/KIAA0408/MAN1A1
	9018195	21346163	9	ENSBTAG00000032382/ENSBTAG00000005869/ENSBTAG00000012096	9/SENP6/BCKDHB
	10370879	29910981	9	ENSBTAG00000032382/ENSBTAG00000005869/ENSBTAG00000012096/ENSBTAG00000003921/ENSBTAG00000003919	9/SENP6/BCKDHB/9/KIAA0408
	10621242	55471468	9	ENSBTAG00000015744/ENSBTAG00000018528/ENSBTAG00000032382/ENSBTAG00000005869/ENSBTAG00000012096/ENSBTAG00000003921/ENSBTAG00000003919/ENSBTAG00000024381	CCNC/USP45/9/SENP6/BCKDHB/9/KIAA0408/MAN1A1
	11434940	105688974	9	ENSBTAG00000015744/ENSBTAG00000018528/ENSBTAG00000049952/ENSBTAG00000043746/ENSBTAG00000006672/ENSBTAG00000018408/ENSBTAG00000003384/ENSBTAG00000054952/ENSBTAG00000015888/ENSBTAG00000003496/ENSBTAG00000009665/ENSBTAG00000026586/ENSBTAG00000015935/ENSBTAG00000048114/ENSBTAG00000014788/ENSBTAG00000044223/ENSBTAG00000004098/ENSBTAG00000018464/ENSBTAG00000013176/ENSBTAG00000032382/ENSBTAG00000005869/…	CCNC/USP45/9/7SK/SYNCRIP/SNX14/CEP162/9/PDE7B/AIG1/UTRN/PPP1R14C/IYD/9/AKAP12/bta-mir-2285e-2/ARMT1/ZDHHC14/SMOC2/9/SENP6/BCKDHB/9/KIAA0408/MAN1A1
	14535706	35083835	9	ENSBTAG00000032382/ENSBTAG00000005869/ENSBTAG00000012096/ENSBTAG00000003921/ENSBTAG00000003919/ENSBTAG00000024381	9/SENP6/BCKDHB/9/KIAA0408/MAN1A1
	14989177	17242764	9	ENSBTAG00000032382/ENSBTAG00000005869	9/SENP6
	15876356	75805249	9	ENSBTAG00000015744/ENSBTAG00000018528/ENSBTAG00000049952/ENSBTAG00000043746/ENSBTAG00000006672/ENSBTAG00000018408/ENSBTAG00000003384/ENSBTAG00000054952/ENSBTAG00000015888/ENSBTAG00000012096/ENSBTAG00000003921/ENSBTAG00000003919/ENSBTAG00000024381	CCNC/USP45/9/7SK/SYNCRIP/SNX14/CEP162/9/PDE7B/BCKDHB/9/KIAA0408/MAN1A1
	16151985	33594611	9	ENSBTAG00000012096/ENSBTAG00000003921/ENSBTAG00000003919/ENSBTAG00000024381	BCKDHB/9/KIAA0408/MAN1A1
	16658980	55471468	9	ENSBTAG00000015744/ENSBTAG00000018528/ENSBTAG00000012096/ENSBTAG00000003921/ENSBTAG00000003919/ENSBTAG00000024381	CCNC/USP45/BCKDHB/9/KIAA0408/MAN1A1
	17068501	85371206	9	ENSBTAG00000015744/ENSBTAG00000018528/ENSBTAG00000049952/ENSBTAG00000043746/ENSBTAG00000006672/ENSBTAG00000018408/ENSBTAG00000003384/ENSBTAG00000054952/ENSBTAG00000015888/ENSBTAG00000003496/ENSBTAG00000009665/ENSBTAG00000012096/ENSBTAG00000003921/ENSBTAG00000003919/ENSBTAG00000024381	CCNC/USP45/9/7SK/SYNCRIP/SNX14/CEP162/9/PDE7B/AIG1/UTRN/BCKDHB/9/KIAA0408/MAN1A1
	18046372	65658419	9	ENSBTAG00000015744/ENSBTAG00000018528/ENSBTAG00000049952/ENSBTAG00000043746/ENSBTAG00000006672/ENSBTAG00000018408/ENSBTAG00000003384/ENSBTAG00000012096/ENSBTAG00000003921/ENSBTAG00000003919/ENSBTAG00000024381	CCNC/USP45/9/7SK/SYNCRIP/SNX14/CEP162/BCKDHB/9/KIAA0408/MAN1A1
	18046372	105688974	9	ENSBTAG00000015744/ENSBTAG00000018528/ENSBTAG00000049952/ENSBTAG00000043746/ENSBTAG00000006672/ENSBTAG00000018408/ENSBTAG00000003384/ENSBTAG00000054952/ENSBTAG00000015888/ENSBTAG00000003496/ENSBTAG00000009665/ENSBTAG00000026586/ENSBTAG00000015935/ENSBTAG00000048114/ENSBTAG00000014788/ENSBTAG00000044223/ENSBTAG00000004098/ENSBTAG00000018464/ENSBTAG00000013176/ENSBTAG00000012096/ENSBTAG00000003921/…	CCNC/USP45/9/7SK/SYNCRIP/SNX14/CEP162/9/PDE7B/AIG1/UTRN/PPP1R14C/IYD/9/AKAP12/bta-mir-2285e-2/ARMT1/ZDHHC14/SMOC2/BCKDHB/9/KIAA0408/MAN1A1
	19718982	22396640	9	ENSBTAG00000012096	BCKDHB
	19876712	27487188	9	ENSBTAG00000012096/ENSBTAG00000003921/ENSBTAG00000003919	BCKDHB/9/KIAA0408
	22059097	38302047	9	ENSBTAG00000003921/ENSBTAG00000003919/ENSBTAG00000024381	9/KIAA0408/MAN1A1
	22755204	24979356	9	ENSBTAG00000003921/ENSBTAG00000003919	9/KIAA0408
	27896295	69290334	9	ENSBTAG00000015744/ENSBTAG00000018528/ENSBTAG00000049952/ENSBTAG00000043746/ENSBTAG00000006672/ENSBTAG00000018408/ENSBTAG00000003384/ENSBTAG00000054952/ENSBTAG00000024381	CCNC/USP45/9/7SK/SYNCRIP/SNX14/CEP162/9/MAN1A1
	27965979	75579371	9	ENSBTAG00000015744/ENSBTAG00000018528/ENSBTAG00000049952/ENSBTAG00000043746/ENSBTAG00000006672/ENSBTAG00000018408/ENSBTAG00000003384/ENSBTAG00000054952/ENSBTAG00000015888/ENSBTAG00000024381	CCNC/USP45/9/7SK/SYNCRIP/SNX14/CEP162/9/PDE7B/MAN1A1
	29535985	61797460	9	ENSBTAG00000015744/ENSBTAG00000018528/ENSBTAG00000049952/ENSBTAG00000043746/ENSBTAG00000024381	CCNC/USP45/9/7SK/MAN1A1
	30006014	32723535	9	ENSBTAG00000024381	MAN1A1
	31657538	55471468	9	ENSBTAG00000015744/ENSBTAG00000018528/ENSBTAG00000024381	CCNC/USP45/MAN1A1
	32484636	60756087	9	ENSBTAG00000015744/ENSBTAG00000018528/ENSBTAG00000049952/ENSBTAG00000043746	CCNC/USP45/9/7SK
	38460906	64167666	9	ENSBTAG00000015744/ENSBTAG00000018528/ENSBTAG00000049952/ENSBTAG00000043746/ENSBTAG00000006672/ENSBTAG00000018408	CCNC/USP45/9/7SK/SYNCRIP/SNX14
	38460906	85371206	9	ENSBTAG00000015744/ENSBTAG00000018528/ENSBTAG00000049952/ENSBTAG00000043746/ENSBTAG00000006672/ENSBTAG00000018408/ENSBTAG00000003384/ENSBTAG00000054952/ENSBTAG00000015888/ENSBTAG00000003496/ENSBTAG00000009665	CCNC/USP45/9/7SK/SYNCRIP/SNX14/CEP162/9/PDE7B/AIG1/UTRN
	38460906	92341063	9	ENSBTAG00000015744/ENSBTAG00000018528/ENSBTAG00000049952/ENSBTAG00000043746/ENSBTAG00000006672/ENSBTAG00000018408/ENSBTAG00000003384/ENSBTAG00000054952/ENSBTAG00000015888/ENSBTAG00000003496/ENSBTAG00000009665/ENSBTAG00000026586/ENSBTAG00000015935/ENSBTAG00000048114/ENSBTAG00000014788/ENSBTAG00000044223/ENSBTAG00000004098	CCNC/USP45/9/7SK/SYNCRIP/SNX14/CEP162/9/PDE7B/AIG1/UTRN/PPP1R14C/IYD/9/AKAP12/bta-mir-2285e-2/ARMT1
	38460906	101340656	9	ENSBTAG00000015744/ENSBTAG00000018528/ENSBTAG00000049952/ENSBTAG00000043746/ENSBTAG00000006672/ENSBTAG00000018408/ENSBTAG00000003384/ENSBTAG00000054952/ENSBTAG00000015888/ENSBTAG00000003496/ENSBTAG00000009665/ENSBTAG00000026586/ENSBTAG00000015935/ENSBTAG00000048114/ENSBTAG00000014788/ENSBTAG00000044223/ENSBTAG00000004098/ENSBTAG00000018464	CCNC/USP45/9/7SK/SYNCRIP/SNX14/CEP162/9/PDE7B/AIG1/UTRN/PPP1R14C/IYD/9/AKAP12/bta-mir-2285e-2/ARMT1/ZDHHC14
	38460906	105688974	9	ENSBTAG00000015744/ENSBTAG00000018528/ENSBTAG00000049952/ENSBTAG00000043746/ENSBTAG00000006672/ENSBTAG00000018408/ENSBTAG00000003384/ENSBTAG00000054952/ENSBTAG00000015888/ENSBTAG00000003496/ENSBTAG00000009665/ENSBTAG00000026586/ENSBTAG00000015935/ENSBTAG00000048114/ENSBTAG00000014788/ENSBTAG00000044223/ENSBTAG00000004098/ENSBTAG00000018464/ENSBTAG00000013176	CCNC/USP45/9/7SK/SYNCRIP/SNX14/CEP162/9/PDE7B/AIG1/UTRN/PPP1R14C/IYD/9/AKAP12/bta-mir-2285e-2/ARMT1/ZDHHC14/SMOC2
	40375752	68773418	9	ENSBTAG00000015744/ENSBTAG00000018528/ENSBTAG00000049952/ENSBTAG00000043746/ENSBTAG00000006672/ENSBTAG00000018408/ENSBTAG00000003384/ENSBTAG00000054952	CCNC/USP45/9/7SK/SYNCRIP/SNX14/CEP162/9
	41014321	67402244	9	ENSBTAG00000015744/ENSBTAG00000018528/ENSBTAG00000049952/ENSBTAG00000043746/ENSBTAG00000006672/ENSBTAG00000018408/ENSBTAG00000003384	CCNC/USP45/9/7SK/SYNCRIP/SNX14/CEP162
	43914249	79407633	9	ENSBTAG00000015744/ENSBTAG00000018528/ENSBTAG00000049952/ENSBTAG00000043746/ENSBTAG00000006672/ENSBTAG00000018408/ENSBTAG00000003384/ENSBTAG00000054952/ENSBTAG00000015888	CCNC/USP45/9/7SK/SYNCRIP/SNX14/CEP162/9/PDE7B
	48821695	50832512	9	ENSBTAG00000015744/ENSBTAG00000018528	CCNC/USP45
	51326132	74582787	9	ENSBTAG00000049952/ENSBTAG00000043746/ENSBTAG00000006672/ENSBTAG00000018408/ENSBTAG00000003384/ENSBTAG00000054952/ENSBTAG00000015888	9/7SK/SYNCRIP/SNX14/CEP162/9/PDE7B
	52530654	69996975	9	ENSBTAG00000049952/ENSBTAG00000043746/ENSBTAG00000006672/ENSBTAG00000018408/ENSBTAG00000003384/ENSBTAG00000054952	9/7SK/SYNCRIP/SNX14/CEP162/9
	55591384	81098768	9	ENSBTAG00000049952/ENSBTAG00000043746/ENSBTAG00000006672/ENSBTAG00000018408/ENSBTAG00000003384/ENSBTAG00000054952/ENSBTAG00000015888/ENSBTAG00000003496	9/7SK/SYNCRIP/SNX14/CEP162/9/PDE7B/AIG1
	55591384	91618764	9	ENSBTAG00000049952/ENSBTAG00000043746/ENSBTAG00000006672/ENSBTAG00000018408/ENSBTAG00000003384/ENSBTAG00000054952/ENSBTAG00000015888/ENSBTAG00000003496/ENSBTAG00000009665/ENSBTAG00000026586/ENSBTAG00000015935/ENSBTAG00000048114/ENSBTAG00000014788/ENSBTAG00000044223/ENSBTAG00000004098	9/7SK/SYNCRIP/SNX14/CEP162/9/PDE7B/AIG1/UTRN/PPP1R14C/IYD/9/AKAP12/bta-mir-2285e-2/ARMT1
	55591384	105552514	9	ENSBTAG00000049952/ENSBTAG00000043746/ENSBTAG00000006672/ENSBTAG00000018408/ENSBTAG00000003384/ENSBTAG00000054952/ENSBTAG00000015888/ENSBTAG00000003496/ENSBTAG00000009665/ENSBTAG00000026586/ENSBTAG00000015935/ENSBTAG00000048114/ENSBTAG00000014788/ENSBTAG00000044223/ENSBTAG00000004098/ENSBTAG00000018464/ENSBTAG00000013176	9/7SK/SYNCRIP/SNX14/CEP162/9/PDE7B/AIG1/UTRN/PPP1R14C/IYD/9/AKAP12/bta-mir-2285e-2/ARMT1/ZDHHC14/SMOC2
	56129132	58647319	9	ENSBTAG00000049952/ENSBTAG00000043746	9/7SK
	58011347	66183555	9	ENSBTAG00000049952/ENSBTAG00000043746/ENSBTAG00000006672/ENSBTAG00000018408/ENSBTAG00000003384	9/7SK/SYNCRIP/SNX14/CEP162
	59739125	102259480	9	ENSBTAG00000006672/ENSBTAG00000018408/ENSBTAG00000003384/ENSBTAG00000054952/ENSBTAG00000015888/ENSBTAG00000003496/ENSBTAG00000009665/ENSBTAG00000026586/ENSBTAG00000015935/ENSBTAG00000048114/ENSBTAG00000014788/ENSBTAG00000044223/ENSBTAG00000004098/ENSBTAG00000018464	SYNCRIP/SNX14/CEP162/9/PDE7B/AIG1/UTRN/PPP1R14C/IYD/9/AKAP12/bta-mir-2285e-2/ARMT1/ZDHHC14
	62429359	65154296	9	ENSBTAG00000006672/ENSBTAG00000018408	SYNCRIP/SNX14
	62591320	81324086	9	ENSBTAG00000006672/ENSBTAG00000018408/ENSBTAG00000003384/ENSBTAG00000054952/ENSBTAG00000015888/ENSBTAG00000003496	SYNCRIP/SNX14/CEP162/9/PDE7B/AIG1
	62787861	65384777	9	ENSBTAG00000006672/ENSBTAG00000018408/ENSBTAG00000003384	SYNCRIP/SNX14/CEP162
	62996226	70145896	9	ENSBTAG00000006672/ENSBTAG00000018408/ENSBTAG00000003384/ENSBTAG00000054952	SYNCRIP/SNX14/CEP162/9
	63605529	90423605	9	ENSBTAG00000006672/ENSBTAG00000018408/ENSBTAG00000003384/ENSBTAG00000054952/ENSBTAG00000015888/ENSBTAG00000003496/ENSBTAG00000009665/ENSBTAG00000026586/ENSBTAG00000015935/ENSBTAG00000048114/ENSBTAG00000014788/ENSBTAG00000044223/ENSBTAG00000004098	SYNCRIP/SNX14/CEP162/9/PDE7B/AIG1/UTRN/PPP1R14C/IYD/9/AKAP12/bta-mir-2285e-2/ARMT1
	64373956	68475660	9	ENSBTAG00000003384/ENSBTAG00000054952	CEP162/9
	65738419	80859295	9	ENSBTAG00000054952/ENSBTAG00000015888/ENSBTAG00000003496	9/PDE7B/AIG1
	66292441	75805249	9	ENSBTAG00000054952/ENSBTAG00000015888	9/PDE7B
	67645572	105688974	9	ENSBTAG00000054952/ENSBTAG00000015888/ENSBTAG00000003496/ENSBTAG00000009665/ENSBTAG00000026586/ENSBTAG00000015935/ENSBTAG00000048114/ENSBTAG00000014788/ENSBTAG00000044223/ENSBTAG00000004098/ENSBTAG00000018464/ENSBTAG00000013176	9/PDE7B/AIG1/UTRN/PPP1R14C/IYD/9/AKAP12/bta-mir-2285e-2/ARMT1/ZDHHC14/SMOC2
	70301692	105552514	9	ENSBTAG00000015888/ENSBTAG00000003496/ENSBTAG00000009665/ENSBTAG00000026586/ENSBTAG00000015935/ENSBTAG00000048114/ENSBTAG00000014788/ENSBTAG00000044223/ENSBTAG00000004098/ENSBTAG00000018464/ENSBTAG00000013176	PDE7B/AIG1/UTRN/PPP1R14C/IYD/9/AKAP12/bta-mir-2285e-2/ARMT1/ZDHHC14/SMOC2
	70612283	92115394	9	ENSBTAG00000015888/ENSBTAG00000003496/ENSBTAG00000009665/ENSBTAG00000026586/ENSBTAG00000015935/ENSBTAG00000048114/ENSBTAG00000014788/ENSBTAG00000044223/ENSBTAG00000004098	PDE7B/AIG1/UTRN/PPP1R14C/IYD/9/AKAP12/bta-mir-2285e-2/ARMT1
	71070353	101298878	9	ENSBTAG00000015888/ENSBTAG00000003496/ENSBTAG00000009665/ENSBTAG00000026586/ENSBTAG00000015935/ENSBTAG00000048114/ENSBTAG00000014788/ENSBTAG00000044223/ENSBTAG00000004098/ENSBTAG00000018464	PDE7B/AIG1/UTRN/PPP1R14C/IYD/9/AKAP12/bta-mir-2285e-2/ARMT1/ZDHHC14
	71202176	75780952	9	ENSBTAG00000015888	PDE7B
	76695973	80859295	9	ENSBTAG00000003496	AIG1
	78576880	105587941	9	ENSBTAG00000003496/ENSBTAG00000009665/ENSBTAG00000026586/ENSBTAG00000015935/ENSBTAG00000048114/ENSBTAG00000014788/ENSBTAG00000044223/ENSBTAG00000004098/ENSBTAG00000018464/ENSBTAG00000013176	AIG1/UTRN/PPP1R14C/IYD/9/AKAP12/bta-mir-2285e-2/ARMT1/ZDHHC14/SMOC2
	80090024	92520762	9	ENSBTAG00000003496/ENSBTAG00000009665/ENSBTAG00000026586/ENSBTAG00000015935/ENSBTAG00000048114/ENSBTAG00000014788/ENSBTAG00000044223/ENSBTAG00000004098	AIG1/UTRN/PPP1R14C/IYD/9/AKAP12/bta-mir-2285e-2/ARMT1
	80179000	82024459	9	ENSBTAG00000003496/ENSBTAG00000009665	AIG1/UTRN
	81677052	93094049	9	ENSBTAG00000009665/ENSBTAG00000026586/ENSBTAG00000015935/ENSBTAG00000048114/ENSBTAG00000014788/ENSBTAG00000044223/ENSBTAG00000004098	UTRN/PPP1R14C/IYD/9/AKAP12/bta-mir-2285e-2/ARMT1
	81745620	105552514	9	ENSBTAG00000009665/ENSBTAG00000026586/ENSBTAG00000015935/ENSBTAG00000048114/ENSBTAG00000014788/ENSBTAG00000044223/ENSBTAG00000004098/ENSBTAG00000018464/ENSBTAG00000013176	UTRN/PPP1R14C/IYD/9/AKAP12/bta-mir-2285e-2/ARMT1/ZDHHC14/SMOC2
	81749940	85301768	9	ENSBTAG00000009665	UTRN
	81821734	99135245	9	ENSBTAG00000009665/ENSBTAG00000026586/ENSBTAG00000015935/ENSBTAG00000048114/ENSBTAG00000014788/ENSBTAG00000044223/ENSBTAG00000004098/ENSBTAG00000018464	UTRN/PPP1R14C/IYD/9/AKAP12/bta-mir-2285e-2/ARMT1/ZDHHC14
	85333947	97647025	9	ENSBTAG00000026586/ENSBTAG00000015935/ENSBTAG00000048114/ENSBTAG00000014788/ENSBTAG00000044223/ENSBTAG00000004098/ENSBTAG00000018464	PPP1R14C/IYD/9/AKAP12/bta-mir-2285e-2/ARMT1/ZDHHC14
	85532211	105688974	9	ENSBTAG00000026586/ENSBTAG00000015935/ENSBTAG00000048114/ENSBTAG00000014788/ENSBTAG00000044223/ENSBTAG00000004098/ENSBTAG00000018464/ENSBTAG00000013176	PPP1R14C/IYD/9/AKAP12/bta-mir-2285e-2/ARMT1/ZDHHC14/SMOC2
	85565030	87759769	9	ENSBTAG00000026586/ENSBTAG00000015935/ENSBTAG00000048114	PPP1R14C/IYD/9
	85737168	92806579	9	ENSBTAG00000026586/ENSBTAG00000015935/ENSBTAG00000048114/ENSBTAG00000014788/ENSBTAG00000044223/ENSBTAG00000004098	PPP1R14C/IYD/9/AKAP12/bta-mir-2285e-2/ARMT1
	87497282	91405210	9	ENSBTAG00000015935/ENSBTAG00000048114/ENSBTAG00000014788/ENSBTAG00000044223/ENSBTAG00000004098	IYD/9/AKAP12/bta-mir-2285e-2/ARMT1
	91381065	103544256	9	ENSBTAG00000018464/ENSBTAG00000013176	ZDHHC14/SMOC2
	92909354	96058428	9	ENSBTAG00000018464	ZDHHC14
	100742806	105587941	9	ENSBTAG00000013176	SMOC2
	41893	14037907	10	ENSBTAG00000020201/ENSBTAG00000020202/ENSBTAG00000042164	S100Z/CRHBP/U6
	41893	46450370	10	ENSBTAG00000020201/ENSBTAG00000020202/ENSBTAG00000042164/ENSBTAG00000052439/ENSBTAG00000001671/ENSBTAG00000001675/ENSBTAG00000001694/ENSBTAG00000025814/ENSBTAG00000006708/ENSBTAG00000004990/ENSBTAG00000007638/ENSBTAG00000011037/ENSBTAG00000053677	S100Z/CRHBP/U6/10/RTF1/ITPKA/TYRO3/TMEM202/ARIH1/NEO1/PIF1/RBPMS2/HERC1
	41893	102813194	10	ENSBTAG00000020201/ENSBTAG00000020202/ENSBTAG00000052724/ENSBTAG00000014189/ENSBTAG00000008713/ENSBTAG00000042164/ENSBTAG00000052439/ENSBTAG00000001671/ENSBTAG00000001675/ENSBTAG00000001694/ENSBTAG00000025644/ENSBTAG00000025814/ENSBTAG00000006708/ENSBTAG00000004990/ENSBTAG00000007638/ENSBTAG00000011037/ENSBTAG00000053677/ENSBTAG00000019390/ENSBTAG00000015904/ENSBTAG00000021876/ENSBTAG00000011022/…	S100Z/CRHBP/10/RGS6/DCAF4/U6/10/RTF1/ITPKA/TYRO3/CALM1/TMEM202/ARIH1/NEO1/PIF1/RBPMS2/HERC1/CA12/RORA/WDR72/ARPP19/MYO5A/CYP19A1/TNFAIP8L3/10
	1268686	57611774	10	ENSBTAG00000020201/ENSBTAG00000020202/ENSBTAG00000042164/ENSBTAG00000052439/ENSBTAG00000001671/ENSBTAG00000001675/ENSBTAG00000001694/ENSBTAG00000025814/ENSBTAG00000006708/ENSBTAG00000004990/ENSBTAG00000007638/ENSBTAG00000011037/ENSBTAG00000053677/ENSBTAG00000019390/ENSBTAG00000015904/ENSBTAG00000021876	S100Z/CRHBP/U6/10/RTF1/ITPKA/TYRO3/TMEM202/ARIH1/NEO1/PIF1/RBPMS2/HERC1/CA12/RORA/WDR72
	2427056	90398096	10	ENSBTAG00000020201/ENSBTAG00000020202/ENSBTAG00000052724/ENSBTAG00000014189/ENSBTAG00000008713/ENSBTAG00000042164/ENSBTAG00000052439/ENSBTAG00000001671/ENSBTAG00000001675/ENSBTAG00000001694/ENSBTAG00000025814/ENSBTAG00000006708/ENSBTAG00000004990/ENSBTAG00000007638/ENSBTAG00000011037/ENSBTAG00000053677/ENSBTAG00000019390/ENSBTAG00000015904/ENSBTAG00000021876/ENSBTAG00000011022/ENSBTAG00000006489/…	S100Z/CRHBP/10/RGS6/DCAF4/U6/10/RTF1/ITPKA/TYRO3/TMEM202/ARIH1/NEO1/PIF1/RBPMS2/HERC1/CA12/RORA/WDR72/ARPP19/MYO5A/CYP19A1/TNFAIP8L3/10
	2974097	37709985	10	ENSBTAG00000020201/ENSBTAG00000020202/ENSBTAG00000042164/ENSBTAG00000052439/ENSBTAG00000001671/ENSBTAG00000001675/ENSBTAG00000001694/ENSBTAG00000025814/ENSBTAG00000006708/ENSBTAG00000004990	S100Z/CRHBP/U6/10/RTF1/ITPKA/TYRO3/TMEM202/ARIH1/NEO1
	4968122	17625573	10	ENSBTAG00000020201/ENSBTAG00000020202/ENSBTAG00000042164/ENSBTAG00000052439	S100Z/CRHBP/U6/10
	5264150	8842386	10	ENSBTAG00000020201/ENSBTAG00000020202	S100Z/CRHBP
	7943252	22339193	10	ENSBTAG00000020201/ENSBTAG00000020202/ENSBTAG00000042164/ENSBTAG00000052439/ENSBTAG00000025814/ENSBTAG00000006708/ENSBTAG00000004990	S100Z/CRHBP/U6/10/TMEM202/ARIH1/NEO1
	8711277	22339193	10	ENSBTAG00000042164/ENSBTAG00000052439/ENSBTAG00000025814/ENSBTAG00000006708/ENSBTAG00000004990	U6/10/TMEM202/ARIH1/NEO1
	10077206	19462017	10	ENSBTAG00000042164/ENSBTAG00000052439/ENSBTAG00000025814/ENSBTAG00000006708	U6/10/TMEM202/ARIH1
	11768173	13520857	10	ENSBTAG00000042164	U6
	13963034	103075927	10	ENSBTAG00000052724/ENSBTAG00000014189/ENSBTAG00000008713/ENSBTAG00000052439/ENSBTAG00000001671/ENSBTAG00000001675/ENSBTAG00000001694/ENSBTAG00000025644/ENSBTAG00000025814/ENSBTAG00000006708/ENSBTAG00000004990/ENSBTAG00000007638/ENSBTAG00000011037/ENSBTAG00000053677/ENSBTAG00000019390/ENSBTAG00000015904/ENSBTAG00000021876/ENSBTAG00000011022/ENSBTAG00000006489/ENSBTAG00000014890/ENSBTAG00000010472/…	10/RGS6/DCAF4/10/RTF1/ITPKA/TYRO3/CALM1/TMEM202/ARIH1/NEO1/PIF1/RBPMS2/HERC1/CA12/RORA/WDR72/ARPP19/MYO5A/CYP19A1/TNFAIP8L3/10
	16294889	76676504	10	ENSBTAG00000052439/ENSBTAG00000001671/ENSBTAG00000001675/ENSBTAG00000001694/ENSBTAG00000025814/ENSBTAG00000006708/ENSBTAG00000004990/ENSBTAG00000007638/ENSBTAG00000011037/ENSBTAG00000053677/ENSBTAG00000019390/ENSBTAG00000015904/ENSBTAG00000021876/ENSBTAG00000011022/ENSBTAG00000006489/ENSBTAG00000014890/ENSBTAG00000010472/ENSBTAG00000049100	10/RTF1/ITPKA/TYRO3/TMEM202/ARIH1/NEO1/PIF1/RBPMS2/HERC1/CA12/RORA/WDR72/ARPP19/MYO5A/CYP19A1/TNFAIP8L3/10
	16432723	89081278	10	ENSBTAG00000052724/ENSBTAG00000014189/ENSBTAG00000008713/ENSBTAG00000052439/ENSBTAG00000001671/ENSBTAG00000001675/ENSBTAG00000001694/ENSBTAG00000025814/ENSBTAG00000006708/ENSBTAG00000004990/ENSBTAG00000007638/ENSBTAG00000011037/ENSBTAG00000053677/ENSBTAG00000019390/ENSBTAG00000015904/ENSBTAG00000021876/ENSBTAG00000011022/ENSBTAG00000006489/ENSBTAG00000014890/ENSBTAG00000010472/ENSBTAG00000049100	10/RGS6/DCAF4/10/RTF1/ITPKA/TYRO3/TMEM202/ARIH1/NEO1/PIF1/RBPMS2/HERC1/CA12/RORA/WDR72/ARPP19/MYO5A/CYP19A1/TNFAIP8L3/10
	16606724	28413506	10	ENSBTAG00000052439/ENSBTAG00000025814/ENSBTAG00000006708/ENSBTAG00000004990	10/TMEM202/ARIH1/NEO1
	18086840	19720923	10	ENSBTAG00000025814/ENSBTAG00000006708	TMEM202/ARIH1
	18115876	20229329	10	ENSBTAG00000025814/ENSBTAG00000006708/ENSBTAG00000004990	TMEM202/ARIH1/NEO1
	19195344	37174723	10	ENSBTAG00000001671/ENSBTAG00000001675/ENSBTAG00000001694/ENSBTAG00000025814/ENSBTAG00000006708/ENSBTAG00000004990	RTF1/ITPKA/TYRO3/TMEM202/ARIH1/NEO1
	19924813	22339193	10	ENSBTAG00000004990	NEO1
	24301480	55904933	10	ENSBTAG00000001671/ENSBTAG00000001675/ENSBTAG00000001694/ENSBTAG00000007638/ENSBTAG00000011037/ENSBTAG00000053677/ENSBTAG00000019390/ENSBTAG00000015904	RTF1/ITPKA/TYRO3/PIF1/RBPMS2/HERC1/CA12/RORA
	26406685	57665215	10	ENSBTAG00000001671/ENSBTAG00000001675/ENSBTAG00000001694/ENSBTAG00000007638/ENSBTAG00000011037/ENSBTAG00000053677/ENSBTAG00000019390/ENSBTAG00000015904/ENSBTAG00000021876	RTF1/ITPKA/TYRO3/PIF1/RBPMS2/HERC1/CA12/RORA/WDR72
	29293756	59135384	10	ENSBTAG00000001671/ENSBTAG00000001675/ENSBTAG00000001694/ENSBTAG00000007638/ENSBTAG00000011037/ENSBTAG00000053677/ENSBTAG00000019390/ENSBTAG00000015904/ENSBTAG00000021876/ENSBTAG00000011022/ENSBTAG00000006489/ENSBTAG00000014890	RTF1/ITPKA/TYRO3/PIF1/RBPMS2/HERC1/CA12/RORA/WDR72/ARPP19/MYO5A/CYP19A1
	29293756	104253580	10	ENSBTAG00000052724/ENSBTAG00000014189/ENSBTAG00000008713/ENSBTAG00000001671/ENSBTAG00000001675/ENSBTAG00000001694/ENSBTAG00000025644/ENSBTAG00000007638/ENSBTAG00000011037/ENSBTAG00000053677/ENSBTAG00000019390/ENSBTAG00000015904/ENSBTAG00000021876/ENSBTAG00000011022/ENSBTAG00000006489/ENSBTAG00000014890/ENSBTAG00000010472/ENSBTAG00000049100	10/RGS6/DCAF4/RTF1/ITPKA/TYRO3/CALM1/PIF1/RBPMS2/HERC1/CA12/RORA/WDR72/ARPP19/MYO5A/CYP19A1/TNFAIP8L3/10
	29469549	63825243	10	ENSBTAG00000001671/ENSBTAG00000001675/ENSBTAG00000001694/ENSBTAG00000007638/ENSBTAG00000011037/ENSBTAG00000053677/ENSBTAG00000019390/ENSBTAG00000015904/ENSBTAG00000021876/ENSBTAG00000011022/ENSBTAG00000006489/ENSBTAG00000014890/ENSBTAG00000010472	RTF1/ITPKA/TYRO3/PIF1/RBPMS2/HERC1/CA12/RORA/WDR72/ARPP19/MYO5A/CYP19A1/TNFAIP8L3
	33343859	46345098	10	ENSBTAG00000001671/ENSBTAG00000001675/ENSBTAG00000001694/ENSBTAG00000007638/ENSBTAG00000011037/ENSBTAG00000053677	RTF1/ITPKA/TYRO3/PIF1/RBPMS2/HERC1
	34383915	68993955	10	ENSBTAG00000001671/ENSBTAG00000001675/ENSBTAG00000001694/ENSBTAG00000007638/ENSBTAG00000011037/ENSBTAG00000053677/ENSBTAG00000019390/ENSBTAG00000015904/ENSBTAG00000021876/ENSBTAG00000011022/ENSBTAG00000006489/ENSBTAG00000014890/ENSBTAG00000010472/ENSBTAG00000049100	RTF1/ITPKA/TYRO3/PIF1/RBPMS2/HERC1/CA12/RORA/WDR72/ARPP19/MYO5A/CYP19A1/TNFAIP8L3/10
	34998931	58076494	10	ENSBTAG00000001671/ENSBTAG00000001675/ENSBTAG00000001694/ENSBTAG00000007638/ENSBTAG00000011037/ENSBTAG00000053677/ENSBTAG00000019390/ENSBTAG00000015904/ENSBTAG00000021876/ENSBTAG00000011022/ENSBTAG00000006489	RTF1/ITPKA/TYRO3/PIF1/RBPMS2/HERC1/CA12/RORA/WDR72/ARPP19/MYO5A
	35479280	87139659	10	ENSBTAG00000052724/ENSBTAG00000014189/ENSBTAG00000008713/ENSBTAG00000001671/ENSBTAG00000001675/ENSBTAG00000001694/ENSBTAG00000007638/ENSBTAG00000011037/ENSBTAG00000053677/ENSBTAG00000019390/ENSBTAG00000015904/ENSBTAG00000021876/ENSBTAG00000011022/ENSBTAG00000006489/ENSBTAG00000014890/ENSBTAG00000010472/ENSBTAG00000049100	10/RGS6/DCAF4/RTF1/ITPKA/TYRO3/PIF1/RBPMS2/HERC1/CA12/RORA/WDR72/ARPP19/MYO5A/CYP19A1/TNFAIP8L3/10
	36601917	39166231	10	ENSBTAG00000001671/ENSBTAG00000001675/ENSBTAG00000001694	RTF1/ITPKA/TYRO3
	37830642	77091346	10	ENSBTAG00000007638/ENSBTAG00000011037/ENSBTAG00000053677/ENSBTAG00000019390/ENSBTAG00000015904/ENSBTAG00000021876/ENSBTAG00000011022/ENSBTAG00000006489/ENSBTAG00000014890/ENSBTAG00000010472/ENSBTAG00000049100	PIF1/RBPMS2/HERC1/CA12/RORA/WDR72/ARPP19/MYO5A/CYP19A1/TNFAIP8L3/10
	37830642	89081278	10	ENSBTAG00000052724/ENSBTAG00000014189/ENSBTAG00000008713/ENSBTAG00000007638/ENSBTAG00000011037/ENSBTAG00000053677/ENSBTAG00000019390/ENSBTAG00000015904/ENSBTAG00000021876/ENSBTAG00000011022/ENSBTAG00000006489/ENSBTAG00000014890/ENSBTAG00000010472/ENSBTAG00000049100	10/RGS6/DCAF4/PIF1/RBPMS2/HERC1/CA12/RORA/WDR72/ARPP19/MYO5A/CYP19A1/TNFAIP8L3/10
	37870339	46450370	10	ENSBTAG00000007638/ENSBTAG00000011037/ENSBTAG00000053677	PIF1/RBPMS2/HERC1
	42613344	102672107	10	ENSBTAG00000052724/ENSBTAG00000014189/ENSBTAG00000008713/ENSBTAG00000025644/ENSBTAG00000007638/ENSBTAG00000011037/ENSBTAG00000053677/ENSBTAG00000019390/ENSBTAG00000015904/ENSBTAG00000021876/ENSBTAG00000011022/ENSBTAG00000006489/ENSBTAG00000014890/ENSBTAG00000010472/ENSBTAG00000049100	10/RGS6/DCAF4/CALM1/PIF1/RBPMS2/HERC1/CA12/RORA/WDR72/ARPP19/MYO5A/CYP19A1/TNFAIP8L3/10
	44255052	50789886	10	ENSBTAG00000007638/ENSBTAG00000011037/ENSBTAG00000053677/ENSBTAG00000019390/ENSBTAG00000015904	PIF1/RBPMS2/HERC1/CA12/RORA
	44601357	45941254	10	ENSBTAG00000007638/ENSBTAG00000011037	PIF1/RBPMS2
	44821159	47091630	10	ENSBTAG00000007638/ENSBTAG00000011037/ENSBTAG00000053677/ENSBTAG00000019390	PIF1/RBPMS2/HERC1/CA12
	45323831	47197199	10	ENSBTAG00000011037/ENSBTAG00000053677/ENSBTAG00000019390	RBPMS2/HERC1/CA12
	46548679	49319621	10	ENSBTAG00000019390/ENSBTAG00000015904	CA12/RORA
	46729918	57065593	10	ENSBTAG00000019390/ENSBTAG00000015904/ENSBTAG00000021876	CA12/RORA/WDR72
	46729918	88478287	10	ENSBTAG00000052724/ENSBTAG00000014189/ENSBTAG00000008713/ENSBTAG00000019390/ENSBTAG00000015904/ENSBTAG00000021876/ENSBTAG00000011022/ENSBTAG00000006489/ENSBTAG00000014890/ENSBTAG00000010472/ENSBTAG00000049100	10/RGS6/DCAF4/CA12/RORA/WDR72/ARPP19/MYO5A/CYP19A1/TNFAIP8L3/10
	48541387	80910121	10	ENSBTAG00000015904/ENSBTAG00000021876/ENSBTAG00000011022/ENSBTAG00000006489/ENSBTAG00000014890/ENSBTAG00000010472/ENSBTAG00000049100	RORA/WDR72/ARPP19/MYO5A/CYP19A1/TNFAIP8L3/10
	48581210	103773205	10	ENSBTAG00000052724/ENSBTAG00000014189/ENSBTAG00000008713/ENSBTAG00000025644/ENSBTAG00000015904/ENSBTAG00000021876/ENSBTAG00000011022/ENSBTAG00000006489/ENSBTAG00000014890/ENSBTAG00000010472/ENSBTAG00000049100	10/RGS6/DCAF4/CALM1/RORA/WDR72/ARPP19/MYO5A/CYP19A1/TNFAIP8L3/10
	48684692	55323184	10	ENSBTAG00000015904	RORA
	48837583	85944517	10	ENSBTAG00000052724/ENSBTAG00000014189/ENSBTAG00000008713/ENSBTAG00000015904/ENSBTAG00000021876/ENSBTAG00000011022/ENSBTAG00000006489/ENSBTAG00000014890/ENSBTAG00000010472/ENSBTAG00000049100	10/RGS6/DCAF4/RORA/WDR72/ARPP19/MYO5A/CYP19A1/TNFAIP8L3/10
	52884624	56946611	10	ENSBTAG00000021876	WDR72
	52884624	89093810	10	ENSBTAG00000052724/ENSBTAG00000014189/ENSBTAG00000008713/ENSBTAG00000021876/ENSBTAG00000011022/ENSBTAG00000006489/ENSBTAG00000014890/ENSBTAG00000010472/ENSBTAG00000049100	10/RGS6/DCAF4/WDR72/ARPP19/MYO5A/CYP19A1/TNFAIP8L3/10
	54082665	71577782	10	ENSBTAG00000021876/ENSBTAG00000011022/ENSBTAG00000006489/ENSBTAG00000014890/ENSBTAG00000010472/ENSBTAG00000049100	WDR72/ARPP19/MYO5A/CYP19A1/TNFAIP8L3/10
	55719332	60168183	10	ENSBTAG00000021876/ENSBTAG00000011022/ENSBTAG00000006489/ENSBTAG00000014890/ENSBTAG00000010472	WDR72/ARPP19/MYO5A/CYP19A1/TNFAIP8L3
	55751369	59036433	10	ENSBTAG00000021876/ENSBTAG00000011022/ENSBTAG00000006489	WDR72/ARPP19/MYO5A
	57786593	68916657	10	ENSBTAG00000011022/ENSBTAG00000006489/ENSBTAG00000014890/ENSBTAG00000010472/ENSBTAG00000049100	ARPP19/MYO5A/CYP19A1/TNFAIP8L3/10
	57832918	60194057	10	ENSBTAG00000011022/ENSBTAG00000006489/ENSBTAG00000014890/ENSBTAG00000010472	ARPP19/MYO5A/CYP19A1/TNFAIP8L3
	57853742	102887596	10	ENSBTAG00000052724/ENSBTAG00000014189/ENSBTAG00000008713/ENSBTAG00000025644/ENSBTAG00000006489/ENSBTAG00000014890/ENSBTAG00000010472/ENSBTAG00000049100	10/RGS6/DCAF4/CALM1/MYO5A/CYP19A1/TNFAIP8L3/10
	58631450	90178047	10	ENSBTAG00000052724/ENSBTAG00000014189/ENSBTAG00000008713/ENSBTAG00000014890/ENSBTAG00000010472/ENSBTAG00000049100	10/RGS6/DCAF4/CYP19A1/TNFAIP8L3/10
	58745681	60751612	10	ENSBTAG00000014890/ENSBTAG00000010472	CYP19A1/TNFAIP8L3
	63947314	102813194	10	ENSBTAG00000052724/ENSBTAG00000014189/ENSBTAG00000008713/ENSBTAG00000025644/ENSBTAG00000049100	10/RGS6/DCAF4/CALM1/10
	66022910	68667898	10	ENSBTAG00000049100
	71835260	102813194	10	ENSBTAG00000052724/ENSBTAG00000014189/ENSBTAG00000008713/ENSBTAG00000025644	10/RGS6/DCAF4/CALM1
	83613368	85910292	10	ENSBTAG00000014189/ENSBTAG00000008713	RGS6/DCAF4
	83843832	103075927	10	ENSBTAG00000014189/ENSBTAG00000008713/ENSBTAG00000025644	RGS6/DCAF4/CALM1
	84424782	86214669	10	ENSBTAG00000008713	DCAF4
	101916247	104215086	10	ENSBTAG00000025644	CALM1
	39943	22201316	11	ENSBTAG00000017955/ENSBTAG00000011553/ENSBTAG00000048909/ENSBTAG00000019697/ENSBTAG00000008006/ENSBTAG00000052276/ENSBTAG00000009020	KCNIP3/FAHD2A/11/NPAS2/RASGRP3/11/CRIM1
	39943	40219221	11	ENSBTAG00000020614/ENSBTAG00000017955/ENSBTAG00000011553/ENSBTAG00000048909/ENSBTAG00000019697/ENSBTAG00000008006/ENSBTAG00000052276/ENSBTAG00000009020	PRKCE/KCNIP3/FAHD2A/11/NPAS2/RASGRP3/11/CRIM1
	39943	50018838	11	ENSBTAG00000020614/ENSBTAG00000049811/ENSBTAG00000005432/ENSBTAG00000017955/ENSBTAG00000011553/ENSBTAG00000048909/ENSBTAG00000019697/ENSBTAG00000008006/ENSBTAG00000052276/ENSBTAG00000009020	PRKCE/11/CAPG/KCNIP3/FAHD2A/11/NPAS2/RASGRP3/11/CRIM1
	39943	83972216	11	ENSBTAG00000020614/ENSBTAG00000049811/ENSBTAG00000005432/ENSBTAG00000043609/ENSBTAG00000052860/ENSBTAG00000052074/ENSBTAG00000018401/ENSBTAG00000050333/ENSBTAG00000007379/ENSBTAG00000017955/ENSBTAG00000011553/ENSBTAG00000048909/ENSBTAG00000019697/ENSBTAG00000052545/ENSBTAG00000008006/ENSBTAG00000052276/ENSBTAG00000009020	PRKCE/11/CAPG/5S_rRNA/11/11/APLF/PROKR1/ALK/KCNIP3/FAHD2A/11/NPAS2/bta-mir-2285af-1/RASGRP3/11/CRIM1
	68565	107246475	11	ENSBTAG00000020614/ENSBTAG00000008160/ENSBTAG00000037793/ENSBTAG00000049811/ENSBTAG00000006948/ENSBTAG00000006957/ENSBTAG00000023885/ENSBTAG00000012844/ENSBTAG00000001933/ENSBTAG00000052455/ENSBTAG00000002936/ENSBTAG00000005432/ENSBTAG00000047998/ENSBTAG00000043609/ENSBTAG00000052860/ENSBTAG00000052074/ENSBTAG00000018401/ENSBTAG00000050333/ENSBTAG00000007882/ENSBTAG00000007379/ENSBTAG00000017955/…	PRKCE/MBOAT2/11/11/GARNL3/SLC2A8/ZNF79/LRSAM1/PTPA/bta-mir-12056/PRRX2/CAPG/COL5A1/5S_rRNA/11/11/APLF/PROKR1/CACNA1B/ALK/KCNIP3/FAHD2A/11/NPAS2/bta-mir-2285af-1/RASGRP3/11/CRIM1
	68565	5930204	11	ENSBTAG00000017955/ENSBTAG00000011553/ENSBTAG00000048909/ENSBTAG00000019697	KCNIP3/FAHD2A/11/NPAS2
	68565	45584828	11	ENSBTAG00000020614/ENSBTAG00000049811/ENSBTAG00000017955/ENSBTAG00000011553/ENSBTAG00000048909/ENSBTAG00000019697/ENSBTAG00000008006/ENSBTAG00000052276/ENSBTAG00000009020	PRKCE/11/KCNIP3/FAHD2A/11/NPAS2/RASGRP3/11/CRIM1
	68565	17143826	11	ENSBTAG00000017955/ENSBTAG00000011553/ENSBTAG00000048909/ENSBTAG00000019697/ENSBTAG00000008006/ENSBTAG00000052276	KCNIP3/FAHD2A/11/NPAS2/RASGRP3/11
	68565	76354822	11	ENSBTAG00000020614/ENSBTAG00000049811/ENSBTAG00000005432/ENSBTAG00000043609/ENSBTAG00000052860/ENSBTAG00000052074/ENSBTAG00000018401/ENSBTAG00000050333/ENSBTAG00000007379/ENSBTAG00000017955/ENSBTAG00000011553/ENSBTAG00000048909/ENSBTAG00000019697/ENSBTAG00000008006/ENSBTAG00000052276/ENSBTAG00000009020	PRKCE/11/CAPG/5S_rRNA/11/11/APLF/PROKR1/ALK/KCNIP3/FAHD2A/11/NPAS2/RASGRP3/11/CRIM1
	740136	2545204	11	ENSBTAG00000017955/ENSBTAG00000011553	KCNIP3/FAHD2A
	854379	4525511	11	ENSBTAG00000017955/ENSBTAG00000011553/ENSBTAG00000048909	KCNIP3/FAHD2A/11
	2153418	3192673	11	ENSBTAG00000011553/ENSBTAG00000048909	FAHD2A/11
	2153418	22201316	11	ENSBTAG00000011553/ENSBTAG00000048909/ENSBTAG00000019697/ENSBTAG00000008006/ENSBTAG00000052276/ENSBTAG00000009020	FAHD2A/11/NPAS2/RASGRP3/11/CRIM1
	2153418	83885730	11	ENSBTAG00000020614/ENSBTAG00000049811/ENSBTAG00000005432/ENSBTAG00000043609/ENSBTAG00000052860/ENSBTAG00000052074/ENSBTAG00000018401/ENSBTAG00000050333/ENSBTAG00000007379/ENSBTAG00000011553/ENSBTAG00000048909/ENSBTAG00000019697/ENSBTAG00000052545/ENSBTAG00000008006/ENSBTAG00000052276/ENSBTAG00000009020	PRKCE/11/CAPG/5S_rRNA/11/11/APLF/PROKR1/ALK/FAHD2A/11/NPAS2/bta-mir-2285af-1/RASGRP3/11/CRIM1
	3268002	22201316	11	ENSBTAG00000019697/ENSBTAG00000008006/ENSBTAG00000052276/ENSBTAG00000009020	NPAS2/RASGRP3/11/CRIM1
	4875412	16954791	11	ENSBTAG00000019697/ENSBTAG00000008006/ENSBTAG00000052276	NPAS2/RASGRP3/11
	4918860	9473158	11	ENSBTAG00000019697	NPAS2
	8042280	20994163	11	ENSBTAG00000008006/ENSBTAG00000052276/ENSBTAG00000009020	RASGRP3/11/CRIM1
	8763389	18446256	11	ENSBTAG00000008006/ENSBTAG00000052276	RASGRP3/11
	17617527	20579115	11	ENSBTAG00000009020	CRIM1
	19971032	50170608	11	ENSBTAG00000020614/ENSBTAG00000049811/ENSBTAG00000005432	PRKCE/11/CAPG
	22028143	41608506	11	ENSBTAG00000020614/ENSBTAG00000049811	PRKCE/11
	22262537	83737492	11	ENSBTAG00000020614/ENSBTAG00000049811/ENSBTAG00000005432/ENSBTAG00000043609/ENSBTAG00000052860/ENSBTAG00000052074/ENSBTAG00000018401/ENSBTAG00000050333/ENSBTAG00000007379/ENSBTAG00000052545	PRKCE/11/CAPG/5S_rRNA/11/11/APLF/PROKR1/ALK/bta-mir-2285af-1
	24102073	28333085	11	ENSBTAG00000020614	PRKCE
	26235778	66258285	11	ENSBTAG00000020614/ENSBTAG00000049811/ENSBTAG00000005432/ENSBTAG00000043609/ENSBTAG00000052860/ENSBTAG00000052074	PRKCE/11/CAPG/5S_rRNA/11/11
	26235778	67498111	11	ENSBTAG00000020614/ENSBTAG00000049811/ENSBTAG00000005432/ENSBTAG00000043609/ENSBTAG00000052860/ENSBTAG00000052074/ENSBTAG00000018401/ENSBTAG00000050333	PRKCE/11/CAPG/5S_rRNA/11/11/APLF/PROKR1
	26235778	76861767	11	ENSBTAG00000020614/ENSBTAG00000049811/ENSBTAG00000005432/ENSBTAG00000043609/ENSBTAG00000052860/ENSBTAG00000052074/ENSBTAG00000018401/ENSBTAG00000050333/ENSBTAG00000007379	PRKCE/11/CAPG/5S_rRNA/11/11/APLF/PROKR1/ALK
	28741505	62847615	11	ENSBTAG00000049811/ENSBTAG00000005432	11/CAPG
	28741505	83822684	11	ENSBTAG00000049811/ENSBTAG00000005432/ENSBTAG00000043609/ENSBTAG00000052860/ENSBTAG00000052074/ENSBTAG00000018401/ENSBTAG00000050333/ENSBTAG00000007379/ENSBTAG00000052545	11/CAPG/5S_rRNA/11/11/APLF/PROKR1/ALK/bta-mir-2285af-1
	46143526	72973534	11	ENSBTAG00000005432/ENSBTAG00000043609/ENSBTAG00000052860/ENSBTAG00000052074/ENSBTAG00000018401/ENSBTAG00000050333/ENSBTAG00000007379	CAPG/5S_rRNA/11/11/APLF/PROKR1/ALK
	47738097	50264058	11	ENSBTAG00000005432	CAPG
	50440128	83737492	11	ENSBTAG00000043609/ENSBTAG00000052860/ENSBTAG00000052074/ENSBTAG00000018401/ENSBTAG00000050333/ENSBTAG00000007379/ENSBTAG00000052545	5S_rRNA/11/11/APLF/PROKR1/ALK/bta-mir-2285af-1
	53481782	71352399	11	ENSBTAG00000043609/ENSBTAG00000052860/ENSBTAG00000052074/ENSBTAG00000018401/ENSBTAG00000050333/ENSBTAG00000007379	5S_rRNA/11/11/APLF/PROKR1/ALK
	62537588	66144244	11	ENSBTAG00000043609/ENSBTAG00000052860/ENSBTAG00000052074	5S_rRNA/11/11
	65532088	68972281	11	ENSBTAG00000052860/ENSBTAG00000052074/ENSBTAG00000018401/ENSBTAG00000050333	11/11/APLF/PROKR1
	65861842	71305272	11	ENSBTAG00000052860/ENSBTAG00000052074/ENSBTAG00000018401/ENSBTAG00000050333/ENSBTAG00000007379	11/11/APLF/PROKR1/ALK
	66450428	83737492	11	ENSBTAG00000018401/ENSBTAG00000050333/ENSBTAG00000007379/ENSBTAG00000052545	APLF/PROKR1/ALK/bta-mir-2285af-1
	66602594	69478949	11	ENSBTAG00000018401/ENSBTAG00000050333	APLF/PROKR1
	66789317	75564305	11	ENSBTAG00000018401/ENSBTAG00000050333/ENSBTAG00000007379	APLF/PROKR1/ALK
	66974370	70286019	11	ENSBTAG00000050333/ENSBTAG00000007379	PROKR1/ALK
	67016791	68654860	11	ENSBTAG00000050333	PROKR1
	67525323	73753220	11	ENSBTAG00000007379	ALK
	67577210	83972216	11	ENSBTAG00000007379/ENSBTAG00000052545	ALK/bta-mir-2285af-1
	77051512	83737492	11	ENSBTAG00000052545	bta-mir-2285af-1
	85248437	88858859	11	ENSBTAG00000008160	MBOAT2
	85426088	107153765	11	ENSBTAG00000008160/ENSBTAG00000037793/ENSBTAG00000006948/ENSBTAG00000006957/ENSBTAG00000023885/ENSBTAG00000012844/ENSBTAG00000001933/ENSBTAG00000052455/ENSBTAG00000002936/ENSBTAG00000047998/ENSBTAG00000007882	MBOAT2/11/GARNL3/SLC2A8/ZNF79/LRSAM1/PTPA/bta-mir-12056/PRRX2/COL5A1/CACNA1B
	86006314	105778702	11	ENSBTAG00000008160/ENSBTAG00000037793/ENSBTAG00000006948/ENSBTAG00000006957/ENSBTAG00000023885/ENSBTAG00000012844/ENSBTAG00000001933/ENSBTAG00000052455/ENSBTAG00000002936/ENSBTAG00000047998	MBOAT2/11/GARNL3/SLC2A8/ZNF79/LRSAM1/PTPA/bta-mir-12056/PRRX2/COL5A1
	86053616	100858404	11	ENSBTAG00000008160/ENSBTAG00000037793/ENSBTAG00000006948/ENSBTAG00000006957/ENSBTAG00000023885/ENSBTAG00000012844/ENSBTAG00000001933/ENSBTAG00000052455/ENSBTAG00000002936	MBOAT2/11/GARNL3/SLC2A8/ZNF79/LRSAM1/PTPA/bta-mir-12056/PRRX2
	87257595	90076342	11	ENSBTAG00000008160/ENSBTAG00000037793	MBOAT2/11
	87515459	99228755	11	ENSBTAG00000008160/ENSBTAG00000037793/ENSBTAG00000006948/ENSBTAG00000006957/ENSBTAG00000023885/ENSBTAG00000012844	MBOAT2/11/GARNL3/SLC2A8/ZNF79/LRSAM1
	88824495	107282960	11	ENSBTAG00000037793/ENSBTAG00000006948/ENSBTAG00000006957/ENSBTAG00000023885/ENSBTAG00000012844/ENSBTAG00000001933/ENSBTAG00000052455/ENSBTAG00000002936/ENSBTAG00000047998/ENSBTAG00000007882	11/GARNL3/SLC2A8/ZNF79/LRSAM1/PTPA/bta-mir-12056/PRRX2/COL5A1/CACNA1B
	88995785	103363410	11	ENSBTAG00000037793/ENSBTAG00000006948/ENSBTAG00000006957/ENSBTAG00000023885/ENSBTAG00000012844/ENSBTAG00000001933/ENSBTAG00000052455/ENSBTAG00000002936	11/GARNL3/SLC2A8/ZNF79/LRSAM1/PTPA/bta-mir-12056/PRRX2
	91068648	107246475	11	ENSBTAG00000006948/ENSBTAG00000006957/ENSBTAG00000023885/ENSBTAG00000012844/ENSBTAG00000001933/ENSBTAG00000052455/ENSBTAG00000002936/ENSBTAG00000047998/ENSBTAG00000007882	GARNL3/SLC2A8/ZNF79/LRSAM1/PTPA/bta-mir-12056/PRRX2/COL5A1/CACNA1B
	97289960	99774304	11	ENSBTAG00000006948/ENSBTAG00000006957/ENSBTAG00000023885/ENSBTAG00000012844/ENSBTAG00000001933/ENSBTAG00000052455	GARNL3/SLC2A8/ZNF79/LRSAM1/PTPA/bta-mir-12056
	97789423	100152978	11	ENSBTAG00000006948/ENSBTAG00000006957/ENSBTAG00000023885/ENSBTAG00000012844/ENSBTAG00000001933/ENSBTAG00000052455/ENSBTAG00000002936	GARNL3/SLC2A8/ZNF79/LRSAM1/PTPA/bta-mir-12056/PRRX2
	98164828	100283991	11	ENSBTAG00000023885/ENSBTAG00000012844/ENSBTAG00000001933/ENSBTAG00000052455/ENSBTAG00000002936	ZNF79/LRSAM1/PTPA/bta-mir-12056/PRRX2
	98186362	100629266	11	ENSBTAG00000012844/ENSBTAG00000001933/ENSBTAG00000052455/ENSBTAG00000002936	LRSAM1/PTPA/bta-mir-12056/PRRX2
	98219856	100472048	11	ENSBTAG00000001933/ENSBTAG00000052455/ENSBTAG00000002936	PTPA/bta-mir-12056/PRRX2
	99797276	104706709	11	ENSBTAG00000002936	PRRX2
	100072287	107153765	11	ENSBTAG00000002936/ENSBTAG00000047998/ENSBTAG00000007882	PRRX2/COL5A1/CACNA1B
	101326772	107246475	11	ENSBTAG00000047998/ENSBTAG00000007882	COL5A1/CACNA1B
	103534103	106019172	11	ENSBTAG00000047998	COL5A1
	106019172	107282960	11	ENSBTAG00000007882	CACNA1B
	147119	15251837	12	ENSBTAG00000034885	RGCC
	3440244	21315343	12	ENSBTAG00000019863/ENSBTAG00000034885/ENSBTAG00000018580	CCDC70/RGCC/CBY2
	4889853	17265269	12	ENSBTAG00000034885/ENSBTAG00000018580	RGCC/CBY2
	9363874	30765426	12	ENSBTAG00000019863/ENSBTAG00000018103/ENSBTAG00000034885/ENSBTAG00000018580	CCDC70/HMGB1/RGCC/CBY2
	10535044	58461348	12	ENSBTAG00000019863/ENSBTAG00000018103/ENSBTAG00000005318/ENSBTAG00000025428/ENSBTAG00000032878/ENSBTAG00000034885/ENSBTAG00000018580	CCDC70/HMGB1/RNF6/12/12/RGCC/CBY2
	13120339	25552044	12	ENSBTAG00000019863/ENSBTAG00000018580	CCDC70/CBY2
	15441597	18195634	12	ENSBTAG00000018580	CBY2
	16580958	70164800	12	ENSBTAG00000019863/ENSBTAG00000018103/ENSBTAG00000005318/ENSBTAG00000025428/ENSBTAG00000032878/ENSBTAG00000008708	CCDC70/HMGB1/RNF6/12/12/GPC5
	18701196	21790687	12	ENSBTAG00000019863	CCDC70
	25687734	64536196	12	ENSBTAG00000018103/ENSBTAG00000005318/ENSBTAG00000025428/ENSBTAG00000032878	HMGB1/RNF6/12/12
	25775588	31639399	12	ENSBTAG00000018103	HMGB1
	26773494	70164800	12	ENSBTAG00000018103/ENSBTAG00000005318/ENSBTAG00000025428/ENSBTAG00000032878/ENSBTAG00000008708	HMGB1/RNF6/12/12/GPC5
	28667242	42161347	12	ENSBTAG00000018103/ENSBTAG00000005318/ENSBTAG00000025428	HMGB1/RNF6/12
	30808992	72405534	12	ENSBTAG00000005318/ENSBTAG00000025428/ENSBTAG00000032878/ENSBTAG00000008708	RNF6/12/12/GPC5
	30889096	81784137	12	ENSBTAG00000005318/ENSBTAG00000025428/ENSBTAG00000032878/ENSBTAG00000008708/ENSBTAG00000044027	RNF6/12/12/GPC5/ITGBL1
	32368787	35217268	12	ENSBTAG00000005318/ENSBTAG00000025428	RNF6/12
	32740176	64002872	12	ENSBTAG00000005318/ENSBTAG00000025428/ENSBTAG00000032878	RNF6/12/12
	39249662	70812571	12	ENSBTAG00000032878/ENSBTAG00000008708	12/GPC5
	40558862	91131021	12	ENSBTAG00000032878/ENSBTAG00000008708/ENSBTAG00000044027/ENSBTAG00000048434/ENSBTAG00000050193	12/GPC5/ITGBL1/12/12
	56520664	67951346	12	ENSBTAG00000008708	GPC5
	64663790	79879323	12	ENSBTAG00000008708/ENSBTAG00000044027	GPC5/ITGBL1
	77695384	86535900	12	ENSBTAG00000044027/ENSBTAG00000048434/ENSBTAG00000050193	ITGBL1/12/12
	77816640	81540197	12	ENSBTAG00000044027	ITGBL1
	33877	10695973	13	ENSBTAG00000008338/ENSBTAG00000034441	PLCB1/MACROD2
	33877	13961660	13	ENSBTAG00000019488/ENSBTAG00000008338/ENSBTAG00000034441	USP6NL/PLCB1/MACROD2
	33877	38720082	13	ENSBTAG00000019488/ENSBTAG00000002123/ENSBTAG00000050858/ENSBTAG00000008338/ENSBTAG00000034441	USP6NL/MYO3A/13/PLCB1/MACROD2
	33877	46181219	13	ENSBTAG00000019488/ENSBTAG00000002123/ENSBTAG00000050858/ENSBTAG00000009291/ENSBTAG00000051664/ENSBTAG00000008338/ENSBTAG00000034441	USP6NL/MYO3A/13/CFAP61/bta-mir-2285ax-1/PLCB1/MACROD2
	33877	72842894	13	ENSBTAG00000019488/ENSBTAG00000002123/ENSBTAG00000050858/ENSBTAG00000014046/ENSBTAG00000000653/ENSBTAG00000000660/ENSBTAG00000044690/ENSBTAG00000004039/ENSBTAG00000009291/ENSBTAG00000051664/ENSBTAG00000008338/ENSBTAG00000034441	USP6NL/MYO3A/13/BPI/PPP1R16B/FAM83D/13/DHX35/CFAP61/bta-mir-2285ax-1/PLCB1/MACROD2
	313308	7564399	13	ENSBTAG00000008338	PLCB1
	1799876	57341541	13	ENSBTAG00000019488/ENSBTAG00000002123/ENSBTAG00000050858/ENSBTAG00000009291/ENSBTAG00000051664/ENSBTAG00000034441	USP6NL/MYO3A/13/CFAP61/bta-mir-2285ax-1/MACROD2
	2492972	13204645	13	ENSBTAG00000019488/ENSBTAG00000034441	USP6NL/MACROD2
	9139641	10255498	13	ENSBTAG00000034441	MACROD2
	10194150	15899318	13	ENSBTAG00000019488	USP6NL
	10519188	52860285	13	ENSBTAG00000019488/ENSBTAG00000002123/ENSBTAG00000050858/ENSBTAG00000009291/ENSBTAG00000051664	USP6NL/MYO3A/13/CFAP61/bta-mir-2285ax-1
	11827726	80428308	13	ENSBTAG00000019488/ENSBTAG00000002123/ENSBTAG00000050858/ENSBTAG00000014046/ENSBTAG00000000653/ENSBTAG00000000660/ENSBTAG00000044690/ENSBTAG00000004039/ENSBTAG00000009291/ENSBTAG00000051664/ENSBTAG00000013336	USP6NL/MYO3A/13/BPI/PPP1R16B/FAM83D/13/DHX35/CFAP61/bta-mir-2285ax-1/EYA2
	13706672	54742445	13	ENSBTAG00000002123/ENSBTAG00000050858/ENSBTAG00000009291/ENSBTAG00000051664	MYO3A/13/CFAP61/bta-mir-2285ax-1
	21705506	71802423	13	ENSBTAG00000002123/ENSBTAG00000050858/ENSBTAG00000014046/ENSBTAG00000000653/ENSBTAG00000000660/ENSBTAG00000044690/ENSBTAG00000004039/ENSBTAG00000009291/ENSBTAG00000051664	MYO3A/13/BPI/PPP1R16B/FAM83D/13/DHX35/CFAP61/bta-mir-2285ax-1
	21891617	34725093	13	ENSBTAG00000002123/ENSBTAG00000050858	MYO3A/13
	24269841	76330479	13	ENSBTAG00000002123/ENSBTAG00000050858/ENSBTAG00000014046/ENSBTAG00000000653/ENSBTAG00000000660/ENSBTAG00000044690/ENSBTAG00000004039/ENSBTAG00000009291/ENSBTAG00000051664/ENSBTAG00000013336	MYO3A/13/BPI/PPP1R16B/FAM83D/13/DHX35/CFAP61/bta-mir-2285ax-1/EYA2
	24993156	27430120	13	ENSBTAG00000002123	MYO3A
	33652701	59756132	13	ENSBTAG00000050858/ENSBTAG00000009291/ENSBTAG00000051664	13/CFAP61/bta-mir-2285ax-1
	38402690	40525851	13	ENSBTAG00000009291/ENSBTAG00000051664	CFAP61/bta-mir-2285ax-1
	39826900	43524316	13	ENSBTAG00000009291	CFAP61
	56532232	82621346	13	ENSBTAG00000014046/ENSBTAG00000000653/ENSBTAG00000000660/ENSBTAG00000044690/ENSBTAG00000004039/ENSBTAG00000013336	BPI/PPP1R16B/FAM83D/13/DHX35/EYA2
	59250696	67616199	13	ENSBTAG00000014046/ENSBTAG00000000653	BPI/PPP1R16B
	61743750	68324133	13	ENSBTAG00000014046/ENSBTAG00000000653/ENSBTAG00000000660/ENSBTAG00000044690/ENSBTAG00000004039	BPI/PPP1R16B/FAM83D/13/DHX35
	63907611	67264571	13	ENSBTAG00000014046	BPI
	67698840	72197105	13	ENSBTAG00000000653/ENSBTAG00000000660/ENSBTAG00000044690/ENSBTAG00000004039	PPP1R16B/FAM83D/13/DHX35
	75310875	77319144	13	ENSBTAG00000013336	EYA2
	74984	23592005	14	ENSBTAG00000017138/ENSBTAG00000010548/ENSBTAG00000014600/ENSBTAG00000005898/ENSBTAG00000020034	TMEM71/LRRC6/ADCY8/TGS1/LYN
	1435005	31060310	14	ENSBTAG00000017138/ENSBTAG00000010548/ENSBTAG00000014600/ENSBTAG00000005898/ENSBTAG00000020034/ENSBTAG00000050550	TMEM71/LRRC6/ADCY8/TGS1/LYN/FAM110B
	7428315	10118287	14	ENSBTAG00000017138/ENSBTAG00000010548/ENSBTAG00000014600	TMEM71/LRRC6/ADCY8
	7612098	9542083	14	ENSBTAG00000017138/ENSBTAG00000010548	TMEM71/LRRC6
	8621379	10549180	14	ENSBTAG00000010548/ENSBTAG00000014600	LRRC6/ADCY8
	8698150	24824037	14	ENSBTAG00000014600/ENSBTAG00000005898/ENSBTAG00000020034/ENSBTAG00000050550	ADCY8/TGS1/LYN/FAM110B
	8951120	11079567	14	ENSBTAG00000014600	ADCY8
	9854232	23592005	14	ENSBTAG00000014600/ENSBTAG00000005898/ENSBTAG00000020034	ADCY8/TGS1/LYN
	10235805	23585510	14	ENSBTAG00000005898/ENSBTAG00000020034	TGS1/LYN
	15924671	64767268	14	ENSBTAG00000005898/ENSBTAG00000020034/ENSBTAG00000050550/ENSBTAG00000022169/ENSBTAG00000020099/ENSBTAG00000007423/ENSBTAG00000043996/ENSBTAG00000008257/ENSBTAG00000014051	TGS1/LYN/FAM110B/PREX2/STMN2/TNFRSF11B/SAMD12/14/ANGPT1
	20241456	84628243	14	ENSBTAG00000054143/ENSBTAG00000046121/ENSBTAG00000007302/ENSBTAG00000005898/ENSBTAG00000020034/ENSBTAG00000050550/ENSBTAG00000022169/ENSBTAG00000020099/ENSBTAG00000007423/ENSBTAG00000043996/ENSBTAG00000008257/ENSBTAG00000014051	14/14/SLC2A5/TGS1/LYN/FAM110B/PREX2/STMN2/TNFRSF11B/SAMD12/14/ANGPT1
	21581739	26130647	14	ENSBTAG00000005898/ENSBTAG00000020034/ENSBTAG00000050550	TGS1/LYN/FAM110B
	23603843	58640687	14	ENSBTAG00000050550/ENSBTAG00000022169/ENSBTAG00000020099/ENSBTAG00000007423/ENSBTAG00000043996/ENSBTAG00000008257/ENSBTAG00000014051	FAM110B/PREX2/STMN2/TNFRSF11B/SAMD12/14/ANGPT1
	23603843	77610030	14	ENSBTAG00000054143/ENSBTAG00000046121/ENSBTAG00000050550/ENSBTAG00000022169/ENSBTAG00000020099/ENSBTAG00000007423/ENSBTAG00000043996/ENSBTAG00000008257/ENSBTAG00000014051	14/14/FAM110B/PREX2/STMN2/TNFRSF11B/SAMD12/14/ANGPT1
	24326513	27693598	14	ENSBTAG00000050550	FAM110B
	25708285	58611091	14	ENSBTAG00000022169/ENSBTAG00000020099/ENSBTAG00000007423/ENSBTAG00000043996/ENSBTAG00000008257/ENSBTAG00000014051	PREX2/STMN2/TNFRSF11B/SAMD12/14/ANGPT1
	25708285	81125493	14	ENSBTAG00000054143/ENSBTAG00000046121/ENSBTAG00000022169/ENSBTAG00000020099/ENSBTAG00000007423/ENSBTAG00000043996/ENSBTAG00000008257/ENSBTAG00000014051	14/14/PREX2/STMN2/TNFRSF11B/SAMD12/14/ANGPT1
	25708285	84358672	14	ENSBTAG00000054143/ENSBTAG00000046121/ENSBTAG00000007302/ENSBTAG00000022169/ENSBTAG00000020099/ENSBTAG00000007423/ENSBTAG00000043996/ENSBTAG00000008257/ENSBTAG00000014051	14/14/SLC2A5/PREX2/STMN2/TNFRSF11B/SAMD12/14/ANGPT1
	25712569	44941560	14	ENSBTAG00000022169/ENSBTAG00000020099	PREX2/STMN2
	29731180	32196809	14	ENSBTAG00000022169	PREX2
	38440957	84616190	14	ENSBTAG00000054143/ENSBTAG00000046121/ENSBTAG00000007302/ENSBTAG00000020099/ENSBTAG00000007423/ENSBTAG00000043996/ENSBTAG00000008257/ENSBTAG00000014051	14/14/SLC2A5/STMN2/TNFRSF11B/SAMD12/14/ANGPT1
	39542087	51361589	14	ENSBTAG00000020099/ENSBTAG00000007423/ENSBTAG00000043996	STMN2/TNFRSF11B/SAMD12
	39907342	43242051	14	ENSBTAG00000020099	STMN2
	40967636	62253952	14	ENSBTAG00000020099/ENSBTAG00000007423/ENSBTAG00000043996/ENSBTAG00000008257/ENSBTAG00000014051	STMN2/TNFRSF11B/SAMD12/14/ANGPT1
	44983157	51095952	14	ENSBTAG00000007423/ENSBTAG00000043996	TNFRSF11B/SAMD12
	45214692	60208833	14	ENSBTAG00000007423/ENSBTAG00000043996/ENSBTAG00000008257/ENSBTAG00000014051	TNFRSF11B/SAMD12/14/ANGPT1
	45742560	82028369	14	ENSBTAG00000054143/ENSBTAG00000046121/ENSBTAG00000043996/ENSBTAG00000008257/ENSBTAG00000014051	14/14/SAMD12/14/ANGPT1
	46060033	48535019	14	ENSBTAG00000043996	SAMD12
	54912814	57145781	14	ENSBTAG00000008257/ENSBTAG00000014051	14/ANGPT1
	61175089	84540458	14	ENSBTAG00000054143/ENSBTAG00000046121/ENSBTAG00000007302	14/14/SLC2A5
	64480626	77095240	14	ENSBTAG00000054143/ENSBTAG00000046121	14/14
	73629815	82726023	14	ENSBTAG00000046121/ENSBTAG00000007302	14/SLC2A5
	77123730	83452579	14	ENSBTAG00000007302	SLC2A5
	74750	4789493	15	ENSBTAG00000009176	ANKRD49
	74750	18711823	15	ENSBTAG00000009176/ENSBTAG00000052218/ENSBTAG00000018629/ENSBTAG00000012882	ANKRD49/15/CWF19L2/CUL5
	74750	17124155	15	ENSBTAG00000009176/ENSBTAG00000052218/ENSBTAG00000018629	ANKRD49/15/CWF19L2
	74750	24321245	15	ENSBTAG00000009176/ENSBTAG00000052218/ENSBTAG00000018629/ENSBTAG00000012882/ENSBTAG00000054743	ANKRD49/15/CWF19L2/CUL5/15
	74750	32605715	15	ENSBTAG00000009176/ENSBTAG00000052218/ENSBTAG00000018629/ENSBTAG00000012882/ENSBTAG00000054743/ENSBTAG00000011266/ENSBTAG00000005215/ENSBTAG00000042236/ENSBTAG00000018093/ENSBTAG00000012940/ENSBTAG00000006690/ENSBTAG00000016197	ANKRD49/15/CWF19L2/CUL5/15/ZBTB16/IL10RA/15/KMT2A/TMEM25/ARCN1/PHLDB1
	812701	85257312	15	ENSBTAG00000009176/ENSBTAG00000050945/ENSBTAG00000052218/ENSBTAG00000018629/ENSBTAG00000012882/ENSBTAG00000054743/ENSBTAG00000011266/ENSBTAG00000003361/ENSBTAG00000005215/ENSBTAG00000042236/ENSBTAG00000018093/ENSBTAG00000012940/ENSBTAG00000006690/ENSBTAG00000016197/ENSBTAG00000017150/ENSBTAG00000000842/ENSBTAG00000004901/ENSBTAG00000032859/ENSBTAG00000048777/ENSBTAG00000010419/ENSBTAG00000011905	ANKRD49/15/15/CWF19L2/CUL5/15/ZBTB16/METTL15/IL10RA/15/KMT2A/TMEM25/ARCN1/PHLDB1/EHF/UBASH3B/PIK3C2A/15/15/CYP2R1/RRAS2
	812701	54898376	15	ENSBTAG00000009176/ENSBTAG00000052218/ENSBTAG00000018629/ENSBTAG00000012882/ENSBTAG00000054743/ENSBTAG00000011266/ENSBTAG00000005215/ENSBTAG00000042236/ENSBTAG00000018093/ENSBTAG00000012940/ENSBTAG00000006690/ENSBTAG00000016197/ENSBTAG00000000842/ENSBTAG00000004901/ENSBTAG00000032859/ENSBTAG00000048777/ENSBTAG00000010419/ENSBTAG00000011905	ANKRD49/15/CWF19L2/CUL5/15/ZBTB16/IL10RA/15/KMT2A/TMEM25/ARCN1/PHLDB1/UBASH3B/PIK3C2A/15/15/CYP2R1/RRAS2
	4183554	16672091	15	ENSBTAG00000052218/ENSBTAG00000018629	15/CWF19L2
	5001246	24442552	15	ENSBTAG00000052218/ENSBTAG00000018629/ENSBTAG00000012882/ENSBTAG00000054743	15/CWF19L2/CUL5/15
	9846110	34450507	15	ENSBTAG00000052218/ENSBTAG00000018629/ENSBTAG00000012882/ENSBTAG00000054743/ENSBTAG00000011266/ENSBTAG00000005215/ENSBTAG00000042236/ENSBTAG00000018093/ENSBTAG00000012940/ENSBTAG00000006690/ENSBTAG00000016197/ENSBTAG00000000842	15/CWF19L2/CUL5/15/ZBTB16/IL10RA/15/KMT2A/TMEM25/ARCN1/PHLDB1/UBASH3B
	9846110	38268988	15	ENSBTAG00000052218/ENSBTAG00000018629/ENSBTAG00000012882/ENSBTAG00000054743/ENSBTAG00000011266/ENSBTAG00000005215/ENSBTAG00000042236/ENSBTAG00000018093/ENSBTAG00000012940/ENSBTAG00000006690/ENSBTAG00000016197/ENSBTAG00000000842/ENSBTAG00000004901/ENSBTAG00000032859/ENSBTAG00000048777/ENSBTAG00000010419	15/CWF19L2/CUL5/15/ZBTB16/IL10RA/15/KMT2A/TMEM25/ARCN1/PHLDB1/UBASH3B/PIK3C2A/15/15/CYP2R1
	10263772	31835418	15	ENSBTAG00000052218/ENSBTAG00000018629/ENSBTAG00000012882/ENSBTAG00000054743/ENSBTAG00000011266/ENSBTAG00000005215/ENSBTAG00000042236/ENSBTAG00000018093/ENSBTAG00000012940/ENSBTAG00000006690/ENSBTAG00000016197	15/CWF19L2/CUL5/15/ZBTB16/IL10RA/15/KMT2A/TMEM25/ARCN1/PHLDB1
	14436263	47683465	15	ENSBTAG00000052218/ENSBTAG00000018629/ENSBTAG00000012882/ENSBTAG00000054743/ENSBTAG00000011266/ENSBTAG00000005215/ENSBTAG00000042236/ENSBTAG00000018093/ENSBTAG00000012940/ENSBTAG00000006690/ENSBTAG00000016197/ENSBTAG00000000842/ENSBTAG00000004901/ENSBTAG00000032859/ENSBTAG00000048777/ENSBTAG00000010419/ENSBTAG00000011905	15/CWF19L2/CUL5/15/ZBTB16/IL10RA/15/KMT2A/TMEM25/ARCN1/PHLDB1/UBASH3B/PIK3C2A/15/15/CYP2R1/RRAS2
	14451384	20538182	15	ENSBTAG00000052218/ENSBTAG00000018629/ENSBTAG00000012882	15/CWF19L2/CUL5
	16167972	18992057	15	ENSBTAG00000018629/ENSBTAG00000012882	CWF19L2/CUL5
	16577516	18067791	15	ENSBTAG00000012882	CUL5
	16721338	45802833	15	ENSBTAG00000012882/ENSBTAG00000054743/ENSBTAG00000011266/ENSBTAG00000005215/ENSBTAG00000042236/ENSBTAG00000018093/ENSBTAG00000012940/ENSBTAG00000006690/ENSBTAG00000016197/ENSBTAG00000000842/ENSBTAG00000004901/ENSBTAG00000032859/ENSBTAG00000048777/ENSBTAG00000010419/ENSBTAG00000011905	CUL5/15/ZBTB16/IL10RA/15/KMT2A/TMEM25/ARCN1/PHLDB1/UBASH3B/PIK3C2A/15/15/CYP2R1/RRAS2
	17163642	24880436	15	ENSBTAG00000012882/ENSBTAG00000054743/ENSBTAG00000011266	CUL5/15/ZBTB16
	17163642	38268988	15	ENSBTAG00000012882/ENSBTAG00000054743/ENSBTAG00000011266/ENSBTAG00000005215/ENSBTAG00000042236/ENSBTAG00000018093/ENSBTAG00000012940/ENSBTAG00000006690/ENSBTAG00000016197/ENSBTAG00000000842/ENSBTAG00000004901/ENSBTAG00000032859/ENSBTAG00000048777/ENSBTAG00000010419	CUL5/15/ZBTB16/IL10RA/15/KMT2A/TMEM25/ARCN1/PHLDB1/UBASH3B/PIK3C2A/15/15/CYP2R1
	18581717	27410239	15	ENSBTAG00000054743/ENSBTAG00000011266	15/ZBTB16
	18664416	47049057	15	ENSBTAG00000054743/ENSBTAG00000011266/ENSBTAG00000005215/ENSBTAG00000042236/ENSBTAG00000018093/ENSBTAG00000012940/ENSBTAG00000006690/ENSBTAG00000016197/ENSBTAG00000000842/ENSBTAG00000004901/ENSBTAG00000032859/ENSBTAG00000048777/ENSBTAG00000010419/ENSBTAG00000011905	15/ZBTB16/IL10RA/15/KMT2A/TMEM25/ARCN1/PHLDB1/UBASH3B/PIK3C2A/15/15/CYP2R1/RRAS2
	19025669	34062399	15	ENSBTAG00000054743/ENSBTAG00000011266/ENSBTAG00000005215/ENSBTAG00000042236/ENSBTAG00000018093/ENSBTAG00000012940/ENSBTAG00000006690/ENSBTAG00000016197/ENSBTAG00000000842	15/ZBTB16/IL10RA/15/KMT2A/TMEM25/ARCN1/PHLDB1/UBASH3B
	19096101	32944079	15	ENSBTAG00000054743/ENSBTAG00000011266/ENSBTAG00000005215/ENSBTAG00000042236/ENSBTAG00000018093/ENSBTAG00000012940/ENSBTAG00000006690/ENSBTAG00000016197	15/ZBTB16/IL10RA/15/KMT2A/TMEM25/ARCN1/PHLDB1
	19096101	38268988	15	ENSBTAG00000054743/ENSBTAG00000011266/ENSBTAG00000005215/ENSBTAG00000042236/ENSBTAG00000018093/ENSBTAG00000012940/ENSBTAG00000006690/ENSBTAG00000016197/ENSBTAG00000000842/ENSBTAG00000004901/ENSBTAG00000032859/ENSBTAG00000048777/ENSBTAG00000010419	15/ZBTB16/IL10RA/15/KMT2A/TMEM25/ARCN1/PHLDB1/UBASH3B/PIK3C2A/15/15/CYP2R1
	21106423	71069477	15	ENSBTAG00000054743/ENSBTAG00000011266/ENSBTAG00000003361/ENSBTAG00000005215/ENSBTAG00000042236/ENSBTAG00000018093/ENSBTAG00000012940/ENSBTAG00000006690/ENSBTAG00000016197/ENSBTAG00000017150/ENSBTAG00000000842/ENSBTAG00000004901/ENSBTAG00000032859/ENSBTAG00000048777/ENSBTAG00000010419/ENSBTAG00000011905	15/ZBTB16/METTL15/IL10RA/15/KMT2A/TMEM25/ARCN1/PHLDB1/EHF/UBASH3B/PIK3C2A/15/15/CYP2R1/RRAS2
	23330824	78298366	15	ENSBTAG00000011266/ENSBTAG00000003361/ENSBTAG00000005215/ENSBTAG00000042236/ENSBTAG00000018093/ENSBTAG00000012940/ENSBTAG00000006690/ENSBTAG00000016197/ENSBTAG00000017150/ENSBTAG00000000842/ENSBTAG00000004901/ENSBTAG00000032859/ENSBTAG00000048777/ENSBTAG00000010419/ENSBTAG00000011905	ZBTB16/METTL15/IL10RA/15/KMT2A/TMEM25/ARCN1/PHLDB1/EHF/UBASH3B/PIK3C2A/15/15/CYP2R1/RRAS2
	23697508	46754101	15	ENSBTAG00000011266/ENSBTAG00000005215/ENSBTAG00000042236/ENSBTAG00000018093/ENSBTAG00000012940/ENSBTAG00000006690/ENSBTAG00000016197/ENSBTAG00000000842/ENSBTAG00000004901/ENSBTAG00000032859/ENSBTAG00000048777/ENSBTAG00000010419/ENSBTAG00000011905	ZBTB16/IL10RA/15/KMT2A/TMEM25/ARCN1/PHLDB1/UBASH3B/PIK3C2A/15/15/CYP2R1/RRAS2
	24328172	34322250	15	ENSBTAG00000011266/ENSBTAG00000005215/ENSBTAG00000042236/ENSBTAG00000018093/ENSBTAG00000012940/ENSBTAG00000006690/ENSBTAG00000016197/ENSBTAG00000000842	ZBTB16/IL10RA/15/KMT2A/TMEM25/ARCN1/PHLDB1/UBASH3B
	25172612	38268988	15	ENSBTAG00000005215/ENSBTAG00000042236/ENSBTAG00000018093/ENSBTAG00000012940/ENSBTAG00000006690/ENSBTAG00000016197/ENSBTAG00000000842/ENSBTAG00000004901/ENSBTAG00000032859/ENSBTAG00000048777/ENSBTAG00000010419	IL10RA/15/KMT2A/TMEM25/ARCN1/PHLDB1/UBASH3B/PIK3C2A/15/15/CYP2R1
	26910969	33479232	15	ENSBTAG00000005215/ENSBTAG00000042236/ENSBTAG00000018093/ENSBTAG00000012940/ENSBTAG00000006690/ENSBTAG00000016197/ENSBTAG00000000842	IL10RA/15/KMT2A/TMEM25/ARCN1/PHLDB1/UBASH3B
	26932516	29169783	15	ENSBTAG00000005215/ENSBTAG00000042236/ENSBTAG00000018093	IL10RA/15/KMT2A
	27617863	41871763	15	ENSBTAG00000005215/ENSBTAG00000042236/ENSBTAG00000018093/ENSBTAG00000012940/ENSBTAG00000006690/ENSBTAG00000016197/ENSBTAG00000000842/ENSBTAG00000004901/ENSBTAG00000032859/ENSBTAG00000048777/ENSBTAG00000010419/ENSBTAG00000011905	IL10RA/15/KMT2A/TMEM25/ARCN1/PHLDB1/UBASH3B/PIK3C2A/15/15/CYP2R1/RRAS2
	28167939	30122484	15	ENSBTAG00000005215/ENSBTAG00000042236/ENSBTAG00000018093/ENSBTAG00000012940/ENSBTAG00000006690/ENSBTAG00000016197	IL10RA/15/KMT2A/TMEM25/ARCN1/PHLDB1
	28966610	31599942	15	ENSBTAG00000018093/ENSBTAG00000012940/ENSBTAG00000006690/ENSBTAG00000016197	KMT2A/TMEM25/ARCN1/PHLDB1
	29271879	31296371	15	ENSBTAG00000016197	PHLDB1
	31469036	38281190	15	ENSBTAG00000000842/ENSBTAG00000004901/ENSBTAG00000032859/ENSBTAG00000048777/ENSBTAG00000010419	UBASH3B/PIK3C2A/15/15/CYP2R1
	31745902	36780934	15	ENSBTAG00000000842/ENSBTAG00000004901/ENSBTAG00000032859	UBASH3B/PIK3C2A/15
	32750892	34916445	15	ENSBTAG00000000842	UBASH3B
	33099529	46012234	15	ENSBTAG00000000842/ENSBTAG00000004901/ENSBTAG00000032859/ENSBTAG00000048777/ENSBTAG00000010419/ENSBTAG00000011905	UBASH3B/PIK3C2A/15/15/CYP2R1/RRAS2
	35177124	37338267	15	ENSBTAG00000004901/ENSBTAG00000032859	PIK3C2A/15
	35333265	37444705	15	ENSBTAG00000004901	PIK3C2A
	35411652	38154882	15	ENSBTAG00000048777/ENSBTAG00000010419	15/CYP2R1
	36211338	38879030	15	ENSBTAG00000048777/ENSBTAG00000010419/ENSBTAG00000011905	15/CYP2R1/RRAS2
	38281190	46002857	15	ENSBTAG00000011905	RRAS2
	39177823	85257312	15	ENSBTAG00000050945/ENSBTAG00000003361/ENSBTAG00000017150	15/METTL15/EHF
	41560256	72624841	15	ENSBTAG00000003361/ENSBTAG00000017150	METTL15/EHF
	58662790	61341539	15	ENSBTAG00000003361	METTL15
	61528298	82372188	15	ENSBTAG00000050945/ENSBTAG00000017150	15/EHF
	63110430	65742925	15	ENSBTAG00000017150	EHF
	35920	13816625	16	ENSBTAG00000045895/ENSBTAG00000001483/ENSBTAG00000013294/ENSBTAG00000038107/ENSBTAG00000052428/ENSBTAG00000048443	NFASC/SRGAP2/DYRK3/MAPKAPK2/16/16
	35920	16244657	16	ENSBTAG00000045895/ENSBTAG00000001483/ENSBTAG00000013294/ENSBTAG00000038107/ENSBTAG00000052428/ENSBTAG00000048443/ENSBTAG00000008420	NFASC/SRGAP2/DYRK3/MAPKAPK2/16/16/BRINP3
	35920	27271296	16	ENSBTAG00000045895/ENSBTAG00000001483/ENSBTAG00000013294/ENSBTAG00000038107/ENSBTAG00000052428/ENSBTAG00000048443/ENSBTAG00000008420/ENSBTAG00000018824	NFASC/SRGAP2/DYRK3/MAPKAPK2/16/16/BRINP3/MIA3
	35920	41131268	16	ENSBTAG00000050432/ENSBTAG00000001821/ENSBTAG00000045895/ENSBTAG00000001483/ENSBTAG00000013294/ENSBTAG00000038107/ENSBTAG00000052428/ENSBTAG00000048443/ENSBTAG00000008420/ENSBTAG00000018824/ENSBTAG00000011508	16/PRRC2C/NFASC/SRGAP2/DYRK3/MAPKAPK2/16/16/BRINP3/MIA3/H3F3C
	73143	6705937	16	ENSBTAG00000045895/ENSBTAG00000001483/ENSBTAG00000013294/ENSBTAG00000038107	NFASC/SRGAP2/DYRK3/MAPKAPK2
	1517987	3621602	16	ENSBTAG00000045895	NFASC
	4567154	13816625	16	ENSBTAG00000052428/ENSBTAG00000048443	16/16
	5275889	66365432	16	ENSBTAG00000050432/ENSBTAG00000001821/ENSBTAG00000052428/ENSBTAG00000048443/ENSBTAG00000008420/ENSBTAG00000048308/ENSBTAG00000014423/ENSBTAG00000040477/ENSBTAG00000018824/ENSBTAG00000031749/ENSBTAG00000010737/ENSBTAG00000050720/ENSBTAG00000047755/ENSBTAG00000002575/ENSBTAG00000011508/ENSBTAG00000018303/ENSBTAG00000054408/ENSBTAG00000015537	16/PRRC2C/16/16/BRINP3/ICMT/16/CHD5/MIA3/SLC35E2/CDK11B/16/FNDC10/SSU72/H3F3C/PAPPA2/bta-mir-2285x/RASAL2
	5938657	16811335	16	ENSBTAG00000052428/ENSBTAG00000048443/ENSBTAG00000008420	16/16/BRINP3
	5938657	26143860	16	ENSBTAG00000052428/ENSBTAG00000048443/ENSBTAG00000008420/ENSBTAG00000018824	16/16/BRINP3/MIA3
	5938657	32241034	16	ENSBTAG00000052428/ENSBTAG00000048443/ENSBTAG00000008420/ENSBTAG00000018824/ENSBTAG00000011508	16/16/BRINP3/MIA3/H3F3C
	5938657	38807074	16	ENSBTAG00000050432/ENSBTAG00000052428/ENSBTAG00000048443/ENSBTAG00000008420/ENSBTAG00000018824/ENSBTAG00000011508	16/16/16/BRINP3/MIA3/H3F3C
	13952365	33175079	16	ENSBTAG00000008420/ENSBTAG00000018824/ENSBTAG00000011508	BRINP3/MIA3/H3F3C
	14071161	15362423	16	ENSBTAG00000008420	BRINP3
	15241094	28684222	16	ENSBTAG00000008420/ENSBTAG00000018824	BRINP3/MIA3
	15269645	38112433	16	ENSBTAG00000050432/ENSBTAG00000008420/ENSBTAG00000018824/ENSBTAG00000011508	16/BRINP3/MIA3/H3F3C
	17283997	58999919	16	ENSBTAG00000050432/ENSBTAG00000001821/ENSBTAG00000048308/ENSBTAG00000014423/ENSBTAG00000040477/ENSBTAG00000018824/ENSBTAG00000031749/ENSBTAG00000010737/ENSBTAG00000050720/ENSBTAG00000047755/ENSBTAG00000002575/ENSBTAG00000011508/ENSBTAG00000018303	16/PRRC2C/ICMT/16/CHD5/MIA3/SLC35E2/CDK11B/16/FNDC10/SSU72/H3F3C/PAPPA2
	17678224	28684222	16	ENSBTAG00000018824	MIA3
	20868185	41016073	16	ENSBTAG00000050432/ENSBTAG00000001821/ENSBTAG00000018824/ENSBTAG00000011508	16/PRRC2C/MIA3/H3F3C
	21443335	61417656	16	ENSBTAG00000050432/ENSBTAG00000001821/ENSBTAG00000048308/ENSBTAG00000014423/ENSBTAG00000040477/ENSBTAG00000018824/ENSBTAG00000031749/ENSBTAG00000010737/ENSBTAG00000050720/ENSBTAG00000047755/ENSBTAG00000002575/ENSBTAG00000011508/ENSBTAG00000018303/ENSBTAG00000054408/ENSBTAG00000015537	16/PRRC2C/ICMT/16/CHD5/MIA3/SLC35E2/CDK11B/16/FNDC10/SSU72/H3F3C/PAPPA2/bta-mir-2285x/RASAL2
	21551688	81322588	16	ENSBTAG00000008710/ENSBTAG00000053350/ENSBTAG00000008944/ENSBTAG00000050432/ENSBTAG00000054124/ENSBTAG00000049945/ENSBTAG00000023144/ENSBTAG00000052560/ENSBTAG00000055184/ENSBTAG00000052684/ENSBTAG00000001821/ENSBTAG00000006175/ENSBTAG00000051303/ENSBTAG00000047648/ENSBTAG00000048308/ENSBTAG00000014423/ENSBTAG00000040477/ENSBTAG00000018824/ENSBTAG00000031749/ENSBTAG00000010737/ENSBTAG00000050720/…	KCNH1/U6/CRB1/16/16/16/PTPRC/16/16/16/PRRC2C/KDM5B/bta-mir-10180/SYT2/ICMT/16/CHD5/MIA3/SLC35E2/CDK11B/16/FNDC10/SSU72/H3F3C/PAPPA2/bta-mir-2285x/RASAL2/BATF3
	21999496	31725777	16	ENSBTAG00000018824/ENSBTAG00000011508	MIA3/H3F3C
	23664440	50822856	16	ENSBTAG00000050432/ENSBTAG00000001821/ENSBTAG00000048308/ENSBTAG00000014423/ENSBTAG00000040477/ENSBTAG00000018824/ENSBTAG00000011508	16/PRRC2C/ICMT/16/CHD5/MIA3/H3F3C
	26391797	63944630	16	ENSBTAG00000050432/ENSBTAG00000001821/ENSBTAG00000048308/ENSBTAG00000014423/ENSBTAG00000040477/ENSBTAG00000031749/ENSBTAG00000010737/ENSBTAG00000050720/ENSBTAG00000047755/ENSBTAG00000002575/ENSBTAG00000011508/ENSBTAG00000018303/ENSBTAG00000054408/ENSBTAG00000015537	16/PRRC2C/ICMT/16/CHD5/SLC35E2/CDK11B/16/FNDC10/SSU72/H3F3C/PAPPA2/bta-mir-2285x/RASAL2
	27187176	81688070	16	ENSBTAG00000008710/ENSBTAG00000053350/ENSBTAG00000008944/ENSBTAG00000050432/ENSBTAG00000054124/ENSBTAG00000049945/ENSBTAG00000023144/ENSBTAG00000052560/ENSBTAG00000055184/ENSBTAG00000052684/ENSBTAG00000001821/ENSBTAG00000006175/ENSBTAG00000051303/ENSBTAG00000047648/ENSBTAG00000048308/ENSBTAG00000014423/ENSBTAG00000040477/ENSBTAG00000031749/ENSBTAG00000010737/ENSBTAG00000050720/ENSBTAG00000047755/…	KCNH1/U6/CRB1/16/16/16/PTPRC/16/16/16/PRRC2C/KDM5B/bta-mir-10180/SYT2/ICMT/16/CHD5/SLC35E2/CDK11B/16/FNDC10/SSU72/H3F3C/PAPPA2/bta-mir-2285x/RASAL2/BATF3
	27334730	38481520	16	ENSBTAG00000050432/ENSBTAG00000011508	16/H3F3C
	27671754	49355913	16	ENSBTAG00000050432/ENSBTAG00000001821/ENSBTAG00000048308/ENSBTAG00000014423/ENSBTAG00000040477/ENSBTAG00000011508	16/PRRC2C/ICMT/16/CHD5/H3F3C
	29600490	74741746	16	ENSBTAG00000008710/ENSBTAG00000053350/ENSBTAG00000050432/ENSBTAG00000001821/ENSBTAG00000048308/ENSBTAG00000014423/ENSBTAG00000040477/ENSBTAG00000031749/ENSBTAG00000010737/ENSBTAG00000050720/ENSBTAG00000047755/ENSBTAG00000002575/ENSBTAG00000011508/ENSBTAG00000018303/ENSBTAG00000054408/ENSBTAG00000015537/ENSBTAG00000011982	KCNH1/U6/16/PRRC2C/ICMT/16/CHD5/SLC35E2/CDK11B/16/FNDC10/SSU72/H3F3C/PAPPA2/bta-mir-2285x/RASAL2/BATF3
	29812601	32019139	16	ENSBTAG00000011508	H3F3C
	30441131	55167020	16	ENSBTAG00000050432/ENSBTAG00000001821/ENSBTAG00000048308/ENSBTAG00000014423/ENSBTAG00000040477/ENSBTAG00000031749/ENSBTAG00000010737/ENSBTAG00000050720/ENSBTAG00000047755/ENSBTAG00000002575/ENSBTAG00000011508	16/PRRC2C/ICMT/16/CHD5/SLC35E2/CDK11B/16/FNDC10/SSU72/H3F3C
	31605270	49386191	16	ENSBTAG00000050432/ENSBTAG00000001821/ENSBTAG00000048308/ENSBTAG00000014423/ENSBTAG00000040477	16/PRRC2C/ICMT/16/CHD5
	32095335	59127147	16	ENSBTAG00000050432/ENSBTAG00000001821/ENSBTAG00000048308/ENSBTAG00000014423/ENSBTAG00000040477/ENSBTAG00000031749/ENSBTAG00000010737/ENSBTAG00000050720/ENSBTAG00000047755/ENSBTAG00000002575/ENSBTAG00000018303	16/PRRC2C/ICMT/16/CHD5/SLC35E2/CDK11B/16/FNDC10/SSU72/PAPPA2
	32373410	60615012	16	ENSBTAG00000050432/ENSBTAG00000001821/ENSBTAG00000048308/ENSBTAG00000014423/ENSBTAG00000040477/ENSBTAG00000031749/ENSBTAG00000010737/ENSBTAG00000050720/ENSBTAG00000047755/ENSBTAG00000002575/ENSBTAG00000018303/ENSBTAG00000054408/ENSBTAG00000015537	16/PRRC2C/ICMT/16/CHD5/SLC35E2/CDK11B/16/FNDC10/SSU72/PAPPA2/bta-mir-2285x/RASAL2
	35019142	81637095	16	ENSBTAG00000008710/ENSBTAG00000053350/ENSBTAG00000008944/ENSBTAG00000050432/ENSBTAG00000054124/ENSBTAG00000049945/ENSBTAG00000023144/ENSBTAG00000052560/ENSBTAG00000055184/ENSBTAG00000052684/ENSBTAG00000001821/ENSBTAG00000006175/ENSBTAG00000051303/ENSBTAG00000047648/ENSBTAG00000048308/ENSBTAG00000014423/ENSBTAG00000040477/ENSBTAG00000031749/ENSBTAG00000010737/ENSBTAG00000050720/ENSBTAG00000047755/…	KCNH1/U6/CRB1/16/16/16/PTPRC/16/16/16/PRRC2C/KDM5B/bta-mir-10180/SYT2/ICMT/16/CHD5/SLC35E2/CDK11B/16/FNDC10/SSU72/PAPPA2/bta-mir-2285x/RASAL2/BATF3
	35647597	55188706	16	ENSBTAG00000050432/ENSBTAG00000001821/ENSBTAG00000048308/ENSBTAG00000014423/ENSBTAG00000040477/ENSBTAG00000031749/ENSBTAG00000010737/ENSBTAG00000050720/ENSBTAG00000047755/ENSBTAG00000002575	16/PRRC2C/ICMT/16/CHD5/SLC35E2/CDK11B/16/FNDC10/SSU72
	36539853	68811897	16	ENSBTAG00000001821/ENSBTAG00000048308/ENSBTAG00000014423/ENSBTAG00000040477/ENSBTAG00000031749/ENSBTAG00000010737/ENSBTAG00000050720/ENSBTAG00000047755/ENSBTAG00000002575/ENSBTAG00000018303/ENSBTAG00000054408/ENSBTAG00000015537	PRRC2C/ICMT/16/CHD5/SLC35E2/CDK11B/16/FNDC10/SSU72/PAPPA2/bta-mir-2285x/RASAL2
	36673696	81688070	16	ENSBTAG00000008710/ENSBTAG00000053350/ENSBTAG00000008944/ENSBTAG00000054124/ENSBTAG00000049945/ENSBTAG00000023144/ENSBTAG00000052560/ENSBTAG00000055184/ENSBTAG00000052684/ENSBTAG00000001821/ENSBTAG00000006175/ENSBTAG00000051303/ENSBTAG00000047648/ENSBTAG00000048308/ENSBTAG00000014423/ENSBTAG00000040477/ENSBTAG00000031749/ENSBTAG00000010737/ENSBTAG00000050720/ENSBTAG00000047755/ENSBTAG00000002575/…	KCNH1/U6/CRB1/16/16/PTPRC/16/16/16/PRRC2C/KDM5B/bta-mir-10180/SYT2/ICMT/16/CHD5/SLC35E2/CDK11B/16/FNDC10/SSU72/PAPPA2/bta-mir-2285x/RASAL2/BATF3
	37087764	59052006	16	ENSBTAG00000001821/ENSBTAG00000048308/ENSBTAG00000014423/ENSBTAG00000040477/ENSBTAG00000031749/ENSBTAG00000010737/ENSBTAG00000050720/ENSBTAG00000047755/ENSBTAG00000002575/ENSBTAG00000018303	PRRC2C/ICMT/16/CHD5/SLC35E2/CDK11B/16/FNDC10/SSU72/PAPPA2
	37479436	55167020	16	ENSBTAG00000001821/ENSBTAG00000048308/ENSBTAG00000014423/ENSBTAG00000040477/ENSBTAG00000031749/ENSBTAG00000010737/ENSBTAG00000050720/ENSBTAG00000047755/ENSBTAG00000002575	PRRC2C/ICMT/16/CHD5/SLC35E2/CDK11B/16/FNDC10/SSU72
	37505165	39690375	16	ENSBTAG00000001821	PRRC2C
	39236591	65758820	16	ENSBTAG00000048308/ENSBTAG00000014423/ENSBTAG00000040477/ENSBTAG00000031749/ENSBTAG00000010737/ENSBTAG00000050720/ENSBTAG00000047755/ENSBTAG00000002575/ENSBTAG00000018303/ENSBTAG00000054408/ENSBTAG00000015537	ICMT/16/CHD5/SLC35E2/CDK11B/16/FNDC10/SSU72/PAPPA2/bta-mir-2285x/RASAL2
	43371269	79942218	16	ENSBTAG00000008710/ENSBTAG00000053350/ENSBTAG00000008944/ENSBTAG00000054124/ENSBTAG00000049945/ENSBTAG00000023144/ENSBTAG00000052560/ENSBTAG00000055184/ENSBTAG00000052684/ENSBTAG00000048308/ENSBTAG00000014423/ENSBTAG00000040477/ENSBTAG00000031749/ENSBTAG00000010737/ENSBTAG00000050720/ENSBTAG00000047755/ENSBTAG00000002575/ENSBTAG00000018303/ENSBTAG00000054408/ENSBTAG00000015537/ENSBTAG00000011982	KCNH1/U6/CRB1/16/16/PTPRC/16/16/16/ICMT/16/CHD5/SLC35E2/CDK11B/16/FNDC10/SSU72/PAPPA2/bta-mir-2285x/RASAL2/BATF3
	45049521	47942535	16	ENSBTAG00000048308/ENSBTAG00000014423/ENSBTAG00000040477	ICMT/16/CHD5
	46549581	51267407	16	ENSBTAG00000048308/ENSBTAG00000014423/ENSBTAG00000040477/ENSBTAG00000031749/ENSBTAG00000010737/ENSBTAG00000050720/ENSBTAG00000047755/ENSBTAG00000002575	ICMT/16/CHD5/SLC35E2/CDK11B/16/FNDC10/SSU72
	47201903	49867758	16	ENSBTAG00000040477	CHD5
	49176040	53199787	16	ENSBTAG00000031749/ENSBTAG00000010737/ENSBTAG00000050720/ENSBTAG00000047755/ENSBTAG00000002575	SLC35E2/CDK11B/16/FNDC10/SSU72
	49730423	64276198	16	ENSBTAG00000031749/ENSBTAG00000010737/ENSBTAG00000050720/ENSBTAG00000047755/ENSBTAG00000002575/ENSBTAG00000018303/ENSBTAG00000054408/ENSBTAG00000015537	SLC35E2/CDK11B/16/FNDC10/SSU72/PAPPA2/bta-mir-2285x/RASAL2
	55010419	77648438	16	ENSBTAG00000008710/ENSBTAG00000053350/ENSBTAG00000008944/ENSBTAG00000054124/ENSBTAG00000049945/ENSBTAG00000023144/ENSBTAG00000018303/ENSBTAG00000054408/ENSBTAG00000015537/ENSBTAG00000011982	KCNH1/U6/CRB1/16/16/PTPRC/PAPPA2/bta-mir-2285x/RASAL2/BATF3
	55555392	60579059	16	ENSBTAG00000018303/ENSBTAG00000054408/ENSBTAG00000015537	PAPPA2/bta-mir-2285x/RASAL2
	55606873	81220660	16	ENSBTAG00000008710/ENSBTAG00000053350/ENSBTAG00000008944/ENSBTAG00000054124/ENSBTAG00000049945/ENSBTAG00000023144/ENSBTAG00000052560/ENSBTAG00000055184/ENSBTAG00000052684/ENSBTAG00000006175/ENSBTAG00000051303/ENSBTAG00000047648/ENSBTAG00000018303/ENSBTAG00000054408/ENSBTAG00000015537/ENSBTAG00000011982	KCNH1/U6/CRB1/16/16/PTPRC/16/16/16/KDM5B/bta-mir-10180/SYT2/PAPPA2/bta-mir-2285x/RASAL2/BATF3
	55643975	73787623	16	ENSBTAG00000008710/ENSBTAG00000053350/ENSBTAG00000018303/ENSBTAG00000054408/ENSBTAG00000015537/ENSBTAG00000011982	KCNH1/U6/PAPPA2/bta-mir-2285x/RASAL2/BATF3
	56448934	59127147	16	ENSBTAG00000018303	PAPPA2
	59613869	61041972	16	ENSBTAG00000015537	RASAL2
	60181412	81688070	16	ENSBTAG00000008710/ENSBTAG00000053350/ENSBTAG00000008944/ENSBTAG00000054124/ENSBTAG00000049945/ENSBTAG00000023144/ENSBTAG00000052560/ENSBTAG00000055184/ENSBTAG00000052684/ENSBTAG00000006175/ENSBTAG00000051303/ENSBTAG00000047648/ENSBTAG00000011982	KCNH1/U6/CRB1/16/16/PTPRC/16/16/16/KDM5B/bta-mir-10180/SYT2/BATF3
	63987694	76522826	16	ENSBTAG00000008710/ENSBTAG00000053350/ENSBTAG00000008944/ENSBTAG00000011982	KCNH1/U6/CRB1/BATF3
	65704897	78670000	16	ENSBTAG00000008710/ENSBTAG00000053350/ENSBTAG00000008944/ENSBTAG00000054124/ENSBTAG00000049945/ENSBTAG00000023144/ENSBTAG00000011982	KCNH1/U6/CRB1/16/16/PTPRC/BATF3
	68069139	79292968	16	ENSBTAG00000008710/ENSBTAG00000053350/ENSBTAG00000008944/ENSBTAG00000054124/ENSBTAG00000049945/ENSBTAG00000023144/ENSBTAG00000052560/ENSBTAG00000055184/ENSBTAG00000052684/ENSBTAG00000011982	KCNH1/U6/CRB1/16/16/PTPRC/16/16/16/BATF3
	70754436	74618645	16	ENSBTAG00000008710/ENSBTAG00000053350/ENSBTAG00000011982	KCNH1/U6/BATF3
	72365972	75462069	16	ENSBTAG00000008710/ENSBTAG00000053350	KCNH1/U6
	74581221	79658368	16	ENSBTAG00000008944/ENSBTAG00000054124/ENSBTAG00000049945/ENSBTAG00000023144/ENSBTAG00000052560/ENSBTAG00000055184/ENSBTAG00000052684	CRB1/16/16/PTPRC/16/16/16
	75232924	81322588	16	ENSBTAG00000008944/ENSBTAG00000054124/ENSBTAG00000049945/ENSBTAG00000023144/ENSBTAG00000052560/ENSBTAG00000055184/ENSBTAG00000052684/ENSBTAG00000006175/ENSBTAG00000051303/ENSBTAG00000047648	CRB1/16/16/PTPRC/16/16/16/KDM5B/bta-mir-10180/SYT2
	76758969	79251050	16	ENSBTAG00000054124/ENSBTAG00000049945/ENSBTAG00000023144/ENSBTAG00000052560/ENSBTAG00000055184/ENSBTAG00000052684	16/16/PTPRC/16/16/16
	76781132	78655234	16	ENSBTAG00000054124/ENSBTAG00000049945/ENSBTAG00000023144	16/16/PTPRC
	77110928	81322588	16	ENSBTAG00000054124/ENSBTAG00000049945/ENSBTAG00000023144/ENSBTAG00000052560/ENSBTAG00000055184/ENSBTAG00000052684/ENSBTAG00000006175/ENSBTAG00000051303/ENSBTAG00000047648	16/16/PTPRC/16/16/16/KDM5B/bta-mir-10180/SYT2
	78508994	81322588	16	ENSBTAG00000052560/ENSBTAG00000055184/ENSBTAG00000052684/ENSBTAG00000006175/ENSBTAG00000051303/ENSBTAG00000047648	16/16/16/KDM5B/bta-mir-10180/SYT2
	78729618	79942218	16	ENSBTAG00000052560/ENSBTAG00000055184/ENSBTAG00000052684	16/16/16
	79738495	81688070	16	ENSBTAG00000006175/ENSBTAG00000051303/ENSBTAG00000047648	KDM5B/bta-mir-10180/SYT2
	80027430	81637095	16	ENSBTAG00000047648	SYT2
	81655	27097698	17	ENSBTAG00000024545/ENSBTAG00000020594	DCHS2/ELF2
	974980	5323939	17	ENSBTAG00000024545	DCHS2
	15861327	35337110	17	ENSBTAG00000020594/ENSBTAG00000020883	ELF2/IL2
	16441272	48703634	17	ENSBTAG00000020594/ENSBTAG00000020883/ENSBTAG00000040336/ENSBTAG00000039316/ENSBTAG00000006753	ELF2/IL2/ZNF268/ZNF268/MBD3L1
	16671727	19531885	17	ENSBTAG00000020594	ELF2
	17926492	62223385	17	ENSBTAG00000020594/ENSBTAG00000020883/ENSBTAG00000040336/ENSBTAG00000039316/ENSBTAG00000006753/ENSBTAG00000000908/ENSBTAG00000049993/ENSBTAG00000047904/ENSBTAG00000002328/ENSBTAG00000008571	ELF2/IL2/ZNF268/ZNF268/MBD3L1/HCAR1/17/17/KDM2B/CUX2
	27459029	65393511	17	ENSBTAG00000020883/ENSBTAG00000040336/ENSBTAG00000039316/ENSBTAG00000006753/ENSBTAG00000000908/ENSBTAG00000049993/ENSBTAG00000047904/ENSBTAG00000002328/ENSBTAG00000008571	IL2/ZNF268/ZNF268/MBD3L1/HCAR1/17/17/KDM2B/CUX2
	28492346	53136440	17	ENSBTAG00000020883/ENSBTAG00000040336/ENSBTAG00000039316/ENSBTAG00000006753/ENSBTAG00000000908/ENSBTAG00000049993/ENSBTAG00000047904	IL2/ZNF268/ZNF268/MBD3L1/HCAR1/17/17
	29881642	35340553	17	ENSBTAG00000020883	IL2
	30557960	75132928	17	ENSBTAG00000006569/ENSBTAG00000013147/ENSBTAG00000002828/ENSBTAG00000010662/ENSBTAG00000047538/ENSBTAG00000005951/ENSBTAG00000030927/ENSBTAG00000020883/ENSBTAG00000040336/ENSBTAG00000039316/ENSBTAG00000006753/ENSBTAG00000000908/ENSBTAG00000049993/ENSBTAG00000047904/ENSBTAG00000002328/ENSBTAG00000008571	SEZ6L/NEFH/RNF185/LIMK2/17/HIC2/17/IL2/ZNF268/ZNF268/MBD3L1/HCAR1/17/17/KDM2B/CUX2
	31937672	51024797	17	ENSBTAG00000020883/ENSBTAG00000040336/ENSBTAG00000039316/ENSBTAG00000006753	IL2/ZNF268/ZNF268/MBD3L1
	36444276	75132928	17	ENSBTAG00000006569/ENSBTAG00000013147/ENSBTAG00000002828/ENSBTAG00000010662/ENSBTAG00000047538/ENSBTAG00000005951/ENSBTAG00000030927/ENSBTAG00000040336/ENSBTAG00000039316/ENSBTAG00000006753/ENSBTAG00000000908/ENSBTAG00000049993/ENSBTAG00000047904/ENSBTAG00000002328/ENSBTAG00000008571	SEZ6L/NEFH/RNF185/LIMK2/17/HIC2/17/ZNF268/ZNF268/MBD3L1/HCAR1/17/17/KDM2B/CUX2
	36950676	66335733	17	ENSBTAG00000006569/ENSBTAG00000040336/ENSBTAG00000039316/ENSBTAG00000006753/ENSBTAG00000000908/ENSBTAG00000049993/ENSBTAG00000047904/ENSBTAG00000002328/ENSBTAG00000008571	SEZ6L/ZNF268/ZNF268/MBD3L1/HCAR1/17/17/KDM2B/CUX2
	42688661	47334911	17	ENSBTAG00000040336/ENSBTAG00000039316/ENSBTAG00000006753	ZNF268/ZNF268/MBD3L1
	43412455	55884612	17	ENSBTAG00000040336/ENSBTAG00000039316/ENSBTAG00000006753/ENSBTAG00000000908/ENSBTAG00000049993/ENSBTAG00000047904/ENSBTAG00000002328/ENSBTAG00000008571	ZNF268/ZNF268/MBD3L1/HCAR1/17/17/KDM2B/CUX2
	47231756	75132928	17	ENSBTAG00000006569/ENSBTAG00000013147/ENSBTAG00000002828/ENSBTAG00000010662/ENSBTAG00000047538/ENSBTAG00000005951/ENSBTAG00000030927/ENSBTAG00000000908/ENSBTAG00000049993/ENSBTAG00000047904/ENSBTAG00000002328/ENSBTAG00000008571	SEZ6L/NEFH/RNF185/LIMK2/17/HIC2/17/HCAR1/17/17/KDM2B/CUX2
	52627135	63480469	17	ENSBTAG00000000908/ENSBTAG00000049993/ENSBTAG00000047904/ENSBTAG00000002328/ENSBTAG00000008571	HCAR1/17/17/KDM2B/CUX2
	52778195	54688887	17	ENSBTAG00000000908/ENSBTAG00000049993/ENSBTAG00000047904/ENSBTAG00000002328	HCAR1/17/17/KDM2B
	53380564	73678846	17	ENSBTAG00000006569/ENSBTAG00000013147/ENSBTAG00000002828/ENSBTAG00000010662/ENSBTAG00000047538/ENSBTAG00000005951/ENSBTAG00000030927/ENSBTAG00000002328/ENSBTAG00000008571	SEZ6L/NEFH/RNF185/LIMK2/17/HIC2/17/KDM2B/CUX2
	54408755	75132928	17	ENSBTAG00000006569/ENSBTAG00000013147/ENSBTAG00000002828/ENSBTAG00000010662/ENSBTAG00000047538/ENSBTAG00000005951/ENSBTAG00000030927/ENSBTAG00000008571	SEZ6L/NEFH/RNF185/LIMK2/17/HIC2/17/CUX2
	54434179	56999053	17	ENSBTAG00000008571	CUX2
	63775109	66992594	17	ENSBTAG00000006569	SEZ6L
	65866532	75058715	17	ENSBTAG00000006569/ENSBTAG00000013147/ENSBTAG00000002828/ENSBTAG00000010662/ENSBTAG00000047538/ENSBTAG00000005951/ENSBTAG00000030927	SEZ6L/NEFH/RNF185/LIMK2/17/HIC2/17
	65955687	69360236	17	ENSBTAG00000006569/ENSBTAG00000013147	SEZ6L/NEFH
	66830235	75058715	17	ENSBTAG00000013147/ENSBTAG00000002828/ENSBTAG00000010662/ENSBTAG00000047538/ENSBTAG00000005951/ENSBTAG00000030927	NEFH/RNF185/LIMK2/17/HIC2/17
	67605994	71788904	17	ENSBTAG00000013147/ENSBTAG00000002828/ENSBTAG00000010662	NEFH/RNF185/LIMK2
	68815004	71231159	17	ENSBTAG00000002828/ENSBTAG00000010662	RNF185/LIMK2
	68977349	75058715	17	ENSBTAG00000002828/ENSBTAG00000010662/ENSBTAG00000047538/ENSBTAG00000005951/ENSBTAG00000030927	RNF185/LIMK2/17/HIC2/17
	71925055	74508803	17	ENSBTAG00000047538/ENSBTAG00000005951/ENSBTAG00000030927	17/HIC2/17
	44799	15547815	18	ENSBTAG00000009918/ENSBTAG00000001904/ENSBTAG00000040356/ENSBTAG00000011995/ENSBTAG00000039914/ENSBTAG00000007184/ENSBTAG00000018146/ENSBTAG00000015894/ENSBTAG00000052533/ENSBTAG00000002103/ENSBTAG00000045367	GSE1/ZNF276/SPIRE2/18/18/NUDT7/VAT1L/WWOX/bta-mir-2285al/PLCG2/SNORA70
	44799	16307788	18	ENSBTAG00000009918/ENSBTAG00000001904/ENSBTAG00000040356/ENSBTAG00000004806/ENSBTAG00000011995/ENSBTAG00000039914/ENSBTAG00000007184/ENSBTAG00000018146/ENSBTAG00000015894/ENSBTAG00000052533/ENSBTAG00000002103/ENSBTAG00000045367	GSE1/ZNF276/SPIRE2/PHKB/18/18/NUDT7/VAT1L/WWOX/bta-mir-2285al/PLCG2/SNORA70
	44799	22714054	18	ENSBTAG00000009918/ENSBTAG00000001904/ENSBTAG00000040356/ENSBTAG00000004806/ENSBTAG00000052469/ENSBTAG00000002287/ENSBTAG00000011995/ENSBTAG00000039914/ENSBTAG00000007184/ENSBTAG00000018146/ENSBTAG00000015894/ENSBTAG00000052533/ENSBTAG00000002103/ENSBTAG00000045367	GSE1/ZNF276/SPIRE2/PHKB/18/CHD9/18/18/NUDT7/VAT1L/WWOX/bta-mir-2285al/PLCG2/SNORA70
	44799	29181633	18	ENSBTAG00000009918/ENSBTAG00000001904/ENSBTAG00000040356/ENSBTAG00000004806/ENSBTAG00000052469/ENSBTAG00000002287/ENSBTAG00000004838/ENSBTAG00000019272/ENSBTAG00000051128/ENSBTAG00000003353/ENSBTAG00000011021/ENSBTAG00000001851/ENSBTAG00000011995/ENSBTAG00000039914/ENSBTAG00000007184/ENSBTAG00000018146/ENSBTAG00000015894/ENSBTAG00000052533/ENSBTAG00000002103/ENSBTAG00000045367	GSE1/ZNF276/SPIRE2/PHKB/18/CHD9/IRX5/LPCAT2/U6/SLC6A2/CES1/18/18/18/NUDT7/VAT1L/WWOX/bta-mir-2285al/PLCG2/SNORA70
	44799	45044333	18	ENSBTAG00000009918/ENSBTAG00000001904/ENSBTAG00000040356/ENSBTAG00000004806/ENSBTAG00000052469/ENSBTAG00000002287/ENSBTAG00000004838/ENSBTAG00000019272/ENSBTAG00000051128/ENSBTAG00000003353/ENSBTAG00000011021/ENSBTAG00000001851/ENSBTAG00000002412/ENSBTAG00000010403/ENSBTAG00000047062/ENSBTAG00000011995/ENSBTAG00000039914/ENSBTAG00000007184/ENSBTAG00000018146/ENSBTAG00000015894/ENSBTAG00000052533/…	GSE1/ZNF276/SPIRE2/PHKB/18/CHD9/IRX5/LPCAT2/U6/SLC6A2/CES1/18/CYB5B/FAAP24/LRP3/18/18/NUDT7/VAT1L/WWOX/bta-mir-2285al/PLCG2/SNORA70
	44799	63658148	18	ENSBTAG00000009918/ENSBTAG00000006999/ENSBTAG00000001904/ENSBTAG00000040356/ENSBTAG00000004806/ENSBTAG00000052469/ENSBTAG00000002287/ENSBTAG00000004838/ENSBTAG00000019272/ENSBTAG00000051128/ENSBTAG00000003353/ENSBTAG00000011021/ENSBTAG00000001851/ENSBTAG00000053222/ENSBTAG00000020251/ENSBTAG00000002412/ENSBTAG00000009493/ENSBTAG00000009494/ENSBTAG00000009495/ENSBTAG00000015318/ENSBTAG00000001781/…	GSE1/RYR1/ZNF276/SPIRE2/PHKB/18/CHD9/IRX5/LPCAT2/U6/SLC6A2/CES1/18/18/LYPD4/CYB5B/BCL3/CBLC/BCAM/NECTIN2/TOMM40/PPM1N/VASP/18/18/FAAP24/BICRA/LRP3/SNRNP70/LIN7B/PPFIA3/TRPM4/18/18/NUDT7/VAT1L/WWOX/bta-mir-2285al/PLCG2/SNORA70
	1094150	12491673	18	ENSBTAG00000009918/ENSBTAG00000011995/ENSBTAG00000039914/ENSBTAG00000007184/ENSBTAG00000018146/ENSBTAG00000015894/ENSBTAG00000052533/ENSBTAG00000002103/ENSBTAG00000045367	GSE1/18/18/NUDT7/VAT1L/WWOX/bta-mir-2285al/PLCG2/SNORA70
	1381786	37166881	18	ENSBTAG00000009918/ENSBTAG00000001904/ENSBTAG00000040356/ENSBTAG00000004806/ENSBTAG00000052469/ENSBTAG00000002287/ENSBTAG00000004838/ENSBTAG00000019272/ENSBTAG00000051128/ENSBTAG00000003353/ENSBTAG00000011021/ENSBTAG00000001851/ENSBTAG00000002412/ENSBTAG00000011995/ENSBTAG00000039914/ENSBTAG00000007184/ENSBTAG00000018146/ENSBTAG00000015894/ENSBTAG00000052533/ENSBTAG00000002103/ENSBTAG00000045367	GSE1/ZNF276/SPIRE2/PHKB/18/CHD9/IRX5/LPCAT2/U6/SLC6A2/CES1/18/CYB5B/18/18/NUDT7/VAT1L/WWOX/bta-mir-2285al/PLCG2/SNORA70
	1953309	5101055	18	ENSBTAG00000011995/ENSBTAG00000039914/ENSBTAG00000007184/ENSBTAG00000018146	18/18/NUDT7/VAT1L
	1963515	4941799	18	ENSBTAG00000011995/ENSBTAG00000039914	18/18
	2864232	5473290	18	ENSBTAG00000007184/ENSBTAG00000018146/ENSBTAG00000015894	NUDT7/VAT1L/WWOX
	3336203	9577756	18	ENSBTAG00000007184/ENSBTAG00000018146/ENSBTAG00000015894/ENSBTAG00000052533/ENSBTAG00000002103/ENSBTAG00000045367	NUDT7/VAT1L/WWOX/bta-mir-2285al/PLCG2/SNORA70
	3368333	5895114	18	ENSBTAG00000007184/ENSBTAG00000018146/ENSBTAG00000015894/ENSBTAG00000052533	NUDT7/VAT1L/WWOX/bta-mir-2285al
	4064751	46233999	18	ENSBTAG00000009918/ENSBTAG00000001904/ENSBTAG00000040356/ENSBTAG00000004806/ENSBTAG00000052469/ENSBTAG00000002287/ENSBTAG00000004838/ENSBTAG00000019272/ENSBTAG00000051128/ENSBTAG00000003353/ENSBTAG00000011021/ENSBTAG00000001851/ENSBTAG00000002412/ENSBTAG00000010403/ENSBTAG00000047062/ENSBTAG00000007184/ENSBTAG00000018146/ENSBTAG00000015894/ENSBTAG00000052533/ENSBTAG00000002103/ENSBTAG00000045367	GSE1/ZNF276/SPIRE2/PHKB/18/CHD9/IRX5/LPCAT2/U6/SLC6A2/CES1/18/CYB5B/FAAP24/LRP3/NUDT7/VAT1L/WWOX/bta-mir-2285al/PLCG2/SNORA70
	4064751	63124270	18	ENSBTAG00000009918/ENSBTAG00000006999/ENSBTAG00000001904/ENSBTAG00000040356/ENSBTAG00000004806/ENSBTAG00000052469/ENSBTAG00000002287/ENSBTAG00000004838/ENSBTAG00000019272/ENSBTAG00000051128/ENSBTAG00000003353/ENSBTAG00000011021/ENSBTAG00000001851/ENSBTAG00000053222/ENSBTAG00000020251/ENSBTAG00000002412/ENSBTAG00000009493/ENSBTAG00000009494/ENSBTAG00000009495/ENSBTAG00000015318/ENSBTAG00000001781/…	GSE1/RYR1/ZNF276/SPIRE2/PHKB/18/CHD9/IRX5/LPCAT2/U6/SLC6A2/CES1/18/18/LYPD4/CYB5B/BCL3/CBLC/BCAM/NECTIN2/TOMM40/PPM1N/VASP/18/18/FAAP24/BICRA/LRP3/SNRNP70/LIN7B/PPFIA3/TRPM4/NUDT7/VAT1L/WWOX/bta-mir-2285al/PLCG2/SNORA70
	5939925	29181633	18	ENSBTAG00000009918/ENSBTAG00000001904/ENSBTAG00000040356/ENSBTAG00000004806/ENSBTAG00000052469/ENSBTAG00000002287/ENSBTAG00000004838/ENSBTAG00000019272/ENSBTAG00000051128/ENSBTAG00000003353/ENSBTAG00000011021/ENSBTAG00000001851/ENSBTAG00000015894/ENSBTAG00000002103/ENSBTAG00000045367	GSE1/ZNF276/SPIRE2/PHKB/18/CHD9/IRX5/LPCAT2/U6/SLC6A2/CES1/18/WWOX/PLCG2/SNORA70
	5962238	15561600	18	ENSBTAG00000009918/ENSBTAG00000001904/ENSBTAG00000040356/ENSBTAG00000015894/ENSBTAG00000002103/ENSBTAG00000045367	GSE1/ZNF276/SPIRE2/WWOX/PLCG2/SNORA70
	5962238	16307788	18	ENSBTAG00000009918/ENSBTAG00000001904/ENSBTAG00000040356/ENSBTAG00000004806/ENSBTAG00000015894/ENSBTAG00000002103/ENSBTAG00000045367	GSE1/ZNF276/SPIRE2/PHKB/WWOX/PLCG2/SNORA70
	6177801	15023735	18	ENSBTAG00000009918/ENSBTAG00000001904/ENSBTAG00000040356/ENSBTAG00000002103/ENSBTAG00000045367	GSE1/ZNF276/SPIRE2/PLCG2/SNORA70
	7014208	18889566	18	ENSBTAG00000009918/ENSBTAG00000001904/ENSBTAG00000040356/ENSBTAG00000004806/ENSBTAG00000052469/ENSBTAG00000002103/ENSBTAG00000045367	GSE1/ZNF276/SPIRE2/PHKB/18/PLCG2/SNORA70
	7386505	9403168	18	ENSBTAG00000002103/ENSBTAG00000045367	PLCG2/SNORA70
	8326812	27121621	18	ENSBTAG00000009918/ENSBTAG00000001904/ENSBTAG00000040356/ENSBTAG00000004806/ENSBTAG00000052469/ENSBTAG00000002287/ENSBTAG00000004838/ENSBTAG00000019272/ENSBTAG00000051128/ENSBTAG00000003353/ENSBTAG00000011021/ENSBTAG00000001851/ENSBTAG00000002103/ENSBTAG00000045367	GSE1/ZNF276/SPIRE2/PHKB/18/CHD9/IRX5/LPCAT2/U6/SLC6A2/CES1/18/PLCG2/SNORA70
	8765998	48818621	18	ENSBTAG00000009918/ENSBTAG00000006999/ENSBTAG00000001904/ENSBTAG00000040356/ENSBTAG00000004806/ENSBTAG00000052469/ENSBTAG00000002287/ENSBTAG00000004838/ENSBTAG00000019272/ENSBTAG00000051128/ENSBTAG00000003353/ENSBTAG00000011021/ENSBTAG00000001851/ENSBTAG00000002412/ENSBTAG00000010403/ENSBTAG00000047062	GSE1/RYR1/ZNF276/SPIRE2/PHKB/18/CHD9/IRX5/LPCAT2/U6/SLC6A2/CES1/18/CYB5B/FAAP24/LRP3
	9487375	17988032	18	ENSBTAG00000009918/ENSBTAG00000001904/ENSBTAG00000040356/ENSBTAG00000004806	GSE1/ZNF276/SPIRE2/PHKB
	9670662	62708688	18	ENSBTAG00000009918/ENSBTAG00000006999/ENSBTAG00000001904/ENSBTAG00000040356/ENSBTAG00000004806/ENSBTAG00000052469/ENSBTAG00000002287/ENSBTAG00000004838/ENSBTAG00000019272/ENSBTAG00000051128/ENSBTAG00000003353/ENSBTAG00000011021/ENSBTAG00000001851/ENSBTAG00000053222/ENSBTAG00000020251/ENSBTAG00000002412/ENSBTAG00000009493/ENSBTAG00000009494/ENSBTAG00000009495/ENSBTAG00000015318/ENSBTAG00000001781/…	GSE1/RYR1/ZNF276/SPIRE2/PHKB/18/CHD9/IRX5/LPCAT2/U6/SLC6A2/CES1/18/18/LYPD4/CYB5B/BCL3/CBLC/BCAM/NECTIN2/TOMM40/PPM1N/VASP/18/18/FAAP24/BICRA/LRP3/SNRNP70/LIN7B/PPFIA3/TRPM4
	10117349	13276830	18	ENSBTAG00000009918	GSE1
	10827967	25090118	18	ENSBTAG00000009918/ENSBTAG00000001904/ENSBTAG00000040356/ENSBTAG00000004806/ENSBTAG00000052469/ENSBTAG00000002287/ENSBTAG00000004838/ENSBTAG00000019272/ENSBTAG00000051128/ENSBTAG00000003353/ENSBTAG00000011021/ENSBTAG00000001851	GSE1/ZNF276/SPIRE2/PHKB/18/CHD9/IRX5/LPCAT2/U6/SLC6A2/CES1/18
	11222295	14698071	18	ENSBTAG00000009918/ENSBTAG00000001904/ENSBTAG00000040356	GSE1/ZNF276/SPIRE2
	11598870	20686738	18	ENSBTAG00000009918/ENSBTAG00000001904/ENSBTAG00000040356/ENSBTAG00000004806/ENSBTAG00000052469	GSE1/ZNF276/SPIRE2/PHKB/18
	11685716	15358455	18	ENSBTAG00000001904/ENSBTAG00000040356	ZNF276/SPIRE2
	13346768	28139889	18	ENSBTAG00000001904/ENSBTAG00000040356/ENSBTAG00000004806/ENSBTAG00000052469/ENSBTAG00000002287/ENSBTAG00000004838/ENSBTAG00000019272/ENSBTAG00000051128/ENSBTAG00000003353/ENSBTAG00000011021/ENSBTAG00000001851	ZNF276/SPIRE2/PHKB/18/CHD9/IRX5/LPCAT2/U6/SLC6A2/CES1/18
	15093464	29589079	18	ENSBTAG00000004806/ENSBTAG00000052469/ENSBTAG00000002287/ENSBTAG00000004838/ENSBTAG00000019272/ENSBTAG00000051128/ENSBTAG00000003353/ENSBTAG00000011021/ENSBTAG00000001851	PHKB/18/CHD9/IRX5/LPCAT2/U6/SLC6A2/CES1/18
	15225943	17659879	18	ENSBTAG00000004806	PHKB
	15225943	65978584	18	ENSBTAG00000006999/ENSBTAG00000004806/ENSBTAG00000052469/ENSBTAG00000002287/ENSBTAG00000004838/ENSBTAG00000019272/ENSBTAG00000051128/ENSBTAG00000003353/ENSBTAG00000011021/ENSBTAG00000001851/ENSBTAG00000053222/ENSBTAG00000020251/ENSBTAG00000002412/ENSBTAG00000009493/ENSBTAG00000009494/ENSBTAG00000009495/ENSBTAG00000015318/ENSBTAG00000001781/ENSBTAG00000014187/ENSBTAG00000019604/ENSBTAG00000048511/…	RYR1/PHKB/18/CHD9/IRX5/LPCAT2/U6/SLC6A2/CES1/18/18/LYPD4/CYB5B/BCL3/CBLC/BCAM/NECTIN2/TOMM40/PPM1N/VASP/18/18/FAAP24/BICRA/LRP3/SNRNP70/LIN7B/PPFIA3/TRPM4
	15745432	23196347	18	ENSBTAG00000004806/ENSBTAG00000052469/ENSBTAG00000002287	PHKB/18/CHD9
	16488570	29181633	18	ENSBTAG00000052469/ENSBTAG00000002287/ENSBTAG00000004838/ENSBTAG00000019272/ENSBTAG00000051128/ENSBTAG00000003353/ENSBTAG00000011021/ENSBTAG00000001851	18/CHD9/IRX5/LPCAT2/U6/SLC6A2/CES1/18
	16488570	46641574	18	ENSBTAG00000052469/ENSBTAG00000002287/ENSBTAG00000004838/ENSBTAG00000019272/ENSBTAG00000051128/ENSBTAG00000003353/ENSBTAG00000011021/ENSBTAG00000001851/ENSBTAG00000002412/ENSBTAG00000010403/ENSBTAG00000047062	18/CHD9/IRX5/LPCAT2/U6/SLC6A2/CES1/18/CYB5B/FAAP24/LRP3
	16488570	65454422	18	ENSBTAG00000006999/ENSBTAG00000052469/ENSBTAG00000002287/ENSBTAG00000004838/ENSBTAG00000019272/ENSBTAG00000051128/ENSBTAG00000003353/ENSBTAG00000011021/ENSBTAG00000001851/ENSBTAG00000053222/ENSBTAG00000020251/ENSBTAG00000002412/ENSBTAG00000009493/ENSBTAG00000009494/ENSBTAG00000009495/ENSBTAG00000015318/ENSBTAG00000001781/ENSBTAG00000014187/ENSBTAG00000019604/ENSBTAG00000048511/ENSBTAG00000054677/…	RYR1/18/CHD9/IRX5/LPCAT2/U6/SLC6A2/CES1/18/18/LYPD4/CYB5B/BCL3/CBLC/BCAM/NECTIN2/TOMM40/PPM1N/VASP/18/18/FAAP24/BICRA/LRP3/SNRNP70/LIN7B/PPFIA3/TRPM4
	16809413	23196347	18	ENSBTAG00000052469/ENSBTAG00000002287	18/CHD9
	19173818	24421799	18	ENSBTAG00000002287/ENSBTAG00000004838/ENSBTAG00000019272/ENSBTAG00000051128/ENSBTAG00000003353/ENSBTAG00000011021/ENSBTAG00000001851	CHD9/IRX5/LPCAT2/U6/SLC6A2/CES1/18
	20689048	63054392	18	ENSBTAG00000006999/ENSBTAG00000002287/ENSBTAG00000004838/ENSBTAG00000019272/ENSBTAG00000051128/ENSBTAG00000003353/ENSBTAG00000011021/ENSBTAG00000001851/ENSBTAG00000053222/ENSBTAG00000020251/ENSBTAG00000002412/ENSBTAG00000009493/ENSBTAG00000009494/ENSBTAG00000009495/ENSBTAG00000015318/ENSBTAG00000001781/ENSBTAG00000014187/ENSBTAG00000019604/ENSBTAG00000048511/ENSBTAG00000054677/ENSBTAG00000010403/…	RYR1/CHD9/IRX5/LPCAT2/U6/SLC6A2/CES1/18/18/LYPD4/CYB5B/BCL3/CBLC/BCAM/NECTIN2/TOMM40/PPM1N/VASP/18/18/FAAP24/BICRA/LRP3/SNRNP70/LIN7B/PPFIA3/TRPM4
	22489013	62658789	18	ENSBTAG00000006999/ENSBTAG00000004838/ENSBTAG00000019272/ENSBTAG00000051128/ENSBTAG00000003353/ENSBTAG00000011021/ENSBTAG00000001851/ENSBTAG00000053222/ENSBTAG00000020251/ENSBTAG00000002412/ENSBTAG00000009493/ENSBTAG00000009494/ENSBTAG00000009495/ENSBTAG00000015318/ENSBTAG00000001781/ENSBTAG00000014187/ENSBTAG00000019604/ENSBTAG00000048511/ENSBTAG00000054677/ENSBTAG00000010403/ENSBTAG00000004138/…	RYR1/IRX5/LPCAT2/U6/SLC6A2/CES1/18/18/LYPD4/CYB5B/BCL3/CBLC/BCAM/NECTIN2/TOMM40/PPM1N/VASP/18/18/FAAP24/BICRA/LRP3/SNRNP70/LIN7B/PPFIA3/TRPM4
	23159589	25799434	18	ENSBTAG00000004838/ENSBTAG00000019272/ENSBTAG00000051128/ENSBTAG00000003353/ENSBTAG00000011021/ENSBTAG00000001851	IRX5/LPCAT2/U6/SLC6A2/CES1/18
	23253048	26130014	18	ENSBTAG00000019272/ENSBTAG00000051128/ENSBTAG00000003353/ENSBTAG00000011021/ENSBTAG00000001851	LPCAT2/U6/SLC6A2/CES1/18
	23916486	26315856	18	ENSBTAG00000003353/ENSBTAG00000011021/ENSBTAG00000001851	SLC6A2/CES1/18
	23949849	26844474	18	ENSBTAG00000011021/ENSBTAG00000001851	CES1/18
	29362150	61231528	18	ENSBTAG00000006999/ENSBTAG00000053222/ENSBTAG00000020251/ENSBTAG00000002412/ENSBTAG00000009493/ENSBTAG00000009494/ENSBTAG00000009495/ENSBTAG00000015318/ENSBTAG00000001781/ENSBTAG00000014187/ENSBTAG00000019604/ENSBTAG00000048511/ENSBTAG00000054677/ENSBTAG00000010403/ENSBTAG00000004138/ENSBTAG00000047062/ENSBTAG00000001996/ENSBTAG00000023415/ENSBTAG00000002844/ENSBTAG00000006139	RYR1/18/LYPD4/CYB5B/BCL3/CBLC/BCAM/NECTIN2/TOMM40/PPM1N/VASP/18/18/FAAP24/BICRA/LRP3/SNRNP70/LIN7B/PPFIA3/TRPM4
	33749406	36895563	18	ENSBTAG00000002412	CYB5B
	34243800	46420429	18	ENSBTAG00000002412/ENSBTAG00000010403/ENSBTAG00000047062	CYB5B/FAAP24/LRP3
	40938198	44208859	18	ENSBTAG00000010403/ENSBTAG00000047062	FAAP24/LRP3
	41924327	58386398	18	ENSBTAG00000006999/ENSBTAG00000053222/ENSBTAG00000020251/ENSBTAG00000009493/ENSBTAG00000009494/ENSBTAG00000009495/ENSBTAG00000015318/ENSBTAG00000001781/ENSBTAG00000014187/ENSBTAG00000019604/ENSBTAG00000048511/ENSBTAG00000054677/ENSBTAG00000010403/ENSBTAG00000004138/ENSBTAG00000047062/ENSBTAG00000001996/ENSBTAG00000023415/ENSBTAG00000002844/ENSBTAG00000006139	RYR1/18/LYPD4/BCL3/CBLC/BCAM/NECTIN2/TOMM40/PPM1N/VASP/18/18/FAAP24/BICRA/LRP3/SNRNP70/LIN7B/PPFIA3/TRPM4
	43470260	46264425	18	ENSBTAG00000047062	LRP3
	44427437	53224638	18	ENSBTAG00000006999/ENSBTAG00000053222/ENSBTAG00000020251/ENSBTAG00000009493/ENSBTAG00000009494/ENSBTAG00000009495/ENSBTAG00000015318/ENSBTAG00000001781/ENSBTAG00000014187/ENSBTAG00000019604/ENSBTAG00000048511	RYR1/18/LYPD4/BCL3/CBLC/BCAM/NECTIN2/TOMM40/PPM1N/VASP/18
	46257965	63124270	18	ENSBTAG00000006999/ENSBTAG00000053222/ENSBTAG00000020251/ENSBTAG00000009493/ENSBTAG00000009494/ENSBTAG00000009495/ENSBTAG00000015318/ENSBTAG00000001781/ENSBTAG00000014187/ENSBTAG00000019604/ENSBTAG00000048511/ENSBTAG00000054677/ENSBTAG00000004138/ENSBTAG00000001996/ENSBTAG00000023415/ENSBTAG00000002844/ENSBTAG00000006139	RYR1/18/LYPD4/BCL3/CBLC/BCAM/NECTIN2/TOMM40/PPM1N/VASP/18/18/BICRA/SNRNP70/LIN7B/PPFIA3/TRPM4
	46641574	49690172	18	ENSBTAG00000006999	RYR1
	48150900	51896291	18	ENSBTAG00000006999/ENSBTAG00000053222/ENSBTAG00000020251	RYR1/18/LYPD4
	49332081	51727750	18	ENSBTAG00000053222/ENSBTAG00000020251	18/LYPD4
	50308588	55099575	18	ENSBTAG00000053222/ENSBTAG00000020251/ENSBTAG00000009493/ENSBTAG00000009494/ENSBTAG00000009495/ENSBTAG00000015318/ENSBTAG00000001781/ENSBTAG00000014187/ENSBTAG00000019604/ENSBTAG00000048511/ENSBTAG00000054677/ENSBTAG00000004138	18/LYPD4/BCL3/CBLC/BCAM/NECTIN2/TOMM40/PPM1N/VASP/18/18/BICRA
	50308588	53452847	18	ENSBTAG00000053222/ENSBTAG00000020251/ENSBTAG00000009493/ENSBTAG00000009494/ENSBTAG00000009495/ENSBTAG00000015318/ENSBTAG00000001781/ENSBTAG00000014187/ENSBTAG00000019604/ENSBTAG00000048511	18/LYPD4/BCL3/CBLC/BCAM/NECTIN2/TOMM40/PPM1N/VASP/18
	51703749	54639985	18	ENSBTAG00000009493/ENSBTAG00000009494/ENSBTAG00000009495/ENSBTAG00000015318/ENSBTAG00000001781/ENSBTAG00000014187/ENSBTAG00000019604/ENSBTAG00000048511/ENSBTAG00000054677/ENSBTAG00000004138	BCL3/CBLC/BCAM/NECTIN2/TOMM40/PPM1N/VASP/18/18/BICRA
	52003816	54238497	18	ENSBTAG00000009493/ENSBTAG00000009494/ENSBTAG00000009495/ENSBTAG00000015318/ENSBTAG00000001781/ENSBTAG00000014187/ENSBTAG00000019604/ENSBTAG00000048511	BCL3/CBLC/BCAM/NECTIN2/TOMM40/PPM1N/VASP/18
	52156425	56997601	18	ENSBTAG00000009493/ENSBTAG00000009494/ENSBTAG00000009495/ENSBTAG00000015318/ENSBTAG00000001781/ENSBTAG00000014187/ENSBTAG00000019604/ENSBTAG00000048511/ENSBTAG00000054677/ENSBTAG00000004138/ENSBTAG00000001996/ENSBTAG00000023415/ENSBTAG00000002844/ENSBTAG00000006139	BCL3/CBLC/BCAM/NECTIN2/TOMM40/PPM1N/VASP/18/18/BICRA/SNRNP70/LIN7B/PPFIA3/TRPM4
	52945257	55028139	18	ENSBTAG00000014187/ENSBTAG00000019604/ENSBTAG00000048511/ENSBTAG00000054677/ENSBTAG00000004138	PPM1N/VASP/18/18/BICRA
	53651293	56997601	18	ENSBTAG00000054677/ENSBTAG00000004138/ENSBTAG00000001996/ENSBTAG00000023415/ENSBTAG00000002844/ENSBTAG00000006139	18/BICRA/SNRNP70/LIN7B/PPFIA3/TRPM4
	55442888	58352626	18	ENSBTAG00000001996/ENSBTAG00000023415/ENSBTAG00000002844/ENSBTAG00000006139	SNRNP70/LIN7B/PPFIA3/TRPM4
	55621823	58440805	18	ENSBTAG00000023415/ENSBTAG00000002844/ENSBTAG00000006139	LIN7B/PPFIA3/TRPM4
	103556	57407162	19	ENSBTAG00000053910/ENSBTAG00000015527/ENSBTAG00000021461/ENSBTAG00000021462/ENSBTAG00000010745/ENSBTAG00000016806/ENSBTAG00000000831/ENSBTAG00000025121/ENSBTAG00000032372/ENSBTAG00000055017/ENSBTAG00000045946/ENSBTAG00000031998/ENSBTAG00000018315	C17orf58/MYO1D/PSMD3/CSF3/THRA/PAFAH1B1/CTNS/EMC6/HASPIN/SCIMP/VMO1/CXCL16/PELP1
	103556	64007021	19	ENSBTAG00000053910/ENSBTAG00000015527/ENSBTAG00000021461/ENSBTAG00000021462/ENSBTAG00000010745/ENSBTAG00000016806/ENSBTAG00000000831/ENSBTAG00000025121/ENSBTAG00000032372/ENSBTAG00000055017/ENSBTAG00000045946/ENSBTAG00000031998/ENSBTAG00000018315/ENSBTAG00000002747	C17orf58/MYO1D/PSMD3/CSF3/THRA/PAFAH1B1/CTNS/EMC6/HASPIN/SCIMP/VMO1/CXCL16/PELP1/ABCA5
	12870553	30834957	19	ENSBTAG00000015527/ENSBTAG00000016806/ENSBTAG00000000831/ENSBTAG00000025121/ENSBTAG00000032372/ENSBTAG00000055017/ENSBTAG00000045946/ENSBTAG00000031998/ENSBTAG00000018315	MYO1D/PAFAH1B1/CTNS/EMC6/HASPIN/SCIMP/VMO1/CXCL16/PELP1
	13247857	24812617	19	ENSBTAG00000015527/ENSBTAG00000016806/ENSBTAG00000000831/ENSBTAG00000025121/ENSBTAG00000032372	MYO1D/PAFAH1B1/CTNS/EMC6/HASPIN
	14326037	19637405	19	ENSBTAG00000015527	MYO1D
	16426817	47146055	19	ENSBTAG00000015527/ENSBTAG00000021461/ENSBTAG00000021462/ENSBTAG00000010745/ENSBTAG00000016806/ENSBTAG00000000831/ENSBTAG00000025121/ENSBTAG00000032372/ENSBTAG00000055017/ENSBTAG00000045946/ENSBTAG00000031998/ENSBTAG00000018315	MYO1D/PSMD3/CSF3/THRA/PAFAH1B1/CTNS/EMC6/HASPIN/SCIMP/VMO1/CXCL16/PELP1
	17737370	64007021	19	ENSBTAG00000053910/ENSBTAG00000021461/ENSBTAG00000021462/ENSBTAG00000010745/ENSBTAG00000016806/ENSBTAG00000000831/ENSBTAG00000025121/ENSBTAG00000032372/ENSBTAG00000055017/ENSBTAG00000045946/ENSBTAG00000031998/ENSBTAG00000018315/ENSBTAG00000002747	C17orf58/PSMD3/CSF3/THRA/PAFAH1B1/CTNS/EMC6/HASPIN/SCIMP/VMO1/CXCL16/PELP1/ABCA5
	20293612	24039732	19	ENSBTAG00000016806	PAFAH1B1
	21388415	24812617	19	ENSBTAG00000016806/ENSBTAG00000000831/ENSBTAG00000025121/ENSBTAG00000032372	PAFAH1B1/CTNS/EMC6/HASPIN
	21840791	56775870	19	ENSBTAG00000053910/ENSBTAG00000021461/ENSBTAG00000021462/ENSBTAG00000010745/ENSBTAG00000016806/ENSBTAG00000000831/ENSBTAG00000025121/ENSBTAG00000032372/ENSBTAG00000055017/ENSBTAG00000045946/ENSBTAG00000031998/ENSBTAG00000018315	C17orf58/PSMD3/CSF3/THRA/PAFAH1B1/CTNS/EMC6/HASPIN/SCIMP/VMO1/CXCL16/PELP1
	23477516	27444684	19	ENSBTAG00000016806/ENSBTAG00000000831/ENSBTAG00000025121/ENSBTAG00000032372/ENSBTAG00000055017/ENSBTAG00000045946/ENSBTAG00000031998/ENSBTAG00000018315	PAFAH1B1/CTNS/EMC6/HASPIN/SCIMP/VMO1/CXCL16/PELP1
	24357241	27444684	19	ENSBTAG00000000831/ENSBTAG00000025121/ENSBTAG00000032372/ENSBTAG00000055017/ENSBTAG00000045946/ENSBTAG00000031998/ENSBTAG00000018315	CTNS/EMC6/HASPIN/SCIMP/VMO1/CXCL16/PELP1
	25837047	28450297	19	ENSBTAG00000055017/ENSBTAG00000045946/ENSBTAG00000031998/ENSBTAG00000018315	SCIMP/VMO1/CXCL16/PELP1
	26331593	29811964	19	ENSBTAG00000045946/ENSBTAG00000031998/ENSBTAG00000018315	VMO1/CXCL16/PELP1
	26582764	29235438	19	ENSBTAG00000031998/ENSBTAG00000018315	CXCL16/PELP1
	30174088	64007021	19	ENSBTAG00000053910/ENSBTAG00000021461/ENSBTAG00000021462/ENSBTAG00000010745/ENSBTAG00000002747	C17orf58/PSMD3/CSF3/THRA/ABCA5
	39612914	56775870	19	ENSBTAG00000053910/ENSBTAG00000021461/ENSBTAG00000021462/ENSBTAG00000010745	C17orf58/PSMD3/CSF3/THRA
	39955980	42560642	19	ENSBTAG00000021461/ENSBTAG00000021462/ENSBTAG00000010745	PSMD3/CSF3/THRA
	47457345	64007021	19	ENSBTAG00000053910/ENSBTAG00000002747	C17orf58/ABCA5
	47927722	50250106	19	ENSBTAG00000053910	C17orf58
	61205726	64007021	19	ENSBTAG00000002747	ABCA5
	76307	29522189	20	ENSBTAG00000051954/ENSBTAG00000010526/ENSBTAG00000049683/ENSBTAG00000016002/ENSBTAG00000021606/ENSBTAG00000007704/ENSBTAG00000017026	20/PLPP1/20/FAM169A/ERCC8/ELOVL7/DEPDC1B
	76307	48510710	20	ENSBTAG00000051954/ENSBTAG00000010526/ENSBTAG00000010423/ENSBTAG00000051126/ENSBTAG00000044244/ENSBTAG00000025035/ENSBTAG00000049683/ENSBTAG00000016002/ENSBTAG00000021606/ENSBTAG00000007704/ENSBTAG00000017026	20/PLPP1/LIFR/20/20/PRLR/20/FAM169A/ERCC8/ELOVL7/DEPDC1B
	5955223	27721766	20	ENSBTAG00000051954/ENSBTAG00000010526/ENSBTAG00000016002/ENSBTAG00000021606/ENSBTAG00000007704/ENSBTAG00000017026	20/PLPP1/FAM169A/ERCC8/ELOVL7/DEPDC1B
	5955223	52124199	20	ENSBTAG00000051954/ENSBTAG00000010526/ENSBTAG00000010423/ENSBTAG00000051126/ENSBTAG00000044244/ENSBTAG00000025035/ENSBTAG00000002845/ENSBTAG00000016002/ENSBTAG00000021606/ENSBTAG00000007704/ENSBTAG00000017026	20/PLPP1/LIFR/20/20/PRLR/CDH10/FAM169A/ERCC8/ELOVL7/DEPDC1B
	5955223	71971771	20	ENSBTAG00000051954/ENSBTAG00000010526/ENSBTAG00000010423/ENSBTAG00000051126/ENSBTAG00000044244/ENSBTAG00000025035/ENSBTAG00000002845/ENSBTAG00000049583/ENSBTAG00000032508/ENSBTAG00000052247/ENSBTAG00000016002/ENSBTAG00000021606/ENSBTAG00000007704/ENSBTAG00000017026	20/PLPP1/LIFR/20/20/PRLR/CDH10/20/TAS2R1/TPPP/FAM169A/ERCC8/ELOVL7/DEPDC1B
	5957320	7085388	20	ENSBTAG00000016002	FAM169A
	6123908	21663812	20	ENSBTAG00000016002/ENSBTAG00000021606/ENSBTAG00000007704/ENSBTAG00000017026	FAM169A/ERCC8/ELOVL7/DEPDC1B
	7050201	19067657	20	ENSBTAG00000021606/ENSBTAG00000007704/ENSBTAG00000017026	ERCC8/ELOVL7/DEPDC1B
	7103987	25597446	20	ENSBTAG00000051954/ENSBTAG00000010526/ENSBTAG00000021606/ENSBTAG00000007704/ENSBTAG00000017026	20/PLPP1/ERCC8/ELOVL7/DEPDC1B
	8139619	71971771	20	ENSBTAG00000051954/ENSBTAG00000010526/ENSBTAG00000010423/ENSBTAG00000051126/ENSBTAG00000044244/ENSBTAG00000025035/ENSBTAG00000002845/ENSBTAG00000049583/ENSBTAG00000032508/ENSBTAG00000052247/ENSBTAG00000021606/ENSBTAG00000007704/ENSBTAG00000017026	20/PLPP1/LIFR/20/20/PRLR/CDH10/20/TAS2R1/TPPP/ERCC8/ELOVL7/DEPDC1B
	12603461	58771588	20	ENSBTAG00000051954/ENSBTAG00000010526/ENSBTAG00000010423/ENSBTAG00000051126/ENSBTAG00000044244/ENSBTAG00000025035/ENSBTAG00000002845/ENSBTAG00000021606/ENSBTAG00000007704/ENSBTAG00000017026	20/PLPP1/LIFR/20/20/PRLR/CDH10/ERCC8/ELOVL7/DEPDC1B
	15958456	18537789	20	ENSBTAG00000021606/ENSBTAG00000007704	ERCC8/ELOVL7
	19262754	54896080	20	ENSBTAG00000051954/ENSBTAG00000010526/ENSBTAG00000010423/ENSBTAG00000051126/ENSBTAG00000044244/ENSBTAG00000025035/ENSBTAG00000002845	20/PLPP1/LIFR/20/20/PRLR/CDH10
	21026776	24970604	20	ENSBTAG00000051954/ENSBTAG00000010526	20/PLPP1
	22909055	24266877	20	ENSBTAG00000010526	PLPP1
	24266877	71793734	20	ENSBTAG00000010423/ENSBTAG00000051126/ENSBTAG00000044244/ENSBTAG00000025035/ENSBTAG00000002845/ENSBTAG00000049583/ENSBTAG00000032508/ENSBTAG00000052247	LIFR/20/20/PRLR/CDH10/20/TAS2R1/TPPP
	29054106	68089046	20	ENSBTAG00000010423/ENSBTAG00000051126/ENSBTAG00000044244/ENSBTAG00000025035/ENSBTAG00000002845/ENSBTAG00000049583/ENSBTAG00000032508	LIFR/20/20/PRLR/CDH10/20/TAS2R1
	30928803	59969623	20	ENSBTAG00000010423/ENSBTAG00000051126/ENSBTAG00000044244/ENSBTAG00000025035/ENSBTAG00000002845/ENSBTAG00000049583	LIFR/20/20/PRLR/CDH10/20
	33783791	36398426	20	ENSBTAG00000010423	LIFR
	35812416	40301530	20	ENSBTAG00000010423/ENSBTAG00000051126/ENSBTAG00000044244/ENSBTAG00000025035	LIFR/20/20/PRLR
	35812416	38761711	20	ENSBTAG00000010423/ENSBTAG00000051126/ENSBTAG00000044244	LIFR/20/20
	36336225	38794140	20	ENSBTAG00000051126/ENSBTAG00000044244	20/20
	36336225	39141815	20	ENSBTAG00000051126/ENSBTAG00000044244/ENSBTAG00000025035	20/20/PRLR
	36513431	39017985	20	ENSBTAG00000025035	PRLR
	37808047	52816141	20	ENSBTAG00000025035/ENSBTAG00000002845	PRLR/CDH10
	42235894	71793734	20	ENSBTAG00000002845/ENSBTAG00000049583/ENSBTAG00000032508/ENSBTAG00000052247	CDH10/20/TAS2R1/TPPP
	46812147	49400671	20	ENSBTAG00000002845	CDH10
	48903795	59342623	20	ENSBTAG00000002845/ENSBTAG00000049583	CDH10/20
	51685293	71793734	20	ENSBTAG00000049583/ENSBTAG00000032508/ENSBTAG00000052247	20/TAS2R1/TPPP
	55372193	66898332	20	ENSBTAG00000049583/ENSBTAG00000032508	20/TAS2R1
	59342623	71971771	20	ENSBTAG00000032508/ENSBTAG00000052247	TAS2R1/TPPP
	61941886	63832437	20	ENSBTAG00000032508	TAS2R1
	69167111	71793734	20	ENSBTAG00000052247	TPPP
	38947	32598936	21	ENSBTAG00000015909/ENSBTAG00000006868/ENSBTAG00000006987/ENSBTAG00000049667/ENSBTAG00000049211	PDE8A/OTUD7A/CERS3/21/21
	38947	12814108	21	ENSBTAG00000006987/ENSBTAG00000049667/ENSBTAG00000049211	CERS3/21/21
	38947	41841725	21	ENSBTAG00000015909/ENSBTAG00000006868/ENSBTAG00000049104/ENSBTAG00000000010/ENSBTAG00000011446/ENSBTAG00000006987/ENSBTAG00000049667/ENSBTAG00000049211	PDE8A/OTUD7A/21/UBL7/SEMA7A/CERS3/21/21
	38947	52505118	21	ENSBTAG00000015909/ENSBTAG00000006868/ENSBTAG00000049104/ENSBTAG00000000010/ENSBTAG00000011446/ENSBTAG00000017719/ENSBTAG00000006987/ENSBTAG00000049667/ENSBTAG00000049211	PDE8A/OTUD7A/21/UBL7/SEMA7A/AKAP6/CERS3/21/21
	38947	58692907	21	ENSBTAG00000015909/ENSBTAG00000006868/ENSBTAG00000049104/ENSBTAG00000000010/ENSBTAG00000011446/ENSBTAG00000017719/ENSBTAG00000006987/ENSBTAG00000049667/ENSBTAG00000049211/ENSBTAG00000008017/ENSBTAG00000053709	PDE8A/OTUD7A/21/UBL7/SEMA7A/AKAP6/CERS3/21/21/UNC79/21
	2504481	27211801	21	ENSBTAG00000015909/ENSBTAG00000006987/ENSBTAG00000049667/ENSBTAG00000049211	PDE8A/CERS3/21/21
	2515175	71573501	21	ENSBTAG00000015909/ENSBTAG00000013410/ENSBTAG00000050863/ENSBTAG00000031327/ENSBTAG00000006868/ENSBTAG00000049104/ENSBTAG00000000010/ENSBTAG00000011446/ENSBTAG00000017719/ENSBTAG00000006987/ENSBTAG00000049667/ENSBTAG00000049211/ENSBTAG00000008017/ENSBTAG00000053709/ENSBTAG00000004054/ENSBTAG00000014230	PDE8A/MARK3/21/TRMT61A/OTUD7A/21/UBL7/SEMA7A/AKAP6/CERS3/21/21/UNC79/21/PAPOLA/VRK1
	5821878	8345173	21	ENSBTAG00000006987/ENSBTAG00000049667	CERS3/21
	7644952	52867467	21	ENSBTAG00000015909/ENSBTAG00000006868/ENSBTAG00000049104/ENSBTAG00000000010/ENSBTAG00000011446/ENSBTAG00000017719/ENSBTAG00000049211	PDE8A/OTUD7A/21/UBL7/SEMA7A/AKAP6/21
	9687285	11715137	21	ENSBTAG00000049211
	11010603	40386313	21	ENSBTAG00000015909/ENSBTAG00000006868/ENSBTAG00000049104/ENSBTAG00000000010/ENSBTAG00000011446/ENSBTAG00000049211	PDE8A/OTUD7A/21/UBL7/SEMA7A/21
	15055770	71573501	21	ENSBTAG00000015909/ENSBTAG00000013410/ENSBTAG00000050863/ENSBTAG00000031327/ENSBTAG00000006868/ENSBTAG00000049104/ENSBTAG00000000010/ENSBTAG00000011446/ENSBTAG00000017719/ENSBTAG00000008017/ENSBTAG00000053709/ENSBTAG00000004054/ENSBTAG00000014230	PDE8A/MARK3/21/TRMT61A/OTUD7A/21/UBL7/SEMA7A/AKAP6/UNC79/21/PAPOLA/VRK1
	25036501	59908965	21	ENSBTAG00000006868/ENSBTAG00000049104/ENSBTAG00000000010/ENSBTAG00000011446/ENSBTAG00000017719/ENSBTAG00000008017/ENSBTAG00000053709	OTUD7A/21/UBL7/SEMA7A/AKAP6/UNC79/21
	26447779	30608016	21	ENSBTAG00000006868	OTUD7A
	27087855	52524822	21	ENSBTAG00000006868/ENSBTAG00000049104/ENSBTAG00000000010/ENSBTAG00000011446/ENSBTAG00000017719	OTUD7A/21/UBL7/SEMA7A/AKAP6
	27296213	35809110	21	ENSBTAG00000006868/ENSBTAG00000049104/ENSBTAG00000000010/ENSBTAG00000011446	OTUD7A/21/UBL7/SEMA7A
	28319475	63152155	21	ENSBTAG00000006868/ENSBTAG00000049104/ENSBTAG00000000010/ENSBTAG00000011446/ENSBTAG00000017719/ENSBTAG00000008017/ENSBTAG00000053709/ENSBTAG00000004054/ENSBTAG00000014230	OTUD7A/21/UBL7/SEMA7A/AKAP6/UNC79/21/PAPOLA/VRK1
	31530809	61538452	21	ENSBTAG00000049104/ENSBTAG00000000010/ENSBTAG00000011446/ENSBTAG00000017719/ENSBTAG00000008017/ENSBTAG00000053709/ENSBTAG00000004054	21/UBL7/SEMA7A/AKAP6/UNC79/21/PAPOLA
	32785005	60195812	21	ENSBTAG00000049104/ENSBTAG00000000010/ENSBTAG00000011446/ENSBTAG00000017719/ENSBTAG00000008017/ENSBTAG00000053709	21/UBL7/SEMA7A/AKAP6/UNC79/21
	32811807	35640578	21	ENSBTAG00000049104/ENSBTAG00000000010/ENSBTAG00000011446	21/UBL7/SEMA7A
	34200294	35999673	21	ENSBTAG00000000010/ENSBTAG00000011446	UBL7/SEMA7A
	40072235	43096903	21	ENSBTAG00000017719	AKAP6
	40449117	71573501	21	ENSBTAG00000013410/ENSBTAG00000050863/ENSBTAG00000031327/ENSBTAG00000017719/ENSBTAG00000008017/ENSBTAG00000053709/ENSBTAG00000004054/ENSBTAG00000014230	MARK3/21/TRMT61A/AKAP6/UNC79/21/PAPOLA/VRK1
	42629383	63558784	21	ENSBTAG00000017719/ENSBTAG00000008017/ENSBTAG00000053709/ENSBTAG00000004054/ENSBTAG00000014230	AKAP6/UNC79/21/PAPOLA/VRK1
	52554932	64176804	21	ENSBTAG00000008017/ENSBTAG00000053709/ENSBTAG00000004054/ENSBTAG00000014230	UNC79/21/PAPOLA/VRK1
	52583651	71573501	21	ENSBTAG00000013410/ENSBTAG00000050863/ENSBTAG00000031327/ENSBTAG00000008017/ENSBTAG00000053709/ENSBTAG00000004054/ENSBTAG00000014230	MARK3/21/TRMT61A/UNC79/21/PAPOLA/VRK1
	56634361	59875525	21	ENSBTAG00000008017/ENSBTAG00000053709	UNC79/21
	60553762	71136925	21	ENSBTAG00000013410/ENSBTAG00000050863/ENSBTAG00000031327/ENSBTAG00000004054/ENSBTAG00000014230	MARK3/21/TRMT61A/PAPOLA/VRK1
	60989733	63178211	21	ENSBTAG00000004054/ENSBTAG00000014230	PAPOLA/VRK1
	67088847	69222948	21	ENSBTAG00000013410/ENSBTAG00000050863/ENSBTAG00000031327	MARK3/21/TRMT61A
	68152356	71136925	21	ENSBTAG00000050863/ENSBTAG00000031327	21/TRMT61A
	33484	3531698	22	ENSBTAG00000022751	ZCWPW2
	33484	4075193	22	ENSBTAG00000022751/ENSBTAG00000044062	ZCWPW2/RBMS3
	3700615	18521113	22	ENSBTAG00000044062/ENSBTAG00000049450/ENSBTAG00000007732/ENSBTAG00000015483/ENSBTAG00000015493/ENSBTAG00000022721/ENSBTAG00000009760/ENSBTAG00000009757/ENSBTAG00000042226/ENSBTAG00000042875/ENSBTAG00000006567	RBMS3/bta-mir-11990/ARPP21/CCR8/22/SLC25A38/22/RPSA/SNORA62/SNORA62/VIPR1
	3700615	30894155	22	ENSBTAG00000044062/ENSBTAG00000049450/ENSBTAG00000007732/ENSBTAG00000015483/ENSBTAG00000015493/ENSBTAG00000022721/ENSBTAG00000009760/ENSBTAG00000009757/ENSBTAG00000042226/ENSBTAG00000042875/ENSBTAG00000006567/ENSBTAG00000052598/ENSBTAG00000000273/ENSBTAG00000045059/ENSBTAG00000006727/ENSBTAG00000052330	RBMS3/bta-mir-11990/ARPP21/CCR8/22/SLC25A38/22/RPSA/SNORA62/SNORA62/VIPR1/U6/IL5RA/U6/22/22
	4226071	5448260	22	ENSBTAG00000044062	RBMS3
	4226071	10684294	22	ENSBTAG00000044062/ENSBTAG00000007732	RBMS3/ARPP21
	4514702	31729868	22	ENSBTAG00000044062/ENSBTAG00000007732/ENSBTAG00000015483/ENSBTAG00000015493/ENSBTAG00000022721/ENSBTAG00000009760/ENSBTAG00000009757/ENSBTAG00000042226/ENSBTAG00000042875/ENSBTAG00000006567/ENSBTAG00000052598/ENSBTAG00000000273/ENSBTAG00000045059/ENSBTAG00000006727/ENSBTAG00000052330	RBMS3/ARPP21/CCR8/22/SLC25A38/22/RPSA/SNORA62/SNORA62/VIPR1/U6/IL5RA/U6/22/22
	5051642	31610223	22	ENSBTAG00000007732/ENSBTAG00000015483/ENSBTAG00000015493/ENSBTAG00000022721/ENSBTAG00000009760/ENSBTAG00000009757/ENSBTAG00000042226/ENSBTAG00000042875/ENSBTAG00000006567/ENSBTAG00000052598/ENSBTAG00000000273/ENSBTAG00000045059/ENSBTAG00000006727/ENSBTAG00000052330	ARPP21/CCR8/22/SLC25A38/22/RPSA/SNORA62/SNORA62/VIPR1/U6/IL5RA/U6/22/22
	5183409	41825294	22	ENSBTAG00000007732/ENSBTAG00000015483/ENSBTAG00000015493/ENSBTAG00000022721/ENSBTAG00000009760/ENSBTAG00000009757/ENSBTAG00000042226/ENSBTAG00000042875/ENSBTAG00000006567/ENSBTAG00000052598/ENSBTAG00000000273/ENSBTAG00000045059/ENSBTAG00000006727/ENSBTAG00000052330/ENSBTAG00000010360/ENSBTAG00000051201/ENSBTAG00000014418	ARPP21/CCR8/22/SLC25A38/22/RPSA/SNORA62/SNORA62/VIPR1/U6/IL5RA/U6/22/22/LRIG1/22/FHIT
	13012930	31985444	22	ENSBTAG00000006567/ENSBTAG00000052598/ENSBTAG00000000273/ENSBTAG00000045059/ENSBTAG00000006727/ENSBTAG00000052330	VIPR1/U6/IL5RA/U6/22/22
	14086186	27734355	22	ENSBTAG00000006567/ENSBTAG00000052598/ENSBTAG00000000273/ENSBTAG00000045059/ENSBTAG00000006727	VIPR1/U6/IL5RA/U6/22
	14251082	47377378	22	ENSBTAG00000006567/ENSBTAG00000052598/ENSBTAG00000000273/ENSBTAG00000045059/ENSBTAG00000006727/ENSBTAG00000052330/ENSBTAG00000010360/ENSBTAG00000051201/ENSBTAG00000014418	VIPR1/U6/IL5RA/U6/22/22/LRIG1/22/FHIT
	14437598	18358528	22	ENSBTAG00000006567	VIPR1
	15755312	35363041	22	ENSBTAG00000052598/ENSBTAG00000000273/ENSBTAG00000045059/ENSBTAG00000006727/ENSBTAG00000052330/ENSBTAG00000010360/ENSBTAG00000051201	U6/IL5RA/U6/22/22/LRIG1/22
	17736238	24078956	22	ENSBTAG00000052598/ENSBTAG00000000273	U6/IL5RA
	18798468	33232278	22	ENSBTAG00000052598/ENSBTAG00000000273/ENSBTAG00000045059/ENSBTAG00000006727/ENSBTAG00000052330	U6/IL5RA/U6/22/22
	18921591	27713645	22	ENSBTAG00000052598/ENSBTAG00000000273/ENSBTAG00000045059/ENSBTAG00000006727	U6/IL5RA/U6/22
	31880472	35363041	22	ENSBTAG00000010360/ENSBTAG00000051201	LRIG1/22
	31880472	47365483	22	ENSBTAG00000010360/ENSBTAG00000051201/ENSBTAG00000014418	LRIG1/22/FHIT
	54212982	61378199	22	ENSBTAG00000024991/ENSBTAG00000053422/ENSBTAG00000003237	MKRN2OS/22/IQSEC1
	55365371	57619786	22	ENSBTAG00000024991	MKRN2OS
	57253436	61378199	22	ENSBTAG00000053422/ENSBTAG00000003237	22/IQSEC1
	58748602	61378199	22	ENSBTAG00000003237	IQSEC1
	15894	20024769	23	ENSBTAG00000047009/ENSBTAG00000004345/ENSBTAG00000016890/ENSBTAG00000013316/ENSBTAG00000015118	ANKRD66/MEP1A/ANKS1A/BRPF3/PNPLA1
	6999212	9617524	23	ENSBTAG00000016890	ANKS1A
	7603033	10167082	23	ENSBTAG00000016890/ENSBTAG00000013316	ANKS1A/BRPF3
	8513266	11438802	23	ENSBTAG00000016890/ENSBTAG00000013316/ENSBTAG00000015118	ANKS1A/BRPF3/PNPLA1
	9346877	11599932	23	ENSBTAG00000013316/ENSBTAG00000015118	BRPF3/PNPLA1
	9904740	20692320	23	ENSBTAG00000047009/ENSBTAG00000004345/ENSBTAG00000013316/ENSBTAG00000015118	ANKRD66/MEP1A/BRPF3/PNPLA1
	14756959	20166517	23	ENSBTAG00000047009/ENSBTAG00000004345	ANKRD66/MEP1A
	16021555	52285248	23	ENSBTAG00000048460/ENSBTAG00000005248/ENSBTAG00000047009/ENSBTAG00000004345/ENSBTAG00000011358/ENSBTAG00000009960/ENSBTAG00000025526/ENSBTAG00000006966/ENSBTAG00000039695/ENSBTAG00000006960	23/23/ANKRD66/MEP1A/IER3/FLOT1/MDC1/NRM/PPP1R18/DHX16
	18070897	34809116	23	ENSBTAG00000047009/ENSBTAG00000004345/ENSBTAG00000011358/ENSBTAG00000009960/ENSBTAG00000025526/ENSBTAG00000006966/ENSBTAG00000039695/ENSBTAG00000006960	ANKRD66/MEP1A/IER3/FLOT1/MDC1/NRM/PPP1R18/DHX16
	27759950	34758497	23	ENSBTAG00000011358/ENSBTAG00000009960/ENSBTAG00000025526/ENSBTAG00000006966/ENSBTAG00000039695/ENSBTAG00000006960	IER3/FLOT1/MDC1/NRM/PPP1R18/DHX16
	17179801	29553275	24	ENSBTAG00000015238	DSC3
	19185484	35274061	24	ENSBTAG00000015238/ENSBTAG00000049720/ENSBTAG00000014082/ENSBTAG00000000517	DSC3/U6/CHST9/ANKRD29
	24873093	42582505	24	ENSBTAG00000015238/ENSBTAG00000049720/ENSBTAG00000014082/ENSBTAG00000000517/ENSBTAG00000003354/ENSBTAG00000051502	DSC3/U6/CHST9/ANKRD29/SMCHD1/24
	26417867	60298391	24	ENSBTAG00000018901/ENSBTAG00000049363/ENSBTAG00000004005/ENSBTAG00000049720/ENSBTAG00000014082/ENSBTAG00000000517/ENSBTAG00000003354/ENSBTAG00000051502	CTIF/24/WDR7/U6/CHST9/ANKRD29/SMCHD1/24
	26419541	49794284	24	ENSBTAG00000018901/ENSBTAG00000049363/ENSBTAG00000049720/ENSBTAG00000014082/ENSBTAG00000000517/ENSBTAG00000003354/ENSBTAG00000051502	CTIF/24/U6/CHST9/ANKRD29/SMCHD1/24
	26769260	35167886	24	ENSBTAG00000049720/ENSBTAG00000014082/ENSBTAG00000000517	U6/CHST9/ANKRD29
	29450475	32428439	24	ENSBTAG00000049720/ENSBTAG00000014082	U6/CHST9
	29792032	35649493	24	ENSBTAG00000014082/ENSBTAG00000000517	CHST9/ANKRD29
	30265281	38307677	24	ENSBTAG00000000517/ENSBTAG00000003354	ANKRD29/SMCHD1
	30411481	34410501	24	ENSBTAG00000000517	ANKRD29
	33904918	46027109	24	ENSBTAG00000003354/ENSBTAG00000051502	SMCHD1/24
	34248516	50640590	24	ENSBTAG00000018901/ENSBTAG00000049363/ENSBTAG00000003354/ENSBTAG00000051502	CTIF/24/SMCHD1/24
	35056278	38347278	24	ENSBTAG00000003354	SMCHD1
	35899236	62685898	24	ENSBTAG00000018901/ENSBTAG00000049363/ENSBTAG00000004005/ENSBTAG00000003354/ENSBTAG00000051502	CTIF/24/WDR7/SMCHD1/24
	38310286	62643699	24	ENSBTAG00000018901/ENSBTAG00000049363/ENSBTAG00000004005/ENSBTAG00000051502	CTIF/24/WDR7/24
	41413422	51119946	24	ENSBTAG00000018901/ENSBTAG00000049363/ENSBTAG00000051502	CTIF/24/24
	45871107	48649157	24	ENSBTAG00000018901/ENSBTAG00000049363	CTIF/24
	55592754	57984297	24	ENSBTAG00000004005	WDR7
	47181	15151658	25	ENSBTAG00000026422/ENSBTAG00000038921/ENSBTAG00000034024/ENSBTAG00000038757/ENSBTAG00000051412/ENSBTAG00000054844/ENSBTAG00000016567/ENSBTAG00000002189/ENSBTAG00000049285/ENSBTAG00000026371	MPG/25/25/HBM/HBA/25/HBQ1/ALG1/TNFRSF17/SNX29
	47181	18872215	25	ENSBTAG00000026422/ENSBTAG00000038921/ENSBTAG00000034024/ENSBTAG00000038757/ENSBTAG00000051412/ENSBTAG00000054844/ENSBTAG00000016567/ENSBTAG00000002189/ENSBTAG00000049285/ENSBTAG00000026371/ENSBTAG00000005523	MPG/25/25/HBM/HBA/25/HBQ1/ALG1/TNFRSF17/SNX29/XYLT1
	47181	24541231	25	ENSBTAG00000043717/ENSBTAG00000054747/ENSBTAG00000026422/ENSBTAG00000038921/ENSBTAG00000034024/ENSBTAG00000038757/ENSBTAG00000051412/ENSBTAG00000054844/ENSBTAG00000016567/ENSBTAG00000002189/ENSBTAG00000049285/ENSBTAG00000026371/ENSBTAG00000005523	25/25/MPG/25/25/HBM/HBA/25/HBQ1/ALG1/TNFRSF17/SNX29/XYLT1
	47181	42851121	25	ENSBTAG00000043717/ENSBTAG00000054747/ENSBTAG00000051235/ENSBTAG00000006542/ENSBTAG00000026422/ENSBTAG00000038921/ENSBTAG00000034024/ENSBTAG00000038757/ENSBTAG00000051412/ENSBTAG00000054844/ENSBTAG00000016567/ENSBTAG00000005798/ENSBTAG00000017941/ENSBTAG00000044875/ENSBTAG00000002189/ENSBTAG00000000342/ENSBTAG00000047808/ENSBTAG00000048401/ENSBTAG00000009868/ENSBTAG00000049285/ENSBTAG00000026371/…	25/25/25/RABEP2/MPG/25/25/HBM/HBA/25/HBQ1/TRIM50/NSUN5/U6/ALG1/PLOD3/MOGAT3/25/VGF/TNFRSF17/SNX29/FAM200A/ZNF789/25/ZNF394/ATP5MF/XYLT1/bta-mir-2390/bta-mir-12019
	104438	1864761	25	ENSBTAG00000026422/ENSBTAG00000038921/ENSBTAG00000034024/ENSBTAG00000038757/ENSBTAG00000051412/ENSBTAG00000054844/ENSBTAG00000016567	MPG/25/25/HBM/HBA/25/HBQ1
	104438	4514909	25	ENSBTAG00000026422/ENSBTAG00000038921/ENSBTAG00000034024/ENSBTAG00000038757/ENSBTAG00000051412/ENSBTAG00000054844/ENSBTAG00000016567/ENSBTAG00000002189	MPG/25/25/HBM/HBA/25/HBQ1/ALG1
	237319	15817521	25	ENSBTAG00000002189/ENSBTAG00000049285/ENSBTAG00000026371/ENSBTAG00000005523	ALG1/TNFRSF17/SNX29/XYLT1
	2880252	5948405	25	ENSBTAG00000002189	ALG1
	11885927	15722466	25	ENSBTAG00000005523	XYLT1
	12927936	26032901	25	ENSBTAG00000043717/ENSBTAG00000054747/ENSBTAG00000051235/ENSBTAG00000006542/ENSBTAG00000005523	25/25/25/RABEP2/XYLT1
	19082329	42851121	25	ENSBTAG00000043717/ENSBTAG00000054747/ENSBTAG00000051235/ENSBTAG00000006542/ENSBTAG00000005798/ENSBTAG00000017941/ENSBTAG00000044875/ENSBTAG00000000342/ENSBTAG00000047808/ENSBTAG00000048401/ENSBTAG00000009868/ENSBTAG00000051481/ENSBTAG00000047572/ENSBTAG00000048341/ENSBTAG00000016190/ENSBTAG00000002094/ENSBTAG00000052780/ENSBTAG00000052079	25/25/25/RABEP2/TRIM50/NSUN5/U6/PLOD3/MOGAT3/25/VGF/FAM200A/ZNF789/25/ZNF394/ATP5MF/bta-mir-2390/bta-mir-12019
	19173921	26669633	25	ENSBTAG00000043717/ENSBTAG00000054747/ENSBTAG00000051235/ENSBTAG00000006542	25/25/25/RABEP2
	20398199	24565008	25	ENSBTAG00000043717/ENSBTAG00000054747	25/25
	22166475	37670373	25	ENSBTAG00000051235/ENSBTAG00000006542/ENSBTAG00000005798/ENSBTAG00000017941/ENSBTAG00000044875/ENSBTAG00000000342/ENSBTAG00000047808/ENSBTAG00000048401/ENSBTAG00000009868/ENSBTAG00000051481/ENSBTAG00000047572/ENSBTAG00000048341/ENSBTAG00000016190/ENSBTAG00000002094	25/RABEP2/TRIM50/NSUN5/U6/PLOD3/MOGAT3/25/VGF/FAM200A/ZNF789/25/ZNF394/ATP5MF
	22494422	35853810	25	ENSBTAG00000051235/ENSBTAG00000006542/ENSBTAG00000005798/ENSBTAG00000017941/ENSBTAG00000044875/ENSBTAG00000000342/ENSBTAG00000047808/ENSBTAG00000048401/ENSBTAG00000009868	25/RABEP2/TRIM50/NSUN5/U6/PLOD3/MOGAT3/25/VGF
	23884287	42851121	25	ENSBTAG00000051235/ENSBTAG00000006542/ENSBTAG00000005798/ENSBTAG00000017941/ENSBTAG00000044875/ENSBTAG00000000342/ENSBTAG00000047808/ENSBTAG00000048401/ENSBTAG00000009868/ENSBTAG00000051481/ENSBTAG00000047572/ENSBTAG00000048341/ENSBTAG00000016190/ENSBTAG00000002094/ENSBTAG00000052780/ENSBTAG00000052079	25/RABEP2/TRIM50/NSUN5/U6/PLOD3/MOGAT3/25/VGF/FAM200A/ZNF789/25/ZNF394/ATP5MF/bta-mir-2390/bta-mir-12019
	25035637	35429971	25	ENSBTAG00000051235/ENSBTAG00000006542/ENSBTAG00000005798/ENSBTAG00000017941/ENSBTAG00000044875	25/RABEP2/TRIM50/NSUN5/U6
	25337531	28449472	25	ENSBTAG00000051235/ENSBTAG00000006542	25/RABEP2
	25876171	28372023	25	ENSBTAG00000006542	RABEP2
	26055096	42851121	25	ENSBTAG00000005798/ENSBTAG00000017941/ENSBTAG00000044875/ENSBTAG00000000342/ENSBTAG00000047808/ENSBTAG00000048401/ENSBTAG00000009868/ENSBTAG00000051481/ENSBTAG00000047572/ENSBTAG00000048341/ENSBTAG00000016190/ENSBTAG00000002094/ENSBTAG00000052780/ENSBTAG00000052079	TRIM50/NSUN5/U6/PLOD3/MOGAT3/25/VGF/FAM200A/ZNF789/25/ZNF394/ATP5MF/bta-mir-2390/bta-mir-12019
	36918646	41523769	25	ENSBTAG00000016190/ENSBTAG00000002094/ENSBTAG00000052780/ENSBTAG00000052079	ZNF394/ATP5MF/bta-mir-2390/bta-mir-12019
	37927752	40341603	25	ENSBTAG00000052780	bta-mir-2390
	39066743	41450464	25	ENSBTAG00000052780/ENSBTAG00000052079	bta-mir-2390/bta-mir-12019
	40851475	42640462	25	ENSBTAG00000052079	bta-mir-12019
	97421	51680135	26	ENSBTAG00000031890/ENSBTAG00000050386/ENSBTAG00000054930/ENSBTAG00000045905/ENSBTAG00000042971/ENSBTAG00000011651/ENSBTAG00000020981/ENSBTAG00000001017/ENSBTAG00000006860/ENSBTAG00000003062	DOCK1/MGMT/26/PCDH15/U6/HECTD2/MARCHF5/SLK/VWA2/FAM160B1
	132614	5483737	26	ENSBTAG00000045905	PCDH15
	132614	12238856	26	ENSBTAG00000045905/ENSBTAG00000042971	PCDH15/U6
	4665972	32010478	26	ENSBTAG00000045905/ENSBTAG00000042971/ENSBTAG00000011651/ENSBTAG00000020981/ENSBTAG00000001017	PCDH15/U6/HECTD2/MARCHF5/SLK
	4840609	47932408	26	ENSBTAG00000031890/ENSBTAG00000045905/ENSBTAG00000042971/ENSBTAG00000011651/ENSBTAG00000020981/ENSBTAG00000001017/ENSBTAG00000006860/ENSBTAG00000003062	DOCK1/PCDH15/U6/HECTD2/MARCHF5/SLK/VWA2/FAM160B1
	4972470	14503219	26	ENSBTAG00000045905/ENSBTAG00000042971/ENSBTAG00000011651/ENSBTAG00000020981	PCDH15/U6/HECTD2/MARCHF5
	6817634	27173269	26	ENSBTAG00000011651/ENSBTAG00000020981/ENSBTAG00000001017	HECTD2/MARCHF5/SLK
	6854599	47932408	26	ENSBTAG00000031890/ENSBTAG00000011651/ENSBTAG00000020981/ENSBTAG00000001017/ENSBTAG00000006860/ENSBTAG00000003062	DOCK1/HECTD2/MARCHF5/SLK/VWA2/FAM160B1
	36761215	47957153	26	ENSBTAG00000031890	DOCK1
	44120284	51181758	26	ENSBTAG00000031890/ENSBTAG00000050386/ENSBTAG00000054930	DOCK1/MGMT/26
	48447574	51680135	26	ENSBTAG00000050386/ENSBTAG00000054930	MGMT/26
	18888	45388171	27	ENSBTAG00000005825/ENSBTAG00000053762/ENSBTAG00000013581/ENSBTAG00000027118/ENSBTAG00000007634/ENSBTAG00000003201/ENSBTAG00000004613/ENSBTAG00000017802	NEIL3/27/LEPROTL1/KCNU1/HOOK3/FNTA/CSGALNACT1/THRB
	36664	27402645	27	ENSBTAG00000005825/ENSBTAG00000053762/ENSBTAG00000013581	NEIL3/27/LEPROTL1
	36664	22936249	27	ENSBTAG00000005825	NEIL3
	36664	35057301	27	ENSBTAG00000005825/ENSBTAG00000053762/ENSBTAG00000013581/ENSBTAG00000027118	NEIL3/27/LEPROTL1/KCNU1
	22448445	45368987	27	ENSBTAG00000053762/ENSBTAG00000013581/ENSBTAG00000027118/ENSBTAG00000007634/ENSBTAG00000003201/ENSBTAG00000004613/ENSBTAG00000017802	27/LEPROTL1/KCNU1/HOOK3/FNTA/CSGALNACT1/THRB
	24080125	26602230	27	ENSBTAG00000053762/ENSBTAG00000013581	27/LEPROTL1
	24361908	36054950	27	ENSBTAG00000053762/ENSBTAG00000013581/ENSBTAG00000027118	27/LEPROTL1/KCNU1
	29133451	45368987	27	ENSBTAG00000027118/ENSBTAG00000007634/ENSBTAG00000003201/ENSBTAG00000004613/ENSBTAG00000017802	KCNU1/HOOK3/FNTA/CSGALNACT1/THRB
	30510177	33715201	27	ENSBTAG00000027118	KCNU1
	35261116	37723332	27	ENSBTAG00000007634/ENSBTAG00000003201	HOOK3/FNTA
	35985713	38522773	27	ENSBTAG00000007634/ENSBTAG00000003201/ENSBTAG00000004613	HOOK3/FNTA/CSGALNACT1
	36433735	45368987	27	ENSBTAG00000007634/ENSBTAG00000003201/ENSBTAG00000004613/ENSBTAG00000017802	HOOK3/FNTA/CSGALNACT1/THRB
	37767563	45388171	27	ENSBTAG00000004613/ENSBTAG00000017802	CSGALNACT1/THRB
	40973802	42927083	27	ENSBTAG00000017802	THRB
	5302	46224056	28	ENSBTAG00000051862/ENSBTAG00000007876/ENSBTAG00000020361/ENSBTAG00000042238/ENSBTAG00000013735	ZNF37A/MAPK8/SLC35F3/28/TBCE
	41088	14651368	28	ENSBTAG00000051862/ENSBTAG00000020361/ENSBTAG00000042238/ENSBTAG00000013735	ZNF37A/SLC35F3/28/TBCE
	2233574	12361124	28	ENSBTAG00000020361/ENSBTAG00000042238/ENSBTAG00000013735	SLC35F3/28/TBCE
	7795053	10127554	28	ENSBTAG00000013735	TBCE
	7874740	14571127	28	ENSBTAG00000051862/ENSBTAG00000013735	ZNF37A/TBCE
	8380329	14571127	28	ENSBTAG00000051862	ZNF37A
	8380329	42806832	28	ENSBTAG00000051862/ENSBTAG00000007876	ZNF37A/MAPK8
	42617112	44261945	28	ENSBTAG00000007876	MAPK8
	108487	9776159	29	ENSBTAG00000000460	SYTL2
	108487	14009294	29	ENSBTAG00000000460/ENSBTAG00000000457/ENSBTAG00000027868/ENSBTAG00000002417	SYTL2/CCDC89/DLG2/RAB30
	4593932	35329572	29	ENSBTAG00000000460/ENSBTAG00000000457/ENSBTAG00000027868/ENSBTAG00000002417/ENSBTAG00000017446/ENSBTAG00000020257/ENSBTAG00000001660	SYTL2/CCDC89/DLG2/RAB30/E2F8/PTPN5/SPTY2D1
	17876279	48809184	29	ENSBTAG00000001077/ENSBTAG00000039129/ENSBTAG00000042284/ENSBTAG00000007108/ENSBTAG00000011019/ENSBTAG00000017446/ENSBTAG00000020257/ENSBTAG00000001660	OSBPL5/29/U6/LGALS12/29/E2F8/PTPN5/SPTY2D1
	23411243	25946679	29	ENSBTAG00000017446	E2F8
	48664408	94998936	1	ENSBTAG00000012467/ENSBTAG00000014727/ENSBTAG00000007666/ENSBTAG00000021910/ENSBTAG00000012646/ENSBTAG00000001209/ENSBTAG00000009014/ENSBTAG00000005071/ENSBTAG00000044700/ENSBTAG00000002640/ENSBTAG00000006388/ENSBTAG00000023600/ENSBTAG00000006724/ENSBTAG00000002394/ENSBTAG00000016305/ENSBTAG00000054354/ENSBTAG00000012413	MASP1/RFC4/IGF2BP2/TBL1XR1/PLCXD2/PHLDB2/UPK1B/SLC49A4/U4/KALRN/FBXO45/APOD/PPP1R2/TMEM44/ATP13A4/bta-mir-2285bk/FGF12
	50465233	85671043	1	ENSBTAG00000012467/ENSBTAG00000014727/ENSBTAG00000007666/ENSBTAG00000012646/ENSBTAG00000001209/ENSBTAG00000009014/ENSBTAG00000005071/ENSBTAG00000044700/ENSBTAG00000002640/ENSBTAG00000006388/ENSBTAG00000023600/ENSBTAG00000006724/ENSBTAG00000002394/ENSBTAG00000016305/ENSBTAG00000054354/ENSBTAG00000012413	MASP1/RFC4/IGF2BP2/PLCXD2/PHLDB2/UPK1B/SLC49A4/U4/KALRN/FBXO45/APOD/PPP1R2/TMEM44/ATP13A4/bta-mir-2285bk/FGF12
	52979497	56706072	1	ENSBTAG00000012646/ENSBTAG00000001209	PLCXD2/PHLDB2
	53238076	74253662	1	ENSBTAG00000012646/ENSBTAG00000001209/ENSBTAG00000009014/ENSBTAG00000005071/ENSBTAG00000044700/ENSBTAG00000002640/ENSBTAG00000006388/ENSBTAG00000023600/ENSBTAG00000006724/ENSBTAG00000002394/ENSBTAG00000016305/ENSBTAG00000054354	PLCXD2/PHLDB2/UPK1B/SLC49A4/U4/KALRN/FBXO45/APOD/PPP1R2/TMEM44/ATP13A4/bta-mir-2285bk
	56669858	76331663	1	ENSBTAG00000001209/ENSBTAG00000009014/ENSBTAG00000005071/ENSBTAG00000044700/ENSBTAG00000002640/ENSBTAG00000006388/ENSBTAG00000023600/ENSBTAG00000006724/ENSBTAG00000002394/ENSBTAG00000016305/ENSBTAG00000054354/ENSBTAG00000012413	PHLDB2/UPK1B/SLC49A4/U4/KALRN/FBXO45/APOD/PPP1R2/TMEM44/ATP13A4/bta-mir-2285bk/FGF12
	60700652	85731453	1	ENSBTAG00000012467/ENSBTAG00000014727/ENSBTAG00000007666/ENSBTAG00000009014/ENSBTAG00000005071/ENSBTAG00000044700/ENSBTAG00000002640/ENSBTAG00000006388/ENSBTAG00000023600/ENSBTAG00000006724/ENSBTAG00000002394/ENSBTAG00000016305/ENSBTAG00000054354/ENSBTAG00000012413	MASP1/RFC4/IGF2BP2/UPK1B/SLC49A4/U4/KALRN/FBXO45/APOD/PPP1R2/TMEM44/ATP13A4/bta-mir-2285bk/FGF12
	61450475	123418905	1	ENSBTAG00000012467/ENSBTAG00000014727/ENSBTAG00000007666/ENSBTAG00000021910/ENSBTAG00000005230/ENSBTAG00000009014/ENSBTAG00000005071/ENSBTAG00000044700/ENSBTAG00000002640/ENSBTAG00000006388/ENSBTAG00000023600/ENSBTAG00000006724/ENSBTAG00000002394/ENSBTAG00000016305/ENSBTAG00000054354/ENSBTAG00000012413	MASP1/RFC4/IGF2BP2/TBL1XR1/SHOX2/UPK1B/SLC49A4/U4/KALRN/FBXO45/APOD/PPP1R2/TMEM44/ATP13A4/bta-mir-2285bk/FGF12
	61900596	64955929	1	ENSBTAG00000009014	UPK1B
	62056267	71800147	1	ENSBTAG00000009014/ENSBTAG00000005071/ENSBTAG00000044700/ENSBTAG00000002640/ENSBTAG00000006388	UPK1B/SLC49A4/U4/KALRN/FBXO45
	62056267	95067819	1	ENSBTAG00000012467/ENSBTAG00000014727/ENSBTAG00000007666/ENSBTAG00000021910/ENSBTAG00000009014/ENSBTAG00000005071/ENSBTAG00000044700/ENSBTAG00000002640/ENSBTAG00000006388/ENSBTAG00000023600/ENSBTAG00000006724/ENSBTAG00000002394/ENSBTAG00000016305/ENSBTAG00000054354/ENSBTAG00000012413	MASP1/RFC4/IGF2BP2/TBL1XR1/UPK1B/SLC49A4/U4/KALRN/FBXO45/APOD/PPP1R2/TMEM44/ATP13A4/bta-mir-2285bk/FGF12
	63277846	75433980	1	ENSBTAG00000009014/ENSBTAG00000005071/ENSBTAG00000044700/ENSBTAG00000002640/ENSBTAG00000006388/ENSBTAG00000023600/ENSBTAG00000006724/ENSBTAG00000002394/ENSBTAG00000016305/ENSBTAG00000054354/ENSBTAG00000012413	UPK1B/SLC49A4/U4/KALRN/FBXO45/APOD/PPP1R2/TMEM44/ATP13A4/bta-mir-2285bk/FGF12
	64286866	67212088	1	ENSBTAG00000005071	SLC49A4
	66976165	73182063	1	ENSBTAG00000005071/ENSBTAG00000044700/ENSBTAG00000002640/ENSBTAG00000006388/ENSBTAG00000023600/ENSBTAG00000006724/ENSBTAG00000002394	SLC49A4/U4/KALRN/FBXO45/APOD/PPP1R2/TMEM44
	67286095	74917513	1	ENSBTAG00000044700/ENSBTAG00000002640/ENSBTAG00000006388/ENSBTAG00000023600/ENSBTAG00000006724/ENSBTAG00000002394/ENSBTAG00000016305/ENSBTAG00000054354/ENSBTAG00000012413	U4/KALRN/FBXO45/APOD/PPP1R2/TMEM44/ATP13A4/bta-mir-2285bk/FGF12
	69821698	92331878	1	ENSBTAG00000012467/ENSBTAG00000014727/ENSBTAG00000007666/ENSBTAG00000021910/ENSBTAG00000006388/ENSBTAG00000023600/ENSBTAG00000006724/ENSBTAG00000002394/ENSBTAG00000016305/ENSBTAG00000054354/ENSBTAG00000012413	MASP1/RFC4/IGF2BP2/TBL1XR1/FBXO45/APOD/PPP1R2/TMEM44/ATP13A4/bta-mir-2285bk/FGF12
	70092823	83430354	1	ENSBTAG00000012467/ENSBTAG00000014727/ENSBTAG00000007666/ENSBTAG00000006388/ENSBTAG00000023600/ENSBTAG00000006724/ENSBTAG00000002394/ENSBTAG00000016305/ENSBTAG00000054354/ENSBTAG00000012413	MASP1/RFC4/IGF2BP2/FBXO45/APOD/PPP1R2/TMEM44/ATP13A4/bta-mir-2285bk/FGF12
	71952197	74435001	1	ENSBTAG00000023600/ENSBTAG00000006724/ENSBTAG00000002394/ENSBTAG00000016305/ENSBTAG00000054354	APOD/PPP1R2/TMEM44/ATP13A4/bta-mir-2285bk
	72263009	74643836	1	ENSBTAG00000002394/ENSBTAG00000016305/ENSBTAG00000054354	TMEM44/ATP13A4/bta-mir-2285bk
	73295617	75171303	1	ENSBTAG00000016305/ENSBTAG00000054354/ENSBTAG00000012413	ATP13A4/bta-mir-2285bk/FGF12
	73328109	94998936	1	ENSBTAG00000012467/ENSBTAG00000014727/ENSBTAG00000007666/ENSBTAG00000021910/ENSBTAG00000016305/ENSBTAG00000054354/ENSBTAG00000012413	MASP1/RFC4/IGF2BP2/TBL1XR1/ATP13A4/bta-mir-2285bk/FGF12
	73741608	85766744	1	ENSBTAG00000012467/ENSBTAG00000014727/ENSBTAG00000007666/ENSBTAG00000016305/ENSBTAG00000054354/ENSBTAG00000012413	MASP1/RFC4/IGF2BP2/ATP13A4/bta-mir-2285bk/FGF12
	77282369	80661482	1	ENSBTAG00000012467/ENSBTAG00000014727	MASP1/RFC4
	79274441	81589478	1	ENSBTAG00000012467/ENSBTAG00000014727/ENSBTAG00000007666	MASP1/RFC4/IGF2BP2
	80612046	90416603	1	ENSBTAG00000007666/ENSBTAG00000021910	IGF2BP2/TBL1XR1
	80945924	87226006	1	ENSBTAG00000007666	IGF2BP2
	87573900	90311323	1	ENSBTAG00000021910	TBL1XR1
	95297194	158229218	1	ENSBTAG00000046015/ENSBTAG00000030670/ENSBTAG00000011495/ENSBTAG00000007039/ENSBTAG00000008167/ENSBTAG00000005230	1/PCNT/DIP2A/FBXO25/TTC3/SHOX2
	108282363	110629127	1	ENSBTAG00000005230	SHOX2
	126634308	146654252	1	ENSBTAG00000046015/ENSBTAG00000030670/ENSBTAG00000011495/ENSBTAG00000007039	1/PCNT/DIP2A/FBXO25
	138713450	152189521	1	ENSBTAG00000046015/ENSBTAG00000030670/ENSBTAG00000011495/ENSBTAG00000007039/ENSBTAG00000008167	1/PCNT/DIP2A/FBXO25/TTC3
	138762745	145573876	1	ENSBTAG00000046015	1
	144758824	147841620	1	ENSBTAG00000030670/ENSBTAG00000011495/ENSBTAG00000007039	PCNT/DIP2A/FBXO25
	145833897	151929994	1	ENSBTAG00000030670/ENSBTAG00000011495/ENSBTAG00000007039/ENSBTAG00000008167	PCNT/DIP2A/FBXO25/TTC3
	146131914	148009894	1	ENSBTAG00000011495/ENSBTAG00000007039	DIP2A/FBXO25
	146267223	148537543	1	ENSBTAG00000007039	FBXO25
	148684318	150900517	1	ENSBTAG00000008167	TTC3
	35126	21323746	2	ENSBTAG00000001097/ENSBTAG00000001096/ENSBTAG00000039522/ENSBTAG00000016396	FKBP7/PRKRA/CYCT/PDE11A
	55364	89978495	2	ENSBTAG00000024632/ENSBTAG00000015170/ENSBTAG00000020855/ENSBTAG00000001097/ENSBTAG00000001096/ENSBTAG00000039522/ENSBTAG00000016396/ENSBTAG00000031898/ENSBTAG00000004555/ENSBTAG00000017162/ENSBTAG00000002425	LRP1B/LCT/PTPN4/FKBP7/PRKRA/CYCT/PDE11A/CNTNAP5/LRP2/STK39/SCN9A
	4326755	57936544	2	ENSBTAG00000024632/ENSBTAG00000001097/ENSBTAG00000001096/ENSBTAG00000039522/ENSBTAG00000016396/ENSBTAG00000004555/ENSBTAG00000017162/ENSBTAG00000002425	LRP1B/FKBP7/PRKRA/CYCT/PDE11A/LRP2/STK39/SCN9A
	4876321	127917867	2	ENSBTAG00000021327/ENSBTAG00000002549/ENSBTAG00000026684/ENSBTAG00000027159/ENSBTAG00000008766/ENSBTAG00000024632/ENSBTAG00000015170/ENSBTAG00000020855/ENSBTAG00000001097/ENSBTAG00000001096/ENSBTAG00000039522/ENSBTAG00000016396/ENSBTAG00000031898/ENSBTAG00000004555/ENSBTAG00000017162/ENSBTAG00000002425/ENSBTAG00000005353/ENSBTAG00000046176	DAW1/PTMA/SYNC/ZBTB8OS/SLC9A1/LRP1B/LCT/PTPN4/FKBP7/PRKRA/CYCT/PDE11A/CNTNAP5/LRP2/STK39/SCN9A/DES/SPEG
	14403663	53113209	2	ENSBTAG00000001097/ENSBTAG00000001096/ENSBTAG00000039522/ENSBTAG00000016396/ENSBTAG00000004555/ENSBTAG00000017162/ENSBTAG00000002425	FKBP7/PRKRA/CYCT/PDE11A/LRP2/STK39/SCN9A
	16527366	18745691	2	ENSBTAG00000001097/ENSBTAG00000001096	FKBP7/PRKRA
	16978001	29811783	2	ENSBTAG00000001097/ENSBTAG00000001096/ENSBTAG00000039522/ENSBTAG00000016396/ENSBTAG00000004555/ENSBTAG00000017162	FKBP7/PRKRA/CYCT/PDE11A/LRP2/STK39
	18437934	41251021	2	ENSBTAG00000001096/ENSBTAG00000039522/ENSBTAG00000016396/ENSBTAG00000004555/ENSBTAG00000017162/ENSBTAG00000002425	PRKRA/CYCT/PDE11A/LRP2/STK39/SCN9A
	28462521	30426695	2	ENSBTAG00000002425	SCN9A
	29370591	57692075	2	ENSBTAG00000024632/ENSBTAG00000002425	LRP1B/SCN9A
	29370591	66462711	2	ENSBTAG00000024632/ENSBTAG00000015170/ENSBTAG00000002425	LRP1B/LCT/SCN9A
	29370591	110704913	2	ENSBTAG00000024632/ENSBTAG00000015170/ENSBTAG00000020855/ENSBTAG00000031898/ENSBTAG00000002425/ENSBTAG00000005353/ENSBTAG00000046176	LRP1B/LCT/PTPN4/CNTNAP5/SCN9A/DES/SPEG
	36483235	117893105	2	ENSBTAG00000021327/ENSBTAG00000024632/ENSBTAG00000015170/ENSBTAG00000020855/ENSBTAG00000031898/ENSBTAG00000005353/ENSBTAG00000046176	DAW1/LRP1B/LCT/PTPN4/CNTNAP5/DES/SPEG
	49175458	64043648	2	ENSBTAG00000024632/ENSBTAG00000015170	LRP1B/LCT
	50632840	79090198	2	ENSBTAG00000024632/ENSBTAG00000015170/ENSBTAG00000020855/ENSBTAG00000031898	LRP1B/LCT/PTPN4/CNTNAP5
	55118828	57320266	2	ENSBTAG00000024632	LRP1B
	57980393	90305149	2	ENSBTAG00000015170/ENSBTAG00000020855/ENSBTAG00000031898	LCT/PTPN4/CNTNAP5
	58265805	110704913	2	ENSBTAG00000015170/ENSBTAG00000020855/ENSBTAG00000031898/ENSBTAG00000005353/ENSBTAG00000046176	LCT/PTPN4/CNTNAP5/DES/SPEG
	58677652	136908437	2	ENSBTAG00000021327/ENSBTAG00000002549/ENSBTAG00000026684/ENSBTAG00000027159/ENSBTAG00000008766/ENSBTAG00000040329/ENSBTAG00000009502/ENSBTAG00000040215/ENSBTAG00000015170/ENSBTAG00000020855/ENSBTAG00000031898/ENSBTAG00000005353/ENSBTAG00000046176	DAW1/PTMA/SYNC/ZBTB8OS/SLC9A1/HTR1D/LUZP1/EIF4G3/LCT/PTPN4/CNTNAP5/DES/SPEG
	61134245	63751936	2	ENSBTAG00000015170	LCT
	65866839	113749274	2	ENSBTAG00000020855/ENSBTAG00000031898/ENSBTAG00000005353/ENSBTAG00000046176	PTPN4/CNTNAP5/DES/SPEG
	66137636	79414331	2	ENSBTAG00000020855/ENSBTAG00000031898	PTPN4/CNTNAP5
	70322692	73003429	2	ENSBTAG00000020855	PTPN4
	75484794	78256366	2	ENSBTAG00000031898	CNTNAP5
	76278152	116863719	2	ENSBTAG00000021327/ENSBTAG00000031898/ENSBTAG00000005353/ENSBTAG00000046176	DAW1/CNTNAP5/DES/SPEG
	89920315	117959436	2	ENSBTAG00000021327/ENSBTAG00000005353/ENSBTAG00000046176	DAW1/DES/SPEG
	90527996	123919123	2	ENSBTAG00000021327/ENSBTAG00000002549/ENSBTAG00000026684/ENSBTAG00000027159/ENSBTAG00000005353/ENSBTAG00000046176	DAW1/PTMA/SYNC/ZBTB8OS/DES/SPEG
	104256806	107432879	2	ENSBTAG00000005353/ENSBTAG00000046176	DES/SPEG
	105006704	120073875	2	ENSBTAG00000021327/ENSBTAG00000002549/ENSBTAG00000005353/ENSBTAG00000046176	DAW1/PTMA/DES/SPEG
	105133414	133914351	2	ENSBTAG00000021327/ENSBTAG00000002549/ENSBTAG00000026684/ENSBTAG00000027159/ENSBTAG00000008766/ENSBTAG00000040329/ENSBTAG00000009502/ENSBTAG00000040215/ENSBTAG00000005353/ENSBTAG00000046176	DAW1/PTMA/SYNC/ZBTB8OS/SLC9A1/HTR1D/LUZP1/EIF4G3/DES/SPEG
	110999596	136908437	2	ENSBTAG00000021327/ENSBTAG00000002549/ENSBTAG00000026684/ENSBTAG00000027159/ENSBTAG00000008766/ENSBTAG00000040329/ENSBTAG00000009502/ENSBTAG00000040215	DAW1/PTMA/SYNC/ZBTB8OS/SLC9A1/HTR1D/LUZP1/EIF4G3
	111462897	125798507	2	ENSBTAG00000021327/ENSBTAG00000002549/ENSBTAG00000026684/ENSBTAG00000027159	DAW1/PTMA/SYNC/ZBTB8OS
	112100889	127881684	2	ENSBTAG00000021327/ENSBTAG00000002549/ENSBTAG00000026684/ENSBTAG00000027159/ENSBTAG00000008766	DAW1/PTMA/SYNC/ZBTB8OS/SLC9A1
	114060265	118015855	2	ENSBTAG00000021327	DAW1
	116210744	136537629	2	ENSBTAG00000002549/ENSBTAG00000026684/ENSBTAG00000027159/ENSBTAG00000008766/ENSBTAG00000040329/ENSBTAG00000009502/ENSBTAG00000040215	PTMA/SYNC/ZBTB8OS/SLC9A1/HTR1D/LUZP1/EIF4G3
	116293266	127648283	2	ENSBTAG00000002549/ENSBTAG00000026684/ENSBTAG00000027159/ENSBTAG00000008766	PTMA/SYNC/ZBTB8OS/SLC9A1
	118277989	120721699	2	ENSBTAG00000002549	PTMA
	118398436	130219244	2	ENSBTAG00000002549/ENSBTAG00000026684/ENSBTAG00000027159/ENSBTAG00000008766/ENSBTAG00000040329/ENSBTAG00000009502	PTMA/SYNC/ZBTB8OS/SLC9A1/HTR1D/LUZP1
	119387551	121476153	2	ENSBTAG00000002549/ENSBTAG00000026684/ENSBTAG00000027159	PTMA/SYNC/ZBTB8OS
	120111418	122724102	2	ENSBTAG00000026684/ENSBTAG00000027159	SYNC/ZBTB8OS
	120251367	136697236	2	ENSBTAG00000026684/ENSBTAG00000027159/ENSBTAG00000008766/ENSBTAG00000040329/ENSBTAG00000009502/ENSBTAG00000040215	SYNC/ZBTB8OS/SLC9A1/HTR1D/LUZP1/EIF4G3
	124052334	136697236	2	ENSBTAG00000008766/ENSBTAG00000040329/ENSBTAG00000009502/ENSBTAG00000040215	SLC9A1/HTR1D/LUZP1/EIF4G3
	124651277	130881681	2	ENSBTAG00000008766/ENSBTAG00000040329/ENSBTAG00000009502	SLC9A1/HTR1D/LUZP1
	125227167	128484790	2	ENSBTAG00000008766	SLC9A1
	127860492	131372857	2	ENSBTAG00000040329/ENSBTAG00000009502	HTR1D/LUZP1
	129388250	131882804	2	ENSBTAG00000040329/ENSBTAG00000009502/ENSBTAG00000040215	HTR1D/LUZP1/EIF4G3
	129651238	131564411	2	ENSBTAG00000009502/ENSBTAG00000040215	LUZP1/EIF4G3
	130652581	134985418	2	ENSBTAG00000040215	EIF4G3
	25683	35840206	3	ENSBTAG00000031575/ENSBTAG00000019615	VAV3/PHTF1
	6211941	80486264	3	ENSBTAG00000031575/ENSBTAG00000003245/ENSBTAG00000024269/ENSBTAG00000019615/ENSBTAG00000055278/ENSBTAG00000001343/ENSBTAG00000054533/ENSBTAG00000030809/ENSBTAG00000005442	VAV3/BCAR3/TGFBR3/PHTF1/NEGR1/DEPDC1/GNG12/C3H1orf141/WDR78
	6235959	103454241	3	ENSBTAG00000012722/ENSBTAG00000003128/ENSBTAG00000017844/ENSBTAG00000043793/ENSBTAG00000052144/ENSBTAG00000005029/ENSBTAG00000002555/ENSBTAG00000000097/ENSBTAG00000000094/ENSBTAG00000023551/ENSBTAG00000019933/ENSBTAG00000031575/ENSBTAG00000009617/ENSBTAG00000003245/ENSBTAG00000024269/ENSBTAG00000019615/ENSBTAG00000055278/ENSBTAG00000001343/ENSBTAG00000054533/ENSBTAG00000030809/ENSBTAG00000005442/…	3/SPATA6/STIL/5S_rRNA/U6/TAL1/PDZK1IP1/EFCAB14/ATPAF1/MOB3C/MKNK1/VAV3/SLC2A1/BCAR3/TGFBR3/PHTF1/NEGR1/DEPDC1/GNG12/C3H1orf141/WDR78/DAB1
	9722400	78018190	3	ENSBTAG00000031575/ENSBTAG00000003245/ENSBTAG00000024269/ENSBTAG00000019615/ENSBTAG00000055278/ENSBTAG00000001343/ENSBTAG00000054533	VAV3/BCAR3/TGFBR3/PHTF1/NEGR1/DEPDC1/GNG12
	10547174	67376336	3	ENSBTAG00000031575/ENSBTAG00000003245/ENSBTAG00000024269/ENSBTAG00000019615	VAV3/BCAR3/TGFBR3/PHTF1
	10664578	121403393	3	ENSBTAG00000012722/ENSBTAG00000003128/ENSBTAG00000017844/ENSBTAG00000043793/ENSBTAG00000052144/ENSBTAG00000005029/ENSBTAG00000002555/ENSBTAG00000000097/ENSBTAG00000000094/ENSBTAG00000023551/ENSBTAG00000019933/ENSBTAG00000031575/ENSBTAG00000009617/ENSBTAG00000020622/ENSBTAG00000003245/ENSBTAG00000005732/ENSBTAG00000010175/ENSBTAG00000016694/ENSBTAG00000024269/ENSBTAG00000019615/ENSBTAG00000055278/…	3/SPATA6/STIL/5S_rRNA/U6/TAL1/PDZK1IP1/EFCAB14/ATPAF1/MOB3C/MKNK1/VAV3/SLC2A1/COL9A2/BCAR3/TRAPPC3/COL8A2/KIAA0319L/TGFBR3/PHTF1/NEGR1/DEPDC1/GNG12/C3H1orf141/WDR78/DAB1
	35441056	103448870	3	ENSBTAG00000012722/ENSBTAG00000003128/ENSBTAG00000017844/ENSBTAG00000043793/ENSBTAG00000052144/ENSBTAG00000005029/ENSBTAG00000002555/ENSBTAG00000000097/ENSBTAG00000000094/ENSBTAG00000023551/ENSBTAG00000019933/ENSBTAG00000031575/ENSBTAG00000009617/ENSBTAG00000003245/ENSBTAG00000024269/ENSBTAG00000055278/ENSBTAG00000001343/ENSBTAG00000054533/ENSBTAG00000030809/ENSBTAG00000005442/ENSBTAG00000013802	3/SPATA6/STIL/5S_rRNA/U6/TAL1/PDZK1IP1/EFCAB14/ATPAF1/MOB3C/MKNK1/VAV3/SLC2A1/BCAR3/TGFBR3/NEGR1/DEPDC1/GNG12/C3H1orf141/WDR78/DAB1
	36152918	76685944	3	ENSBTAG00000003245/ENSBTAG00000024269/ENSBTAG00000055278	BCAR3/TGFBR3/NEGR1
	36196363	89039841	3	ENSBTAG00000003245/ENSBTAG00000024269/ENSBTAG00000055278/ENSBTAG00000001343/ENSBTAG00000054533/ENSBTAG00000030809/ENSBTAG00000005442/ENSBTAG00000013802	BCAR3/TGFBR3/NEGR1/DEPDC1/GNG12/C3H1orf141/WDR78/DAB1
	36196363	121403393	3	ENSBTAG00000012722/ENSBTAG00000003128/ENSBTAG00000017844/ENSBTAG00000043793/ENSBTAG00000052144/ENSBTAG00000005029/ENSBTAG00000002555/ENSBTAG00000000097/ENSBTAG00000000094/ENSBTAG00000023551/ENSBTAG00000019933/ENSBTAG00000009617/ENSBTAG00000020622/ENSBTAG00000003245/ENSBTAG00000005732/ENSBTAG00000010175/ENSBTAG00000016694/ENSBTAG00000024269/ENSBTAG00000055278/ENSBTAG00000001343/ENSBTAG00000054533/…	3/SPATA6/STIL/5S_rRNA/U6/TAL1/PDZK1IP1/EFCAB14/ATPAF1/MOB3C/MKNK1/SLC2A1/COL9A2/BCAR3/TRAPPC3/COL8A2/KIAA0319L/TGFBR3/NEGR1/DEPDC1/GNG12/C3H1orf141/WDR78/DAB1
	40936344	102795097	3	ENSBTAG00000012722/ENSBTAG00000003128/ENSBTAG00000017844/ENSBTAG00000043793/ENSBTAG00000052144/ENSBTAG00000005029/ENSBTAG00000002555/ENSBTAG00000000097/ENSBTAG00000000094/ENSBTAG00000023551/ENSBTAG00000019933/ENSBTAG00000003245/ENSBTAG00000024269/ENSBTAG00000055278/ENSBTAG00000001343/ENSBTAG00000054533/ENSBTAG00000030809/ENSBTAG00000005442/ENSBTAG00000013802	3/SPATA6/STIL/5S_rRNA/U6/TAL1/PDZK1IP1/EFCAB14/ATPAF1/MOB3C/MKNK1/BCAR3/TGFBR3/NEGR1/DEPDC1/GNG12/C3H1orf141/WDR78/DAB1
	43531010	58990334	3	ENSBTAG00000003245/ENSBTAG00000024269	BCAR3/TGFBR3
	47947600	50509843	3	ENSBTAG00000003245	BCAR3
	48935268	79282515	3	ENSBTAG00000003245/ENSBTAG00000024269/ENSBTAG00000055278/ENSBTAG00000001343/ENSBTAG00000054533/ENSBTAG00000030809/ENSBTAG00000005442	BCAR3/TGFBR3/NEGR1/DEPDC1/GNG12/C3H1orf141/WDR78
	50731635	54016896	3	ENSBTAG00000024269	TGFBR3
	61213804	75047802	3	ENSBTAG00000055278	NEGR1
	66554349	89003233	3	ENSBTAG00000055278/ENSBTAG00000001343/ENSBTAG00000054533/ENSBTAG00000030809/ENSBTAG00000005442/ENSBTAG00000013802	NEGR1/DEPDC1/GNG12/C3H1orf141/WDR78/DAB1
	67474440	102795097	3	ENSBTAG00000012722/ENSBTAG00000003128/ENSBTAG00000017844/ENSBTAG00000043793/ENSBTAG00000052144/ENSBTAG00000005029/ENSBTAG00000002555/ENSBTAG00000000097/ENSBTAG00000000094/ENSBTAG00000023551/ENSBTAG00000019933/ENSBTAG00000055278/ENSBTAG00000001343/ENSBTAG00000054533/ENSBTAG00000030809/ENSBTAG00000005442/ENSBTAG00000013802	3/SPATA6/STIL/5S_rRNA/U6/TAL1/PDZK1IP1/EFCAB14/ATPAF1/MOB3C/MKNK1/NEGR1/DEPDC1/GNG12/C3H1orf141/WDR78/DAB1
	67474440	103454241	3	ENSBTAG00000012722/ENSBTAG00000003128/ENSBTAG00000017844/ENSBTAG00000043793/ENSBTAG00000052144/ENSBTAG00000005029/ENSBTAG00000002555/ENSBTAG00000000097/ENSBTAG00000000094/ENSBTAG00000023551/ENSBTAG00000019933/ENSBTAG00000009617/ENSBTAG00000055278/ENSBTAG00000001343/ENSBTAG00000054533/ENSBTAG00000030809/ENSBTAG00000005442/ENSBTAG00000013802	3/SPATA6/STIL/5S_rRNA/U6/TAL1/PDZK1IP1/EFCAB14/ATPAF1/MOB3C/MKNK1/SLC2A1/NEGR1/DEPDC1/GNG12/C3H1orf141/WDR78/DAB1
	69292666	121403393	3	ENSBTAG00000012722/ENSBTAG00000003128/ENSBTAG00000017844/ENSBTAG00000043793/ENSBTAG00000052144/ENSBTAG00000005029/ENSBTAG00000002555/ENSBTAG00000000097/ENSBTAG00000000094/ENSBTAG00000023551/ENSBTAG00000019933/ENSBTAG00000009617/ENSBTAG00000020622/ENSBTAG00000005732/ENSBTAG00000010175/ENSBTAG00000016694/ENSBTAG00000055278/ENSBTAG00000001343/ENSBTAG00000054533/ENSBTAG00000030809/ENSBTAG00000005442/…	3/SPATA6/STIL/5S_rRNA/U6/TAL1/PDZK1IP1/EFCAB14/ATPAF1/MOB3C/MKNK1/SLC2A1/COL9A2/TRAPPC3/COL8A2/KIAA0319L/NEGR1/DEPDC1/GNG12/C3H1orf141/WDR78/DAB1
	73652370	79508402	3	ENSBTAG00000055278/ENSBTAG00000001343/ENSBTAG00000054533/ENSBTAG00000030809/ENSBTAG00000005442	NEGR1/DEPDC1/GNG12/C3H1orf141/WDR78
	74856087	93460623	3	ENSBTAG00000001343/ENSBTAG00000054533/ENSBTAG00000030809/ENSBTAG00000005442/ENSBTAG00000013802	DEPDC1/GNG12/C3H1orf141/WDR78/DAB1
	74856087	103448870	3	ENSBTAG00000012722/ENSBTAG00000003128/ENSBTAG00000017844/ENSBTAG00000043793/ENSBTAG00000052144/ENSBTAG00000005029/ENSBTAG00000002555/ENSBTAG00000000097/ENSBTAG00000000094/ENSBTAG00000023551/ENSBTAG00000019933/ENSBTAG00000009617/ENSBTAG00000001343/ENSBTAG00000054533/ENSBTAG00000030809/ENSBTAG00000005442/ENSBTAG00000013802	3/SPATA6/STIL/5S_rRNA/U6/TAL1/PDZK1IP1/EFCAB14/ATPAF1/MOB3C/MKNK1/SLC2A1/DEPDC1/GNG12/C3H1orf141/WDR78/DAB1
	75023173	77734314	3	ENSBTAG00000001343/ENSBTAG00000054533	DEPDC1/GNG12
	75737505	78201865	3	ENSBTAG00000001343/ENSBTAG00000054533/ENSBTAG00000030809	DEPDC1/GNG12/C3H1orf141
	76297775	78564953	3	ENSBTAG00000001343/ENSBTAG00000054533/ENSBTAG00000030809/ENSBTAG00000005442	DEPDC1/GNG12/C3H1orf141/WDR78
	77129465	79333053	3	ENSBTAG00000054533/ENSBTAG00000030809/ENSBTAG00000005442	GNG12/C3H1orf141/WDR78
	92623849	103169062	3	ENSBTAG00000012722/ENSBTAG00000003128/ENSBTAG00000017844/ENSBTAG00000043793/ENSBTAG00000052144/ENSBTAG00000005029/ENSBTAG00000002555/ENSBTAG00000000097/ENSBTAG00000000094/ENSBTAG00000023551/ENSBTAG00000019933	3/SPATA6/STIL/5S_rRNA/U6/TAL1/PDZK1IP1/EFCAB14/ATPAF1/MOB3C/MKNK1
	94856229	97609382	3	ENSBTAG00000012722	3
	94856229	97850166	3	ENSBTAG00000012722/ENSBTAG00000003128	3/SPATA6
	96417242	99212078	3	ENSBTAG00000012722/ENSBTAG00000003128/ENSBTAG00000017844/ENSBTAG00000043793/ENSBTAG00000052144/ENSBTAG00000005029/ENSBTAG00000002555	3/SPATA6/STIL/5S_rRNA/U6/TAL1/PDZK1IP1
	96931770	98978974	3	ENSBTAG00000012722/ENSBTAG00000003128/ENSBTAG00000017844/ENSBTAG00000043793/ENSBTAG00000052144	3/SPATA6/STIL/5S_rRNA/U6
	97975773	100248366	3	ENSBTAG00000017844/ENSBTAG00000043793/ENSBTAG00000052144/ENSBTAG00000005029/ENSBTAG00000002555/ENSBTAG00000000097/ENSBTAG00000000094/ENSBTAG00000023551/ENSBTAG00000019933	STIL/5S_rRNA/U6/TAL1/PDZK1IP1/EFCAB14/ATPAF1/MOB3C/MKNK1
	98587436	109282190	3	ENSBTAG00000017844/ENSBTAG00000043793/ENSBTAG00000052144/ENSBTAG00000005029/ENSBTAG00000002555/ENSBTAG00000000097/ENSBTAG00000000094/ENSBTAG00000023551/ENSBTAG00000019933/ENSBTAG00000009617/ENSBTAG00000020622	STIL/5S_rRNA/U6/TAL1/PDZK1IP1/EFCAB14/ATPAF1/MOB3C/MKNK1/SLC2A1/COL9A2
	98929403	103469177	3	ENSBTAG00000017844/ENSBTAG00000043793/ENSBTAG00000052144/ENSBTAG00000005029/ENSBTAG00000002555/ENSBTAG00000000097/ENSBTAG00000000094/ENSBTAG00000023551/ENSBTAG00000019933/ENSBTAG00000009617	STIL/5S_rRNA/U6/TAL1/PDZK1IP1/EFCAB14/ATPAF1/MOB3C/MKNK1/SLC2A1
	99188015	101914613	3	ENSBTAG00000000097/ENSBTAG00000000094/ENSBTAG00000023551/ENSBTAG00000019933	EFCAB14/ATPAF1/MOB3C/MKNK1
	99242465	103448870	3	ENSBTAG00000000097/ENSBTAG00000000094/ENSBTAG00000023551/ENSBTAG00000019933/ENSBTAG00000009617	EFCAB14/ATPAF1/MOB3C/MKNK1/SLC2A1
	99242465	108283132	3	ENSBTAG00000000097/ENSBTAG00000000094/ENSBTAG00000023551/ENSBTAG00000019933/ENSBTAG00000009617/ENSBTAG00000020622	EFCAB14/ATPAF1/MOB3C/MKNK1/SLC2A1/COL9A2
	99525326	101785952	3	ENSBTAG00000019933	MKNK1
	100982336	103448870	3	ENSBTAG00000009617	SLC2A1
	102162018	109036828	3	ENSBTAG00000009617/ENSBTAG00000020622	SLC2A1/COL9A2
	102673503	121403393	3	ENSBTAG00000009617/ENSBTAG00000020622/ENSBTAG00000005732/ENSBTAG00000010175/ENSBTAG00000016694	SLC2A1/COL9A2/TRAPPC3/COL8A2/KIAA0319L
	104918043	120338365	3	ENSBTAG00000020622/ENSBTAG00000005732/ENSBTAG00000010175/ENSBTAG00000016694	COL9A2/TRAPPC3/COL8A2/KIAA0319L
	108000672	109821597	3	ENSBTAG00000005732/ENSBTAG00000010175	TRAPPC3/COL8A2
	108401517	110793254	3	ENSBTAG00000005732/ENSBTAG00000010175/ENSBTAG00000016694	TRAPPC3/COL8A2/KIAA0319L
	109757416	111816968	3	ENSBTAG00000016694	KIAA0319L
	2579337	72960813	4	ENSBTAG00000004023/ENSBTAG00000017664/ENSBTAG00000006138/ENSBTAG00000006876/ENSBTAG00000021849/ENSBTAG00000010062/ENSBTAG00000021469/ENSBTAG00000004398/ENSBTAG00000010597/ENSBTAG00000038235	KIAA1324L/HGF/SEMA3C/PMPCB/DUS4L/SLC26A4/CTTNBP2/IMMP2L/GGCT/NOD1
	2702626	96770424	4	ENSBTAG00000004023/ENSBTAG00000017664/ENSBTAG00000006138/ENSBTAG00000006876/ENSBTAG00000021849/ENSBTAG00000010062/ENSBTAG00000021469/ENSBTAG00000004398/ENSBTAG00000010597/ENSBTAG00000038235/ENSBTAG00000016975/ENSBTAG00000044925	KIAA1324L/HGF/SEMA3C/PMPCB/DUS4L/SLC26A4/CTTNBP2/IMMP2L/GGCT/NOD1/H2AFV/7SK
	7624594	82065122	4	ENSBTAG00000004023/ENSBTAG00000017664/ENSBTAG00000006138/ENSBTAG00000006876/ENSBTAG00000021849/ENSBTAG00000010062/ENSBTAG00000021469/ENSBTAG00000004398/ENSBTAG00000010597/ENSBTAG00000038235/ENSBTAG00000016975	KIAA1324L/HGF/SEMA3C/PMPCB/DUS4L/SLC26A4/CTTNBP2/IMMP2L/GGCT/NOD1/H2AFV
	18205494	48408626	4	ENSBTAG00000004023/ENSBTAG00000017664/ENSBTAG00000006138/ENSBTAG00000006876	KIAA1324L/HGF/SEMA3C/PMPCB
	19715038	49105752	4	ENSBTAG00000004023/ENSBTAG00000017664/ENSBTAG00000006138/ENSBTAG00000006876/ENSBTAG00000021849/ENSBTAG00000010062	KIAA1324L/HGF/SEMA3C/PMPCB/DUS4L/SLC26A4
	19836442	109073597	4	ENSBTAG00000013130/ENSBTAG00000001815/ENSBTAG00000004023/ENSBTAG00000017664/ENSBTAG00000006138/ENSBTAG00000006876/ENSBTAG00000021849/ENSBTAG00000010062/ENSBTAG00000021469/ENSBTAG00000004398/ENSBTAG00000010597/ENSBTAG00000038235/ENSBTAG00000016975/ENSBTAG00000044925	OR6V1/ARHGEF5/KIAA1324L/HGF/SEMA3C/PMPCB/DUS4L/SLC26A4/CTTNBP2/IMMP2L/GGCT/NOD1/H2AFV/7SK
	23293692	60635433	4	ENSBTAG00000004023/ENSBTAG00000017664/ENSBTAG00000006138/ENSBTAG00000006876/ENSBTAG00000021849/ENSBTAG00000010062/ENSBTAG00000021469/ENSBTAG00000004398	KIAA1324L/HGF/SEMA3C/PMPCB/DUS4L/SLC26A4/CTTNBP2/IMMP2L
	29381494	41217800	4	ENSBTAG00000004023/ENSBTAG00000017664/ENSBTAG00000006138	KIAA1324L/HGF/SEMA3C
	33496136	35903023	4	ENSBTAG00000004023	KIAA1324L
	36468716	59752165	4	ENSBTAG00000017664/ENSBTAG00000006138/ENSBTAG00000006876/ENSBTAG00000021849/ENSBTAG00000010062/ENSBTAG00000021469/ENSBTAG00000004398	HGF/SEMA3C/PMPCB/DUS4L/SLC26A4/CTTNBP2/IMMP2L
	37409461	39889039	4	ENSBTAG00000017664	HGF
	37902090	49522887	4	ENSBTAG00000017664/ENSBTAG00000006138/ENSBTAG00000006876/ENSBTAG00000021849/ENSBTAG00000010062	HGF/SEMA3C/PMPCB/DUS4L/SLC26A4
	38038091	40409928	4	ENSBTAG00000017664/ENSBTAG00000006138	HGF/SEMA3C
	41376527	60521073	4	ENSBTAG00000006876/ENSBTAG00000021849/ENSBTAG00000010062/ENSBTAG00000021469/ENSBTAG00000004398	PMPCB/DUS4L/SLC26A4/CTTNBP2/IMMP2L
	42065119	82065122	4	ENSBTAG00000006876/ENSBTAG00000021849/ENSBTAG00000010062/ENSBTAG00000021469/ENSBTAG00000004398/ENSBTAG00000010597/ENSBTAG00000038235/ENSBTAG00000016975	PMPCB/DUS4L/SLC26A4/CTTNBP2/IMMP2L/GGCT/NOD1/H2AFV
	42916786	91770132	4	ENSBTAG00000006876/ENSBTAG00000021849/ENSBTAG00000010062/ENSBTAG00000021469/ENSBTAG00000004398/ENSBTAG00000010597/ENSBTAG00000038235/ENSBTAG00000016975/ENSBTAG00000044925	PMPCB/DUS4L/SLC26A4/CTTNBP2/IMMP2L/GGCT/NOD1/H2AFV/7SK
	42916786	120641946	4	ENSBTAG00000013130/ENSBTAG00000001815/ENSBTAG00000006876/ENSBTAG00000021849/ENSBTAG00000010062/ENSBTAG00000021469/ENSBTAG00000004398/ENSBTAG00000010597/ENSBTAG00000038235/ENSBTAG00000016975/ENSBTAG00000044925	OR6V1/ARHGEF5/PMPCB/DUS4L/SLC26A4/CTTNBP2/IMMP2L/GGCT/NOD1/H2AFV/7SK
	43175304	73699663	4	ENSBTAG00000006876/ENSBTAG00000021849/ENSBTAG00000010062/ENSBTAG00000021469/ENSBTAG00000004398/ENSBTAG00000010597/ENSBTAG00000038235	PMPCB/DUS4L/SLC26A4/CTTNBP2/IMMP2L/GGCT/NOD1
	43556172	47094789	4	ENSBTAG00000006876	PMPCB
	44400745	49715347	4	ENSBTAG00000006876/ENSBTAG00000021849/ENSBTAG00000010062	PMPCB/DUS4L/SLC26A4
	46358600	63617795	4	ENSBTAG00000021849/ENSBTAG00000010062/ENSBTAG00000021469/ENSBTAG00000004398	DUS4L/SLC26A4/CTTNBP2/IMMP2L
	47011259	49273818	4	ENSBTAG00000021849/ENSBTAG00000010062	DUS4L/SLC26A4
	48058440	50516693	4	ENSBTAG00000021849/ENSBTAG00000010062/ENSBTAG00000021469	DUS4L/SLC26A4/CTTNBP2
	48492026	80836727	4	ENSBTAG00000021849/ENSBTAG00000010062/ENSBTAG00000021469/ENSBTAG00000004398/ENSBTAG00000010597/ENSBTAG00000038235/ENSBTAG00000016975	DUS4L/SLC26A4/CTTNBP2/IMMP2L/GGCT/NOD1/H2AFV
	48492026	90703088	4	ENSBTAG00000021849/ENSBTAG00000010062/ENSBTAG00000021469/ENSBTAG00000004398/ENSBTAG00000010597/ENSBTAG00000038235/ENSBTAG00000016975/ENSBTAG00000044925	DUS4L/SLC26A4/CTTNBP2/IMMP2L/GGCT/NOD1/H2AFV/7SK
	49760465	73635712	4	ENSBTAG00000021469/ENSBTAG00000004398/ENSBTAG00000010597/ENSBTAG00000038235	CTTNBP2/IMMP2L/GGCT/NOD1
	49760465	90458443	4	ENSBTAG00000021469/ENSBTAG00000004398/ENSBTAG00000010597/ENSBTAG00000038235/ENSBTAG00000016975/ENSBTAG00000044925	CTTNBP2/IMMP2L/GGCT/NOD1/H2AFV/7SK
	55050570	57673965	4	ENSBTAG00000004398	IMMP2L
	56428646	70537648	4	ENSBTAG00000004398/ENSBTAG00000010597/ENSBTAG00000038235	IMMP2L/GGCT/NOD1
	62876037	87086801	4	ENSBTAG00000010597/ENSBTAG00000038235/ENSBTAG00000016975/ENSBTAG00000044925	GGCT/NOD1/H2AFV/7SK
	64351574	72071212	4	ENSBTAG00000010597/ENSBTAG00000038235	GGCT/NOD1
	73058537	111843890	4	ENSBTAG00000013130/ENSBTAG00000001815/ENSBTAG00000016975/ENSBTAG00000044925	OR6V1/ARHGEF5/H2AFV/7SK
	75780515	78247625	4	ENSBTAG00000016975	H2AFV
	22599252	81437878	5	ENSBTAG00000000818/ENSBTAG00000010644/ENSBTAG00000004851/ENSBTAG00000045023/ENSBTAG00000016593/ENSBTAG00000005859/ENSBTAG00000012423/ENSBTAG00000000859/ENSBTAG00000010624/ENSBTAG00000031544/ENSBTAG00000018403	PLEKHG7/CHST11/NCKAP5L/bta-mir-2425/FMNL3/LALBA/SENP1/SLC38A1/DCTN2/DDIT3/ARHGAP9
	24458645	82540690	5	ENSBTAG00000010644/ENSBTAG00000004851/ENSBTAG00000045023/ENSBTAG00000016593/ENSBTAG00000005859/ENSBTAG00000012423/ENSBTAG00000000859/ENSBTAG00000010624/ENSBTAG00000031544/ENSBTAG00000018403	CHST11/NCKAP5L/bta-mir-2425/FMNL3/LALBA/SENP1/SLC38A1/DCTN2/DDIT3/ARHGAP9
	24628072	30994765	5	ENSBTAG00000004851/ENSBTAG00000045023/ENSBTAG00000016593	NCKAP5L/bta-mir-2425/FMNL3
	24628072	31246762	5	ENSBTAG00000004851/ENSBTAG00000045023/ENSBTAG00000016593/ENSBTAG00000005859	NCKAP5L/bta-mir-2425/FMNL3/LALBA
	24820395	59745615	5	ENSBTAG00000004851/ENSBTAG00000045023/ENSBTAG00000016593/ENSBTAG00000005859/ENSBTAG00000012423/ENSBTAG00000000859/ENSBTAG00000010624/ENSBTAG00000031544/ENSBTAG00000018403	NCKAP5L/bta-mir-2425/FMNL3/LALBA/SENP1/SLC38A1/DCTN2/DDIT3/ARHGAP9
	28182342	33481261	5	ENSBTAG00000004851/ENSBTAG00000045023/ENSBTAG00000016593/ENSBTAG00000005859/ENSBTAG00000012423	NCKAP5L/bta-mir-2425/FMNL3/LALBA/SENP1
	28209262	37138498	5	ENSBTAG00000004851/ENSBTAG00000045023/ENSBTAG00000016593/ENSBTAG00000005859/ENSBTAG00000012423/ENSBTAG00000000859	NCKAP5L/bta-mir-2425/FMNL3/LALBA/SENP1/SLC38A1
	30085168	47427815	5	ENSBTAG00000004851/ENSBTAG00000016593/ENSBTAG00000005859/ENSBTAG00000012423/ENSBTAG00000000859	NCKAP5L/FMNL3/LALBA/SENP1/SLC38A1
	32905258	35996403	5	ENSBTAG00000000859	SLC38A1
	33665735	59745615	5	ENSBTAG00000000859/ENSBTAG00000010624/ENSBTAG00000031544/ENSBTAG00000018403	SLC38A1/DCTN2/DDIT3/ARHGAP9
	33665735	89425557	5	ENSBTAG00000010644/ENSBTAG00000000859/ENSBTAG00000019294/ENSBTAG00000010624/ENSBTAG00000031544/ENSBTAG00000018403	CHST11/SLC38A1/ABCC9/DCTN2/DDIT3/ARHGAP9
	43121332	66605011	5	ENSBTAG00000010624/ENSBTAG00000031544/ENSBTAG00000018403	DCTN2/DDIT3/ARHGAP9
	46791356	69200488	5	ENSBTAG00000010644/ENSBTAG00000010624/ENSBTAG00000031544/ENSBTAG00000018403	CHST11/DCTN2/DDIT3/ARHGAP9
	47559492	89512928	5	ENSBTAG00000010644/ENSBTAG00000019294/ENSBTAG00000010624/ENSBTAG00000031544/ENSBTAG00000018403	CHST11/ABCC9/DCTN2/DDIT3/ARHGAP9
	56158887	68380218	5	ENSBTAG00000010644	CHST11
	60045785	93162784	5	ENSBTAG00000010644/ENSBTAG00000019294	CHST11/ABCC9
	60373086	104818406	5	ENSBTAG00000049573/ENSBTAG00000010644/ENSBTAG00000019294/ENSBTAG00000000219	bta-mir-12002b/CHST11/ABCC9/GRIN2B
	60485582	97426617	5	ENSBTAG00000010644/ENSBTAG00000019294/ENSBTAG00000000219	CHST11/ABCC9/GRIN2B
	81612132	120718722	5	ENSBTAG00000049573/ENSBTAG00000019294/ENSBTAG00000000219/ENSBTAG00000009704/ENSBTAG00000039784/ENSBTAG00000010590/ENSBTAG00000021803/ENSBTAG00000022986/ENSBTAG00000018660	bta-mir-12002b/ABCC9/GRIN2B/CECR2/PRR5/FAM118A/GRAMD4/TAFA5/PPP6R2
	86085385	103478830	5	ENSBTAG00000049573/ENSBTAG00000019294/ENSBTAG00000000219	bta-mir-12002b/ABCC9/GRIN2B
	87634282	97370010	5	ENSBTAG00000019294/ENSBTAG00000000219	ABCC9/GRIN2B
	88105584	90806866	5	ENSBTAG00000019294	ABCC9
	91408594	121175859	5	ENSBTAG00000049573/ENSBTAG00000000219/ENSBTAG00000009704/ENSBTAG00000039784/ENSBTAG00000010590/ENSBTAG00000021803/ENSBTAG00000022986/ENSBTAG00000018660	bta-mir-12002b/GRIN2B/CECR2/PRR5/FAM118A/GRAMD4/TAFA5/PPP6R2
	91678519	100355147	5	ENSBTAG00000049573/ENSBTAG00000000219	bta-mir-12002b/GRIN2B
	95207005	98427389	5	ENSBTAG00000000219	GRIN2B
	96190402	113012498	5	ENSBTAG00000049573/ENSBTAG00000000219/ENSBTAG00000009704	bta-mir-12002b/GRIN2B/CECR2
	96329070	106565308	5	ENSBTAG00000049573	bta-mir-12002b
	97092842	121175859	5	ENSBTAG00000049573/ENSBTAG00000009704/ENSBTAG00000039784/ENSBTAG00000010590/ENSBTAG00000021803/ENSBTAG00000022986/ENSBTAG00000018660	bta-mir-12002b/CECR2/PRR5/FAM118A/GRAMD4/TAFA5/PPP6R2
	100188524	121175859	5	ENSBTAG00000009704/ENSBTAG00000039784/ENSBTAG00000010590/ENSBTAG00000021803/ENSBTAG00000022986/ENSBTAG00000018660	CECR2/PRR5/FAM118A/GRAMD4/TAFA5/PPP6R2
	107105116	109134816	5	ENSBTAG00000009704	CECR2
	108551135	116005043	5	ENSBTAG00000009704/ENSBTAG00000039784/ENSBTAG00000010590	CECR2/PRR5/FAM118A
	108721301	119139076	5	ENSBTAG00000009704/ENSBTAG00000039784/ENSBTAG00000010590/ENSBTAG00000021803/ENSBTAG00000022986	CECR2/PRR5/FAM118A/GRAMD4/TAFA5
	110886859	115423180	5	ENSBTAG00000039784	PRR5
	111635921	116252285	5	ENSBTAG00000039784/ENSBTAG00000010590	PRR5/FAM118A
	113817271	119023407	5	ENSBTAG00000039784/ENSBTAG00000010590/ENSBTAG00000021803/ENSBTAG00000022986	PRR5/FAM118A/GRAMD4/TAFA5
	114538655	121175859	5	ENSBTAG00000039784/ENSBTAG00000010590/ENSBTAG00000021803/ENSBTAG00000022986/ENSBTAG00000018660	PRR5/FAM118A/GRAMD4/TAFA5/PPP6R2
	114621971	116861955	5	ENSBTAG00000039784/ENSBTAG00000010590/ENSBTAG00000021803	PRR5/FAM118A/GRAMD4
	117159857	121175859	5	ENSBTAG00000022986/ENSBTAG00000018660	TAFA5/PPP6R2
	118708739	120611631	5	ENSBTAG00000018660	PPP6R2
	36766	70186855	6	ENSBTAG00000014463/ENSBTAG00000033648/ENSBTAG00000020363/ENSBTAG00000000061/ENSBTAG00000020367/ENSBTAG00000055038	CAMK2D/INTS12/GBA3/PCDH7/SLC30A9/bta-mir-2285cs
	6807282	27647533	6	ENSBTAG00000014463/ENSBTAG00000033648	CAMK2D/INTS12
	8213084	11816127	6	ENSBTAG00000014463	CAMK2D
	14290917	22363715	6	ENSBTAG00000033648	INTS12
	16736054	91812788	6	ENSBTAG00000033648/ENSBTAG00000020363/ENSBTAG00000000061/ENSBTAG00000020367/ENSBTAG00000055038/ENSBTAG00000010273/ENSBTAG00000018134	INTS12/GBA3/PCDH7/SLC30A9/bta-mir-2285cs/EREG/AREG
	16960877	72434618	6	ENSBTAG00000033648/ENSBTAG00000020363/ENSBTAG00000000061/ENSBTAG00000020367/ENSBTAG00000055038	INTS12/GBA3/PCDH7/SLC30A9/bta-mir-2285cs
	25593943	104385502	6	ENSBTAG00000010716/ENSBTAG00000010153/ENSBTAG00000001126/ENSBTAG00000011354/ENSBTAG00000004292/ENSBTAG00000011163/ENSBTAG00000020363/ENSBTAG00000000061/ENSBTAG00000020367/ENSBTAG00000055038/ENSBTAG00000010273/ENSBTAG00000018134	FRAS1/ANXA3/BMP2K/NUDT9/CRMP1/CYTL1/GBA3/PCDH7/SLC30A9/bta-mir-2285cs/EREG/AREG
	26377975	111436339	6	ENSBTAG00000010716/ENSBTAG00000010153/ENSBTAG00000001126/ENSBTAG00000011354/ENSBTAG00000004292/ENSBTAG00000011163/ENSBTAG00000019847/ENSBTAG00000010343/ENSBTAG00000020363/ENSBTAG00000000061/ENSBTAG00000020367/ENSBTAG00000055038/ENSBTAG00000010273/ENSBTAG00000018134	FRAS1/ANXA3/BMP2K/NUDT9/CRMP1/CYTL1/CPEB2/C1QTNF7/GBA3/PCDH7/SLC30A9/bta-mir-2285cs/EREG/AREG
	29012174	110437469	6	ENSBTAG00000010716/ENSBTAG00000010153/ENSBTAG00000001126/ENSBTAG00000011354/ENSBTAG00000004292/ENSBTAG00000011163/ENSBTAG00000019847/ENSBTAG00000020363/ENSBTAG00000000061/ENSBTAG00000020367/ENSBTAG00000055038/ENSBTAG00000010273/ENSBTAG00000018134	FRAS1/ANXA3/BMP2K/NUDT9/CRMP1/CYTL1/CPEB2/GBA3/PCDH7/SLC30A9/bta-mir-2285cs/EREG/AREG
	32293744	61017491	6	ENSBTAG00000020363/ENSBTAG00000000061/ENSBTAG00000020367	GBA3/PCDH7/SLC30A9
	36316624	74881485	6	ENSBTAG00000020363/ENSBTAG00000000061/ENSBTAG00000020367/ENSBTAG00000055038	GBA3/PCDH7/SLC30A9/bta-mir-2285cs
	36986502	53111008	6	ENSBTAG00000020363/ENSBTAG00000000061	GBA3/PCDH7
	40893067	43274120	6	ENSBTAG00000020363	GBA3
	45129441	51895523	6	ENSBTAG00000000061	PCDH7
	47474140	72043058	6	ENSBTAG00000000061/ENSBTAG00000020367/ENSBTAG00000055038	PCDH7/SLC30A9/bta-mir-2285cs
	49695302	61407285	6	ENSBTAG00000000061/ENSBTAG00000020367	PCDH7/SLC30A9
	52793934	106517122	6	ENSBTAG00000010716/ENSBTAG00000010153/ENSBTAG00000001126/ENSBTAG00000011354/ENSBTAG00000004292/ENSBTAG00000011163/ENSBTAG00000020367/ENSBTAG00000055038/ENSBTAG00000010273/ENSBTAG00000018134	FRAS1/ANXA3/BMP2K/NUDT9/CRMP1/CYTL1/SLC30A9/bta-mir-2285cs/EREG/AREG
	59515328	61810659	6	ENSBTAG00000020367/ENSBTAG00000055038	SLC30A9/bta-mir-2285cs
	88721536	91518537	6	ENSBTAG00000010273/ENSBTAG00000018134	EREG/AREG
	89344775	92195532	6	ENSBTAG00000018134	AREG
	90160155	103505813	6	ENSBTAG00000010716/ENSBTAG00000010153/ENSBTAG00000001126/ENSBTAG00000011354/ENSBTAG00000004292	FRAS1/ANXA3/BMP2K/NUDT9/CRMP1
	90797634	104385502	6	ENSBTAG00000010716/ENSBTAG00000010153/ENSBTAG00000001126/ENSBTAG00000011354/ENSBTAG00000004292/ENSBTAG00000011163	FRAS1/ANXA3/BMP2K/NUDT9/CRMP1/CYTL1
	91011903	111237200	6	ENSBTAG00000010716/ENSBTAG00000010153/ENSBTAG00000001126/ENSBTAG00000011354/ENSBTAG00000004292/ENSBTAG00000011163/ENSBTAG00000019847/ENSBTAG00000010343	FRAS1/ANXA3/BMP2K/NUDT9/CRMP1/CYTL1/CPEB2/C1QTNF7
	91313177	93438613	6	ENSBTAG00000010716/ENSBTAG00000010153	FRAS1/ANXA3
	91485845	94890117	6	ENSBTAG00000010716/ENSBTAG00000010153/ENSBTAG00000001126	FRAS1/ANXA3/BMP2K
	92114206	93175994	6	ENSBTAG00000010716	FRAS1
	92922752	119437258	6	ENSBTAG00000010716/ENSBTAG00000010153/ENSBTAG00000001126/ENSBTAG00000011354/ENSBTAG00000004292/ENSBTAG00000011163/ENSBTAG00000019847/ENSBTAG00000010343/ENSBTAG00000000073/ENSBTAG00000017921	FRAS1/ANXA3/BMP2K/NUDT9/CRMP1/CYTL1/CPEB2/C1QTNF7/LRPAP1/NELFA
	93414199	95924980	6	ENSBTAG00000001126	BMP2K
	96870299	114348630	6	ENSBTAG00000011354/ENSBTAG00000004292/ENSBTAG00000011163/ENSBTAG00000019847/ENSBTAG00000010343	NUDT9/CRMP1/CYTL1/CPEB2/C1QTNF7
	97103089	110445380	6	ENSBTAG00000011354/ENSBTAG00000004292/ENSBTAG00000011163/ENSBTAG00000019847	NUDT9/CRMP1/CYTL1/CPEB2
	100186246	103133828	6	ENSBTAG00000011354	NUDT9
	100802891	119216563	6	ENSBTAG00000011354/ENSBTAG00000004292/ENSBTAG00000011163/ENSBTAG00000019847/ENSBTAG00000010343/ENSBTAG00000000073/ENSBTAG00000017921	NUDT9/CRMP1/CYTL1/CPEB2/C1QTNF7/LRPAP1/NELFA
	102019388	104835345	6	ENSBTAG00000011354/ENSBTAG00000004292/ENSBTAG00000011163	NUDT9/CRMP1/CYTL1
	102495127	104371743	6	ENSBTAG00000004292/ENSBTAG00000011163	CRMP1/CYTL1
	102805940	112098405	6	ENSBTAG00000004292/ENSBTAG00000011163/ENSBTAG00000019847/ENSBTAG00000010343	CRMP1/CYTL1/CPEB2/C1QTNF7
	102914384	115693568	6	ENSBTAG00000004292/ENSBTAG00000011163/ENSBTAG00000019847/ENSBTAG00000010343/ENSBTAG00000000073	CRMP1/CYTL1/CPEB2/C1QTNF7/LRPAP1
	103774451	106352920	6	ENSBTAG00000011163	CYTL1
	104449287	110445380	6	ENSBTAG00000019847	CPEB2
	109719477	116210137	6	ENSBTAG00000019847/ENSBTAG00000010343/ENSBTAG00000000073	CPEB2/C1QTNF7/LRPAP1
	109775773	116864937	6	ENSBTAG00000019847/ENSBTAG00000010343/ENSBTAG00000000073/ENSBTAG00000017921	CPEB2/C1QTNF7/LRPAP1/NELFA
	109868839	114620415	6	ENSBTAG00000019847/ENSBTAG00000010343	CPEB2/C1QTNF7
	110508154	116714864	6	ENSBTAG00000010343/ENSBTAG00000000073/ENSBTAG00000017921	C1QTNF7/LRPAP1/NELFA
	110559420	111967710	6	ENSBTAG00000010343	C1QTNF7
	110708982	115672242	6	ENSBTAG00000000073	LRPAP1
	114747565	116864937	6	ENSBTAG00000000073/ENSBTAG00000017921	LRPAP1/NELFA
	116329490	118823458	6	ENSBTAG00000017921	NELFA
	7845456	70370024	7	ENSBTAG00000012943/ENSBTAG00000017079/ENSBTAG00000011398/ENSBTAG00000001394/ENSBTAG00000001767/ENSBTAG00000031235	PPARGC1B/MFAP3/PRR7/TMED9/B4GALT7/IL5
	7845456	93423885	7	ENSBTAG00000012943/ENSBTAG00000017079/ENSBTAG00000011398/ENSBTAG00000001394/ENSBTAG00000001767/ENSBTAG00000038117/ENSBTAG00000009565/ENSBTAG00000006031/ENSBTAG00000031235	PPARGC1B/MFAP3/PRR7/TMED9/B4GALT7/ATG10/RASA1/ADGRV1/IL5
	19019059	23315210	7	ENSBTAG00000031235	IL5
	21881973	48089488	7	ENSBTAG00000011398/ENSBTAG00000001394/ENSBTAG00000001767/ENSBTAG00000031235	PRR7/TMED9/B4GALT7/IL5
	33027483	98820742	7	ENSBTAG00000012943/ENSBTAG00000017079/ENSBTAG00000011398/ENSBTAG00000001394/ENSBTAG00000001767/ENSBTAG00000038117/ENSBTAG00000009565/ENSBTAG00000006031	PPARGC1B/MFAP3/PRR7/TMED9/B4GALT7/ATG10/RASA1/ADGRV1
	33099337	74066243	7	ENSBTAG00000012943/ENSBTAG00000017079/ENSBTAG00000011398/ENSBTAG00000001394/ENSBTAG00000001767	PPARGC1B/MFAP3/PRR7/TMED9/B4GALT7
	36992936	39087132	7	ENSBTAG00000011398	PRR7
	38780609	40644182	7	ENSBTAG00000011398/ENSBTAG00000001394/ENSBTAG00000001767	PRR7/TMED9/B4GALT7
	42788788	93218452	7	ENSBTAG00000012943/ENSBTAG00000017079/ENSBTAG00000038117/ENSBTAG00000009565/ENSBTAG00000006031	PPARGC1B/MFAP3/ATG10/RASA1/ADGRV1
	50350967	79012351	7	ENSBTAG00000012943/ENSBTAG00000017079	PPARGC1B/MFAP3
	59190662	61228269	7	ENSBTAG00000012943	PPARGC1B
	63547825	65761014	7	ENSBTAG00000017079	MFAP3
	70118464	91507089	7	ENSBTAG00000038117/ENSBTAG00000009565/ENSBTAG00000006031	ATG10/RASA1/ADGRV1
	357078	91667879	8	ENSBTAG00000043972/ENSBTAG00000009917/ENSBTAG00000021586/ENSBTAG00000018437/ENSBTAG00000003532/ENSBTAG00000025859/ENSBTAG00000012243/ENSBTAG00000046574/ENSBTAG00000015378/ENSBTAG00000006446/ENSBTAG00000004944/ENSBTAG00000035007	SLC24A2/PIP5K1B/FAM122A/SMC5/TLE4/ZCCHC7/POLR1E/FRMPD1/CCDC180/CNTNAP3/ANXA10/GALNTL6
	3737837	8340612	8	ENSBTAG00000035007	GALNTL6
	10140515	89587806	8	ENSBTAG00000043972/ENSBTAG00000009917/ENSBTAG00000021586/ENSBTAG00000018437/ENSBTAG00000003532/ENSBTAG00000025859/ENSBTAG00000012243/ENSBTAG00000046574/ENSBTAG00000015378/ENSBTAG00000006446	SLC24A2/PIP5K1B/FAM122A/SMC5/TLE4/ZCCHC7/POLR1E/FRMPD1/CCDC180/CNTNAP3
	10507032	103043573	8	ENSBTAG00000043972/ENSBTAG00000009917/ENSBTAG00000021586/ENSBTAG00000018437/ENSBTAG00000014471/ENSBTAG00000003532/ENSBTAG00000025859/ENSBTAG00000012243/ENSBTAG00000046574/ENSBTAG00000015378/ENSBTAG00000006446	SLC24A2/PIP5K1B/FAM122A/SMC5/PALM2/TLE4/ZCCHC7/POLR1E/FRMPD1/CCDC180/CNTNAP3
	10583143	109328452	8	ENSBTAG00000043972/ENSBTAG00000009917/ENSBTAG00000021586/ENSBTAG00000018437/ENSBTAG00000014471/ENSBTAG00000003532/ENSBTAG00000025859/ENSBTAG00000012243/ENSBTAG00000046574/ENSBTAG00000000203/ENSBTAG00000000204/ENSBTAG00000015378/ENSBTAG00000006446	SLC24A2/PIP5K1B/FAM122A/SMC5/PALM2/TLE4/ZCCHC7/POLR1E/FRMPD1/ATP6V1G1/TMEM268/CCDC180/CNTNAP3
	21921131	25850783	8	ENSBTAG00000043972	SLC24A2
	25115125	63358564	8	ENSBTAG00000009917/ENSBTAG00000021586/ENSBTAG00000018437/ENSBTAG00000003532/ENSBTAG00000025859/ENSBTAG00000012243/ENSBTAG00000046574/ENSBTAG00000015378	PIP5K1B/FAM122A/SMC5/TLE4/ZCCHC7/POLR1E/FRMPD1/CCDC180
	35464882	89824596	8	ENSBTAG00000009917/ENSBTAG00000021586/ENSBTAG00000018437/ENSBTAG00000003532/ENSBTAG00000025859/ENSBTAG00000012243/ENSBTAG00000046574/ENSBTAG00000015378/ENSBTAG00000006446	PIP5K1B/FAM122A/SMC5/TLE4/ZCCHC7/POLR1E/FRMPD1/CCDC180/CNTNAP3
	43202753	60474882	8	ENSBTAG00000009917/ENSBTAG00000021586/ENSBTAG00000018437/ENSBTAG00000003532	PIP5K1B/FAM122A/SMC5/TLE4
	45130290	47692727	8	ENSBTAG00000009917/ENSBTAG00000018437	PIP5K1B/SMC5
	45278936	48661319	8	ENSBTAG00000018437	SMC5
	47041865	110015684	8	ENSBTAG00000014471/ENSBTAG00000003532/ENSBTAG00000025859/ENSBTAG00000012243/ENSBTAG00000046574/ENSBTAG00000000203/ENSBTAG00000000204/ENSBTAG00000015378/ENSBTAG00000006446	PALM2/TLE4/ZCCHC7/POLR1E/FRMPD1/ATP6V1G1/TMEM268/CCDC180/CNTNAP3
	54920696	62544260	8	ENSBTAG00000003532/ENSBTAG00000025859/ENSBTAG00000012243/ENSBTAG00000046574/ENSBTAG00000015378	TLE4/ZCCHC7/POLR1E/FRMPD1/CCDC180
	55319864	60736666	8	ENSBTAG00000003532	TLE4
	55319864	83730419	8	ENSBTAG00000003532/ENSBTAG00000025859/ENSBTAG00000012243/ENSBTAG00000046574/ENSBTAG00000015378/ENSBTAG00000006446	TLE4/ZCCHC7/POLR1E/FRMPD1/CCDC180/CNTNAP3
	57307140	61915344	8	ENSBTAG00000025859/ENSBTAG00000012243/ENSBTAG00000046574	ZCCHC7/POLR1E/FRMPD1
	58361529	61356475	8	ENSBTAG00000025859	ZCCHC7
	60589007	68659666	8	ENSBTAG00000025859/ENSBTAG00000012243/ENSBTAG00000046574/ENSBTAG00000015378/ENSBTAG00000006446	ZCCHC7/POLR1E/FRMPD1/CCDC180/CNTNAP3
	61264051	64244606	8	ENSBTAG00000025859/ENSBTAG00000012243/ENSBTAG00000046574/ENSBTAG00000015378	ZCCHC7/POLR1E/FRMPD1/CCDC180
	61536940	63840086	8	ENSBTAG00000012243/ENSBTAG00000046574/ENSBTAG00000015378	POLR1E/FRMPD1/CCDC180
	62216452	65833320	8	ENSBTAG00000015378	CCDC180
	63504584	66785437	8	ENSBTAG00000006446	CNTNAP3
	64373060	113367096	8	ENSBTAG00000014471/ENSBTAG00000000203/ENSBTAG00000000204/ENSBTAG00000006446/ENSBTAG00000003540/ENSBTAG00000050986	PALM2/ATP6V1G1/TMEM268/CNTNAP3/MYT1L/PXDN
	86442366	113367096	8	ENSBTAG00000014471/ENSBTAG00000000203/ENSBTAG00000000204/ENSBTAG00000003540/ENSBTAG00000050986	PALM2/ATP6V1G1/TMEM268/MYT1L/PXDN
	97916681	100173145	8	ENSBTAG00000014471	PALM2
	98967406	104383991	8	ENSBTAG00000014471/ENSBTAG00000000203/ENSBTAG00000000204	PALM2/ATP6V1G1/TMEM268
	101404929	104383991	8	ENSBTAG00000000203/ENSBTAG00000000204	ATP6V1G1/TMEM268
	102361784	113367096	8	ENSBTAG00000000203/ENSBTAG00000000204/ENSBTAG00000003540/ENSBTAG00000050986	ATP6V1G1/TMEM268/MYT1L/PXDN
	110783585	113367096	8	ENSBTAG00000003540/ENSBTAG00000050986	MYT1L/PXDN
	13950	18951225	9	ENSBTAG00000019139/ENSBTAG00000038190/ENSBTAG00000007791	PHF3/SMAP1/KCNQ5
	70012	3209712	9	ENSBTAG00000019139	PHF3
	112105	10370879	9	ENSBTAG00000019139/ENSBTAG00000038190	PHF3/SMAP1
	112105	26267511	9	ENSBTAG00000019139/ENSBTAG00000038190/ENSBTAG00000007791/ENSBTAG00000003340/ENSBTAG00000044951	PHF3/SMAP1/KCNQ5/HDDC2/bta-mir-2477
	112105	81558849	9	ENSBTAG00000018438/ENSBTAG00000019139/ENSBTAG00000038190/ENSBTAG00000007791/ENSBTAG00000003340/ENSBTAG00000044951/ENSBTAG00000002059	RRAGD/PHF3/SMAP1/KCNQ5/HDDC2/bta-mir-2477/MCM9
	3209712	38390537	9	ENSBTAG00000038190/ENSBTAG00000007791/ENSBTAG00000003340/ENSBTAG00000044951/ENSBTAG00000002059	SMAP1/KCNQ5/HDDC2/bta-mir-2477/MCM9
	4808685	28949835	9	ENSBTAG00000038190/ENSBTAG00000007791/ENSBTAG00000003340/ENSBTAG00000044951	SMAP1/KCNQ5/HDDC2/bta-mir-2477
	8329551	11972126	9	ENSBTAG00000038190	SMAP1
	27896295	69290334	9	ENSBTAG00000018438/ENSBTAG00000002059	RRAGD/MCM9
	30006014	32723535	9	ENSBTAG00000002059	MCM9
	38460906	101340656	9	ENSBTAG00000018438/ENSBTAG00000011593	RRAGD/QKI
	60385069	63693351	9	ENSBTAG00000018438	RRAGD
	78576880	105587941	9	ENSBTAG00000011593	QKI
	41893	102813194	10	ENSBTAG00000045604/ENSBTAG00000008287/ENSBTAG00000006463/ENSBTAG00000003084/ENSBTAG00000043636/ENSBTAG00000021538/ENSBTAG00000003469/ENSBTAG00000005897	TTC9/YLPM1/DLST/GPATCH2L/U2/MYO1E/CHURC1/FNTB
	24301480	55904933	10	ENSBTAG00000043636/ENSBTAG00000021538	U2/MYO1E
	27722810	77053269	10	ENSBTAG00000043636/ENSBTAG00000021538/ENSBTAG00000003469	U2/MYO1E/CHURC1
	30774096	33385244	10	ENSBTAG00000043636	U2
	33285502	90869856	10	ENSBTAG00000045604/ENSBTAG00000008287/ENSBTAG00000006463/ENSBTAG00000003084/ENSBTAG00000021538/ENSBTAG00000003469/ENSBTAG00000005897	TTC9/YLPM1/DLST/GPATCH2L/MYO1E/CHURC1/FNTB
	35479280	87139659	10	ENSBTAG00000045604/ENSBTAG00000008287/ENSBTAG00000006463/ENSBTAG00000021538/ENSBTAG00000003469/ENSBTAG00000005897	TTC9/YLPM1/DLST/MYO1E/CHURC1/FNTB
	37830642	77091346	10	ENSBTAG00000021538/ENSBTAG00000003469	MYO1E/CHURC1
	48541387	80910121	10	ENSBTAG00000021538/ENSBTAG00000003469/ENSBTAG00000005897	MYO1E/CHURC1/FNTB
	48837583	85944517	10	ENSBTAG00000045604/ENSBTAG00000021538/ENSBTAG00000003469/ENSBTAG00000005897	TTC9/MYO1E/CHURC1/FNTB
	51073291	52836817	10	ENSBTAG00000021538	MYO1E
	54082665	77053269	10	ENSBTAG00000003469	CHURC1
	65970755	91580758	10	ENSBTAG00000045604/ENSBTAG00000008287/ENSBTAG00000006463/ENSBTAG00000003084/ENSBTAG00000003469/ENSBTAG00000005897	TTC9/YLPM1/DLST/GPATCH2L/CHURC1/FNTB
	65970755	84388256	10	ENSBTAG00000045604/ENSBTAG00000003469/ENSBTAG00000005897	TTC9/CHURC1/FNTB
	74032819	87383905	10	ENSBTAG00000045604/ENSBTAG00000008287/ENSBTAG00000006463/ENSBTAG00000003469/ENSBTAG00000005897	TTC9/YLPM1/DLST/CHURC1/FNTB
	77143173	82496702	10	ENSBTAG00000045604/ENSBTAG00000005897	TTC9/FNTB
	77143173	89081278	10	ENSBTAG00000045604/ENSBTAG00000008287/ENSBTAG00000006463/ENSBTAG00000003084/ENSBTAG00000005897	TTC9/YLPM1/DLST/GPATCH2L/FNTB
	80484843	94459855	10	ENSBTAG00000045604/ENSBTAG00000008287/ENSBTAG00000006463/ENSBTAG00000003084	TTC9/YLPM1/DLST/GPATCH2L
	80910121	87411126	10	ENSBTAG00000045604/ENSBTAG00000008287/ENSBTAG00000006463	TTC9/YLPM1/DLST
	81549606	83808721	10	ENSBTAG00000045604	TTC9
	82444410	86036359	10	ENSBTAG00000008287	YLPM1
	83843832	89351922	10	ENSBTAG00000008287/ENSBTAG00000006463/ENSBTAG00000003084	YLPM1/DLST/GPATCH2L
	84736927	86654970	10	ENSBTAG00000008287/ENSBTAG00000006463	YLPM1/DLST
	86155673	89977021	10	ENSBTAG00000006463/ENSBTAG00000003084	DLST/GPATCH2L
	87334868	90201001	10	ENSBTAG00000003084	GPATCH2L
	39943	22201316	11	ENSBTAG00000005273/ENSBTAG00000005704/ENSBTAG00000001706/ENSBTAG00000038462/ENSBTAG00000050078/ENSBTAG00000020799/ENSBTAG00000000783/ENSBTAG00000019839/ENSBTAG00000024980	IL1R1/IL1RL2/SLC9A2/TMEM182/SFXN5/EXOC6B/TGFA/LTBP1/VIT
	39943	26084750	11	ENSBTAG00000005273/ENSBTAG00000005704/ENSBTAG00000001706/ENSBTAG00000038462/ENSBTAG00000050078/ENSBTAG00000020799/ENSBTAG00000000783/ENSBTAG00000019839/ENSBTAG00000024980/ENSBTAG00000004073	IL1R1/IL1RL2/SLC9A2/TMEM182/SFXN5/EXOC6B/TGFA/LTBP1/VIT/MTA3
	68565	107246475	11	ENSBTAG00000020614/ENSBTAG00000013675/ENSBTAG00000047998/ENSBTAG00000052518/ENSBTAG00000021861/ENSBTAG00000023787/ENSBTAG00000005273/ENSBTAG00000005704/ENSBTAG00000001706/ENSBTAG00000038462/ENSBTAG00000050078/ENSBTAG00000020799/ENSBTAG00000000783/ENSBTAG00000019839/ENSBTAG00000024980/ENSBTAG00000004073	PRKCE/IL37/COL5A1/TUBB4B/NELFB/TOR4A/IL1R1/IL1RL2/SLC9A2/TMEM182/SFXN5/EXOC6B/TGFA/LTBP1/VIT/MTA3
	68565	45584828	11	ENSBTAG00000020614/ENSBTAG00000005273/ENSBTAG00000005704/ENSBTAG00000001706/ENSBTAG00000038462/ENSBTAG00000050078/ENSBTAG00000020799/ENSBTAG00000000783/ENSBTAG00000019839/ENSBTAG00000024980/ENSBTAG00000004073	PRKCE/IL1R1/IL1RL2/SLC9A2/TMEM182/SFXN5/EXOC6B/TGFA/LTBP1/VIT/MTA3
	68565	76354822	11	ENSBTAG00000020614/ENSBTAG00000013675/ENSBTAG00000005273/ENSBTAG00000005704/ENSBTAG00000001706/ENSBTAG00000038462/ENSBTAG00000050078/ENSBTAG00000020799/ENSBTAG00000000783/ENSBTAG00000019839/ENSBTAG00000024980/ENSBTAG00000004073	PRKCE/IL37/IL1R1/IL1RL2/SLC9A2/TMEM182/SFXN5/EXOC6B/TGFA/LTBP1/VIT/MTA3
	4875412	16954791	11	ENSBTAG00000005273/ENSBTAG00000005704/ENSBTAG00000001706/ENSBTAG00000038462/ENSBTAG00000050078/ENSBTAG00000020799/ENSBTAG00000000783/ENSBTAG00000019839	IL1R1/IL1RL2/SLC9A2/TMEM182/SFXN5/EXOC6B/TGFA/LTBP1
	6621626	9550147	11	ENSBTAG00000005273/ENSBTAG00000005704/ENSBTAG00000001706/ENSBTAG00000038462	IL1R1/IL1RL2/SLC9A2/TMEM182
	7635078	27526256	11	ENSBTAG00000050078/ENSBTAG00000020799/ENSBTAG00000000783/ENSBTAG00000019839/ENSBTAG00000024980/ENSBTAG00000004073	SFXN5/EXOC6B/TGFA/LTBP1/VIT/MTA3
	8042280	20994163	11	ENSBTAG00000050078/ENSBTAG00000020799/ENSBTAG00000000783/ENSBTAG00000019839/ENSBTAG00000024980	SFXN5/EXOC6B/TGFA/LTBP1/VIT
	8763389	18446256	11	ENSBTAG00000050078/ENSBTAG00000020799/ENSBTAG00000000783/ENSBTAG00000019839	SFXN5/EXOC6B/TGFA/LTBP1
	9473158	11540044	11	ENSBTAG00000050078	SFXN5
	10985610	13009587	11	ENSBTAG00000050078/ENSBTAG00000020799	SFXN5/EXOC6B
	11209209	13914771	11	ENSBTAG00000050078/ENSBTAG00000020799/ENSBTAG00000000783	SFXN5/EXOC6B/TGFA
	12948492	14210766	11	ENSBTAG00000000783	TGFA
	13450833	20994163	11	ENSBTAG00000000783/ENSBTAG00000019839/ENSBTAG00000024980	TGFA/LTBP1/VIT
	15857007	22183061	11	ENSBTAG00000019839/ENSBTAG00000024980	LTBP1/VIT
	15857007	27385912	11	ENSBTAG00000019839/ENSBTAG00000024980/ENSBTAG00000004073	LTBP1/VIT/MTA3
	17617527	20579115	11	ENSBTAG00000024980	VIT
	19971032	50170608	11	ENSBTAG00000020614/ENSBTAG00000013675/ENSBTAG00000004073	PRKCE/IL37/MTA3
	24102073	28333085	11	ENSBTAG00000020614/ENSBTAG00000004073	PRKCE/MTA3
	25092349	27291482	11	ENSBTAG00000004073	MTA3
	26235778	62847615	11	ENSBTAG00000020614/ENSBTAG00000013675	PRKCE/IL37
	27257304	29326683	11	ENSBTAG00000020614	PRKCE
	46307696	48425269	11	ENSBTAG00000013675	IL37
	91068648	107246475	11	ENSBTAG00000047998/ENSBTAG00000052518/ENSBTAG00000021861/ENSBTAG00000023787	COL5A1/TUBB4B/NELFB/TOR4A
	13400067	21073393	12	ENSBTAG00000016691	LACC1
	16580958	70164800	12	ENSBTAG00000021815/ENSBTAG00000015943/ENSBTAG00000006177/ENSBTAG00000003314/ENSBTAG00000010129	STARD13/MICU2/ZDHHC20/SKA3/SLITRK5
	25775588	29343428	12	ENSBTAG00000021815	STARD13
	26833690	61168243	12	ENSBTAG00000021815/ENSBTAG00000015943/ENSBTAG00000006177/ENSBTAG00000003314	STARD13/MICU2/ZDHHC20/SKA3
	30889096	81784137	12	ENSBTAG00000015943/ENSBTAG00000006177/ENSBTAG00000003314/ENSBTAG00000010129/ENSBTAG00000020389	MICU2/ZDHHC20/SKA3/SLITRK5/TPP2
	32740176	64002872	12	ENSBTAG00000015943/ENSBTAG00000006177/ENSBTAG00000003314/ENSBTAG00000010129	MICU2/ZDHHC20/SKA3/SLITRK5
	34395464	37506351	12	ENSBTAG00000015943/ENSBTAG00000006177/ENSBTAG00000003314	MICU2/ZDHHC20/SKA3
	39249662	70812571	12	ENSBTAG00000010129	SLITRK5
	40558862	91131021	12	ENSBTAG00000010129/ENSBTAG00000020389/ENSBTAG00000018237	SLITRK5/TPP2/MYO16
	77695384	86535900	12	ENSBTAG00000020389/ENSBTAG00000018237	TPP2/MYO16
	77816640	81540197	12	ENSBTAG00000020389	TPP2
	83696121	85926556	12	ENSBTAG00000018237	MYO16
	33877	21666811	13	ENSBTAG00000009475/ENSBTAG00000008338	PLXDC2/PLCB1
	33877	52785121	13	ENSBTAG00000009475/ENSBTAG00000020454/ENSBTAG00000015379/ENSBTAG00000051021/ENSBTAG00000008027/ENSBTAG00000008338	PLXDC2/LZTS3/UBOX5/FASTKD5/AVP/PLCB1
	33877	72842894	13	ENSBTAG00000009475/ENSBTAG00000002593/ENSBTAG00000013220/ENSBTAG00000020454/ENSBTAG00000015379/ENSBTAG00000051021/ENSBTAG00000008027/ENSBTAG00000008338	PLXDC2/GDAP1L1/R3HDML/LZTS3/UBOX5/FASTKD5/AVP/PLCB1
	313308	7564399	13	ENSBTAG00000008338	PLCB1
	11827726	80428308	13	ENSBTAG00000009475/ENSBTAG00000002593/ENSBTAG00000013220/ENSBTAG00000018122/ENSBTAG00000013950/ENSBTAG00000002942/ENSBTAG00000006671/ENSBTAG00000020454/ENSBTAG00000015379/ENSBTAG00000051021/ENSBTAG00000008027	PLXDC2/GDAP1L1/R3HDML/TKDP1/TKDP4/SLC2A10/DDX27/LZTS3/UBOX5/FASTKD5/AVP
	13706672	54742445	13	ENSBTAG00000009475/ENSBTAG00000020454/ENSBTAG00000015379/ENSBTAG00000051021/ENSBTAG00000008027	PLXDC2/LZTS3/UBOX5/FASTKD5/AVP
	18268908	22308682	13	ENSBTAG00000009475	PLXDC2
	24269841	76330479	13	ENSBTAG00000002593/ENSBTAG00000013220/ENSBTAG00000018122/ENSBTAG00000013950/ENSBTAG00000002942/ENSBTAG00000020454/ENSBTAG00000015379/ENSBTAG00000051021/ENSBTAG00000008027	GDAP1L1/R3HDML/TKDP1/TKDP4/SLC2A10/LZTS3/UBOX5/FASTKD5/AVP
	49122506	82240934	13	ENSBTAG00000002593/ENSBTAG00000013220/ENSBTAG00000018122/ENSBTAG00000013950/ENSBTAG00000002942/ENSBTAG00000006671/ENSBTAG00000020454/ENSBTAG00000015379/ENSBTAG00000051021/ENSBTAG00000008027	GDAP1L1/R3HDML/TKDP1/TKDP4/SLC2A10/DDX27/LZTS3/UBOX5/FASTKD5/AVP
	50469714	53045127	13	ENSBTAG00000020454/ENSBTAG00000015379/ENSBTAG00000051021/ENSBTAG00000008027	LZTS3/UBOX5/FASTKD5/AVP
	54167722	72927026	13	ENSBTAG00000002593/ENSBTAG00000013220	GDAP1L1/R3HDML
	56532232	82621346	13	ENSBTAG00000002593/ENSBTAG00000013220/ENSBTAG00000018122/ENSBTAG00000013950/ENSBTAG00000002942/ENSBTAG00000006671	GDAP1L1/R3HDML/TKDP1/TKDP4/SLC2A10/DDX27
	66467827	76261073	13	ENSBTAG00000002593/ENSBTAG00000013220/ENSBTAG00000018122/ENSBTAG00000013950/ENSBTAG00000002942	GDAP1L1/R3HDML/TKDP1/TKDP4/SLC2A10
	72674575	74887589	13	ENSBTAG00000002593/ENSBTAG00000013220/ENSBTAG00000018122/ENSBTAG00000013950	GDAP1L1/R3HDML/TKDP1/TKDP4
	73021818	75693756	13	ENSBTAG00000018122/ENSBTAG00000013950/ENSBTAG00000002942	TKDP1/TKDP4/SLC2A10
	73021818	75240419	13	ENSBTAG00000018122/ENSBTAG00000013950	TKDP1/TKDP4
	73168309	84230359	13	ENSBTAG00000018122/ENSBTAG00000013950/ENSBTAG00000002942/ENSBTAG00000006671	TKDP1/TKDP4/SLC2A10/DDX27
	74205282	84230359	13	ENSBTAG00000002942/ENSBTAG00000006671	SLC2A10/DDX27
	75310875	77319144	13	ENSBTAG00000002942	SLC2A10
	76841156	84176216	13	ENSBTAG00000006671	DDX27
	74984	2625668	14	ENSBTAG00000009974	TSNARE1
	74984	2853845	14	ENSBTAG00000009974/ENSBTAG00000009578	TSNARE1/PTK2
	74984	8659069	14	ENSBTAG00000009974/ENSBTAG00000009578/ENSBTAG00000013955/ENSBTAG00000010548	TSNARE1/PTK2/TRAPPC9/LRRC6
	74984	9646197	14	ENSBTAG00000009974/ENSBTAG00000009578/ENSBTAG00000013955/ENSBTAG00000010548/ENSBTAG00000020667/ENSBTAG00000034196	TSNARE1/PTK2/TRAPPC9/LRRC6/KCNQ3/HHLA1
	1435005	4672500	14	ENSBTAG00000009974/ENSBTAG00000009578/ENSBTAG00000013955	TSNARE1/PTK2/TRAPPC9
	9038049	25832112	14	ENSBTAG00000034196/ENSBTAG00000014600	HHLA1/ADCY8
	9964138	11659369	14	ENSBTAG00000014600	ADCY8
	20241456	84628243	14	ENSBTAG00000047532/ENSBTAG00000006770/ENSBTAG00000007302/ENSBTAG00000004411/ENSBTAG00000017694/ENSBTAG00000038281/ENSBTAG00000033902/ENSBTAG00000026963/ENSBTAG00000046358	TRIQK/MTBP/SLC2A5/CRISPLD1/TRPS1/CSMD3/SLC25A32/NCALD/PABPC1
	23603843	58640687	14	ENSBTAG00000004411/ENSBTAG00000017694/ENSBTAG00000038281	CRISPLD1/TRPS1/CSMD3
	23603843	77610030	14	ENSBTAG00000047532/ENSBTAG00000004411/ENSBTAG00000017694/ENSBTAG00000038281/ENSBTAG00000033902/ENSBTAG00000026963/ENSBTAG00000046358	TRIQK/CRISPLD1/TRPS1/CSMD3/SLC25A32/NCALD/PABPC1
	24222338	81891283	14	ENSBTAG00000047532/ENSBTAG00000006770/ENSBTAG00000004411/ENSBTAG00000017694/ENSBTAG00000038281/ENSBTAG00000033902/ENSBTAG00000026963/ENSBTAG00000046358	TRIQK/MTBP/CRISPLD1/TRPS1/CSMD3/SLC25A32/NCALD/PABPC1
	25708285	61100170	14	ENSBTAG00000004411/ENSBTAG00000017694/ENSBTAG00000038281/ENSBTAG00000033902	CRISPLD1/TRPS1/CSMD3/SLC25A32
	35473110	43069802	14	ENSBTAG00000004411	CRISPLD1
	36403095	70590801	14	ENSBTAG00000004411/ENSBTAG00000017694/ENSBTAG00000038281/ENSBTAG00000033902/ENSBTAG00000026963/ENSBTAG00000046358	CRISPLD1/TRPS1/CSMD3/SLC25A32/NCALD/PABPC1
	38440957	84616190	14	ENSBTAG00000047532/ENSBTAG00000006770/ENSBTAG00000007302/ENSBTAG00000017694/ENSBTAG00000038281/ENSBTAG00000033902/ENSBTAG00000026963/ENSBTAG00000046358	TRIQK/MTBP/SLC2A5/TRPS1/CSMD3/SLC25A32/NCALD/PABPC1
	40967636	62253952	14	ENSBTAG00000017694/ENSBTAG00000038281/ENSBTAG00000033902	TRPS1/CSMD3/SLC25A32
	45742560	82028369	14	ENSBTAG00000047532/ENSBTAG00000006770/ENSBTAG00000017694/ENSBTAG00000038281/ENSBTAG00000033902/ENSBTAG00000026963/ENSBTAG00000046358	TRIQK/MTBP/TRPS1/CSMD3/SLC25A32/NCALD/PABPC1
	47233282	51361589	14	ENSBTAG00000017694/ENSBTAG00000038281	TRPS1/CSMD3
	47233282	66549130	14	ENSBTAG00000017694/ENSBTAG00000038281/ENSBTAG00000033902/ENSBTAG00000026963/ENSBTAG00000046358	TRPS1/CSMD3/SLC25A32/NCALD/PABPC1
	47233282	73467089	14	ENSBTAG00000047532/ENSBTAG00000017694/ENSBTAG00000038281/ENSBTAG00000033902/ENSBTAG00000026963/ENSBTAG00000046358	TRIQK/TRPS1/CSMD3/SLC25A32/NCALD/PABPC1
	47368746	50452986	14	ENSBTAG00000017694	TRPS1
	49145267	51956205	14	ENSBTAG00000038281	CSMD3
	49193808	70229610	14	ENSBTAG00000038281/ENSBTAG00000033902/ENSBTAG00000026963/ENSBTAG00000046358	CSMD3/SLC25A32/NCALD/PABPC1
	51627238	61936595	14	ENSBTAG00000038281/ENSBTAG00000033902	CSMD3/SLC25A32
	55173462	74185212	14	ENSBTAG00000047532/ENSBTAG00000033902/ENSBTAG00000026963/ENSBTAG00000046358	TRIQK/SLC25A32/NCALD/PABPC1
	56529013	70570164	14	ENSBTAG00000033902/ENSBTAG00000026963/ENSBTAG00000046358	SLC25A32/NCALD/PABPC1
	57607935	61100170	14	ENSBTAG00000033902	SLC25A32
	60570338	62830899	14	ENSBTAG00000033902/ENSBTAG00000026963	SLC25A32/NCALD
	61175089	84540458	14	ENSBTAG00000047532/ENSBTAG00000006770/ENSBTAG00000007302/ENSBTAG00000026963/ENSBTAG00000046358	TRIQK/MTBP/SLC2A5/NCALD/PABPC1
	62409026	74053080	14	ENSBTAG00000047532/ENSBTAG00000026963/ENSBTAG00000046358	TRIQK/NCALD/PABPC1
	62676800	65371958	14	ENSBTAG00000026963/ENSBTAG00000046358	NCALD/PABPC1
	68517318	81891283	14	ENSBTAG00000047532/ENSBTAG00000006770	TRIQK/MTBP
	68817604	84358672	14	ENSBTAG00000047532/ENSBTAG00000006770/ENSBTAG00000007302	TRIQK/MTBP/SLC2A5
	70526189	73285969	14	ENSBTAG00000047532	TRIQK
	73629815	82726023	14	ENSBTAG00000006770/ENSBTAG00000007302	MTBP/SLC2A5
	77842263	82273602	14	ENSBTAG00000006770	MTBP
	81965479	84628243	14	ENSBTAG00000007302	SLC2A5
	74750	4039184	15	ENSBTAG00000005392	KBTBD3
	812701	85257312	15	ENSBTAG00000004206/ENSBTAG00000005392/ENSBTAG00000034827/ENSBTAG00000021855	LRRC55/KBTBD3/PDGFD/ANO3
	812701	54898376	15	ENSBTAG00000005392/ENSBTAG00000034827	KBTBD3/PDGFD
	3224283	4395956	15	ENSBTAG00000034827	PDGFD
	39177823	85257312	15	ENSBTAG00000004206/ENSBTAG00000021855	LRRC55/ANO3
	54769019	57313281	15	ENSBTAG00000021855	ANO3
	61528298	82372188	15	ENSBTAG00000004206	LRRC55
	35920	27271296	16	ENSBTAG00000011461/ENSBTAG00000012778	ADORA1/CAPN2
	35920	41131268	16	ENSBTAG00000033180/ENSBTAG00000011461/ENSBTAG00000012778/ENSBTAG00000024560/ENSBTAG00000013949	SMYD3/ADORA1/CAPN2/STUM/AHCTF1
	73143	6705937	16	ENSBTAG00000011461	ADORA1
	15241094	28684222	16	ENSBTAG00000012778	CAPN2
	17678224	30480499	16	ENSBTAG00000012778/ENSBTAG00000024560/ENSBTAG00000013949	CAPN2/STUM/AHCTF1
	20868185	41016073	16	ENSBTAG00000033180/ENSBTAG00000012778/ENSBTAG00000024560/ENSBTAG00000013949	SMYD3/CAPN2/STUM/AHCTF1
	21443335	61417656	16	ENSBTAG00000033180/ENSBTAG00000012778/ENSBTAG00000024560/ENSBTAG00000013949/ENSBTAG00000015650	SMYD3/CAPN2/STUM/AHCTF1/TNN
	21551688	81322588	16	ENSBTAG00000033180/ENSBTAG00000008153/ENSBTAG00000012778/ENSBTAG00000024560/ENSBTAG00000013949/ENSBTAG00000015650	SMYD3/CAMSAP2/CAPN2/STUM/AHCTF1/TNN
	27187176	81688070	16	ENSBTAG00000033180/ENSBTAG00000008153/ENSBTAG00000024560/ENSBTAG00000013949/ENSBTAG00000015650	SMYD3/CAMSAP2/STUM/AHCTF1/TNN
	27564388	30510852	16	ENSBTAG00000024560/ENSBTAG00000013949	STUM/AHCTF1
	27671754	49355913	16	ENSBTAG00000033180/ENSBTAG00000024560/ENSBTAG00000013949	SMYD3/STUM/AHCTF1
	29600490	74741746	16	ENSBTAG00000033180/ENSBTAG00000024560/ENSBTAG00000013949/ENSBTAG00000015650	SMYD3/STUM/AHCTF1/TNN
	29812601	32019139	16	ENSBTAG00000033180/ENSBTAG00000013949	SMYD3/AHCTF1
	30787944	32789225	16	ENSBTAG00000033180	SMYD3
	53803470	57545177	16	ENSBTAG00000015650	TNN
	55606873	81220660	16	ENSBTAG00000008153/ENSBTAG00000015650	CAMSAP2/TNN
	77110928	81322588	16	ENSBTAG00000008153	CAMSAP2
	81655	27097698	17	ENSBTAG00000024545/ENSBTAG00000014111/ENSBTAG00000011373/ENSBTAG00000003581	DCHS2/INPP4B/MAML3/SETD7
	974980	5323939	17	ENSBTAG00000024545	DCHS2
	6027926	18064688	17	ENSBTAG00000014111/ENSBTAG00000011373	INPP4B/MAML3
	6921190	21464235	17	ENSBTAG00000014111/ENSBTAG00000011373/ENSBTAG00000003581	INPP4B/MAML3/SETD7
	12647602	15577659	17	ENSBTAG00000014111	INPP4B
	16441272	48703634	17	ENSBTAG00000011373/ENSBTAG00000003581/ENSBTAG00000053029/ENSBTAG00000013001/ENSBTAG00000005644/ENSBTAG00000002950	MAML3/SETD7/ZNF26/ZNF84/GALNT9/TMEM132D
	16671727	19531885	17	ENSBTAG00000011373/ENSBTAG00000003581	MAML3/SETD7
	17926492	62223385	17	ENSBTAG00000044119/ENSBTAG00000006666/ENSBTAG00000006659/ENSBTAG00000011373/ENSBTAG00000003581/ENSBTAG00000053029/ENSBTAG00000013001/ENSBTAG00000005644/ENSBTAG00000002950	KSR2/NAA25/TMEM116/MAML3/SETD7/ZNF26/ZNF84/GALNT9/TMEM132D
	27459029	65393511	17	ENSBTAG00000044119/ENSBTAG00000006666/ENSBTAG00000006659/ENSBTAG00000021168/ENSBTAG00000053029/ENSBTAG00000013001/ENSBTAG00000005644/ENSBTAG00000002950	KSR2/NAA25/TMEM116/SIRT4/ZNF26/ZNF84/GALNT9/TMEM132D
	30540080	62572396	17	ENSBTAG00000044119/ENSBTAG00000006666/ENSBTAG00000006659/ENSBTAG00000053029/ENSBTAG00000013001/ENSBTAG00000005644/ENSBTAG00000002950	KSR2/NAA25/TMEM116/ZNF26/ZNF84/GALNT9/TMEM132D
	33638999	61311307	17	ENSBTAG00000044119/ENSBTAG00000053029/ENSBTAG00000013001/ENSBTAG00000005644/ENSBTAG00000002950	KSR2/ZNF26/ZNF84/GALNT9/TMEM132D
	38840539	44036609	17	ENSBTAG00000053029	ZNF26
	41710814	44065527	17	ENSBTAG00000053029/ENSBTAG00000013001	ZNF26/ZNF84
	42265638	47700237	17	ENSBTAG00000053029/ENSBTAG00000013001/ENSBTAG00000005644/ENSBTAG00000002950	ZNF26/ZNF84/GALNT9/TMEM132D
	42688661	47334911	17	ENSBTAG00000053029/ENSBTAG00000013001/ENSBTAG00000005644	ZNF26/ZNF84/GALNT9
	44164743	75132928	17	ENSBTAG00000044119/ENSBTAG00000006666/ENSBTAG00000006659/ENSBTAG00000021168/ENSBTAG00000005644/ENSBTAG00000002950	KSR2/NAA25/TMEM116/SIRT4/GALNT9/TMEM132D
	44463115	47309946	17	ENSBTAG00000005644	GALNT9
	46325733	48747216	17	ENSBTAG00000002950	TMEM132D
	47231756	75132928	17	ENSBTAG00000044119/ENSBTAG00000006666/ENSBTAG00000006659/ENSBTAG00000021168/ENSBTAG00000002950	KSR2/NAA25/TMEM116/SIRT4/TMEM132D
	53380564	73678846	17	ENSBTAG00000044119/ENSBTAG00000006666/ENSBTAG00000006659/ENSBTAG00000021168	KSR2/NAA25/TMEM116/SIRT4
	57251180	59704530	17	ENSBTAG00000044119	KSR2
	61401502	75058715	17	ENSBTAG00000006666/ENSBTAG00000006659/ENSBTAG00000021168	NAA25/TMEM116/SIRT4
	62433322	65297499	17	ENSBTAG00000021168	SIRT4
	44799	15547815	18	ENSBTAG00000001872/ENSBTAG00000007184/ENSBTAG00000015894/ENSBTAG00000053436/ENSBTAG00000004248	ORC6/NUDT7/WWOX/HSBP1/MLYCD
	44799	22714054	18	ENSBTAG00000001872/ENSBTAG00000007942/ENSBTAG00000012501/ENSBTAG00000007184/ENSBTAG00000015894/ENSBTAG00000053436/ENSBTAG00000004248	ORC6/TENT4B/FTO/NUDT7/WWOX/HSBP1/MLYCD
	44799	45044333	18	ENSBTAG00000001872/ENSBTAG00000007942/ENSBTAG00000012501/ENSBTAG00000039441/ENSBTAG00000023614/ENSBTAG00000019266/ENSBTAG00000007184/ENSBTAG00000015894/ENSBTAG00000053436/ENSBTAG00000004248	ORC6/TENT4B/FTO/RGS9BP/NUDT19/TDRD12/NUDT7/WWOX/HSBP1/MLYCD
	44799	63658148	18	ENSBTAG00000001872/ENSBTAG00000007942/ENSBTAG00000012501/ENSBTAG00000009785/ENSBTAG00000020429/ENSBTAG00000008573/ENSBTAG00000004017/ENSBTAG00000052512/ENSBTAG00000010467/ENSBTAG00000018882/ENSBTAG00000023434/ENSBTAG00000039441/ENSBTAG00000023614/ENSBTAG00000019266/ENSBTAG00000007184/ENSBTAG00000015894/ENSBTAG00000053436/ENSBTAG00000004248	ORC6/TENT4B/FTO/SAMD4B/MED29/ZFP36/PLEKHG2/IL-15L/SUPT5H/BSP5/BSP1/RGS9BP/NUDT19/TDRD12/NUDT7/WWOX/HSBP1/MLYCD
	44799	65978584	18	ENSBTAG00000001872/ENSBTAG00000007942/ENSBTAG00000038947/ENSBTAG00000039946/ENSBTAG00000012501/ENSBTAG00000009785/ENSBTAG00000020429/ENSBTAG00000008573/ENSBTAG00000004017/ENSBTAG00000052512/ENSBTAG00000010467/ENSBTAG00000018882/ENSBTAG00000023434/ENSBTAG00000039441/ENSBTAG00000023614/ENSBTAG00000019266/ENSBTAG00000007184/ENSBTAG00000015894/ENSBTAG00000053436/ENSBTAG00000004248	ORC6/TENT4B/ZSCAN4/ZNF814/FTO/SAMD4B/MED29/ZFP36/PLEKHG2/IL-15L/SUPT5H/BSP5/BSP1/RGS9BP/NUDT19/TDRD12/NUDT7/WWOX/HSBP1/MLYCD
	252557	10783360	18	ENSBTAG00000007184/ENSBTAG00000015894/ENSBTAG00000053436/ENSBTAG00000004248	NUDT7/WWOX/HSBP1/MLYCD
	1953309	5101055	18	ENSBTAG00000007184	NUDT7
	2864232	5473290	18	ENSBTAG00000007184/ENSBTAG00000015894	NUDT7/WWOX
	5939925	29181633	18	ENSBTAG00000001872/ENSBTAG00000007942/ENSBTAG00000012501/ENSBTAG00000015894/ENSBTAG00000053436/ENSBTAG00000004248	ORC6/TENT4B/FTO/WWOX/HSBP1/MLYCD
	5962238	15561600	18	ENSBTAG00000001872/ENSBTAG00000015894/ENSBTAG00000053436/ENSBTAG00000004248	ORC6/WWOX/HSBP1/MLYCD
	7014208	18889566	18	ENSBTAG00000001872/ENSBTAG00000007942/ENSBTAG00000053436/ENSBTAG00000004248	ORC6/TENT4B/HSBP1/MLYCD
	8326812	27121621	18	ENSBTAG00000001872/ENSBTAG00000007942/ENSBTAG00000012501/ENSBTAG00000053436/ENSBTAG00000004248	ORC6/TENT4B/FTO/HSBP1/MLYCD
	8765998	48818621	18	ENSBTAG00000001872/ENSBTAG00000007942/ENSBTAG00000012501/ENSBTAG00000039441/ENSBTAG00000023614/ENSBTAG00000019266/ENSBTAG00000053436/ENSBTAG00000004248	ORC6/TENT4B/FTO/RGS9BP/NUDT19/TDRD12/HSBP1/MLYCD
	9487375	17988032	18	ENSBTAG00000001872/ENSBTAG00000053436/ENSBTAG00000004248	ORC6/HSBP1/MLYCD
	9670662	62708688	18	ENSBTAG00000001872/ENSBTAG00000007942/ENSBTAG00000012501/ENSBTAG00000009785/ENSBTAG00000020429/ENSBTAG00000008573/ENSBTAG00000004017/ENSBTAG00000052512/ENSBTAG00000010467/ENSBTAG00000018882/ENSBTAG00000023434/ENSBTAG00000039441/ENSBTAG00000023614/ENSBTAG00000019266/ENSBTAG00000053436/ENSBTAG00000004248	ORC6/TENT4B/FTO/SAMD4B/MED29/ZFP36/PLEKHG2/IL-15L/SUPT5H/BSP5/BSP1/RGS9BP/NUDT19/TDRD12/HSBP1/MLYCD
	10117349	13276830	18	ENSBTAG00000053436/ENSBTAG00000004248	HSBP1/MLYCD
	10210942	13276830	18	ENSBTAG00000004248	MLYCD
	10708311	15834073	18	ENSBTAG00000001872	ORC6
	11598870	20686738	18	ENSBTAG00000001872/ENSBTAG00000007942	ORC6/TENT4B
	13346768	28139889	18	ENSBTAG00000001872/ENSBTAG00000007942/ENSBTAG00000012501	ORC6/TENT4B/FTO
	15225943	65978584	18	ENSBTAG00000007942/ENSBTAG00000038947/ENSBTAG00000039946/ENSBTAG00000012501/ENSBTAG00000009785/ENSBTAG00000020429/ENSBTAG00000008573/ENSBTAG00000004017/ENSBTAG00000052512/ENSBTAG00000010467/ENSBTAG00000018882/ENSBTAG00000023434/ENSBTAG00000039441/ENSBTAG00000023614/ENSBTAG00000019266	TENT4B/ZSCAN4/ZNF814/FTO/SAMD4B/MED29/ZFP36/PLEKHG2/IL-15L/SUPT5H/BSP5/BSP1/RGS9BP/NUDT19/TDRD12
	15745432	23196347	18	ENSBTAG00000007942/ENSBTAG00000012501	TENT4B/FTO
	16488570	46641574	18	ENSBTAG00000007942/ENSBTAG00000012501/ENSBTAG00000039441/ENSBTAG00000023614/ENSBTAG00000019266	TENT4B/FTO/RGS9BP/NUDT19/TDRD12
	18217505	20765346	18	ENSBTAG00000007942	TENT4B
	19173818	24421799	18	ENSBTAG00000012501	FTO
	20689048	63054392	18	ENSBTAG00000012501/ENSBTAG00000009785/ENSBTAG00000020429/ENSBTAG00000008573/ENSBTAG00000004017/ENSBTAG00000052512/ENSBTAG00000010467/ENSBTAG00000018882/ENSBTAG00000023434/ENSBTAG00000039441/ENSBTAG00000023614/ENSBTAG00000019266	FTO/SAMD4B/MED29/ZFP36/PLEKHG2/IL-15L/SUPT5H/BSP5/BSP1/RGS9BP/NUDT19/TDRD12
	22489013	62658789	18	ENSBTAG00000009785/ENSBTAG00000020429/ENSBTAG00000008573/ENSBTAG00000004017/ENSBTAG00000052512/ENSBTAG00000010467/ENSBTAG00000018882/ENSBTAG00000023434/ENSBTAG00000039441/ENSBTAG00000023614/ENSBTAG00000019266	SAMD4B/MED29/ZFP36/PLEKHG2/IL-15L/SUPT5H/BSP5/BSP1/RGS9BP/NUDT19/TDRD12
	28520867	43165294	18	ENSBTAG00000039441	RGS9BP
	29362150	65978584	18	ENSBTAG00000038947/ENSBTAG00000039946/ENSBTAG00000009785/ENSBTAG00000020429/ENSBTAG00000008573/ENSBTAG00000004017/ENSBTAG00000052512/ENSBTAG00000010467/ENSBTAG00000018882/ENSBTAG00000023434/ENSBTAG00000039441/ENSBTAG00000023614/ENSBTAG00000019266	ZSCAN4/ZNF814/SAMD4B/MED29/ZFP36/PLEKHG2/IL-15L/SUPT5H/BSP5/BSP1/RGS9BP/NUDT19/TDRD12
	40938198	44208859	18	ENSBTAG00000039441/ENSBTAG00000023614/ENSBTAG00000019266	RGS9BP/NUDT19/TDRD12
	46641574	49690172	18	ENSBTAG00000009785/ENSBTAG00000020429/ENSBTAG00000008573/ENSBTAG00000004017/ENSBTAG00000052512/ENSBTAG00000010467	SAMD4B/MED29/ZFP36/PLEKHG2/IL-15L/SUPT5H
	48150900	51896291	18	ENSBTAG00000009785/ENSBTAG00000020429/ENSBTAG00000008573/ENSBTAG00000004017/ENSBTAG00000052512/ENSBTAG00000010467/ENSBTAG00000018882/ENSBTAG00000023434	SAMD4B/MED29/ZFP36/PLEKHG2/IL-15L/SUPT5H/BSP5/BSP1
	50308588	55099575	18	ENSBTAG00000018882/ENSBTAG00000023434	BSP5/BSP1
	61421776	65978584	18	ENSBTAG00000038947/ENSBTAG00000039946	ZSCAN4/ZNF814
	103556	29320178	19	ENSBTAG00000025200/ENSBTAG00000021681/ENSBTAG00000003365/ENSBTAG00000020089/ENSBTAG00000012672/ENSBTAG00000012137	ASIC2/PRR11/SMG8/USP32/ZNHIT3/NTN1
	103556	57407162	19	ENSBTAG00000015387/ENSBTAG00000003695/ENSBTAG00000018172/ENSBTAG00000011359/ENSBTAG00000025200/ENSBTAG00000018271/ENSBTAG00000021681/ENSBTAG00000003365/ENSBTAG00000020089/ENSBTAG00000012672/ENSBTAG00000012137/ENSBTAG00000015739	RAB40B/WDR45B/OGFOD3/CD7/ASIC2/SLC38A10/PRR11/SMG8/USP32/ZNHIT3/NTN1/MRC2
	103556	64007021	19	ENSBTAG00000015387/ENSBTAG00000003695/ENSBTAG00000018172/ENSBTAG00000011359/ENSBTAG00000025200/ENSBTAG00000018271/ENSBTAG00000021681/ENSBTAG00000003365/ENSBTAG00000020089/ENSBTAG00000012672/ENSBTAG00000006937/ENSBTAG00000006921/ENSBTAG00000012137/ENSBTAG00000039556/ENSBTAG00000015739	RAB40B/WDR45B/OGFOD3/CD7/ASIC2/SLC38A10/PRR11/SMG8/USP32/ZNHIT3/ABCA10/ABCA6/NTN1/WIPI1/MRC2
	4670556	26331593	19	ENSBTAG00000025200/ENSBTAG00000021681/ENSBTAG00000003365/ENSBTAG00000020089/ENSBTAG00000012672	ASIC2/PRR11/SMG8/USP32/ZNHIT3
	6954033	13303949	19	ENSBTAG00000021681/ENSBTAG00000003365/ENSBTAG00000020089/ENSBTAG00000012672	PRR11/SMG8/USP32/ZNHIT3
	8672624	12223474	19	ENSBTAG00000021681/ENSBTAG00000003365	PRR11/SMG8
	10724071	64007021	19	ENSBTAG00000015387/ENSBTAG00000003695/ENSBTAG00000018172/ENSBTAG00000011359/ENSBTAG00000025200/ENSBTAG00000018271/ENSBTAG00000020089/ENSBTAG00000012672/ENSBTAG00000006937/ENSBTAG00000006921/ENSBTAG00000012137/ENSBTAG00000039556/ENSBTAG00000015739	RAB40B/WDR45B/OGFOD3/CD7/ASIC2/SLC38A10/USP32/ZNHIT3/ABCA10/ABCA6/NTN1/WIPI1/MRC2
	11049355	15506868	19	ENSBTAG00000020089/ENSBTAG00000012672	USP32/ZNHIT3
	12388124	16239666	19	ENSBTAG00000025200/ENSBTAG00000020089/ENSBTAG00000012672	ASIC2/USP32/ZNHIT3
	12870553	30834957	19	ENSBTAG00000025200/ENSBTAG00000012137	ASIC2/NTN1
	14326037	19637405	19	ENSBTAG00000025200	ASIC2
	14488874	64007021	19	ENSBTAG00000015387/ENSBTAG00000003695/ENSBTAG00000018172/ENSBTAG00000011359/ENSBTAG00000025200/ENSBTAG00000018271/ENSBTAG00000006937/ENSBTAG00000006921/ENSBTAG00000012137/ENSBTAG00000039556/ENSBTAG00000015739	RAB40B/WDR45B/OGFOD3/CD7/ASIC2/SLC38A10/ABCA10/ABCA6/NTN1/WIPI1/MRC2
[truncated: 1,296 more rows]

## Sheet: Table S6
Table S6. Candidate genes identified between four methods for thermal tolerance in eight local Chinese cattle and Datong yak populations.
Methods	Chr	Genes name
[truncated: 126 more rows]

## Sheet: Table S7
Table S7. Enriched functions of all identified candidate genes for thermal tolerance in thirty two cattle, Datong yak and Bali populations.
[truncated: 633 more rows]

[truncated: 3 more sheets: Table S8, Table S9, Table S10]
